# Supplementary material for: Amoxicillin-resistant Streptococcus pneumoniae can be resensitized by targeting the mevalonate pathway as indicated by sCRilecs-seq
Source: eLife. 2022 Jun 24;11:e75607. doi: 10.7554/eLife.75607 (PMC9363119; doi:10.7554/eLife.75607)
Supplement: Supplementary file 1. [file elife-75607-supp1.xlsx]

## Sheet: ReadCounts
Gene_ID	FSCMax1	FSCMax2	FSCMax3	FSCMax4	FSCMax5	FSCMax6	FSCMiddle1	FSCMiddle2	FSCMiddle3	FSCMiddle4	FSCMiddle5	FSCMiddle6
sgRNA0001	0	17	4	18	31	43	0	0	13	19	21	0
sgRNA0002	49	141	148	159	101	187	201	163	11	116	85	51
sgRNA0003	548	265	648	544	250	639	7	37	9	8	45	76
sgRNA0004	121	96	169	111	94	107	89	63	91	101	121	99
sgRNA0005	43	180	72	160	223	144	207	60	127	267	93	111
sgRNA0006	46	90	278	93	92	127	24	25	129	111	109	85
sgRNA0007	18	184	76	230	223	186	0	128	134	222	207	68
sgRNA0008	0	72	48	124	101	124	107	50	31	169	79	38
sgRNA0009	23	147	53	187	304	186	219	0	73	292	136	174
sgRNA0010	66	290	261	267	220	238	56	120	95	344	133	129
sgRNA0011	390	507	232	425	586	212	51	212	105	240	409	25
sgRNA0012	25	7	13	58	17	37	0	99	154	18	18	57
sgRNA0013	49	187	113	196	132	251	95	259	279	272	150	232
sgRNA0014	248	170	165	103	93	173	18	39	157	184	64	319
sgRNA0015	243	169	70	160	154	207	307	103	138	165	162	340
sgRNA0016	0	147	90	157	166	160	4	61	181	195	161	98
sgRNA0017	239	161	84	227	121	200	179	82	216	285	142	198
sgRNA0018	168	180	172	180	106	136	134	64	200	208	62	403
sgRNA0019	65	125	143	147	189	205	266	99	76	198	189	211
sgRNA0020	119	130	35	96	93	81	71	130	38	144	76	0
sgRNA0021	36	57	135	67	61	131	8	124	127	105	39	124
sgRNA0022	114	102	42	153	205	132	82	10	87	202	98	37
sgRNA0023	18	126	124	194	120	153	27	146	171	195	57	73
sgRNA0024	44	175	272	195	111	173	22	76	150	237	52	193
sgRNA0025	70	214	123	120	136	163	0	76	29	222	126	133
sgRNA0026	17	115	84	81	87	87	95	53	18	128	71	99
sgRNA0027	403	170	235	186	165	182	153	59	189	214	206	211
sgRNA0028	31	102	41	118	134	117	0	110	50	193	67	204
sgRNA0029	50	157	111	116	153	117	42	52	327	208	78	129
sgRNA0030	44	82	391	93	22	110	0	85	42	7	55	43
sgRNA0031	0	232	179	233	265	241	243	56	176	338	134	244
sgRNA0032	0	109	113	189	206	171	152	73	257	265	123	306
sgRNA0033	115	228	82	255	255	272	99	246	212	366	341	133
sgRNA0034	225	80	147	94	66	80	21	0	26	158	61	148
sgRNA0035	150	37	202	78	46	537	51	0	0	0	13	0
sgRNA0036	771	10	824	17	18	453	0	32	7	0	0	0
sgRNA0037	18	110	62	159	112	129	110	0	97	187	71	158
sgRNA0038	146	138	178	80	125	118	81	54	36	156	79	84
sgRNA0039	53	184	99	134	94	167	160	38	49	212	73	71
sgRNA0040	41	60	255	99	79	99	118	27	98	131	40	117
sgRNA0041	17	115	82	169	160	151	120	44	62	216	212	288
sgRNA0042	76	192	251	261	198	210	207	45	175	273	175	259
sgRNA0043	137	106	63	124	143	126	60	74	122	165	76	112
sgRNA0044	71	58	71	75	30	57	63	132	44	34	6	0
sgRNA0045	32	64	113	64	101	93	0	31	58	82	109	57
sgRNA0046	177	502	333	389	402	465	147	0	28	33	36	90
sgRNA0047	49	143	240	146	129	196	283	260	119	249	224	209
sgRNA0048	329	192	0	214	178	175	53	90	131	234	122	98
sgRNA0049	0	72	99	55	17	76	174	27	186	46	89	22
sgRNA0050	32	135	61	109	207	163	84	49	263	199	82	190
sgRNA0051	118	91	92	143	127	132	58	130	131	148	136	184
sgRNA0052	241	228	167	129	150	157	241	138	107	198	157	148
sgRNA0053	14	131	15	119	77	97	16	102	100	135	148	44
sgRNA0054	0	153	119	98	63	150	0	48	29	154	113	41
sgRNA0055	0	64	42	67	88	102	30	38	91	85	78	138
sgRNA0056	74	130	274	179	121	232	221	103	378	188	146	308
sgRNA0057	7	112	144	111	82	101	155	144	107	179	230	79
sgRNA0058	0	140	73	129	194	183	330	108	268	265	118	122
sgRNA0059	102	166	77	228	241	155	165	51	117	241	125	268
sgRNA0060	17	162	86	214	241	213	253	224	227	281	245	142
sgRNA0061	83	143	83	163	127	122	0	0	183	218	130	167
sgRNA0062	33	133	71	190	149	137	67	84	122	162	57	107
sgRNA0063	27	127	116	150	135	105	220	131	103	223	166	128
sgRNA0064	30	323	65	284	221	320	187	139	248	424	160	345
sgRNA0065	257	202	242	339	313	283	132	175	146	309	277	413
sgRNA0066	100	223	64	152	161	198	187	86	127	256	295	155
sgRNA0067	221	139	72	134	159	178	134	59	123	141	147	254
sgRNA0068	43	91	37	131	128	116	38	85	102	192	79	98
sgRNA0069	0	96	72	81	166	54	61	48	86	76	135	267
sgRNA0070	135	67	89	71	123	95	76	76	21	83	122	128
sgRNA0071	121	405	438	311	232	537	24	137	73	49	5	0
sgRNA0072	30	110	268	130	65	119	0	360	70	131	100	185
sgRNA0073	35	74	168	114	61	141	48	114	103	142	94	69
sgRNA0074	0	192	102	181	247	178	39	0	110	242	342	57
sgRNA0075	56	137	12	156	178	119	0	66	0	235	193	50
sgRNA0076	266	533	444	419	359	346	126	253	130	382	367	146
sgRNA0077	44	82	182	171	179	160	252	83	52	153	70	160
sgRNA0078	34	182	159	238	168	225	173	82	64	299	268	233
sgRNA0079	621	60	677	48	123	103	287	192	68	13	29	22
sgRNA0080	84	75	432	89	126	295	617	60	205	74	5	295
sgRNA0081	173	21	596	22	136	67	12	29	34	3	6	70
sgRNA0082	0	24	241	33	71	159	0	15	71	5	32	0
sgRNA0083	30	184	155	181	238	199	57	7	245	246	158	206
sgRNA0084	73	130	64	228	177	188	48	80	190	252	53	173
sgRNA0085	14	121	74	117	91	120	131	37	86	122	185	178
sgRNA0086	152	150	108	109	135	116	184	23	17	146	85	79
sgRNA0087	0	16	42	12	16	14	0	13	0	1	5	17
sgRNA0088	73	138	131	140	54	98	1	36	66	140	95	141
sgRNA0089	23	147	62	170	174	144	180	66	97	253	212	136
sgRNA0090	0	190	99	186	237	241	100	206	232	343	116	113
sgRNA0091	143	144	404	130	222	167	0	31	377	204	135	409
sgRNA0092	495	143	435	137	117	161	130	129	170	109	34	98
sgRNA0093	7	7	8	24	35	23	0	14	19	19	0	0
sgRNA0094	83	157	388	182	161	180	88	127	142	230	192	228
sgRNA0095	120	5	60	9	5	353	0	74	0	0	0	0
sgRNA0096	8	190	293	248	275	291	97	170	318	364	364	213
sgRNA0097	0	141	25	138	176	168	146	79	208	194	151	150
sgRNA0098	97	35	430	18	61	56	64	52	0	0	30	13
sgRNA0099	320	31	95	30	65	43	191	45	0	16	21	3
sgRNA0100	87	23	92	36	21	39	0	79	0	28	47	34
sgRNA0101	7	85	250	111	84	114	15	230	82	148	74	65
sgRNA0102	209	154	167	241	203	209	114	132	254	289	41	146
sgRNA0103	91	177	156	192	147	233	71	56	204	285	124	154
sgRNA0104	33	124	25	144	103	207	20	34	25	206	184	95
sgRNA0105	73	146	214	139	168	123	111	43	127	183	98	210
sgRNA0106	56	208	174	177	135	262	48	100	143	230	90	97
sgRNA0107	1	165	136	141	156	144	164	113	128	246	237	151
sgRNA0108	199	195	44	127	126	167	0	58	103	195	141	235
sgRNA0109	0	31	39	71	63	49	0	165	31	70	22	46
sgRNA0110	80	92	33	112	82	129	33	11	79	135	62	92
sgRNA0111	108	57	452	16	100	76	0	69	0	12	1	14
sgRNA0112	0	96	33	95	126	114	295	9	130	170	81	55
sgRNA0113	11	122	98	102	86	98	191	52	71	99	261	101
sgRNA0114	0	71	120	64	61	74	36	83	7	53	124	35
sgRNA0115	0	95	54	87	84	115	42	24	116	139	112	214
sgRNA0116	32	161	59	168	133	155	127	146	184	301	125	250
sgRNA0117	60	63	43	71	109	78	91	0	131	100	118	86
sgRNA0118	256	161	70	130	167	194	295	32	94	264	103	228
sgRNA0119	44	182	192	184	150	215	30	530	255	244	186	167
sgRNA0120	195	235	132	294	280	305	218	188	165	335	123	128
sgRNA0121	27	12	0	9	42	32	0	60	0	4	0	0
sgRNA0122	11	0	17	4	11	3	43	72	0	0	0	0
sgRNA0123	77	109	0	129	169	193	0	0	167	182	180	101
sgRNA0124	46	141	139	123	186	110	334	62	171	160	147	75
sgRNA0125	49	108	27	178	138	184	172	87	61	171	49	167
sgRNA0126	69	127	0	140	78	87	123	64	73	112	87	26
sgRNA0127	4816	151	3120	91	398	56	5724	3165	1062	32	1191	1442
sgRNA0128	973	221	551	224	400	134	1682	1886	693	456	1742	728
sgRNA0129	157	198	329	236	87	210	232	39	286	279	188	132
sgRNA0130	61	34	49	20	21	38	52	74	169	53	45	45
sgRNA0131	29	101	97	117	99	84	0	29	113	161	108	104
sgRNA0132	363	188	125	159	124	167	40	0	0	18	28	1
sgRNA0133	23	87	292	109	91	209	0	49	80	46	8	133
sgRNA0134	0	13	10	2	13	8	33	0	6	1	0	12
sgRNA0135	1771	2329	2762	611	1991	397	85	365	0	50	305	74
sgRNA0136	97	64	90	128	81	97	0	114	89	115	71	49
sgRNA0137	104	130	58	103	58	107	71	123	64	144	127	98
sgRNA0138	163	71	12	102	123	99	31	134	56	95	15	43
sgRNA0139	73	244	282	235	200	168	161	108	211	55	135	38
sgRNA0140	53	77	133	99	82	119	49	0	61	110	80	56
sgRNA0141	253	137	78	133	82	145	32	106	264	175	68	180
sgRNA0142	74	145	248	144	144	160	49	43	123	276	248	53
sgRNA0143	0	114	87	134	85	115	385	171	127	173	53	126
sgRNA0144	34	11	19	18	8	54	104	9	39	28	30	203
sgRNA0145	32	223	47	245	184	163	162	37	281	261	127	163
sgRNA0146	328	154	33	149	95	191	88	96	254	214	67	173
sgRNA0147	365	537	872	204	824	120	174	28	95	43	133	29
sgRNA0148	0	56	297	108	141	144	40	106	0	56	171	37
sgRNA0149	50	114	123	120	125	146	73	89	105	217	42	74
sgRNA0150	197	26	121	58	134	225	685	128	181	29	46	167
sgRNA0151	0	0	0	0	4	24	0	12	5	0	0	0
sgRNA0152	12	102	41	110	75	124	171	30	76	185	73	144
sgRNA0153	283	254	218	276	214	320	256	367	295	343	232	292
sgRNA0154	0	109	284	159	121	190	24	22	100	162	175	133
sgRNA0155	28	106	79	116	78	137	0	25	215	125	66	51
sgRNA0156	99	301	261	255	266	330	105	186	483	372	236	452
sgRNA0157	0	121	162	114	116	133	171	131	80	167	134	262
sgRNA0158	0	75	0	76	97	98	42	109	129	143	82	15
sgRNA0159	542	177	148	182	156	163	81	120	337	246	191	162
sgRNA0160	336	2350	428	1551	1653	905	76	114	220	251	554	319
sgRNA0161	11	38	17	54	32	64	54	0	35	62	25	0
sgRNA0162	14	138	4	127	165	155	138	42	93	230	64	233
sgRNA0163	179	151	73	195	231	144	112	0	250	254	122	304
sgRNA0164	48	174	167	197	229	227	680	7	244	252	197	93
sgRNA0165	0	132	54	132	181	116	0	128	3	118	140	28
sgRNA0166	43	66	106	60	51	60	63	0	135	83	71	26
sgRNA0167	79	22	93	18	15	124	64	117	278	5	0	58
sgRNA0168	30	77	54	107	109	134	135	90	226	124	32	89
sgRNA0169	390	116	145	127	64	162	68	185	435	317	230	219
sgRNA0170	11	130	41	147	167	151	29	38	50	168	65	83
sgRNA0171	46	57	24	49	46	46	31	40	35	111	35	33
sgRNA0172	74	289	370	222	312	240	116	55	206	319	285	198
sgRNA0173	180	138	186	144	114	120	0	171	51	148	87	34
sgRNA0174	30	144	45	100	120	94	16	57	171	150	92	89
sgRNA0175	15	157	133	156	103	185	0	270	82	220	192	128
sgRNA0176	146	294	387	342	358	241	320	138	351	328	85	251
sgRNA0177	62	179	171	199	83	145	106	120	123	261	125	215
sgRNA0178	10	238	104	256	170	175	73	18	255	427	227	174
sgRNA0179	130	107	26	102	90	100	99	0	71	158	221	71
sgRNA0180	72	78	4	135	70	80	101	0	58	144	106	119
sgRNA0181	325	201	535	183	192	193	330	12	346	274	178	151
sgRNA0182	36	138	29	143	132	128	54	36	227	208	129	262
sgRNA0183	245	61	93	62	102	66	0	92	15	56	114	22
sgRNA0184	98	57	0	39	29	55	129	118	96	34	8	59
sgRNA0185	164	114	121	117	179	138	177	214	119	212	168	0
sgRNA0186	231	154	163	139	138	181	112	31	121	247	88	169
sgRNA0187	244	67	28	24	76	42	0	51	19	24	96	98
sgRNA0188	53	203	159	190	178	221	344	21	216	242	191	155
sgRNA0189	76	161	137	167	189	134	132	84	272	247	199	229
sgRNA0190	77	93	40	183	244	169	49	62	393	237	178	98
sgRNA0191	63	35	46	35	25	34	95	93	76	34	17	25
sgRNA0192	30	150	194	90	55	121	197	32	13	174	51	91
sgRNA0193	20	242	151	254	192	303	373	221	265	356	232	313
sgRNA0194	123	10	229	45	30	69	21	150	51	25	64	142
sgRNA0195	32	78	41	108	108	111	149	290	134	107	137	56
sgRNA0196	26	84	74	119	90	85	0	51	113	147	125	143
sgRNA0197	14	5	14	36	57	52	83	154	7	28	37	9
sgRNA0198	300	213	186	193	242	268	136	202	223	287	149	247
sgRNA0199	0	206	408	222	254	215	77	38	357	285	160	166
sgRNA0200	22	96	60	206	155	167	109	23	165	163	124	149
sgRNA0201	175	352	278	279	362	300	0	196	124	46	120	229
sgRNA0202	245	172	372	292	160	294	115	0	90	252	121	112
sgRNA0203	252	138	300	150	166	151	49	21	163	207	55	85
sgRNA0204	308	240	190	287	300	301	90	58	257	326	158	176
sgRNA0205	310	274	129	219	221	249	288	89	140	338	187	184
sgRNA0206	15	223	154	173	188	216	158	175	120	233	78	140
sgRNA0207	157	172	132	139	135	133	181	84	51	173	139	201
sgRNA0208	334	228	201	279	317	304	286	232	219	403	273	255
sgRNA0209	119	27	33	28	20	31	0	25	9	12	0	0
sgRNA0210	294	276	315	313	320	273	288	263	204	479	352	286
sgRNA0211	243	182	33	152	161	173	307	38	91	274	69	281
sgRNA0212	0	120	115	121	87	150	120	70	31	90	10	36
sgRNA0213	45	313	273	203	283	264	122	7	99	179	226	204
sgRNA0214	38	170	117	193	174	191	274	16	195	237	242	136
sgRNA0215	37	360	248	310	335	402	238	109	212	475	324	277
sgRNA0216	68	244	442	324	249	272	195	208	427	385	243	190
sgRNA0217	293	235	117	258	271	242	363	118	177	270	75	241
sgRNA0218	548	223	146	203	195	159	25	222	176	308	186	119
sgRNA0219	170	165	121	146	170	163	223	105	249	274	185	150
sgRNA0220	0	56	87	27	53	54	0	60	0	81	42	5
sgRNA0221	32	212	232	212	146	182	30	52	177	260	269	86
sgRNA0222	93	54	414	102	111	184	82	0	168	81	89	324
sgRNA0223	271	346	303	399	276	417	174	185	230	469	206	274
sgRNA0224	247	227	317	251	182	263	135	166	319	367	281	39
sgRNA0225	45	359	160	382	264	314	194	166	340	421	286	320
sgRNA0226	84	118	146	164	153	234	60	18	43	154	72	121
sgRNA0227	0	181	88	159	170	157	167	92	109	230	122	182
sgRNA0228	118	303	369	157	319	121	48	111	0	17	22	0
sgRNA0229	128	199	159	246	130	228	94	227	431	292	153	343
sgRNA0230	65	240	28	256	189	214	118	175	244	303	165	226
sgRNA0231	272	124	210	148	111	179	89	110	156	230	119	116
sgRNA0232	0	43	20	30	55	55	126	71	70	60	9	0
sgRNA0233	267	170	234	161	179	153	121	141	187	270	104	166
sgRNA0234	170	134	124	207	179	242	0	86	52	268	154	277
sgRNA0235	50	46	95	59	62	88	0	18	70	131	31	101
sgRNA0236	388	311	93	284	275	305	157	143	354	350	161	129
sgRNA0237	59	152	107	182	241	180	0	98	193	248	79	302
sgRNA0238	72	109	152	145	123	182	0	93	52	213	55	215
sgRNA0239	54	79	77	78	52	153	262	66	141	117	33	9
sgRNA0240	34	105	152	125	102	148	0	82	71	156	121	108
sgRNA0241	45	108	54	90	146	136	310	187	300	153	124	166
sgRNA0242	93	196	144	217	203	204	0	117	126	262	125	321
sgRNA0243	143	126	93	124	143	98	257	41	208	179	121	164
sgRNA0244	607	409	812	304	422	379	142	291	106	76	67	100
sgRNA0245	60	119	230	154	102	175	11	63	146	199	101	87
sgRNA0246	90	40	6	35	32	50	0	30	11	45	9	38
sgRNA0247	63	96	125	98	90	97	46	117	167	57	13	26
sgRNA0248	129	171	126	133	121	186	0	92	119	166	136	126
sgRNA0249	4	4	1	5	2	1	10	5	1	6	2	1
sgRNA0250	128	115	137	188	182	187	207	25	133	215	134	359
sgRNA0251	22	140	136	137	128	118	97	82	196	160	128	206
sgRNA0252	69	114	105	91	217	108	158	29	184	164	117	33
sgRNA0253	80	27	118	15	43	37	141	72	33	3	0	0
sgRNA0254	0	95	15	72	76	122	113	64	88	146	22	20
sgRNA0255	155	118	23	144	137	134	101	154	135	167	179	210
sgRNA0256	192	241	129	273	177	281	157	47	228	268	78	242
sgRNA0257	178	148	145	181	148	188	123	125	38	223	83	284
sgRNA0258	248	145	15	115	82	99	98	88	216	199	161	266
sgRNA0259	0	8	9	21	14	48	0	7	7	11	0	0
sgRNA0260	118	118	148	99	200	123	273	38	169	161	79	27
sgRNA0261	237	171	234	237	179	173	620	85	173	212	119	223
sgRNA0262	141	78	26	120	74	102	38	171	40	171	224	101
sgRNA0263	29	197	111	253	154	215	334	77	66	280	150	199
sgRNA0264	28	203	24	116	135	126	25	56	117	184	188	163
sgRNA0265	32	101	87	112	138	110	9	0	68	165	36	217
sgRNA0266	172	113	24	108	97	130	28	44	20	125	22	271
sgRNA0267	0	196	88	200	148	180	94	73	185	239	148	60
sgRNA0268	24	454	409	524	284	380	103	194	66	347	105	83
sgRNA0269	452	108	265	81	75	100	0	0	28	12	10	11
sgRNA0270	146	147	220	159	193	206	52	55	14	11	88	45
sgRNA0271	6	164	155	239	142	177	264	59	119	322	140	315
sgRNA0272	114	117	122	163	191	139	164	100	122	223	152	123
sgRNA0273	304	178	183	154	121	267	426	101	176	241	154	129
sgRNA0274	29	114	88	78	104	80	102	65	154	138	108	245
sgRNA0275	101	155	60	141	186	122	55	133	101	199	133	171
sgRNA0276	187	155	307	168	163	139	70	171	199	249	301	189
sgRNA0277	45	180	145	178	120	239	298	11	104	249	162	268
sgRNA0278	104	128	132	160	168	125	0	91	133	220	147	164
sgRNA0279	37	181	467	164	129	180	147	221	237	227	131	388
sgRNA0280	50	193	133	162	160	210	44	272	259	211	230	226
sgRNA0281	10	81	33	73	74	73	108	29	20	53	35	65
sgRNA0282	54	143	182	71	111	168	68	178	64	95	46	31
sgRNA0283	440	75	247	47	114	88	150	172	88	13	56	32
sgRNA0284	0	28	9	27	49	25	38	7	7	30	19	28
sgRNA0285	35	65	232	96	81	162	108	0	147	129	70	78
sgRNA0286	78	48	41	37	22	123	311	160	164	63	21	165
sgRNA0287	186	49	79	31	45	48	0	90	20	23	9	46
sgRNA0288	50	136	160	111	144	123	147	181	135	126	40	185
sgRNA0289	56	155	113	179	146	167	99	52	112	150	179	117
sgRNA0290	147	256	320	234	275	297	430	184	390	182	97	243
sgRNA0291	137	167	280	183	187	164	53	92	256	148	110	53
sgRNA0292	136	201	283	226	159	206	270	45	108	303	170	347
sgRNA0293	98	255	321	273	196	286	612	35	226	347	246	176
sgRNA0294	848	44	216	59	81	78	162	271	39	30	60	80
sgRNA0295	226	210	145	172	173	253	100	175	127	262	212	392
sgRNA0296	16	185	56	260	300	270	304	148	365	315	175	187
sgRNA0297	39	145	91	247	205	181	151	66	382	212	171	90
sgRNA0298	0	143	179	152	168	179	391	126	207	277	132	220
sgRNA0299	9	95	133	192	173	171	23	74	57	263	164	75
sgRNA0300	48	268	137	248	187	204	287	444	450	311	262	324
sgRNA0301	170	197	110	162	215	184	475	337	80	199	262	132
sgRNA0302	40	3	11	14	28	19	50	68	23	7	0	23
sgRNA0303	64	26	6	16	60	48	0	144	13	13	46	0
sgRNA0304	30	131	246	168	174	156	97	144	144	210	226	174
sgRNA0305	0	171	39	148	87	212	44	102	214	216	82	184
sgRNA0306	52	126	173	156	187	140	290	122	68	248	185	78
sgRNA0307	167	282	205	284	146	258	890	248	296	381	260	337
sgRNA0308	283	186	159	220	161	209	182	95	241	318	216	84
sgRNA0309	96	139	87	203	140	197	0	208	190	215	168	53
sgRNA0310	15	253	128	220	217	214	151	151	125	251	245	176
sgRNA0311	10	103	40	134	116	133	157	234	123	133	112	89
sgRNA0312	0	200	107	195	203	260	33	0	57	272	257	124
sgRNA0313	43	97	194	107	130	96	101	11	21	120	111	106
sgRNA0314	153	156	72	224	229	288	318	236	106	281	239	129
sgRNA0315	133	91	72	60	92	44	0	56	0	16	77	6
sgRNA0316	112	190	267	209	115	218	149	124	113	291	238	376
sgRNA0317	291	87	156	121	94	186	258	140	142	205	140	326
sgRNA0318	13	39	28	57	31	27	0	0	0	35	32	14
sgRNA0319	119	111	173	118	93	137	280	93	110	153	80	75
sgRNA0320	318	110	106	198	127	226	85	65	233	215	331	180
sgRNA0321	51	213	7	179	204	210	245	236	142	246	115	200
sgRNA0322	488	196	294	279	211	224	299	89	213	379	185	149
sgRNA0323	145	5	48	8	59	25	40	90	0	1	3	0
sgRNA0324	116	230	65	211	131	197	218	105	122	260	308	209
sgRNA0325	13	163	215	203	141	191	105	61	160	154	104	124
sgRNA0326	111	168	55	161	267	171	196	0	173	263	90	32
sgRNA0327	124	169	22	203	186	144	198	38	37	148	217	33
sgRNA0328	45	225	522	154	296	119	418	62	169	29	100	269
sgRNA0329	137	285	216	294	250	284	144	62	336	353	243	288
sgRNA0330	88	234	108	228	157	254	273	136	184	299	78	388
sgRNA0331	93	112	229	150	120	160	212	119	291	212	132	520
sgRNA0332	201	231	213	250	210	244	0	104	180	252	155	98
sgRNA0333	58	150	95	232	188	174	120	13	248	225	217	252
sgRNA0334	55	21	103	50	12	337	54	30	0	6	5	43
sgRNA0335	74	20	3	8	25	26	115	15	81	2	1	51
sgRNA0336	79	158	138	190	176	172	68	81	293	181	68	42
sgRNA0337	236	106	115	162	128	133	191	100	99	181	115	54
sgRNA0338	74	115	108	120	119	125	107	115	62	159	53	127
sgRNA0339	36	65	46	83	128	73	0	129	47	99	65	110
sgRNA0340	56	202	333	267	199	231	142	133	175	342	154	144
sgRNA0341	85	117	40	72	69	122	103	84	76	136	47	122
sgRNA0342	153	166	293	188	90	148	0	54	210	194	35	141
sgRNA0343	143	167	107	186	216	176	79	208	148	207	137	253
sgRNA0344	129	202	240	156	214	169	118	57	67	123	109	92
sgRNA0345	17	134	369	194	160	154	71	121	197	225	67	58
sgRNA0346	261	84	138	103	63	151	159	6	308	155	128	27
sgRNA0347	29	15	0	21	29	51	3	11	13	24	0	0
sgRNA0348	422	175	221	262	162	292	242	276	260	327	176	241
sgRNA0349	62	103	74	146	65	164	125	133	95	198	128	141
sgRNA0350	43	54	44	76	132	79	243	36	44	160	68	79
sgRNA0351	207	185	273	129	183	180	23	119	129	215	137	199
sgRNA0352	25	79	234	76	91	133	136	139	35	84	98	131
sgRNA0353	43	181	386	208	197	201	110	100	203	263	189	259
sgRNA0354	11	115	161	134	78	128	71	86	179	224	64	38
sgRNA0355	182	52	84	69	34	69	98	73	37	22	2	117
sgRNA0356	61	93	0	94	154	150	261	83	163	244	159	109
sgRNA0357	15	247	203	245	208	241	154	146	246	330	274	325
sgRNA0358	100	7	238	48	102	68	121	51	83	41	14	0
sgRNA0359	219	15	169	6	56	11	14	68	0	2	0	4
sgRNA0360	0	206	101	170	244	212	212	160	368	282	211	207
sgRNA0361	104	229	132	236	112	222	86	102	121	281	131	316
sgRNA0362	81	75	51	42	70	73	0	106	212	37	62	56
sgRNA0363	45	216	61	208	121	177	364	33	55	287	201	217
sgRNA0364	58	50	92	69	105	111	199	153	102	75	31	50
sgRNA0365	494	154	92	159	145	169	332	16	130	214	120	391
sgRNA0366	249	160	196	137	165	129	1	166	42	187	97	164
sgRNA0367	13	58	52	47	55	68	24	27	47	50	44	26
sgRNA0368	62	107	178	279	125	214	70	290	35	76	16	51
sgRNA0369	21	32	0	38	44	94	112	22	56	45	0	72
sgRNA0370	1513	67	163	19	94	24	834	329	102	32	54	50
sgRNA0371	0	0	23	8	25	32	0	43	57	15	4	0
sgRNA0372	163	191	566	231	156	623	40	57	0	11	6	4
sgRNA0373	94	208	319	211	137	266	93	143	149	290	219	156
sgRNA0374	18	89	54	141	49	159	0	67	82	111	49	253
sgRNA0375	0	132	12	133	154	158	172	55	279	183	111	317
sgRNA0376	33	168	108	233	176	219	109	117	171	299	128	79
sgRNA0377	56	184	300	193	103	155	145	75	211	229	369	98
sgRNA0378	0	124	12	79	179	93	49	26	109	133	93	139
sgRNA0379	131	96	78	145	174	172	0	214	59	203	47	60
sgRNA0380	6	109	83	54	53	66	0	17	22	105	116	225
sgRNA0381	89	152	33	105	81	142	194	73	94	206	194	161
sgRNA0382	36	159	19	93	124	63	203	113	0	123	63	19
sgRNA0383	80	78	82	128	93	126	362	137	48	61	29	99
sgRNA0384	13	161	149	170	242	149	125	22	311	237	164	12
sgRNA0385	105	167	45	147	199	121	93	19	262	102	173	352
sgRNA0386	5	127	111	215	187	185	54	25	124	271	173	250
sgRNA0387	10	123	179	140	159	160	0	82	302	201	79	156
sgRNA0388	52	147	33	138	139	154	21	104	134	180	132	151
sgRNA0389	124	277	494	266	301	283	133	52	232	284	275	196
sgRNA0390	130	280	452	376	337	353	710	396	395	507	279	343
sgRNA0391	121	203	420	201	155	189	111	54	184	269	129	87
sgRNA0392	10	117	148	118	132	154	134	0	138	159	134	60
sgRNA0393	79	184	23	160	260	185	27	99	129	243	212	167
sgRNA0394	170	134	31	199	130	187	88	209	265	262	83	395
sgRNA0395	16	25	42	31	28	60	4	0	0	6	0	5
sgRNA0396	14	37	8	34	13	35	0	24	26	6	19	0
sgRNA0397	73	103	30	87	91	72	113	41	83	46	32	0
sgRNA0398	36	177	113	184	240	195	229	196	304	258	175	269
sgRNA0399	16	107	92	143	126	109	77	59	79	192	131	146
sgRNA0400	24	133	41	119	167	144	128	192	30	162	147	47
sgRNA0401	30	64	94	127	54	145	85	73	54	137	92	76
sgRNA0402	0	120	10	63	78	169	18	74	12	141	96	15
sgRNA0403	90	92	189	69	118	88	159	35	0	75	66	17
sgRNA0404	109	85	79	108	98	155	12	23	79	100	82	119
sgRNA0405	116	187	163	173	157	200	227	32	339	261	163	211
sgRNA0406	0	70	193	106	127	96	33	0	106	123	96	133
sgRNA0407	206	258	150	309	151	289	237	61	324	391	417	229
sgRNA0408	71	83	143	107	44	123	336	84	40	187	88	92
sgRNA0409	18	103	225	101	102	181	0	51	25	27	0	33
sgRNA0410	0	91	25	92	46	90	244	110	86	146	60	122
sgRNA0411	0	151	145	154	129	124	180	80	286	200	11	194
sgRNA0412	119	165	6	144	242	130	209	63	129	228	207	150
sgRNA0413	16	129	147	134	165	133	194	183	124	183	64	159
sgRNA0414	222	161	420	128	87	111	0	66	0	14	9	53
sgRNA0415	272	106	12	135	163	123	0	9	96	155	46	131
sgRNA0416	161	103	15	90	91	83	120	98	120	162	29	36
sgRNA0417	95	101	25	111	196	137	144	151	163	190	81	159
sgRNA0418	275	317	280	254	334	325	310	68	528	351	337	367
sgRNA0419	6	160	123	256	199	185	51	87	79	272	78	155
sgRNA0420	280	134	132	176	166	165	0	116	106	216	125	106
sgRNA0421	50	102	170	115	189	143	17	32	178	150	83	269
sgRNA0422	39	9	145	30	32	118	0	68	0	17	15	0
sgRNA0423	31	163	159	155	106	115	145	185	110	134	54	16
sgRNA0424	209	180	20	215	200	172	61	0	114	131	114	30
sgRNA0425	58	178	75	211	196	205	248	210	133	205	158	55
sgRNA0426	48	171	90	245	193	189	277	178	38	316	124	220
sgRNA0427	182	145	69	185	192	168	18	57	343	260	282	324
sgRNA0428	86	318	29	221	276	193	60	60	152	156	235	125
sgRNA0429	59	178	37	127	178	140	223	85	98	171	177	70
sgRNA0430	63	135	0	145	154	96	195	168	41	169	173	114
sgRNA0431	632	1900	826	714	2067	393	484	595	93	40	49	122
sgRNA0432	728	1727	2604	508	2081	281	0	46	0	38	96	0
sgRNA0433	168	200	51	196	157	210	262	108	77	237	62	258
sgRNA0434	289	150	10	225	166	194	44	34	111	163	146	194
sgRNA0435	0	84	190	110	114	130	212	112	123	167	89	95
sgRNA0436	11	128	18	112	133	135	90	123	320	188	70	147
sgRNA0437	134	160	266	166	232	149	135	371	345	182	206	230
sgRNA0438	121	135	233	251	192	184	333	201	126	255	168	228
sgRNA0439	316	160	122	182	114	181	188	66	149	256	100	187
sgRNA0440	10	70	0	72	57	68	0	21	37	68	29	0
sgRNA0441	64	201	242	246	342	275	141	199	205	327	138	243
sgRNA0442	25	113	94	134	86	139	0	0	145	129	133	183
sgRNA0443	157	52	184	9	69	52	29	61	18	4	26	10
sgRNA0444	204	164	115	241	182	225	91	141	58	312	202	140
sgRNA0445	50	129	18	145	103	175	227	39	110	203	89	111
sgRNA0446	48	134	464	106	129	213	32	57	82	245	5	117
sgRNA0447	12	14	0	44	19	56	0	22	45	43	28	133
sgRNA0448	270	63	53	83	77	89	269	25	122	154	121	76
sgRNA0449	0	158	219	96	113	116	18	29	144	158	125	101
sgRNA0450	29	3	18	6	11	21	165	0	35	2	0	0
sgRNA0451	124	200	281	230	255	196	0	79	77	270	191	139
sgRNA0452	71	114	69	114	54	90	54	0	99	118	29	15
sgRNA0453	66	105	36	108	157	151	42	135	62	154	52	228
sgRNA0454	250	193	248	261	308	215	609	62	227	328	183	206
sgRNA0455	25	1473	776	810	1132	475	0	76	0	1	0	35
sgRNA0456	201	235	277	255	213	235	71	35	177	158	6	68
sgRNA0457	211	233	93	109	182	164	0	32	50	127	72	37
sgRNA0458	176	167	116	142	174	154	172	203	184	208	181	246
sgRNA0459	25	197	217	216	148	236	157	290	235	329	91	185
sgRNA0460	5	10	44	10	34	40	16	60	39	11	0	78
sgRNA0461	17	3	8	0	0	3	0	0	0	2	0	0
sgRNA0462	272	138	36	145	205	141	30	168	64	227	164	130
sgRNA0463	3	54	74	51	30	78	0	138	93	63	104	185
sgRNA0464	22	279	65	224	235	178	190	194	157	307	176	107
sgRNA0465	180	219	255	352	223	271	434	88	157	407	350	280
sgRNA0466	13	137	133	253	158	228	45	67	86	184	118	108
sgRNA0467	10	110	60	109	90	111	0	21	0	67	117	49
sgRNA0468	245	156	181	176	158	147	59	60	143	229	321	227
sgRNA0469	9	240	34	215	204	225	273	280	126	273	280	211
sgRNA0470	89	182	319	152	215	210	60	294	218	283	90	242
sgRNA0471	62	234	171	195	122	194	173	106	236	260	176	107
sgRNA0472	0	136	79	179	199	206	338	85	110	288	199	145
sgRNA0473	55	170	156	166	209	152	238	81	168	251	218	223
sgRNA0474	28	286	109	361	253	302	304	190	376	402	267	263
sgRNA0475	12	344	465	299	245	309	267	353	484	274	141	326
sgRNA0476	0	153	335	164	194	141	197	40	188	187	224	152
sgRNA0477	51	144	93	104	115	93	110	0	101	196	32	276
sgRNA0478	0	146	210	142	238	152	237	22	155	184	153	42
sgRNA0479	284	330	337	307	255	333	437	236	272	457	221	244
sgRNA0480	91	106	49	94	63	107	33	19	95	70	105	99
sgRNA0481	115	147	297	229	158	269	344	83	20	120	19	342
sgRNA0482	346	53	20	71	106	74	166	27	35	77	20	132
sgRNA0483	0	64	29	99	91	89	14	44	87	109	48	72
sgRNA0484	24	202	588	271	226	245	463	228	218	309	142	102
sgRNA0485	193	268	214	291	230	272	66	67	182	291	186	259
sgRNA0486	22	124	157	121	111	112	183	19	51	111	58	98
sgRNA0487	50	40	31	47	9	54	132	46	0	24	27	26
sgRNA0488	0	180	111	93	91	80	223	84	61	164	125	133
sgRNA0489	182	158	57	177	192	170	73	188	114	242	141	117
sgRNA0490	26	144	22	196	151	157	52	94	315	266	124	135
sgRNA0491	0	162	110	164	116	170	221	162	163	188	70	318
sgRNA0492	82	77	39	56	75	90	0	162	23	23	4	97
sgRNA0493	7	334	33	184	208	152	0	197	394	229	456	506
sgRNA0494	15190	1187	5757	394	1526	273	3995	6895	3082	128	2888	1325
sgRNA0495	497	767	669	727	666	842	0	399	97	264	89	389
sgRNA0496	103	214	169	183	160	236	145	376	116	295	197	268
sgRNA0497	62	127	90	167	126	156	18	76	196	141	53	89
sgRNA0498	52	232	159	245	217	242	135	301	138	424	335	200
sgRNA0499	0	113	49	59	101	39	0	77	4	93	80	2
sgRNA0500	165	533	1226	279	428	232	128	0	330	69	167	246
sgRNA0501	0	5	99	15	32	24	29	79	18	0	11	0
sgRNA0502	193	380	398	361	282	286	508	51	265	427	206	410
sgRNA0503	160	83	17	77	84	86	38	18	57	100	65	53
sgRNA0504	279	108	14	90	75	132	56	59	66	87	80	103
sgRNA0505	1465	782	1623	172	573	133	244	321	102	92	436	118
sgRNA0506	0	4	0	5	25	22	0	20	0	2	7	0
sgRNA0507	46	59	131	86	138	115	48	12	33	137	111	58
sgRNA0508	17	52	82	116	89	90	154	109	3	153	68	0
sgRNA0509	133	331	96	273	255	306	35	84	239	362	266	303
sgRNA0510	197	297	130	309	322	299	0	34	122	206	192	55
sgRNA0511	685	75	191	76	137	107	29	175	123	15	50	57
sgRNA0512	379	66	139	21	44	36	0	191	15	5	0	0
sgRNA0513	57	8	9	30	54	91	37	56	46	19	0	0
sgRNA0514	15	12	66	20	0	55	0	31	35	21	5	31
sgRNA0515	117	210	295	250	256	243	294	96	163	299	77	79
sgRNA0516	34	171	90	201	135	211	183	0	70	228	117	213
sgRNA0517	43	175	81	173	225	189	391	96	264	273	132	110
sgRNA0518	12	189	233	236	185	236	166	120	204	294	190	224
sgRNA0519	132	188	145	178	168	111	85	70	39	123	139	0
sgRNA0520	16	104	37	117	110	93	0	73	72	140	133	185
sgRNA0521	60	56	168	40	55	155	127	8	56	53	60	71
sgRNA0522	120	29	229	66	35	355	0	108	46	4	0	9
sgRNA0523	54	253	124	307	197	267	196	249	146	383	401	439
sgRNA0524	112	18	15	15	36	23	14	78	5	15	12	7
sgRNA0525	203	91	12	109	77	203	574	57	91	125	60	41
sgRNA0526	0	54	32	67	27	92	156	130	64	77	54	9
sgRNA0527	7	38	25	14	32	38	63	216	48	27	16	6
sgRNA0528	5	85	191	90	77	120	36	26	32	187	67	64
sgRNA0529	25	140	235	179	164	199	37	92	118	207	104	161
sgRNA0530	0	146	44	131	87	117	0	139	52	166	83	43
sgRNA0531	0	116	85	110	104	106	48	26	61	119	100	99
sgRNA0532	367	552	200	606	602	417	181	65	294	507	528	332
sgRNA0533	163	450	439	258	251	332	103	115	207	363	255	387
sgRNA0534	23	115	217	172	128	220	124	121	123	265	106	174
sgRNA0535	1072	612	1146	118	770	156	145	423	71	71	366	0
sgRNA0536	429	218	149	287	200	320	220	75	245	421	131	143
sgRNA0537	337	293	303	295	299	371	136	85	364	493	401	179
sgRNA0538	115	53	105	39	42	109	142	220	92	28	35	202
sgRNA0539	0	52	62	68	56	69	0	109	97	126	131	84
sgRNA0540	38	252	99	290	260	315	34	52	95	319	147	166
sgRNA0541	17	48	23	47	39	57	0	113	55	42	42	12
sgRNA0542	9	370	176	201	299	92	23	15	98	94	108	52
sgRNA0543	32	72	18	88	54	110	290	73	33	104	67	188
sgRNA0544	0	156	12	294	207	264	0	51	153	138	0	14
sgRNA0545	180	79	41	74	56	161	15	143	84	79	63	25
sgRNA0546	91	110	63	142	189	136	0	212	247	184	80	75
sgRNA0547	13	135	85	104	84	172	6	30	168	156	162	272
sgRNA0548	7	82	155	98	76	106	0	84	266	120	61	135
sgRNA0549	142	37	45	18	33	52	98	50	0	6	22	46
sgRNA0550	0	139	7	97	128	146	0	101	26	182	124	188
sgRNA0551	68	236	265	243	223	162	0	91	267	273	188	196
sgRNA0552	182	183	186	137	180	162	256	174	207	258	213	92
sgRNA0553	46	99	37	143	46	179	209	127	261	147	94	111
sgRNA0554	42	186	63	286	217	225	417	115	270	295	163	229
sgRNA0555	269	75	362	89	116	234	32	148	199	85	78	165
sgRNA0556	39	84	119	139	121	137	109	119	238	263	106	95
sgRNA0557	19	71	8	67	144	165	352	136	204	79	113	266
sgRNA0558	13	123	51	127	168	174	0	14	376	238	132	132
sgRNA0559	174	210	270	197	157	153	166	243	141	237	120	119
sgRNA0560	163	319	93	183	439	89	365	59	92	144	270	352
sgRNA0561	49	142	18	193	168	182	328	66	76	218	112	169
sgRNA0562	46	183	126	100	102	118	69	66	59	168	51	59
sgRNA0563	83	243	43	249	118	212	42	153	254	279	125	114
sgRNA0564	21	23	39	41	24	83	113	101	120	54	8	52
sgRNA0565	18	46	3	29	0	88	0	81	0	0	0	0
sgRNA0566	48	224	165	282	349	342	92	107	247	317	322	417
sgRNA0567	0	38	37	40	96	56	0	174	0	7	0	0
sgRNA0568	318	427	360	506	326	407	29	87	181	317	53	78
sgRNA0569	383	253	65	252	99	198	401	71	0	327	199	154
sgRNA0570	244	209	279	255	173	231	149	85	114	288	302	76
sgRNA0571	390	296	233	254	169	250	640	134	361	332	179	273
sgRNA0572	265	115	98	167	104	191	40	27	155	210	160	148
sgRNA0573	119	457	209	327	533	226	6	100	20	33	29	0
sgRNA0574	107	113	3	123	80	148	72	15	178	144	148	138
sgRNA0575	53	151	165	162	105	133	32	0	133	251	72	154
sgRNA0576	16	5	9	6	13	11	19	40	18	13	8	14
sgRNA0577	145	95	68	100	55	149	45	104	153	132	79	215
sgRNA0578	81	173	85	130	136	162	201	168	144	181	163	107
sgRNA0579	210	183	107	195	237	187	33	142	237	233	139	131
sgRNA0580	52	190	144	229	123	196	739	38	78	254	64	88
sgRNA0581	0	99	113	106	131	93	0	20	90	188	30	37
sgRNA0582	81	50	228	61	116	127	235	14	66	96	123	180
sgRNA0583	3020	1667	4035	474	2183	371	61	83	136	32	177	29
sgRNA0584	9	48	66	111	82	85	106	139	65	121	53	13
sgRNA0585	69	200	210	192	186	161	61	166	287	228	236	181
sgRNA0586	22	66	11	114	103	123	96	32	185	98	21	23
sgRNA0587	8	6	20	10	9	48	0	61	61	8	50	19
sgRNA0588	182	175	165	147	176	246	640	98	121	161	56	204
sgRNA0589	384	176	194	151	73	162	18	180	83	270	61	104
sgRNA0590	96	80	36	28	30	114	41	12	16	19	0	0
sgRNA0591	110	51	120	68	62	125	41	79	94	158	116	45
sgRNA0592	245	143	54	129	177	162	28	225	119	262	126	109
sgRNA0593	14	138	78	136	202	133	185	32	199	173	156	118
sgRNA0594	234	209	259	213	174	230	123	33	352	249	180	255
sgRNA0595	39	234	428	239	208	294	56	20	135	329	96	129
sgRNA0596	81	247	44	217	166	227	38	65	144	274	251	228
sgRNA0597	15	166	262	208	186	263	9	37	225	312	126	58
sgRNA0598	118	162	91	143	177	128	51	160	56	199	172	39
sgRNA0599	324	338	188	287	175	305	203	159	349	367	150	259
sgRNA0600	0	36	100	51	40	57	124	34	90	81	83	53
sgRNA0601	91	229	61	260	234	249	189	320	99	275	197	152
sgRNA0602	282	263	214	261	402	248	203	127	174	385	130	361
sgRNA0603	300	156	158	112	128	145	141	58	220	224	213	247
sgRNA0604	40	181	44	173	175	237	333	79	209	256	170	107
sgRNA0605	38	126	26	136	121	105	26	0	175	141	80	66
sgRNA0606	99	142	182	69	126	68	34	84	25	38	44	21
sgRNA0607	345	212	228	172	129	122	347	83	319	180	114	232
sgRNA0608	149	199	96	202	151	259	389	561	286	294	248	286
sgRNA0609	72	235	80	206	113	246	39	155	161	236	164	158
sgRNA0610	403	141	108	211	218	202	229	66	290	277	89	137
sgRNA0611	125	59	432	78	64	538	64	32	11	5	0	0
sgRNA0612	30	86	31	178	142	128	26	46	286	168	132	133
sgRNA0613	263	247	320	202	205	263	121	232	143	225	68	161
sgRNA0614	201	138	527	202	127	187	210	145	182	217	88	166
sgRNA0615	115	148	196	176	204	183	588	51	240	289	157	184
sgRNA0616	327	181	54	150	207	188	301	83	147	225	116	144
sgRNA0617	302	247	197	227	236	206	222	138	201	297	245	227
sgRNA0618	0	120	69	150	161	144	230	110	121	183	126	109
sgRNA0619	33	200	249	146	114	176	214	29	146	197	86	169
sgRNA0620	28	85	0	105	119	123	0	249	142	139	179	55
sgRNA0621	0	202	113	156	127	173	141	98	104	178	222	243
sgRNA0622	47	142	27	136	149	134	78	206	79	184	49	192
sgRNA0623	35	460	99	396	445	174	73	27	9	260	378	11
sgRNA0624	194	586	193	469	552	265	183	256	193	491	740	43
sgRNA0625	23	215	131	237	290	230	140	205	106	245	139	253
sgRNA0626	16	163	21	157	214	211	126	255	207	285	210	148
sgRNA0627	77	17	80	25	13	48	27	82	133	35	27	62
sgRNA0628	533	2961	1415	1796	2891	904	23	49	20	145	255	158
sgRNA0629	19	184	50	107	119	160	0	50	3	175	90	183
sgRNA0630	56	198	258	210	152	242	787	90	138	261	210	123
sgRNA0631	170	247	189	232	232	226	70	33	310	284	84	146
sgRNA0632	131	508	444	446	379	398	581	173	303	296	426	404
sgRNA0633	192	359	64	374	488	324	278	367	315	478	412	339
sgRNA0634	0	186	164	163	197	175	0	20	132	284	86	39
sgRNA0635	20	62	131	92	119	89	119	86	112	113	34	71
sgRNA0636	161	175	37	151	125	158	15	130	92	235	146	174
sgRNA0637	169	478	268	462	476	237	370	97	123	487	645	218
sgRNA0638	166	176	193	188	165	195	189	65	114	221	153	310
sgRNA0639	267	249	293	268	149	251	314	80	146	240	244	211
sgRNA0640	104	111	58	90	105	122	102	3	77	192	144	25
sgRNA0641	135	203	116	222	184	180	74	99	128	248	109	96
sgRNA0642	121	158	47	193	145	163	0	103	103	179	128	261
sgRNA0643	5	100	64	175	115	149	0	239	65	195	227	59
sgRNA0644	8	58	199	65	90	127	13	217	2	42	0	67
sgRNA0645	40	150	424	168	79	196	258	242	136	194	156	84
sgRNA0646	213	189	137	169	223	233	179	84	390	247	234	151
sgRNA0647	56	147	45	142	109	157	32	34	135	240	115	138
sgRNA0648	41	65	187	94	122	110	0	0	80	100	63	105
sgRNA0649	0	7	3	2	22	64	0	79	0	3	2	68
sgRNA0650	225	63	17	27	50	43	38	83	16	31	25	0
sgRNA0651	45	130	53	125	110	151	10	0	134	194	32	87
sgRNA0652	111	116	11	133	153	126	47	34	62	236	152	45
sgRNA0653	66	213	274	213	136	163	153	165	82	305	262	92
sgRNA0654	170	237	189	164	284	177	0	9	342	247	167	217
sgRNA0655	65	154	97	164	221	157	159	55	123	201	157	182
sgRNA0656	78	243	401	166	157	198	314	19	220	226	119	35
sgRNA0657	207	242	135	237	186	219	210	72	165	276	197	232
sgRNA0658	248	256	247	223	389	187	276	131	250	557	599	68
sgRNA0659	54	94	26	127	122	132	0	136	259	225	126	118
sgRNA0660	19	107	20	84	66	105	131	394	152	172	82	316
sgRNA0661	125	294	331	327	275	322	139	219	296	337	237	147
sgRNA0662	370	50	121	81	113	148	51	70	66	66	49	120
sgRNA0663	107	154	34	89	91	122	25	23	91	165	34	87
sgRNA0664	21	181	98	135	125	130	225	82	105	177	123	109
sgRNA0665	67	97	63	119	195	149	46	92	16	58	17	0
sgRNA0666	168	72	86	151	105	186	0	108	28	10	1	7
sgRNA0667	117	192	52	145	193	167	39	102	197	226	110	232
sgRNA0668	59	272	399	231	162	262	80	203	132	282	158	239
sgRNA0669	289	205	309	268	225	235	75	107	99	327	189	181
sgRNA0670	25	165	53	146	163	109	31	0	91	153	225	166
sgRNA0671	9	267	192	148	136	193	0	98	182	167	215	153
sgRNA0672	270	220	347	260	325	220	108	33	139	323	198	164
sgRNA0673	179	262	236	170	222	185	0	22	17	32	108	6
sgRNA0674	152	117	143	135	107	129	67	104	127	142	72	149
sgRNA0675	64	314	348	269	237	283	34	47	404	328	193	217
sgRNA0676	248	27	11	25	12	60	166	89	55	35	11	11
sgRNA0677	162	195	228	302	237	272	233	231	185	335	349	225
sgRNA0678	41	167	52	192	217	175	89	115	190	182	143	115
sgRNA0679	42	157	191	303	132	228	51	79	330	262	112	69
sgRNA0680	174	195	411	219	155	259	35	217	271	265	139	188
sgRNA0681	147	182	478	171	211	166	92	81	97	291	16	316
sgRNA0682	29	168	63	136	173	160	83	311	218	246	98	147
sgRNA0683	118	230	175	222	166	255	58	63	119	194	92	91
sgRNA0684	148	174	47	230	168	237	0	30	58	330	198	281
sgRNA0685	22	19	58	9	1	21	65	0	44	14	30	32
sgRNA0686	32	199	312	178	208	257	119	51	182	323	303	162
sgRNA0687	148	158	199	177	127	181	350	268	244	200	150	284
sgRNA0688	43	397	255	285	276	287	614	113	246	472	271	599
sgRNA0689	366	219	183	211	208	254	336	187	268	336	266	293
sgRNA0690	18	152	71	141	120	177	0	53	89	221	96	180
sgRNA0691	98	140	72	136	97	146	85	58	101	206	117	168
sgRNA0692	35	94	40	107	85	112	50	105	43	134	201	143
sgRNA0693	148	190	394	130	177	121	173	39	91	155	203	82
sgRNA0694	264	217	303	224	246	278	510	117	175	327	156	141
sgRNA0695	54	283	253	296	260	327	474	207	372	395	261	371
sgRNA0696	43	236	350	181	206	276	80	175	215	350	195	142
sgRNA0697	31	141	93	205	121	198	275	2	99	272	144	168
sgRNA0698	33	233	205	230	269	235	70	146	256	291	180	576
sgRNA0699	152	85	227	77	91	163	87	94	27	50	114	97
sgRNA0700	116	74	40	47	53	79	26	92	55	30	21	98
sgRNA0701	11	31	67	80	69	85	20	118	21	47	0	0
sgRNA0702	58	14	90	10	10	123	26	11	10	6	0	9
sgRNA0703	176	169	214	167	120	217	192	72	91	254	73	116
sgRNA0704	55	176	180	250	167	143	0	48	134	231	94	72
sgRNA0705	9	22	118	33	29	99	49	112	10	56	46	104
sgRNA0706	100	127	50	101	93	143	0	139	106	117	35	51
sgRNA0707	203	216	185	188	142	236	176	211	38	261	244	168
sgRNA0708	7340	610	3562	206	785	206	2145	3920	1216	107	1411	766
sgRNA0709	0	73	217	102	105	103	9	25	106	126	114	123
sgRNA0710	0	131	22	136	101	118	122	314	133	208	126	94
sgRNA0711	190	285	322	284	219	274	531	116	388	413	118	251
sgRNA0712	9	195	94	231	185	202	397	70	340	377	195	279
sgRNA0713	14	74	204	71	107	110	31	150	54	99	122	69
sgRNA0714	13	185	356	181	169	167	19	277	177	287	214	256
sgRNA0715	23	247	308	231	208	209	328	208	206	339	240	98
sgRNA0716	96	257	165	227	164	201	312	86	211	359	270	238
sgRNA0717	2	138	290	189	227	184	272	101	188	191	136	257
sgRNA0718	67	154	130	218	124	194	138	69	163	257	150	209
sgRNA0719	0	16	10	32	57	51	62	79	20	14	0	57
sgRNA0720	143	178	245	167	219	239	359	58	106	256	231	100
sgRNA0721	50	180	275	225	304	186	56	104	201	296	310	128
sgRNA0722	55	25	55	19	50	76	180	216	34	34	7	30
sgRNA0723	373	163	461	178	268	206	37	228	201	196	134	413
sgRNA0724	78	258	41	184	120	201	60	102	108	280	150	176
sgRNA0725	40	140	437	171	79	186	290	41	188	220	98	75
sgRNA0726	83	194	45	259	186	257	145	211	158	328	228	133
sgRNA0727	64	179	96	234	197	214	0	129	189	241	137	220
sgRNA0728	162	128	248	80	72	176	217	144	57	53	15	0
sgRNA0729	116	239	99	196	167	182	0	97	87	265	180	98
sgRNA0730	73	198	108	215	161	199	67	39	96	205	113	175
sgRNA0731	68	266	207	310	248	292	415	84	271	372	269	112
sgRNA0732	82	180	35	156	106	187	67	95	135	244	240	218
sgRNA0733	138	159	226	214	105	233	128	13	121	255	194	290
sgRNA0734	33	146	375	135	197	190	124	227	277	207	81	461
sgRNA0735	108	91	269	126	158	148	369	46	70	207	75	251
sgRNA0736	102	110	290	131	132	161	79	71	202	185	141	195
sgRNA0737	18	23	52	16	60	33	17	1	22	39	15	15
sgRNA0738	87	173	226	144	233	165	456	13	209	238	72	243
sgRNA0739	11	34	22	47	5	31	62	104	29	26	9	22
sgRNA0740	41	75	245	52	79	150	18	131	73	79	72	145
sgRNA0741	51	257	632	288	265	282	299	321	269	409	339	157
sgRNA0742	137	185	135	156	163	193	74	119	54	231	218	258
sgRNA0743	388	137	73	221	222	221	156	87	155	251	186	226
sgRNA0744	53	149	89	131	173	153	174	156	41	125	109	70
sgRNA0745	262	222	174	183	175	219	308	59	180	277	175	186
sgRNA0746	156	134	488	191	224	241	179	88	109	286	99	161
sgRNA0747	32	170	313	146	236	203	102	157	190	239	107	389
sgRNA0748	106	106	90	101	135	138	58	169	45	163	87	43
sgRNA0749	0	62	0	119	93	64	56	0	59	90	139	184
sgRNA0750	123	105	154	118	116	214	228	123	2	60	0	23
sgRNA0751	0	12	27	10	30	27	24	58	4	9	2	0
sgRNA0752	35	183	245	218	150	169	131	101	104	224	174	206
sgRNA0753	43	239	178	244	211	248	375	168	318	293	150	202
sgRNA0754	131	241	194	226	203	199	147	116	217	211	156	60
sgRNA0755	223	145	279	149	81	144	108	100	148	218	129	238
sgRNA0756	49	26	108	8	33	91	157	120	43	8	16	0
sgRNA0757	22	15	11	48	40	18	0	0	30	0	22	0
sgRNA0758	0	108	164	129	189	157	244	40	39	144	59	4
sgRNA0759	217	136	97	138	216	121	240	138	47	171	103	10
sgRNA0760	121	60	62	58	61	149	82	97	206	108	32	53
sgRNA0761	0	22	98	32	25	74	44	51	58	26	0	160
sgRNA0762	193	282	228	237	274	222	182	336	238	301	357	300
sgRNA0763	0	123	341	119	119	115	129	59	98	172	145	201
sgRNA0764	20	99	181	93	92	105	279	136	272	164	167	188
sgRNA0765	713	68	83	64	85	57	121	72	12	33	59	22
sgRNA0766	151	264	201	215	186	214	0	55	196	232	307	234
sgRNA0767	73	121	123	115	181	179	172	125	357	160	169	128
sgRNA0768	154	206	241	206	219	220	109	143	212	288	276	129
sgRNA0769	69	124	189	128	170	165	41	37	136	188	84	121
sgRNA0770	1	91	0	62	88	99	0	28	79	72	124	58
sgRNA0771	369	99	60	98	116	109	122	37	44	109	110	85
sgRNA0772	207	112	223	64	104	122	84	21	50	64	58	47
sgRNA0773	72	285	74	299	276	226	166	91	398	323	291	317
sgRNA0774	170	274	360	186	228	339	350	121	132	15	0	190
sgRNA0775	117	35	69	47	53	72	98	123	105	51	40	89
sgRNA0776	16	19	20	27	5	35	0	2	7	15	0	54
sgRNA0777	171	68	44	50	87	64	35	56	78	104	49	62
sgRNA0778	201	86	240	146	126	164	22	33	33	72	10	181
sgRNA0779	39	90	49	46	60	56	65	17	13	78	4	86
sgRNA0780	104	13	20	18	22	44	0	0	0	3	0	0
sgRNA0781	929	180	146	117	350	103	223	178	118	91	456	167
sgRNA0782	0	126	308	86	80	126	244	143	136	138	173	99
sgRNA0783	86	42	7	25	13	89	256	97	46	36	36	75
sgRNA0784	61	31	160	31	43	61	43	84	64	23	18	0
sgRNA0785	124	498	374	703	499	674	5	94	13	119	5	23
sgRNA0786	65	154	64	218	221	322	482	89	136	327	234	69
sgRNA0787	0	30	15	102	66	91	68	163	89	90	83	164
sgRNA0788	251	249	130	403	320	298	59	27	77	187	141	114
sgRNA0789	79	253	74	212	251	240	130	111	204	179	142	168
sgRNA0790	668	78	236	89	150	93	254	59	98	12	101	44
sgRNA0791	156	24	23	17	24	40	46	118	54	11	49	27
sgRNA0792	810	312	358	286	365	234	314	199	63	69	58	0
sgRNA0793	131	175	15	157	160	187	30	82	72	201	133	85
sgRNA0794	248	103	66	104	68	98	0	31	21	41	59	32
sgRNA0795	65	163	240	142	122	132	168	35	30	206	27	107
sgRNA0796	141	60	619	27	109	56	58	263	2	0	0	0
sgRNA0797	163	10	194	13	53	25	0	256	0	2	49	0
sgRNA0798	95	419	262	372	421	249	65	68	61	292	333	32
sgRNA0799	87	288	260	293	269	298	271	251	259	358	204	399
sgRNA0800	672	96	246	71	54	126	226	167	250	81	29	168
sgRNA0801	293	85	67	42	60	94	31	118	78	37	86	84
sgRNA0802	7	122	132	107	130	149	171	74	126	122	91	87
sgRNA0803	42	103	186	144	226	205	235	252	107	82	80	11
sgRNA0804	28	82	99	101	56	125	76	70	197	113	69	241
sgRNA0805	44	60	89	62	43	59	58	46	50	96	51	99
sgRNA0806	107	148	175	146	187	141	108	154	15	162	203	293
sgRNA0807	130	31	25	54	39	99	49	27	162	46	6	43
sgRNA0808	579	61	109	10	50	38	159	71	39	3	16	75
sgRNA0809	597	47	139	16	77	53	37	151	16	9	13	42
sgRNA0810	550	41	476	20	73	102	133	8	46	2	5	77
sgRNA0811	85	179	113	205	214	227	167	32	374	266	266	91
sgRNA0812	0	1	0	2	0	7	0	0	0	3	0	24
sgRNA0813	76	2582	375	844	2255	537	96	53	10	39	73	0
sgRNA0814	47	76	64	98	117	82	180	137	88	122	120	90
sgRNA0815	54	74	268	99	82	136	111	52	114	148	50	200
sgRNA0816	33	22	19	9	38	35	0	48	119	10	28	0
sgRNA0817	0	4	0	7	20	16	38	34	0	6	0	0
sgRNA0818	47	15	90	19	39	59	90	68	162	37	28	25
sgRNA0819	321	176	173	128	125	191	264	89	76	176	220	127
sgRNA0820	41	44	54	32	18	43	0	86	11	37	62	0
sgRNA0821	24	80	11	45	45	63	55	82	12	26	29	52
sgRNA0822	23	21	122	34	38	58	16	88	47	11	0	52
sgRNA0823	489	250	240	179	233	297	197	69	62	145	161	130
sgRNA0824	106	76	153	125	155	84	0	35	0	36	25	0
sgRNA0825	5	85	114	76	35	86	50	76	140	113	54	56
sgRNA0826	451	256	30	291	208	199	0	39	179	107	45	255
sgRNA0827	28	176	228	204	235	128	0	35	54	104	56	30
sgRNA0828	471	98	122	92	67	147	36	71	94	106	143	194
sgRNA0829	114	25	46	18	15	34	89	168	16	22	2	0
sgRNA0830	33	107	59	103	92	131	14	56	102	154	52	118
sgRNA0831	75	81	73	98	97	122	28	110	80	96	65	40
sgRNA0832	170	169	69	163	79	188	0	101	27	93	117	95
sgRNA0833	103	160	331	197	159	197	425	56	70	101	71	177
sgRNA0834	281	7	13	2	5	130	0	61	0	8	24	44
sgRNA0835	75	3	143	8	6	116	132	428	0	0	0	65
sgRNA0836	125	147	116	177	160	154	197	278	107	338	63	102
sgRNA0837	62	162	114	231	135	278	482	89	108	196	158	197
sgRNA0838	78	400	72	222	288	213	32	0	10	63	90	18
sgRNA0839	143	133	81	79	133	136	292	115	159	98	92	387
sgRNA0840	0	53	42	59	54	84	0	49	56	29	0	88
sgRNA0841	69	37	93	43	10	52	2	13	32	24	3	0
sgRNA0842	195	438	367	577	323	436	131	30	99	367	130	112
sgRNA0843	332	211	31	295	213	192	0	31	54	203	93	71
sgRNA0844	306	200	108	169	197	170	103	37	120	227	155	122
sgRNA0845	63	186	140	140	182	158	169	41	213	222	198	249
sgRNA0846	0	146	153	239	249	222	288	158	229	279	132	245
sgRNA0847	91	229	213	176	152	195	128	137	207	257	154	265
sgRNA0848	41	103	22	121	131	178	61	76	160	175	65	179
sgRNA0849	18	213	310	327	233	294	304	164	208	415	181	180
sgRNA0850	95	418	430	417	396	445	395	185	578	607	357	466
sgRNA0851	170	144	10	123	132	137	189	98	121	154	35	129
sgRNA0852	0	11	85	10	8	12	0	21	19	4	0	24
sgRNA0853	64	6	16	2	10	13	55	0	22	11	4	0
sgRNA0854	116	147	43	165	114	213	260	32	318	269	298	79
sgRNA0855	220	239	274	333	204	325	257	262	220	368	208	298
sgRNA0856	44	186	60	119	146	171	91	7	248	186	196	121
sgRNA0857	303	199	165	265	184	244	247	133	251	345	149	263
sgRNA0858	24	103	35	161	169	100	216	33	162	222	96	50
sgRNA0859	52	107	174	84	66	55	0	93	15	44	42	0
sgRNA0860	324	92	351	26	23	320	143	353	200	8	20	8
sgRNA0861	100	46	125	21	29	30	15	173	72	8	16	0
sgRNA0862	11	33	111	7	11	71	30	25	0	4	0	0
sgRNA0863	103	183	85	280	257	270	222	50	176	356	270	232
sgRNA0864	63	58	163	60	65	44	227	70	0	30	34	5
sgRNA0865	63	157	169	152	84	128	19	30	142	177	90	19
sgRNA0866	249	28	0	16	14	76	0	33	151	24	28	111
sgRNA0868	68	100	47	128	78	133	48	55	38	121	84	16
sgRNA0869	0	71	12	75	58	78	0	75	173	97	108	12
sgRNA0870	44	111	26	110	173	164	29	220	62	158	77	93
sgRNA0871	51	203	0	183	88	177	513	26	160	190	138	351
sgRNA0872	206	377	406	513	285	399	103	25	100	37	79	13
sgRNA0873	108	184	171	221	112	263	474	44	153	321	51	192
sgRNA0874	188	126	74	99	92	105	0	34	26	161	29	7
sgRNA0875	233	104	181	152	152	175	49	141	270	187	173	217
sgRNA0876	117	198	229	208	171	199	286	54	37	257	141	129
sgRNA0877	230	272	24	327	323	292	185	318	133	410	183	294
sgRNA0878	55	157	306	200	100	163	439	59	272	274	159	178
sgRNA0879	110	153	132	118	181	125	239	60	182	223	155	33
sgRNA0880	16	134	116	164	148	120	130	47	140	195	40	66
sgRNA0881	35	129	274	138	144	160	499	247	41	235	138	135
sgRNA0882	0	136	46	146	138	161	0	90	196	209	101	100
sgRNA0883	38	135	10	132	142	146	207	94	362	187	79	130
sgRNA0884	0	73	54	54	42	55	0	0	63	72	23	17
sgRNA0885	168	124	102	71	115	132	377	109	102	151	132	56
sgRNA0886	0	168	60	216	186	207	171	212	189	276	99	270
sgRNA0887	228	185	85	180	389	241	370	268	270	335	224	228
sgRNA0888	105	205	101	221	306	262	283	604	258	312	321	209
sgRNA0889	252	222	231	259	255	250	273	111	228	320	144	312
sgRNA0890	194	169	60	157	107	136	129	57	55	199	131	249
sgRNA0891	120	67	10	39	61	88	0	32	128	88	42	65
sgRNA0892	14	28	0	33	53	80	111	84	204	49	7	237
sgRNA0893	0	126	145	146	121	136	191	0	11	197	69	87
sgRNA0894	0	123	69	157	85	156	261	210	169	221	129	249
sgRNA0895	0	107	90	115	101	128	209	128	27	149	112	62
sgRNA0896	128	147	160	147	239	167	118	104	190	223	89	106
sgRNA0897	0	144	0	106	85	113	37	196	97	148	147	139
sgRNA0898	182	135	246	103	167	124	203	0	180	152	125	215
sgRNA0899	115	234	298	338	235	368	134	139	171	70	43	85
sgRNA0900	0	30	64	49	54	66	82	57	48	87	16	22
sgRNA0901	94	45	14	84	149	78	44	34	0	92	33	74
sgRNA0902	20	62	136	117	102	98	44	0	18	149	80	0
sgRNA0903	322	156	159	131	150	202	166	141	198	212	197	189
sgRNA0904	43	95	49	84	74	113	139	0	239	117	30	22
sgRNA0905	37	193	153	206	171	184	125	58	127	202	225	54
sgRNA0906	183	87	39	97	133	132	93	121	143	169	102	145
sgRNA0907	183	131	66	163	109	119	40	35	102	180	125	142
sgRNA0908	136	205	113	188	207	155	116	116	108	214	180	89
sgRNA0909	27	121	29	69	105	112	77	136	110	128	54	92
sgRNA0910	20	103	32	133	83	153	93	223	101	189	467	178
sgRNA0911	292	198	125	201	204	181	417	103	0	225	184	196
sgRNA0912	52	92	170	100	96	116	148	31	147	153	155	68
sgRNA0913	648	114	69	156	99	145	112	73	184	178	164	132
sgRNA0914	27	33	69	33	4	55	0	22	0	36	8	126
sgRNA0915	56	142	107	132	108	216	147	38	64	214	135	132
sgRNA0916	0	89	137	145	114	122	33	34	104	193	156	96
sgRNA0917	29	111	146	101	160	130	339	110	105	169	100	180
sgRNA0918	135	112	133	153	102	149	218	30	155	238	112	74
sgRNA0919	142	35	69	51	37	53	10	0	37	79	100	46
sgRNA0920	77	79	141	86	77	118	32	84	81	128	92	92
sgRNA0921	53	153	144	129	172	117	32	130	90	185	181	131
sgRNA0922	210	239	142	223	215	214	26	229	235	242	121	184
sgRNA0923	65	174	0	95	92	94	74	16	205	150	75	102
sgRNA0924	142	209	44	219	113	197	148	76	71	268	157	203
sgRNA0925	16	94	180	133	147	113	235	34	239	121	106	78
sgRNA0926	94	70	23	116	90	119	123	17	64	185	57	111
sgRNA0927	42	172	207	187	192	132	179	61	82	211	137	118
sgRNA0928	15	190	87	181	138	137	20	43	151	219	177	256
sgRNA0929	151	98	158	107	106	156	218	52	147	202	77	106
sgRNA0930	83	270	70	226	290	286	229	129	129	256	111	194
sgRNA0931	698	297	196	434	242	316	160	0	98	92	59	25
sgRNA0932	197	215	366	349	197	247	49	26	10	65	85	27
sgRNA0933	146	207	154	207	153	235	113	109	95	219	210	215
sgRNA0934	0	101	0	108	128	124	25	47	195	151	101	75
sgRNA0935	211	218	122	188	181	215	215	35	95	281	100	347
sgRNA0936	21	185	64	229	139	222	378	10	173	257	163	183
sgRNA0937	225	96	143	70	91	103	168	15	46	155	93	124
sgRNA0938	18	73	82	168	79	125	0	41	85	172	137	158
sgRNA0939	0	99	164	72	99	86	68	90	153	103	41	57
sgRNA0940	402	108	260	123	112	159	144	164	292	196	113	54
sgRNA0941	0	92	0	114	54	119	71	67	116	109	90	118
sgRNA0942	13	178	175	159	166	168	0	94	181	216	130	176
sgRNA0943	189	559	154	398	463	274	0	29	32	187	175	76
sgRNA0944	20	67	107	93	80	117	15	104	0	105	154	180
sgRNA0945	68	117	132	178	108	118	0	0	129	241	178	21
sgRNA0946	0	112	168	158	146	143	201	0	45	175	199	326
sgRNA0947	81	52	0	58	83	71	107	48	7	124	79	94
sgRNA0948	176	57	0	90	59	78	11	0	96	108	119	136
sgRNA0949	93	54	51	44	38	45	0	0	88	44	60	91
sgRNA0950	30	227	145	340	270	232	41	105	224	312	202	218
sgRNA0951	23	186	105	203	184	221	104	210	161	285	164	159
sgRNA0952	37	204	377	235	271	254	0	142	158	216	185	176
sgRNA0953	42	157	193	123	90	173	185	20	19	121	17	98
sgRNA0954	83	210	61	197	218	130	168	203	161	248	224	161
sgRNA0955	47	70	73	97	90	105	34	44	43	129	199	199
sgRNA0956	304	86	73	118	74	87	369	36	39	149	136	96
sgRNA0957	26	95	32	56	79	66	73	39	21	102	16	37
sgRNA0958	29	79	185	122	133	176	82	86	77	180	146	91
sgRNA0959	0	96	357	146	214	164	0	202	163	209	157	140
sgRNA0960	100	202	414	151	129	178	36	110	238	220	128	132
sgRNA0961	188	163	61	134	198	190	143	0	108	176	107	210
sgRNA0962	0	147	36	139	76	90	98	19	74	158	65	94
sgRNA0963	159	61	9	71	49	99	197	165	60	137	213	16
sgRNA0964	20	73	84	112	109	108	0	26	218	152	40	81
sgRNA0965	0	46	86	38	147	105	261	20	43	164	106	98
sgRNA0966	0	7	36	37	31	47	74	173	23	19	0	11
sgRNA0967	442	249	116	270	184	288	209	64	159	329	88	168
sgRNA0968	81	162	225	227	144	214	37	15	133	217	124	109
sgRNA0969	47	213	177	167	187	185	185	106	186	300	253	108
sgRNA0970	52	62	19	101	40	84	52	91	115	107	42	57
sgRNA0971	211	178	222	200	134	177	209	70	89	207	130	97
sgRNA0972	63	174	344	204	208	278	135	11	360	247	281	322
sgRNA0973	104	286	112	346	256	262	301	69	327	368	194	140
sgRNA0974	51	210	46	183	150	209	169	341	227	251	211	186
sgRNA0975	8	93	58	82	93	93	37	0	157	112	80	51
sgRNA0976	42	73	22	101	61	62	56	211	81	79	127	161
sgRNA0977	75	170	14	130	80	178	39	118	172	226	210	207
sgRNA0978	11	245	228	233	288	199	203	388	148	225	98	498
sgRNA0979	98	202	36	206	125	160	25	83	156	200	124	260
sgRNA0980	14	220	185	218	321	186	250	112	234	249	79	408
sgRNA0981	129	165	250	210	156	206	328	163	203	266	142	385
sgRNA0982	199	129	107	143	105	106	72	192	109	152	37	88
sgRNA0983	191	102	88	137	118	158	231	51	160	166	105	173
sgRNA0984	20	133	156	175	184	154	207	264	213	205	171	183
sgRNA0985	108	152	190	266	170	251	221	46	89	249	181	160
sgRNA0986	105	195	162	207	192	145	0	21	219	191	156	92
sgRNA0987	337	154	76	141	111	132	53	0	183	123	40	30
sgRNA0988	61	143	72	86	94	122	264	97	95	181	147	104
sgRNA0989	40	94	474	72	73	100	88	41	129	133	83	68
sgRNA0990	30	124	15	111	107	122	136	0	232	177	104	81
sgRNA0991	67	31	277	65	48	62	12	31	83	55	67	36
sgRNA0992	0	103	44	84	62	97	59	68	67	137	198	98
sgRNA0993	43	72	59	100	84	98	121	28	65	101	85	0
sgRNA0994	237	211	100	299	204	218	140	90	269	255	153	524
sgRNA0995	67	100	37	99	70	133	173	104	69	196	116	84
sgRNA0996	148	55	46	68	41	79	0	27	22	69	37	0
sgRNA0997	36	161	11	144	82	144	114	45	25	190	172	98
sgRNA0998	91	111	95	162	116	189	72	16	238	233	266	87
sgRNA0999	105	206	590	318	243	247	83	214	163	316	219	319
sgRNA1000	62	123	18	141	125	109	188	32	282	199	113	115
sgRNA1001	0	64	161	112	80	130	102	27	211	110	82	249
sgRNA1002	84	115	93	215	139	173	129	222	132	199	78	408
sgRNA1003	188	185	219	154	257	180	77	62	59	240	92	65
sgRNA1004	0	183	133	173	167	130	96	62	99	198	108	292
sgRNA1005	25	209	59	191	186	274	499	159	205	372	198	348
sgRNA1006	64	201	281	210	275	177	0	211	90	291	220	76
sgRNA1007	0	139	33	179	156	198	13	0	168	238	166	436
sgRNA1008	48	181	23	196	220	182	220	53	178	232	201	174
sgRNA1009	108	220	82	232	188	224	89	84	264	296	128	373
sgRNA1010	91	216	74	264	122	201	494	253	203	288	152	106
sgRNA1011	11	121	124	169	140	125	333	54	136	231	183	143
sgRNA1012	139	113	259	141	140	109	8	46	70	167	151	36
sgRNA1013	151	295	172	239	181	262	242	114	240	320	146	431
sgRNA1014	20	89	189	167	172	127	2	106	180	184	114	109
sgRNA1015	27	186	110	169	282	200	342	132	239	267	208	40
sgRNA1016	18	133	179	194	255	195	206	100	82	253	229	91
sgRNA1017	0	39	3	58	29	38	0	173	93	56	10	9
sgRNA1018	56	161	8	237	237	168	132	49	173	309	113	347
sgRNA1019	251	1776	136	1272	1353	1401	0	117	0	4	9	0
sgRNA1020	164	253	47	160	140	218	284	192	125	228	182	282
sgRNA1021	84	259	59	306	217	332	90	74	201	439	312	492
sgRNA1022	211	137	4	172	169	177	34	70	105	232	138	114
sgRNA1023	0	218	142	270	146	192	247	41	126	290	84	194
sgRNA1024	579	232	170	190	205	203	274	121	218	264	180	121
sgRNA1025	169	95	196	134	159	180	0	72	190	136	111	169
sgRNA1026	23	70	37	77	82	112	95	14	74	82	11	33
sgRNA1027	120	90	213	33	42	63	195	98	66	56	31	50
sgRNA1028	10	57	109	58	41	85	126	30	63	72	73	194
sgRNA1029	281	51	88	54	59	56	215	59	31	25	71	71
sgRNA1030	7	27	49	14	45	42	0	55	57	26	1	0
sgRNA1031	0	168	146	208	105	144	446	58	301	246	168	196
sgRNA1032	0	140	8	86	168	187	18	30	28	187	79	18
sgRNA1033	138	238	149	300	300	253	231	99	147	312	145	243
sgRNA1034	49	152	35	118	120	184	95	44	113	203	171	133
sgRNA1035	96	90	225	97	63	116	188	65	46	156	98	140
sgRNA1036	184	212	83	204	211	198	109	47	112	251	188	229
sgRNA1037	2	220	124	167	155	137	88	33	157	219	92	73
sgRNA1038	255	155	98	260	167	197	195	80	225	288	184	98
sgRNA1039	28	101	59	104	73	114	275	38	16	106	28	157
sgRNA1040	109	204	145	242	208	218	0	126	355	239	83	434
sgRNA1041	209	183	23	168	150	130	191	187	170	203	182	225
sgRNA1042	0	162	182	166	191	141	76	43	114	187	196	8
sgRNA1043	0	156	54	162	130	167	188	262	53	204	176	215
sgRNA1044	47	192	94	182	230	164	243	276	53	293	142	228
sgRNA1045	128	303	103	297	318	236	185	110	254	354	84	105
sgRNA1046	100	229	131	279	191	285	359	111	76	353	150	384
sgRNA1047	102	200	56	285	166	188	238	138	114	297	175	222
sgRNA1048	272	114	86	174	177	146	15	80	142	189	87	202
sgRNA1049	0	106	92	137	119	196	136	80	153	188	205	369
sgRNA1050	112	267	279	334	189	316	295	18	224	402	271	267
sgRNA1051	174	74	85	48	59	49	83	35	30	26	34	21
sgRNA1052	40	245	71	314	226	256	288	58	191	208	237	177
sgRNA1053	219	341	276	343	428	368	187	87	547	425	266	547
sgRNA1054	148	183	138	185	122	225	0	174	152	291	166	204
sgRNA1055	12	55	114	86	61	111	300	82	60	138	19	177
sgRNA1056	23	199	125	192	149	235	350	54	212	269	71	128
sgRNA1057	60	125	14	194	129	146	147	102	229	248	83	185
sgRNA1058	211	57	163	31	54	84	0	175	0	9	0	36
sgRNA1059	38	165	72	159	65	168	24	205	147	213	152	331
sgRNA1060	21	242	75	122	218	103	139	117	135	108	213	47
sgRNA1061	209	243	7	168	210	172	113	124	42	116	235	24
sgRNA1062	19	193	59	127	128	152	343	72	113	151	117	34
sgRNA1063	20	119	28	128	118	98	93	17	234	101	101	94
sgRNA1064	230	71	65	75	81	74	16	81	95	82	26	160
sgRNA1065	0	107	37	147	72	144	162	21	333	124	131	111
sgRNA1066	46	165	49	155	136	192	154	65	113	206	90	61
sgRNA1067	46	65	92	79	35	110	292	109	272	99	83	331
sgRNA1068	11	167	58	190	181	180	20	0	81	208	136	446
sgRNA1069	41	159	109	163	145	209	51	171	250	288	212	102
sgRNA1070	128	95	23	85	59	172	107	56	119	58	55	154
sgRNA1071	15	48	116	28	28	80	111	0	16	47	11	14
sgRNA1072	0	78	10	123	95	109	0	29	24	45	23	0
sgRNA1073	177	250	641	345	372	418	310	82	188	277	99	126
sgRNA1074	466	362	458	668	325	674	80	55	132	241	72	116
sgRNA1075	22	122	9	160	152	180	130	62	25	78	12	57
sgRNA1076	306	190	152	167	205	200	124	57	132	199	97	0
sgRNA1077	51	32	45	49	51	45	129	41	100	58	55	77
sgRNA1078	0	171	157	152	202	157	177	229	48	253	100	76
sgRNA1079	97	100	47	122	90	160	64	62	90	170	79	184
sgRNA1080	82	133	185	197	99	144	0	118	196	205	194	207
sgRNA1081	21	142	103	94	94	124	86	57	137	186	88	221
sgRNA1082	114	122	86	185	223	145	84	51	203	206	185	207
sgRNA1083	82	182	273	194	91	135	187	85	138	231	51	139
sgRNA1084	24	134	108	147	122	156	160	100	95	217	145	71
sgRNA1085	0	129	52	148	93	121	70	225	131	164	138	69
sgRNA1086	0	26	25	19	34	24	0	0	4	47	11	14
sgRNA1087	18	100	202	84	135	82	0	48	70	143	82	133
sgRNA1088	13	136	62	87	119	104	39	37	177	119	67	39
sgRNA1089	230	164	251	219	284	249	270	154	136	364	129	442
sgRNA1090	198	258	144	221	237	227	392	34	248	311	248	287
sgRNA1091	184	120	183	159	154	137	125	92	111	171	163	91
sgRNA1092	192	122	234	148	110	142	106	79	69	137	99	140
sgRNA1093	34	43	154	112	42	55	73	149	60	104	51	99
sgRNA1094	1360	188	481	104	249	56	1301	365	109	80	247	48
sgRNA1095	0	120	309	120	196	148	118	129	91	150	81	126
sgRNA1096	65	146	27	216	214	177	150	55	40	241	38	26
sgRNA1097	278	94	84	107	86	102	14	43	222	100	64	86
sgRNA1098	76	102	152	162	187	172	0	221	112	166	114	163
sgRNA1099	374	133	185	168	156	145	210	168	195	190	58	155
sgRNA1100	42	165	168	140	203	182	81	49	37	268	202	226
sgRNA1101	50	202	51	200	229	189	73	98	136	311	172	173
sgRNA1102	186	160	1	206	183	214	189	39	104	286	93	160
sgRNA1103	94	157	242	152	230	189	145	74	153	212	108	113
sgRNA1104	0	60	27	65	55	90	0	0	44	92	51	152
sgRNA1105	2	55	2	72	69	64	0	56	65	76	41	55
sgRNA1106	141	268	117	254	154	276	71	68	125	261	232	372
sgRNA1107	260	98	264	161	152	160	250	47	120	185	151	81
sgRNA1108	27	177	236	238	213	203	48	218	174	260	252	84
sgRNA1109	0	145	195	128	132	114	0	33	135	171	162	138
sgRNA1110	83	151	22	250	148	199	55	197	100	227	222	196
sgRNA1111	143	174	157	185	164	162	121	55	191	178	270	281
sgRNA1112	68	114	20	127	83	156	41	37	56	145	104	47
sgRNA1113	0	75	45	90	59	105	0	32	102	126	56	74
sgRNA1114	118	135	134	104	115	137	115	19	134	187	169	120
sgRNA1115	144	135	61	168	118	78	68	80	57	135	102	34
sgRNA1116	14	100	6	106	105	90	0	2	190	160	138	143
sgRNA1117	0	230	200	252	320	196	218	240	204	280	215	180
sgRNA1118	51	132	104	161	136	168	72	83	146	235	126	170
sgRNA1119	0	162	111	197	144	175	120	82	201	214	167	222
sgRNA1120	19	119	178	153	140	120	202	103	144	210	69	207
sgRNA1121	27	40	3	27	7	31	159	24	23	62	0	107
sgRNA1122	44	127	170	151	95	166	377	129	87	91	72	74
sgRNA1123	66	58	47	48	145	74	0	51	33	70	32	5
sgRNA1124	139	56	97	73	87	64	0	27	114	86	78	35
sgRNA1125	160	125	488	133	119	151	141	39	86	242	83	267
sgRNA1126	129	137	37	172	273	201	703	149	280	244	287	351
sgRNA1127	256	250	344	292	165	347	42	67	210	259	208	6
sgRNA1128	0	16	74	35	16	16	0	58	47	55	141	71
sgRNA1129	188	176	275	152	146	189	181	77	175	283	80	157
sgRNA1130	29	66	183	99	89	82	26	72	87	131	90	149
sgRNA1131	176	166	84	146	156	181	0	98	114	103	22	46
sgRNA1132	124	157	12	155	144	169	30	23	73	134	85	24
sgRNA1133	85	151	243	114	110	157	49	158	118	186	106	64
sgRNA1134	39	261	360	210	284	277	194	203	126	339	112	30
sgRNA1135	24	102	213	126	163	121	169	211	205	150	85	13
sgRNA1136	26	208	147	127	129	110	66	59	209	192	195	95
sgRNA1137	338	183	105	139	211	194	57	174	187	224	217	186
sgRNA1138	191	183	304	294	220	285	368	202	120	281	176	243
sgRNA1139	223	219	257	183	153	233	65	58	28	239	178	84
sgRNA1140	20	180	83	133	139	161	247	114	235	196	80	77
sgRNA1141	0	90	114	144	76	116	17	95	93	192	177	57
sgRNA1142	328	433	97	416	421	268	168	22	12	223	173	199
sgRNA1143	30	104	39	110	94	111	71	124	68	162	86	0
sgRNA1144	53	189	108	271	193	204	302	189	292	326	196	119
sgRNA1145	79	136	128	154	153	146	47	56	137	232	126	135
sgRNA1146	129	241	158	337	271	276	300	100	299	315	223	93
sgRNA1147	14	132	65	212	103	204	92	19	198	271	113	339
sgRNA1148	23	140	42	182	177	165	0	13	166	214	180	179
sgRNA1149	189	106	190	147	93	123	45	125	101	140	105	164
sgRNA1150	0	101	119	125	167	114	223	136	88	159	59	119
sgRNA1151	86	94	67	166	202	144	569	172	77	184	85	134
sgRNA1152	198	152	148	127	119	165	43	151	122	195	170	176
sgRNA1153	217	213	161	208	138	225	96	82	252	249	264	215
sgRNA1154	0	162	44	217	151	230	105	98	235	269	87	168
sgRNA1155	61	92	196	120	76	138	204	34	100	173	99	61
sgRNA1156	14	113	31	101	146	118	0	70	61	156	36	123
sgRNA1157	26	155	315	107	115	152	29	137	238	198	209	198
sgRNA1158	125	98	114	125	124	116	74	70	118	133	101	149
sgRNA1159	0	77	287	76	119	69	78	33	100	90	26	98
sgRNA1160	0	197	17	211	222	212	105	181	266	272	250	55
sgRNA1161	37	57	6	60	20	68	211	40	38	91	37	87
sgRNA1162	169	147	137	184	190	155	179	39	288	172	251	171
sgRNA1163	8	165	73	157	161	141	0	49	85	211	348	345
sgRNA1164	30	99	314	142	103	156	213	157	154	163	212	111
sgRNA1165	446	208	110	230	158	228	141	140	203	260	286	83
sgRNA1166	28	72	145	54	64	84	87	22	51	102	114	243
sgRNA1167	388	188	95	208	255	197	91	196	182	208	124	186
sgRNA1168	148	154	69	233	246	212	0	74	137	175	143	245
sgRNA1169	6	95	13	121	63	135	145	37	135	93	50	126
sgRNA1170	150	247	196	292	173	289	156	242	376	304	118	218
sgRNA1171	72	78	16	103	41	109	0	5	101	66	32	64
sgRNA1172	31	105	54	127	86	139	79	175	112	90	54	26
sgRNA1173	0	76	159	134	101	108	129	51	121	154	105	205
sgRNA1174	0	99	86	116	160	178	257	83	135	168	108	20
sgRNA1175	146	134	333	180	214	172	224	73	268	187	182	38
sgRNA1176	9	24	11	20	25	18	0	44	0	23	38	30
sgRNA1177	0	171	31	160	167	179	152	36	205	260	189	52
sgRNA1178	100	71	66	188	117	124	232	63	110	203	123	163
sgRNA1179	58	77	111	112	113	86	0	86	132	145	73	136
sgRNA1180	41	79	0	112	94	148	33	127	90	167	32	89
sgRNA1181	64	61	69	70	30	75	136	16	123	61	46	156
sgRNA1182	23	134	58	161	163	118	103	71	186	203	109	27
sgRNA1183	2	151	180	91	53	136	131	65	113	116	21	102
sgRNA1184	17	188	51	198	117	195	122	244	109	204	183	19
sgRNA1185	0	55	9	80	37	64	71	10	137	69	31	52
sgRNA1186	0	108	47	116	148	129	14	51	168	165	85	76
sgRNA1187	154	106	91	127	75	85	73	74	155	167	281	70
sgRNA1188	44	95	28	121	137	127	30	50	119	144	68	147
sgRNA1189	76	251	161	194	236	242	170	165	192	275	197	183
sgRNA1190	82	123	138	147	73	132	96	71	107	223	199	189
sgRNA1191	143	139	0	142	106	125	196	17	74	167	107	178
sgRNA1192	315	165	209	138	82	142	56	198	167	207	71	165
sgRNA1193	30	160	74	175	213	177	331	109	380	234	78	315
sgRNA1194	385	168	75	133	126	173	0	34	168	192	194	253
sgRNA1195	41	160	36	210	216	251	168	145	196	297	268	256
sgRNA1196	10	113	50	136	127	113	18	0	144	139	77	96
sgRNA1197	167	150	78	220	196	158	179	111	75	215	201	132
sgRNA1198	36	136	168	176	59	131	46	86	105	144	54	240
sgRNA1199	356	96	101	134	96	131	31	50	148	207	76	74
sgRNA1200	70	259	76	290	196	307	434	213	197	275	231	132
sgRNA1201	206	321	272	379	250	393	264	178	262	465	403	170
sgRNA1202	54	301	56	280	256	258	323	53	59	364	277	181
sgRNA1203	35	79	0	87	52	109	39	84	131	93	66	56
sgRNA1204	11	149	94	131	80	119	107	0	113	163	51	87
sgRNA1205	62	277	589	346	306	339	514	44	150	418	452	419
sgRNA1206	134	111	199	90	87	76	54	29	58	136	13	215
sgRNA1207	341	146	237	193	172	261	295	331	213	250	221	171
sgRNA1208	33	107	149	120	130	140	159	0	207	172	30	139
sgRNA1209	0	166	88	135	71	111	83	51	116	191	192	58
sgRNA1210	0	150	383	117	158	145	56	177	124	169	79	117
sgRNA1211	91	198	280	248	94	197	230	174	49	254	133	234
sgRNA1212	253	87	44	92	137	86	126	241	178	163	240	142
sgRNA1213	0	86	147	105	107	91	0	0	159	145	90	54
sgRNA1214	39	145	52	107	98	88	0	0	103	125	55	28
sgRNA1215	156	191	28	115	47	100	115	0	81	143	22	12
sgRNA1216	65	6	10	16	16	19	18	0	13	11	0	2
sgRNA1217	113	207	7	159	195	170	0	127	59	218	9	163
sgRNA1218	17	118	6	165	138	170	134	152	155	211	245	234
sgRNA1219	0	34	50	1	23	30	87	0	10	1	11	31
sgRNA1220	0	87	115	86	36	63	35	21	67	75	39	42
sgRNA1221	74	51	16	83	56	83	82	17	3	98	54	76
sgRNA1222	95	71	44	44	66	130	163	134	98	81	38	109
sgRNA1223	9	165	226	198	180	129	554	101	99	205	193	213
sgRNA1224	42	45	0	46	14	63	71	30	37	51	27	148
sgRNA1225	18	92	84	82	39	105	32	60	281	134	103	91
sgRNA1226	130	203	26	192	209	235	310	135	177	251	310	305
sgRNA1227	20	214	159	187	156	168	194	9	167	203	135	120
sgRNA1228	0	74	15	83	63	80	96	0	32	82	19	109
sgRNA1229	33	164	63	133	136	199	391	241	143	254	73	186
sgRNA1230	0	202	29	247	199	203	0	131	183	249	99	52
sgRNA1231	41	94	85	102	129	146	0	69	32	186	90	327
sgRNA1232	33	80	31	84	109	82	189	0	67	107	38	204
sgRNA1233	98	107	61	129	104	131	0	38	79	185	67	81
sgRNA1234	24	70	10	96	67	84	41	67	23	111	93	52
sgRNA1235	70	126	62	116	80	75	0	37	123	102	148	178
sgRNA1236	122	23	248	42	44	70	0	21	0	9	0	0
sgRNA1237	0	74	113	40	100	116	35	166	14	16	22	0
sgRNA1238	8	30	7	30	45	40	40	14	6	2	4	20
sgRNA1239	16	214	178	340	187	199	378	0	296	253	323	69
sgRNA1240	5	107	41	94	63	62	75	125	59	115	52	73
sgRNA1241	179	246	349	265	204	237	113	151	142	291	213	173
sgRNA1242	0	233	38	184	137	169	119	40	151	246	174	0
sgRNA1243	105	209	173	350	270	356	273	144	236	475	171	305
sgRNA1244	13	214	533	231	191	202	189	87	204	288	191	204
sgRNA1245	86	94	206	126	246	126	0	94	206	141	47	126
sgRNA1246	33	163	94	230	387	213	239	51	140	283	230	336
sgRNA1247	257	103	111	86	115	86	159	114	135	87	15	103
sgRNA1248	17	90	15	122	82	94	0	56	25	179	94	292
sgRNA1249	0	64	226	93	36	51	175	22	23	89	77	160
sgRNA1250	75	176	33	154	76	171	75	21	166	248	159	171
sgRNA1251	162	167	47	165	157	191	105	0	84	281	142	202
sgRNA1252	0	46	16	40	55	25	0	36	31	57	42	19
sgRNA1253	25	179	36	224	210	205	304	64	197	312	184	274
sgRNA1254	83	218	287	146	105	166	65	132	172	280	69	86
sgRNA1255	49	138	185	193	186	148	154	73	125	212	139	158
sgRNA1256	9	212	173	235	231	188	17	171	55	206	292	241
sgRNA1257	107	249	8	312	291	179	194	192	130	177	46	15
sgRNA1258	133	104	36	184	129	94	30	36	38	60	20	22
sgRNA1259	217	208	37	179	189	240	178	243	152	247	199	180
sgRNA1260	65	99	93	102	104	108	189	62	138	135	126	107
sgRNA1261	59	155	147	220	132	219	117	85	222	234	197	155
sgRNA1262	183	298	279	361	238	286	325	294	267	401	320	211
sgRNA1263	405	254	266	229	150	240	109	287	174	340	246	218
sgRNA1264	15	25	14	31	34	47	0	79	22	27	0	7
sgRNA1265	167	319	148	342	216	315	48	170	327	429	241	281
sgRNA1266	10	78	39	69	100	53	90	73	63	90	12	98
sgRNA1267	263	156	235	258	190	261	132	206	130	302	251	144
sgRNA1268	125	195	217	279	221	229	46	166	59	294	219	301
sgRNA1269	82	181	51	159	129	163	505	71	242	206	82	157
sgRNA1270	102	125	86	115	87	213	605	104	202	183	150	113
sgRNA1271	32	62	52	75	44	69	63	127	54	76	88	84
sgRNA1272	103	172	137	112	107	195	207	32	181	205	101	292
sgRNA1273	75	163	34	179	155	136	188	85	330	224	70	287
sgRNA1274	90	146	88	189	136	187	43	98	125	241	166	182
sgRNA1275	149	126	115	170	173	123	62	40	271	180	109	180
sgRNA1276	171	291	262	323	266	290	362	174	438	425	248	265
sgRNA1277	21	114	121	165	183	186	154	128	249	210	76	182
sgRNA1278	258	175	271	200	232	219	562	108	392	304	194	211
sgRNA1279	0	155	70	191	182	170	57	48	143	254	161	209
sgRNA1280	23	103	273	161	141	200	51	100	151	226	191	287
sgRNA1281	0	144	68	221	161	188	122	145	52	222	65	343
sgRNA1282	56	122	21	147	108	138	298	69	90	172	197	62
sgRNA1283	148	147	80	93	124	134	124	209	33	198	310	102
sgRNA1284	43	139	154	127	156	113	235	97	38	181	177	195
sgRNA1285	671	203	35	187	253	251	67	33	193	221	238	279
sgRNA1286	2	226	204	308	284	213	267	255	128	300	182	167
sgRNA1287	38	162	184	102	216	146	25	96	218	210	55	115
sgRNA1288	308	148	39	110	117	115	73	341	156	196	44	82
sgRNA1289	0	110	96	146	79	107	55	46	138	144	87	77
sgRNA1290	0	6	0	19	14	64	0	22	93	23	56	27
sgRNA1291	31	85	15	163	209	158	113	79	175	172	105	230
sgRNA1292	89	331	317	268	292	340	245	66	258	464	155	319
sgRNA1293	466	175	185	280	291	227	74	205	211	269	130	243
sgRNA1294	79	216	244	298	75	368	328	113	122	179	223	226
sgRNA1295	161	233	168	233	290	272	178	292	186	142	134	153
sgRNA1296	252	170	112	230	156	183	26	125	197	269	340	257
sgRNA1297	0	17	40	28	12	51	88	0	52	52	63	95
sgRNA1298	154	44	80	48	42	75	147	30	198	74	81	185
sgRNA1299	17	23	19	8	7	36	66	18	64	36	23	37
sgRNA1300	0	28	12	29	17	74	283	114	61	54	19	85
sgRNA1301	68	150	146	113	101	108	155	79	113	137	268	32
sgRNA1302	22	56	10	84	27	137	141	121	122	111	85	39
sgRNA1303	6	159	103	207	179	207	93	69	142	286	154	327
sgRNA1304	135	136	292	218	261	222	114	26	235	284	181	161
sgRNA1305	24	199	155	230	219	239	393	56	275	197	99	175
sgRNA1306	26	56	222	111	97	80	47	34	56	123	87	154
sgRNA1307	9	34	43	53	62	40	0	44	0	14	0	0
sgRNA1308	30	41	31	87	123	107	154	85	68	72	54	85
sgRNA1309	0	45	83	102	82	89	136	248	28	93	66	26
sgRNA1310	109	146	104	120	221	191	50	96	344	159	122	187
sgRNA1311	87	245	165	239	205	250	245	77	285	278	232	187
sgRNA1312	0	79	96	108	76	92	132	128	174	116	63	236
sgRNA1313	38	131	156	130	157	160	292	27	147	214	110	144
sgRNA1314	54	133	140	136	101	145	114	106	107	210	82	106
sgRNA1315	195	209	49	182	261	250	479	31	116	302	326	115
sgRNA1316	16	178	100	123	150	176	0	18	91	181	108	107
sgRNA1317	102	177	112	153	89	121	0	295	151	198	72	176
sgRNA1318	198	100	128	146	70	66	136	110	101	211	141	82
sgRNA1319	53	97	47	101	51	105	208	163	61	150	107	98
sgRNA1320	175	218	210	312	209	288	111	167	240	355	247	173
sgRNA1321	332	168	198	149	135	158	69	72	329	224	64	353
sgRNA1322	58	201	125	178	117	189	98	41	104	239	70	178
sgRNA1323	26	185	17	183	160	174	205	85	20	234	286	128
sgRNA1324	68	161	72	156	128	143	128	255	308	222	103	357
sgRNA1325	365	207	48	215	184	219	271	67	175	318	246	233
sgRNA1326	85	148	114	155	139	180	0	60	152	213	199	54
sgRNA1327	192	113	137	180	150	159	277	186	58	216	166	231
sgRNA1328	130	206	91	237	211	254	165	151	400	323	318	205
sgRNA1329	100	274	391	178	147	204	134	54	170	297	92	414
sgRNA1330	127	136	63	162	125	138	271	131	26	185	132	161
sgRNA1331	458	218	220	221	262	261	338	166	263	327	174	295
sgRNA1332	114	231	187	214	249	233	167	79	129	316	250	117
sgRNA1333	212	201	199	130	165	253	156	115	273	119	253	396
sgRNA1334	379	160	156	117	256	150	127	51	67	206	56	216
sgRNA1335	86	142	75	93	81	85	71	0	83	128	63	77
sgRNA1336	33	170	243	199	142	226	421	103	313	229	227	43
sgRNA1337	40	119	216	131	116	120	0	146	47	151	48	52
sgRNA1338	17	107	109	114	89	121	73	128	68	135	127	53
sgRNA1339	28	33	46	13	4	38	0	29	66	19	36	49
sgRNA1340	70	17	80	8	4	26	0	10	29	6	0	11
sgRNA1341	28	116	78	108	149	115	46	59	80	144	116	157
sgRNA1342	112	60	23	31	107	50	0	115	3	23	0	0
sgRNA1343	27	74	42	37	80	62	148	80	53	26	9	56
sgRNA1344	0	18	7	7	1	33	105	46	0	8	24	0
sgRNA1345	126	42	99	59	87	111	0	76	77	43	71	9
sgRNA1346	334	306	198	354	249	273	372	125	193	293	202	256
sgRNA1347	43	234	14	168	163	269	91	181	69	314	105	138
sgRNA1348	202	261	279	248	300	302	179	127	176	337	197	404
sgRNA1349	54	190	44	148	90	143	12	60	99	226	189	233
sgRNA1350	18	135	186	202	225	194	300	70	120	229	191	320
sgRNA1351	161	279	216	307	220	231	143	118	138	306	167	201
sgRNA1352	126	189	382	154	235	173	77	12	100	239	80	77
sgRNA1353	79	78	94	133	108	120	0	108	85	135	168	184
sgRNA1354	58	159	42	174	182	198	0	79	90	314	226	92
sgRNA1355	33	85	56	118	111	104	174	124	73	132	175	158
sgRNA1356	0	70	109	108	103	110	213	74	146	126	151	165
sgRNA1357	5508	413	2294	108	690	73	1529	2448	559	73	1418	888
sgRNA1358	34	132	119	135	216	177	83	14	185	188	132	199
sgRNA1359	6	230	84	209	302	201	298	110	304	293	262	180
sgRNA1360	15	48	50	102	143	123	232	56	116	115	69	96
sgRNA1361	217	104	44	138	165	138	75	111	364	191	126	214
sgRNA1362	25	84	25	76	66	97	0	0	39	96	10	0
sgRNA1363	32	148	205	166	146	162	63	120	282	215	101	137
sgRNA1364	28	103	124	105	252	121	46	124	65	165	108	95
sgRNA1365	152	170	264	153	113	143	47	75	250	167	103	351
sgRNA1366	0	57	0	72	46	52	0	48	154	98	103	0
sgRNA1367	45	70	128	104	111	112	307	103	130	169	53	67
sgRNA1368	89	213	235	279	282	310	37	245	279	468	226	187
sgRNA1369	16	149	49	194	160	184	404	107	76	238	86	365
sgRNA1370	148	195	99	193	211	212	55	119	221	276	89	92
sgRNA1371	0	97	100	121	127	188	349	42	72	170	81	74
sgRNA1372	77	177	268	237	217	181	247	148	258	282	226	284
sgRNA1373	98	198	316	170	225	163	0	100	235	244	237	202
sgRNA1374	265	249	330	364	331	349	227	356	627	463	357	320
sgRNA1375	36	151	194	162	183	175	103	41	43	250	166	378
sgRNA1376	0	165	223	146	198	173	0	33	134	196	117	112
sgRNA1377	483	275	120	221	256	304	296	113	275	271	218	261
sgRNA1378	120	199	150	154	130	159	32	29	131	255	115	113
sgRNA1379	164	68	42	87	88	107	23	0	22	91	197	199
sgRNA1380	9	154	154	174	101	120	209	15	143	237	88	69
sgRNA1381	13	179	130	130	121	130	353	34	144	142	87	191
sgRNA1382	38	137	42	123	126	130	33	32	83	170	60	209
sgRNA1383	12	100	156	96	123	139	139	194	128	166	158	28
sgRNA1384	197	239	8	200	250	202	62	149	58	310	89	333
sgRNA1385	359	451	205	377	347	324	381	85	267	474	265	260
sgRNA1386	0	133	36	124	56	122	218	126	119	173	19	58
sgRNA1387	44	230	345	271	204	299	424	141	273	351	426	120
sgRNA1388	62	80	49	80	47	97	85	49	31	122	101	0
sgRNA1389	124	147	43	145	128	152	290	35	158	209	95	154
sgRNA1390	157	186	39	162	187	155	0	160	387	224	132	98
sgRNA1391	26	72	25	75	145	84	182	57	31	111	196	64
sgRNA1392	10	133	128	173	175	143	154	76	49	201	221	186
sgRNA1393	103	170	66	194	163	218	93	127	195	250	183	173
sgRNA1394	35	218	270	212	117	206	30	0	56	186	52	44
sgRNA1395	148	400	167	472	231	375	250	183	252	368	199	62
sgRNA1396	214	198	140	206	172	223	0	86	81	207	41	41
sgRNA1397	181	169	21	97	119	112	167	0	55	143	67	64
sgRNA1398	3	100	26	123	105	92	0	84	30	110	116	116
sgRNA1399	94	136	582	170	135	174	106	81	355	185	121	547
sgRNA1400	42	166	68	215	186	196	404	22	168	265	220	36
sgRNA1401	0	171	73	134	105	132	124	36	149	132	38	104
sgRNA1402	134	335	201	322	223	371	273	211	207	416	249	220
sgRNA1403	92	100	90	72	85	77	6	37	107	102	95	139
sgRNA1404	0	167	170	146	229	173	132	193	249	318	122	122
sgRNA1405	11	91	222	124	87	98	96	44	211	194	168	101
sgRNA1406	87	286	164	306	209	250	119	76	142	318	267	189
sgRNA1407	0	79	43	69	74	47	171	50	26	100	28	44
sgRNA1408	47	232	84	252	276	269	69	446	302	313	254	55
sgRNA1409	244	238	51	256	158	269	178	93	255	349	140	178
sgRNA1410	57	122	69	107	120	118	61	64	45	146	225	175
sgRNA1411	187	209	153	247	302	269	216	248	272	309	186	202
sgRNA1412	44	115	73	150	174	124	0	140	163	169	61	112
sgRNA1413	95	260	148	286	272	274	231	270	173	383	182	256
sgRNA1414	20	228	90	144	203	167	74	146	276	246	119	93
sgRNA1415	171	163	93	128	129	151	4	164	106	203	199	47
sgRNA1416	41	63	124	64	53	55	144	0	94	78	78	42
sgRNA1417	45	136	30	156	189	164	94	31	43	232	122	58
sgRNA1418	113	130	84	101	79	119	0	21	86	134	198	211
sgRNA1419	154	111	96	154	90	132	89	167	313	144	154	151
sgRNA1420	60	158	450	159	178	185	287	347	263	244	233	148
sgRNA1421	176	186	333	235	221	259	192	169	91	291	91	121
sgRNA1422	488	165	101	152	67	160	83	207	149	251	113	87
sgRNA1423	12	130	25	121	145	119	126	169	81	146	110	199
sgRNA1424	90	68	81	107	53	77	139	13	111	110	178	0
sgRNA1425	80	203	17	237	192	221	115	103	229	333	170	302
sgRNA1426	125	219	34	201	236	105	73	124	254	173	264	136
sgRNA1427	123	146	98	140	114	96	37	0	49	184	149	50
sgRNA1428	22	148	14	120	172	136	40	179	100	182	112	100
sgRNA1429	0	117	235	193	192	136	56	162	207	202	171	278
sgRNA1430	78	108	239	112	95	96	224	42	64	143	21	184
sgRNA1431	63	217	139	220	163	233	201	0	392	319	154	111
sgRNA1432	2	24	11	13	38	13	0	0	0	25	51	0
sgRNA1433	239	221	64	187	203	271	144	65	307	371	202	200
sgRNA1434	12	124	52	132	174	154	32	81	195	157	158	143
sgRNA1435	39	85	0	98	120	104	16	24	72	152	144	76
sgRNA1436	10	236	247	176	230	216	361	185	131	311	136	214
sgRNA1437	290	270	169	353	196	324	206	185	506	394	302	521
sgRNA1438	34	127	27	127	150	153	53	26	126	199	198	219
sgRNA1439	203	99	12	95	73	107	229	43	55	145	100	175
sgRNA1440	27	135	150	200	153	244	118	132	124	234	78	262
sgRNA1441	8	102	123	190	152	197	86	210	95	232	64	189
sgRNA1442	98	139	199	156	129	134	0	234	183	181	289	82
sgRNA1443	1	114	237	116	113	206	327	97	460	183	148	118
sgRNA1444	111	209	88	229	233	169	141	158	135	238	187	241
sgRNA1445	42	239	392	271	270	292	124	80	299	443	310	159
sgRNA1446	79	94	328	128	66	131	174	81	48	142	216	68
sgRNA1447	24	184	240	114	111	163	184	173	224	205	117	140
sgRNA1448	497	165	168	247	178	229	254	260	166	290	205	504
sgRNA1449	0	202	177	241	179	235	88	118	136	287	204	152
sgRNA1450	199	340	215	328	177	269	309	231	227	378	238	253
sgRNA1451	63	176	124	133	133	135	264	48	80	187	184	71
sgRNA1452	54	206	117	159	232	168	118	156	141	208	119	310
sgRNA1453	9	83	408	128	160	215	0	14	242	185	90	102
sgRNA1454	43	193	277	175	302	234	150	134	158	262	157	99
sgRNA1455	24	187	135	217	134	194	279	29	148	269	336	211
sgRNA1456	210	163	51	215	141	171	152	87	164	262	151	225
sgRNA1457	16	159	179	137	154	144	143	52	264	206	184	76
sgRNA1458	96	189	287	182	229	191	167	83	82	295	231	352
sgRNA1459	127	189	191	230	149	214	45	32	102	236	300	171
sgRNA1460	2	124	61	94	109	83	173	104	144	132	117	87
sgRNA1461	232	155	23	90	94	93	64	89	119	128	67	0
sgRNA1462	161	110	85	110	57	110	75	14	121	175	158	239
sgRNA1463	110	107	0	196	140	162	149	120	206	237	162	138
sgRNA1464	217	267	188	243	261	277	219	219	299	360	331	425
sgRNA1465	16	287	142	233	194	291	155	38	194	312	311	289
sgRNA1466	0	175	264	146	165	153	369	190	104	251	175	218
sgRNA1467	19	280	295	201	152	197	424	99	275	377	490	246
sgRNA1468	48	125	39	169	98	129	137	69	96	179	176	61
sgRNA1469	0	104	106	171	172	203	278	228	66	216	57	225
sgRNA1470	15	154	307	143	124	135	38	134	30	210	66	186
sgRNA1471	0	107	15	155	129	113	87	41	93	178	197	191
sgRNA1472	328	173	72	199	189	236	155	204	230	287	202	323
sgRNA1473	97	113	42	156	109	146	165	62	192	239	194	191
sgRNA1474	162	251	171	214	190	264	157	205	316	293	177	280
sgRNA1475	28	169	196	137	195	118	202	44	136	179	60	162
sgRNA1476	19	233	91	199	235	191	288	92	144	284	129	135
sgRNA1477	61	253	49	334	329	311	102	349	240	343	269	294
sgRNA1478	48	253	462	229	235	247	108	179	279	336	242	77
sgRNA1479	167	288	253	323	314	330	862	433	220	385	236	500
sgRNA1480	145	213	64	180	214	160	54	81	322	251	94	88
sgRNA1481	68	212	90	182	202	193	64	41	228	260	159	104
sgRNA1482	8	198	0	186	211	201	144	176	107	277	127	168
sgRNA1483	86	150	13	121	190	124	0	109	57	173	167	63
sgRNA1484	247	194	161	252	167	238	321	391	93	367	177	225
sgRNA1485	178	92	134	140	137	201	102	34	158	224	140	74
sgRNA1486	66	143	250	163	96	184	240	148	100	210	85	129
sgRNA1487	84	296	27	291	259	280	430	418	406	380	128	163
sgRNA1488	7	258	105	325	305	264	497	0	145	354	179	240
sgRNA1489	0	115	44	114	133	178	5	68	83	201	94	109
sgRNA1490	175	385	331	362	303	339	246	96	266	421	466	267
sgRNA1491	499	197	157	188	281	190	192	56	225	245	173	267
sgRNA1492	104	60	108	60	77	81	0	14	99	87	97	35
sgRNA1493	87	82	80	61	84	77	136	15	162	105	19	119
sgRNA1494	12	92	4	85	36	71	119	0	134	100	111	51
sgRNA1495	50	101	51	144	127	131	128	29	106	180	73	216
sgRNA1496	68	83	35	111	194	102	129	0	153	169	81	141
sgRNA1497	21	132	71	173	120	170	40	56	168	155	90	58
sgRNA1498	14	149	56	105	88	101	67	35	70	142	63	79
sgRNA1499	23	80	15	72	32	103	0	55	72	116	9	32

## Sheet: FSCMax_vs_FSCMiddle
sgRNA	target_operon_locus_tags	target_operon_names	log2FoldChange	lfcSE	pvalue	padj	significant	norm_FSCMax_median	norm_FSCMiddle_median
sgRNA0001	SPV_0001,SPV_0002	dnaA,dnaN	1.60192	1.54778	0.300679	0.817735	FALSE	14.5766	5.98466
sgRNA0002	SPV_0004	ychF	0.58108	0.658195	0.377323	0.834293	FALSE	124.838	79.0491
sgRNA0003	SPV_0007,SPV_0008	SPV_0007,divIC	4.4459	0.707589	3.31736e-10	5.52156e-08	TRUE	466.817	26.7519
sgRNA0004	SPV_0012	hpt	0.318275	0.399209	0.425297	0.842719	FALSE	86.2446	87.7167
sgRNA0005	SPV_0024,SPV_2078	purA,ccnC	-0.0778288	0.461689	0.866132	0.973342	FALSE	120.375	108.883
sgRNA0006	SPV_0023,SPV_0024,SPV_2078	comW,purA,ccnC	0.663941	0.432608	0.124848	0.62549	FALSE	78.6614	72.4604
sgRNA0007	SPV_2078	ccnC	0.66328	0.665551	0.318964	0.819042	FALSE	150.372	133.144
sgRNA0008	SPV_0025,SPV_0026	SPV_0025,scRNA	-0.170528	0.856561	0.842197	0.968993	FALSE	74.8872	74.614
sgRNA0009	SPV_0026	scRNA	0.237546	0.863431	0.783225	0.953105	FALSE	134.54	144.777
sgRNA0010	SPV_0027,SPV_0028,SPV_0029	dut,SPV_0028,radA	0.707484	0.335737	0.0350954	0.343267	FALSE	204.335	123.425
sgRNA0011	SPV_0030,SPV_2079	SPV_0030,prsW	1.58993	0.495909	0.00134553	0.0305394	TRUE	389.36	125.132
sgRNA0012	SPV_0033	prs1	-0.49036	1.09592	0.654555	0.928526	FALSE	21.6703	34.1477
sgRNA0013	SPV_2081	srf-01	-0.532832	0.326611	0.102806	0.599236	FALSE	139.018	188.021
sgRNA0014	SPV_2082,SPV_0037	SPV_2082,SPV_0037	0.624681	0.646907	0.334222	0.823462	FALSE	139.374	89.9651
sgRNA0015	SPV_0039	SPV_0039	-0.223646	0.332656	0.50139	0.881139	FALSE	139.523	153.335
sgRNA0016	SPV_0040	yeiH	-0.12766	0.440465	0.771946	0.951994	FALSE	124.526	104.654
sgRNA0017	SPV_0046	blpU	-0.0717999	0.385954	0.85242	0.968993	FALSE	145.922	175.928
sgRNA0018	SPV_0051,SPV_0052,SPV_0053,SPV_0054,SPV_0055,SPV_0056,SPV_0057,SPV_0058,SPV_0059,SPV_0060,SPV_0061,SPV_0062	purC,purL,purF,purM,purN,vanZ,purH,purD,purE,purK,SPV_0061,purB	0.139337	0.446787	0.755144	0.944026	FALSE	150.045	131.829
sgRNA0019	SPV_0058,SPV_0059,SPV_0060,SPV_0061,SPV_0062	purD,purE,purK,SPV_0061,purB	-0.199363	0.397435	0.615931	0.917162	FALSE	134.936	162.587
sgRNA0020	SPV_0061,SPV_0062	SPV_0061,purB	0.705558	0.809936	0.383684	0.834293	FALSE	79.5347	73.1456
sgRNA0021	SPV_0064	cpsR	0.143379	0.590614	0.808189	0.960053	FALSE	55.2816	87.7752
sgRNA0022	SPV_0065,SPV_0066,SPV_0067,SPV_0068,SPV_0069,SPV_0070,SPV_0071	bgaC,gadV,gadW,gadE,gadF,agaS,galM	0.874337	0.529459	0.0986615	0.596113	FALSE	112.913	81.6235
sgRNA0023	SPV_0072,SPV_0073	SPV_0072,SPV_0073	0.159996	0.409011	0.695667	0.935178	FALSE	112.844	93.6252
sgRNA0024	SPV_0073	SPV_0073	0.611734	0.393185	0.119745	0.616596	FALSE	141.514	124.124
sgRNA0025	SPV_0074	SPV_0074	1.09669	0.827513	0.185075	0.699139	FALSE	122.136	112.03
sgRNA0026	SPV_0076	SPV_0076	0.0333083	0.576356	0.953915	0.993482	FALSE	71.4785	77.5275
sgRNA0027	SPV_2092,SPV_0078	SPV_2092,SPV_0078	0.411536	0.424144	0.331909	0.820461	FALSE	148.2	164.88
sgRNA0028	SPV_0080	pavB	0.279824	0.791456	0.723671	0.935178	FALSE	88.7086	94.3003
sgRNA0029	SPV_0081,SPV_0082	SPV_0081,SPV_0082	0.0579636	0.4554	0.898718	0.983057	FALSE	105.509	95.9181
sgRNA0030	SPV_0083	rpsD	2.09051	0.94013	0.0261729	0.287626	FALSE	72.8164	38.7838
sgRNA0031	SPV_0091	SPV_0091	-0.223416	0.840706	0.790433	0.958168	FALSE	188.782	189.496
sgRNA0032	SPV_0092	SPV_0092	-0.942134	0.768053	0.219953	0.760947	FALSE	125.365	158.69
sgRNA0033	SPV_0093,SPV_0094,SPV_0095,SPV_0096	ptvC,ptvB,ptvA,ptvR	-0.189953	0.405659	0.639601	0.927301	FALSE	201.011	215.3
sgRNA0034	SPV_0097	SPV_0097	1.67978	0.886777	0.058191	0.464981	FALSE	72.3664	42.7741
sgRNA0035	SPV_0098	SPV_0098	7.1169	1.28817	3.29818e-08	3.80052e-06	TRUE	138.01	0
sgRNA0036	SPV_0099	aatA	7.67255	1.75231	1.19475e-05	0.000542344	TRUE	182.335	0
sgRNA0037	SPV_2095,SPV_0101,SPV_0102,SPV_0103	SPV_2095,gph,sdhA,sdhB	0.166674	0.845672	0.843757	0.968993	FALSE	95.9477	100.198
sgRNA0038	SPV_0104	SPV_0104	0.779329	0.48673	0.109343	0.608622	FALSE	113.602	77.4223
sgRNA0039	SPV_0107,SPV_0108	SPV_0107,SPV_0108	0.453337	0.469349	0.334102	0.823462	FALSE	106.493	67.8309
sgRNA0040	SPV_0112	SPV_0112	0.232379	0.45728	0.61133	0.916372	FALSE	72.609	87.4965
sgRNA0041	SPV_0123,SPV_0124,SPV_2103	SPV_0123,SPV_0124,SPV_2103	-0.416702	0.479421	0.38475	0.834377	FALSE	107.367	127.42
sgRNA0042	SPV_0119,SPV_0120,SPV_0121,SPV_2102,SPV_0122,SPV_0123,SPV_0124,SPV_2103	SPV_0119,SPV_0120,SPV_0121,SPV_2102,SPV_0122,SPV_0123,SPV_0124,SPV_2103	0.167545	0.391404	0.668606	0.932867	FALSE	168.567	173.513
sgRNA0043	SPV_0126	pspA	0.232979	0.452731	0.606827	0.915855	FALSE	98.8368	101.362
sgRNA0044	SPV_0127,SPV_2107,SPV_0128,SPV_0129	mnmA,srf-04,SPV_0128,mnmG	1.38662	0.859806	0.106806	0.606045	FALSE	55.2446	31.4675
sgRNA0045	SPV_0128,SPV_0129	SPV_0128,mnmG	0.891858	0.776981	0.25103	0.795642	FALSE	63.205	50.9738
sgRNA0046	SPV_0131	SPV_0131	3.45244	0.748259	3.95047e-06	0.000257296	TRUE	350.791	31.2144
sgRNA0047	SPV_2109,SPV_0132	cibC,cibB	-0.678287	0.46227	0.142295	0.651859	FALSE	120.419	204.229
sgRNA0048	SPV_2109,SPV_0132,SPV_0133	cibC,cibB,cibA	0.250321	0.8956	0.779861	0.953105	FALSE	159.839	122.818
sgRNA0049	SPV_0134	SPV_0134	-0.72869	0.946142	0.441199	0.8471	FALSE	51.5856	63.4676
sgRNA0050	SPV_2119	srf-05	-0.281942	0.491415	0.566148	0.900946	FALSE	101.986	104.25
sgRNA0051	SPV_0144	mutR1	-0.117322	0.462131	0.799594	0.958168	FALSE	106.268	129.82
sgRNA0052	SPV_2120	srf-06	0.139166	0.317104	0.660759	0.929786	FALSE	153.401	143.81
sgRNA0053	SPV_0145,SPV_0146,SPV_0147,SPV_0148	SPV_0145,SPV_0146,SPV_0147,SPV_0148	-0.379492	0.558336	0.496704	0.878957	FALSE	70.9659	89.7
sgRNA0054	SPV_0146,SPV_0147,SPV_0148	SPV_0146,SPV_0147,SPV_0148	0.705024	0.653386	0.280574	0.811389	FALSE	97.5326	51.7865
sgRNA0055	SPV_0147,SPV_0148	SPV_0147,SPV_0148	-0.783358	0.661949	0.236647	0.780675	FALSE	54.5664	65.7837
sgRNA0056	SPV_0150	gshT	-0.395953	0.298307	0.184398	0.699139	FALSE	130.381	182.385
sgRNA0057	SPV_0151	metQ	-0.920426	0.583742	0.114849	0.612909	FALSE	83.9336	133.086
sgRNA0058	SPV_0153,SPV_0154	metN,metP	-0.97564	0.849716	0.250888	0.795642	FALSE	112.239	159.294
sgRNA0059	SPV_0155	SPV_0155	0.0926859	0.391022	0.812629	0.961386	FALSE	150.646	138.427
sgRNA0060	SPV_0156,SPV_0157,SPV_0158	SPV_0156,SPV_0157,SPV_0158	-0.854309	0.504109	0.0901345	0.586519	FALSE	151.357	229.625
sgRNA0061	SPV_0159	SPV_0159	1.09055	1.11942	0.329949	0.819042	FALSE	116.614	133.683
sgRNA0062	SPV_0160	nrdI	0.152919	0.398577	0.701229	0.935178	FALSE	109.676	98.2297
sgRNA0063	SPV_0161	SPV_0161	-0.632579	0.435235	0.146108	0.659244	FALSE	113.26	153.263
sgRNA0064	SPV_0162,SPV_0163	SPV_0162,SPV_0163	-0.555573	0.446737	0.213638	0.754254	FALSE	211.668	214.588
sgRNA0065	SPV_0165	hexB	0.281817	0.401946	0.48322	0.870029	FALSE	264.031	220.192
sgRNA0066	SPV_0166,SPV_0167,SPV_0168,SPV_0169	ribH,ribB,ribE,ribD	-0.287288	0.36265	0.428249	0.843416	FALSE	146.527	149.013
sgRNA0067	SPV_0170,SPV_0171	ruvA,tag	0.125334	0.402522	0.755519	0.944026	FALSE	128.035	124.341
sgRNA0068	SPV_0173	SPV_0173	-0.11923	0.43257	0.782831	0.953105	FALSE	83.6167	91.3533
sgRNA0069	SPV_0174,SPV_0175	SPV_0174,corA1	-0.889977	0.777273	0.25221	0.795642	FALSE	70.774	74.2721
sgRNA0070	SPV_0176,SPV_0177	uvrA,ypdF	0.322161	0.53568	0.547569	0.893397	FALSE	83.4548	90.9675
sgRNA0071	SPV_0178	spxA2	3.62114	0.820724	1.02358e-05	0.000491693	TRUE	299.466	27.3109
sgRNA0072	SPV_0180,SPV_0181,SPV_0182	SPV_0180,yqgF,SPV_0182	0.333963	0.846487	0.693191	0.935178	FALSE	92.902	91.2758
sgRNA0073	SPV_0184	SPV_0184	-0.0261176	0.458615	0.954586	0.993482	FALSE	77.913	91.7398
sgRNA0074	SPV_0185	cls	0.202414	1.06097	0.848696	0.968993	FALSE	141.99	77.0405
sgRNA0075	SPV_2121,SPV_0186	SPV_2121,SPV_0186	1.57543	0.955237	0.0990955	0.596113	FALSE	104.455	68.3941
sgRNA0076	SPV_0186	SPV_0186	0.886241	0.38273	0.0205814	0.246656	FALSE	377.614	184.73
sgRNA0077	SPV_0187,SPV_0188,SPV_0189,SPV_0190,SPV_0191	nrdD,SPV_0188,SPV_0189,nrdG,SPV_0191	0.153599	0.544989	0.778067	0.953021	FALSE	131	106.464
sgRNA0078	SPV_0191	SPV_0191	-0.142906	0.465305	0.75875	0.944026	FALSE	161.599	179.792
sgRNA0079	SPV_0192,SPV_0193,SPV_0194,SPV_0195,SPV_0196,SPV_0197,SPV_0198,SPV_0199,SPV_0200,SPV_0201,SPV_0202,SPV_0203,SPV_0204,SPV_0205,SPV_0206,SPV_0207,SPV_0208,SPV_0209,SPV_0210,SPV_0211,SPV_0212,SPV_0213	rpsJ,rplC,rplD,rplW,rplB,rpsS,rplV,rpsC,rplP,rpmC,rpsQ,rplN,rplX,rplE,rpsN,rpsH,rplF,rplR,rpsE,rpmD,rplO,secY	1.71638	0.636836	0.0070353	0.112116	FALSE	93.3526	46.5845
sgRNA0080	SPV_0193,SPV_0194,SPV_0195,SPV_0196,SPV_0197,SPV_0198,SPV_0199,SPV_0200,SPV_0201,SPV_0202,SPV_0203,SPV_0204,SPV_0205,SPV_0206,SPV_0207,SPV_0208,SPV_0209,SPV_0210,SPV_0211,SPV_0212,SPV_0213	rplC,rplD,rplW,rplB,rpsS,rplV,rpsC,rplP,rpmC,rpsQ,rplN,rplX,rplE,rpsN,rpsH,rplF,rplR,rpsE,rpmD,rplO,secY	0.42196	0.67348	0.530963	0.890427	FALSE	120.557	138.838
sgRNA0081	SPV_0201,SPV_0202,SPV_0203,SPV_0204,SPV_0205,SPV_0206,SPV_0207,SPV_0208,SPV_0209,SPV_0210,SPV_0211,SPV_0212,SPV_0213	rpmC,rpsQ,rplN,rplX,rplE,rpsN,rpsH,rplF,rplR,rpsE,rpmD,rplO,secY	2.7214	0.803155	0.000703067	0.0181585	TRUE	85.1603	21.9787
sgRNA0082	SPV_0215,SPV_2122,SPV_0216,SPV_0217,SPV_0218,SPV_0219	infA,rpmJ,rpsM,rpsK,rpoA,rplQ	2.10931	1.04637	0.0438173	0.385773	FALSE	44.3744	12.106
sgRNA0083	SPV_0220,SPV_0221	SPV_0220,SPV_0221	0.350859	0.58359	0.547702	0.893397	FALSE	155.379	156.506
sgRNA0084	SPV_2125	ccnE	0.256759	0.475163	0.588949	0.906277	FALSE	129.391	132.484
sgRNA0085	SPV_0222	gpmB1	-0.519467	0.531983	0.328829	0.819042	FALSE	85.9346	105.4
sgRNA0086	SPV_0228,SPV_0229	SPV_0228,SPV_0229	0.942203	0.502136	0.0606016	0.469855	FALSE	115.787	77.3617
sgRNA0087	SPV_0238	leuS	1.71332	1.38463	0.215946	0.754254	FALSE	12.2385	2.81564
sgRNA0088	SPV_0239	SPV_0239	0.813408	0.780816	0.297532	0.817735	FALSE	113.778	75.2346
sgRNA0089	SPV_2129	ccnA	-0.489787	0.440983	0.266711	0.804464	FALSE	118.363	139.686
sgRNA0090	SPV_2131	srf-07	-0.741817	0.756837	0.32701	0.819042	FALSE	156.758	166.054
sgRNA0091	SPV_2132	SPV_2132	0.748582	0.865433	0.38705	0.837386	FALSE	161.209	131.774
sgRNA0092	SPV_0241	ruvB	1.0593	0.459698	0.0212042	0.252094	FALSE	123.199	107.565
sgRNA0093	SPV_0243,SPV_0244,SPV_0245,SPV_0246	uppS,cdsA,eep,proS	2.85917	1.51288	0.0587738	0.464981	FALSE	14.3226	5.98466
sgRNA0094	SPV_0247	bglA	0.119123	0.405127	0.768729	0.950129	FALSE	139.594	161.609
sgRNA0095	SPV_0248	glmS	7.18114	1.61885	9.16691e-06	0.000457734	TRUE	35.2452	0
sgRNA0096	SPV_0249	SPV_0249	-0.566921	0.446691	0.204385	0.739538	FALSE	212.695	234.006
sgRNA0097	SPV_0250	spuA	-1.13968	0.821989	0.165599	0.69083	FALSE	116.318	138.423
sgRNA0098	SPV_0251,SPV_0252	rpsL,rpsG	2.31496	1.10696	0.036503	0.346085	FALSE	48.1913	20.7388
sgRNA0099	SPV_0253	fusA	1.97298	0.874278	0.0240273	0.279014	FALSE	44.9299	15.5425
sgRNA0100	SPV_0254	polC	1.04743	1.27875	0.412728	0.83893	FALSE	29.6264	23.8185
sgRNA0101	SPV_0255	relB1	-0.0151288	0.549775	0.978046	0.994736	FALSE	80.5686	75.6952
sgRNA0102	SPV_0260	rsuA-1	0.4966	0.459327	0.279632	0.810229	FALSE	176.531	155.437
sgRNA0103	SPV_0261	pepC	0.320727	0.347715	0.356328	0.832705	FALSE	153.63	129.953
sgRNA0104	SPV_0262,SPV_0263,SPV_0264	manN,manM,manL	0.400226	0.474664	0.399129	0.83893	FALSE	98.0103	65.7793
sgRNA0105	SPV_0265	adhA	0.268512	0.40195	0.504118	0.881139	FALSE	119.452	112.572
sgRNA0106	SPV_2134	SPV_2134	0.540205	0.330833	0.102498	0.599236	FALSE	160.809	112.476
sgRNA0107	SPV_0266	SPV_0266	-0.83553	0.691316	0.226814	0.770316	FALSE	125.286	156.82
sgRNA0108	SPV_0267	SPV_0267	0.34006	0.915894	0.710424	0.935178	FALSE	119.312	110.014
sgRNA0109	SPV_0269	sulA	-0.037067	0.765092	0.961359	0.993482	FALSE	39.409	34.9177
sgRNA0110	SPV_0273	SPV_0273	0.60007	0.562623	0.286171	0.814959	FALSE	84.8035	68.2783
sgRNA0111	SPV_0274,SPV_0275	rplM,rpsI	4.35773	1.2285	0.00038935	0.0112163	TRUE	72.9153	4.27992
sgRNA0112	SPV_0279,SPV_0280,SPV_0281,SPV_0282,SPV_0283	celB,celR,celC,SPV_0282,celD	-0.399293	0.974004	0.681843	0.934749	FALSE	79.6183	94.0576
sgRNA0113	SPV_0280,SPV_0281,SPV_0282,SPV_0283	celR,celC,SPV_0282,celD	-0.547719	0.608899	0.368374	0.832705	FALSE	79.1269	81.0635
sgRNA0114	SPV_0277,SPV_0278,SPV_0279,SPV_0280,SPV_0281,SPV_0282,SPV_0283	celA,SPV_0278,celB,celR,celC,SPV_0282,celD	-0.180533	0.933871	0.846711	0.968993	FALSE	55.1242	34.5093
sgRNA0115	SPV_0284	SPV_0284	-0.901878	0.714089	0.206597	0.745741	FALSE	71.9555	98.5083
sgRNA0116	SPV_0286	basA	-0.800243	0.34427	0.0201005	0.245215	FALSE	117.745	181.616
sgRNA0117	SPV_0288,SPV_2140	SPV_0288,SPV_2140	0.145553	0.787517	0.853366	0.968993	FALSE	58.8471	82.9715
sgRNA0118	SPV_0289,SPV_0290,SPV_0291,SPV_0292	eda,SPV_0290,SPV_0291,SPV_0292	0.183872	0.407193	0.651585	0.928526	FALSE	141.774	134.669
sgRNA0119	SPV_0301	regR	-0.269882	0.465326	0.561924	0.900946	FALSE	152.523	169.88
sgRNA0120	SPV_0303	SPV_0303	0.360305	0.338192	0.286701	0.814959	FALSE	236.749	183.362
sgRNA0121	SPV_0304	mraW	4.07857	1.75511	0.0201345	0.245215	FALSE	17.4599	0
sgRNA0122	SPV_0306,SPV_0307	pbp2x,mraY	3.56466	1.94787	0.0672458	0.493795	FALSE	6.4235	0
sgRNA0123	SPV_0308	clpL	1.0973	1.40145	0.433645	0.845021	FALSE	112.437	101.882
sgRNA0124	SPV_0309	luxS	-0.190412	0.452386	0.673823	0.933209	FALSE	110.233	123.916
sgRNA0125	SPV_0310	SPV_0310	-0.15212	0.454426	0.737812	0.935588	FALSE	106.439	114.942
sgRNA0126	SPV_0311,SPV_0313	dexB,SPV_0313	-0.213757	0.840538	0.799256	0.958168	FALSE	87.8998	78.7894
sgRNA0127	SPV_0315,SPV_0316,SPV_0317,SPV_0318,SPV_0319,SPV_0320,SPV_0321,SPV_0322,SPV_0323,SPV_0324,SPV_0325,SPV_0326,SPV_0327,SPV_0328,SPV_0329,SPV_0330	cps2A,cps2B,cps2C,cps2D,cps2E,cps2T,cps2F,cps2G,cps2H,cps2I,cps2J,cps2K,cps2P,cps2L,cps2M,cps2N	-1.07931	0.804023	0.179469	0.699139	FALSE	238.31	1231.79
sgRNA0128	SPV_0321,SPV_0322,SPV_0323,SPV_0324,SPV_0325,SPV_0326,SPV_0327,SPV_0328,SPV_0329,SPV_0330	cps2F,cps2G,cps2H,cps2I,cps2J,cps2K,cps2P,cps2L,cps2M,cps2N	-1.59402	0.515818	0.00199965	0.0415859	TRUE	269.135	1159.31
sgRNA0129	SPV_0334	aliA	0.229258	0.42259	0.587469	0.906277	FALSE	180.466	181.905
sgRNA0130	SPV_0336,SPV_0337	pbp1a,recU	-0.914083	0.529423	0.0842462	0.571045	FALSE	29.1844	48.239
sgRNA0131	SPV_0338	SPV_0338	0.578009	0.769374	0.452489	0.854961	FALSE	86.4231	96.5913
sgRNA0132	SPV_0339	gpsB	5.27102	0.910377	7.04145e-09	9.58918e-07	TRUE	130.326	6.11082
sgRNA0133	SPV_0340	rnpB	1.99379	0.708608	0.00489793	0.0824393	FALSE	83.9359	48.8907
sgRNA0134	SPV_0343,SPV_0344	gnd,ritR	1.34794	1.64708	0.413139	0.83893	FALSE	8.34695	3.14563
sgRNA0135	SPV_0346,SPV_0347,SPV_0348,SPV_0349	mvk,mvaD,mvaK2,fni	3.78465	0.858872	1.05034e-05	0.000491693	TRUE	1865.48	74.7086
sgRNA0136	SPV_0350,SPV_0351,SPV_0352,SPV_2148	vraT,vraS,vraR,alkD	0.626731	0.891997	0.482296	0.870029	FALSE	84.7516	71.7322
sgRNA0137	SPV_0355,SPV_0356,SPV_0357	SPV_0355,cbpG,cbpK	-0.159584	0.439788	0.716705	0.935178	FALSE	82.9991	88.5897
sgRNA0138	SPV_0365	tig	0.64038	0.734519	0.383298	0.834293	FALSE	79.5121	45.3886
sgRNA0139	SPV_0367,SPV_0368	lepB,rnhC	0.868901	0.47227	0.0657915	0.487899	FALSE	182.624	143.342
sgRNA0140	SPV_0369,SPV_0370	zapA,zapB	1.14605	0.738511	0.1207	0.618749	FALSE	81.5333	53.4824
sgRNA0141	SPV_0372	glyP	0.0417197	0.611993	0.94565	0.993482	FALSE	109.806	129.542
sgRNA0142	SPV_0373	mip	0.564286	0.472275	0.232155	0.772819	FALSE	123.67	88.2174
sgRNA0143	SPV_0374	shetA	-0.907909	0.863248	0.292921	0.817735	FALSE	90.1049	115.5
sgRNA0144	SPV_0375	serS	-1.13364	0.52751	0.0316314	0.318012	FALSE	17.3073	33.4031
sgRNA0145	SPV_0375,SPV_0376,SPV_0377	serS,manO,lysC	-0.28678	0.573184	0.616844	0.917522	FALSE	143.085	152.075
sgRNA0146	SPV_0378,SPV_0379,SPV_0380,SPV_0381	fabM,fabT,fabH,acpP	-0.00663821	0.594673	0.991094	0.997084	FALSE	126.343	134.805
sgRNA0147	SPV_0379,SPV_0380,SPV_0381	fabT,fabH,acpP	2.585	0.368242	2.22112e-12	4.7532e-10	TRUE	514.678	64.4766
sgRNA0148	SPV_0382,SPV_0383,SPV_0384,SPV_0385,SPV_0386,SPV_0387,SPV_0388,SPV_0389,SPV_0390	fabK,fabD,fabG1,fabF,accB,fabZ,accC,accD,accA	0.284239	1.18065	0.80975	0.960053	FALSE	99.2786	37.4337
sgRNA0149	SPV_0391,SPV_2157	SPV_0391,ydiL	0.294263	0.410263	0.473217	0.867177	FALSE	103.333	85.6616
sgRNA0150	SPV_0393,SPV_0394,SPV_0395	nusB,SPV_0394,efp	-0.213293	0.586603	0.716152	0.935178	FALSE	122.196	159.063
sgRNA0151	SPV_0396,SPV_0397,SPV_0398	gatB,gatA,gatC	0.446312	2.98241	0.881042	0.979467	FALSE	0	0
sgRNA0152	SPV_0399	prfC	-0.565681	0.564811	0.316566	0.819042	FALSE	76.3767	94.7812
sgRNA0153	SPV_0401	rpmB	-0.172717	0.341725	0.61326	0.916372	FALSE	226.763	255.501
sgRNA0154	SPV_0402	asp23	0.0882122	0.702049	0.900009	0.983057	FALSE	117.313	98.2045
sgRNA0155	SPV_0404,SPV_0405,SPV_0406,SPV_2159,SPV_0408	ilvB,ilvH,ilvC,SPV_2159,SPV_0408	0.927521	0.785107	0.237446	0.780675	FALSE	86.9547	55.5071
sgRNA0156	SPV_0409	ilvA	-0.179305	0.298085	0.547492	0.893397	FALSE	243.194	248.616
sgRNA0157	SPV_0410	SPV_0410	-0.907485	0.810253	0.262713	0.801998	FALSE	101.852	151.64
sgRNA0158	SPV_0411,SPV_0412	glnQ1,glnHP1	-1.5934	1.11431	0.152734	0.674395	FALSE	62.9244	86.0532
sgRNA0159	SPV_0414	SPV_0414	0.101014	0.551396	0.854644	0.968993	FALSE	149.573	161.734
sgRNA0160	SPV_0417	uppP	2.19829	0.420767	1.74633e-07	1.635e-05	TRUE	977.806	183.827
sgRNA0161	SPV_0420	pfl	1.04544	1.18535	0.377793	0.834293	FALSE	30.2255	29.0154
sgRNA0162	SPV_0423	xylR	-0.868703	0.705012	0.217881	0.757276	FALSE	110.572	112.167
sgRNA0163	SPV_0429,SPV_0430	trkH,trkA	0.488081	0.836718	0.559672	0.900946	FALSE	143.722	141.021
sgRNA0164	SPV_0431	SPV_0431	0.190752	0.687819	0.781527	0.953105	FALSE	167.354	177.901
sgRNA0165	SPV_0434	mtsB	1.03517	0.744067	0.164155	0.690744	FALSE	98.2307	49.52
sgRNA0166	SPV_2167	srf-09	0.590594	0.787467	0.453259	0.855141	FALSE	52.5823	57.3202
sgRNA0167	SPV_0441	rpoE	0.638518	0.854846	0.4551	0.855515	FALSE	57.1737	57.258
sgRNA0168	SPV_0442	pyrG	-0.387394	0.55117	0.482144	0.870029	FALSE	76.3567	102.449
sgRNA0169	SPV_0443	nptA	-0.757157	0.608242	0.213195	0.754254	FALSE	113.92	214.879
sgRNA0170	SPV_0444	endoD	0.397679	0.434515	0.360074	0.832705	FALSE	113.785	59.1873
sgRNA0171	SPV_0445	pgk	0.0424583	0.491502	0.931161	0.992643	FALSE	39.9548	34.0167
sgRNA0172	SPV_0446	SPV_0446	0.41085	0.374074	0.272068	0.804464	FALSE	216.099	184.532
sgRNA0173	SPV_0447,SPV_0448	glnR,glnA	1.29082	0.897739	0.150475	0.670867	FALSE	117.469	67.5719
sgRNA0174	SPV_0452	creX	0.0397408	0.507538	0.937589	0.993344	FALSE	76.7749	86.0302
sgRNA0175	SPV_2170,SPV_0454,SPV_0455	hsdS-F,hsdM,hsdR	0.252642	0.703803	0.71962	0.935178	FALSE	130.467	125.763
sgRNA0176	SPV_0458,SPV_0459,SPV_0460,SPV_2171,SPV_0461	hrcA,grpE,dnaK,SPV_2171,dnaJ	0.357847	0.382598	0.349629	0.832705	FALSE	264.547	214.042
sgRNA0177	SPV_0462,SPV_0463	SPV_0462,SPV_0463	-0.199692	0.344903	0.562603	0.900946	FALSE	132.44	144.727
sgRNA0178	SPV_0464,SPV_0465	ecsA,ecsB	-0.365342	0.599529	0.542271	0.893397	FALSE	141.596	190.289
sgRNA0179	SPV_0466	blpT	0.288197	0.843606	0.732633	0.935588	FALSE	80.6596	82.4879
sgRNA0180	SPV_0467,SPV_0468,SPV_0469	blpS,blpR,blpH	-0.164569	0.913844	0.857087	0.968993	FALSE	64.1883	95.3391
sgRNA0181	SPV_0470,SPV_0471,SPV_0472,SPV_2175	blpC,blpB,blpA,SPV_2175	0.668528	0.485241	0.168289	0.6964	FALSE	169.8	175.328
sgRNA0182	SPV_2176,SPV_0473,SPV_0474,SPV_0475	pncW,blpY,blpZ,pncP	-0.478251	0.547978	0.382796	0.834293	FALSE	106.91	130.033
sgRNA0183	SPV_0476,SPV_0477	SPV_0476,trmB	1.29346	0.977484	0.185753	0.699139	FALSE	70.6169	27.3442
sgRNA0184	SPV_0478,SPV_0479,SPV_0480,SPV_0481,SPV_0482,SPV_0483	rimP,nusA,SPV_0480,SPV_0481,infB,rbfA	-0.567991	0.906081	0.530747	0.890427	FALSE	37.0061	71.3179
sgRNA0185	SPV_0487,SPV_0488	SPV_0487,SPV_0488	0.324579	0.836473	0.697992	0.935178	FALSE	116.867	150.798
sgRNA0186	SPV_0490	SPV_0490	0.619506	0.426233	0.146101	0.659244	FALSE	135.609	112.51
sgRNA0187	SPV_0495,SPV_0496	SPV_0495,SPV_0496	0.389169	0.98245	0.692016	0.935178	FALSE	44.8453	44.7694
sgRNA0188	SPV_2178,SPV_2179	SPV_2178,SPV_2179	0.00250467	0.544812	0.996332	0.997664	FALSE	161.408	171.751
sgRNA0189	SPV_0500,SPV_2185,SPV_2180	SPV_0500,srf-10,SPV_2180	-0.366719	0.318449	0.249494	0.795642	FALSE	136.641	177.327
sgRNA0190	SPV_2185	srf-10	-0.0764165	0.565121	0.892437	0.982993	FALSE	125.195	118.179
sgRNA0191	SPV_0504,SPV_0505	pheS,paiA	-0.250081	0.533351	0.639151	0.927301	FALSE	29.1754	46.8835
sgRNA0192	SPV_0507	SPV_0507	0.377756	0.7011	0.590022	0.906277	FALSE	83.1173	65.651
sgRNA0193	SPV_0510,SPV_0511	metE,metF	-0.835088	0.486348	0.0859687	0.572928	FALSE	186.841	263.099
sgRNA0194	SPV_0512,SPV_0513,SPV_0514,SPV_0515,SPV_0516,SPV_0517	pnp,cysE,SPV_0514,cysS,mrnC,SPV_0517	0.0971254	0.849333	0.908956	0.983117	FALSE	44.8325	56.0689
sgRNA0195	SPV_0521,SPV_0522,SPV_0523	vex1,vex2,vex3	-0.847529	0.536901	0.114437	0.612909	FALSE	76.1283	131.736
sgRNA0196	SPV_0524,SPV_0525	vncR,vncS	0.163315	0.773625	0.832806	0.967417	FALSE	74.9084	99.6129
sgRNA0197	SPV_0526	fba	-0.0976187	0.893837	0.913034	0.984683	FALSE	25.5328	27.3243
sgRNA0198	SPV_0527	SPV_0527	0.19239	0.398137	0.628935	0.923657	FALSE	201.165	195.606
sgRNA0199	SPV_0528,SPV_0529,SPV_0530,SPV_0531,SPV_2191	glnP2b,glnP2a,glnH2,glnQ2,SPV_2191	-0.048253	0.746779	0.948481	0.993482	FALSE	178.209	153.251
sgRNA0200	SPV_0532	recJ	-0.123989	0.504811	0.805981	0.959769	FALSE	105.399	115.957
sgRNA0201	SPV_0533	rnjB	1.81875	0.823904	0.0272804	0.292957	FALSE	282.982	118.516
sgRNA0202	SPV_0535,SPV_0536	murM,murN	1.76151	0.716165	0.0139075	0.186013	FALSE	231.701	106.318
sgRNA0203	SPV_0537	SPV_0537	1.31063	0.476715	0.00597246	0.0962016	FALSE	133.302	65.0046
sgRNA0204	SPV_0538,SPV_0539	uvrC,SPV_0539	0.809605	0.422611	0.0554007	0.455991	FALSE	232.369	156.662
sgRNA0205	SPV_0540	SPV_0540	0.287605	0.303162	0.342781	0.82664	FALSE	192.356	174.695
sgRNA0206	SPV_0541,SPV_0542	nrd,pepV	-0.103605	0.518462	0.841612	0.968993	FALSE	163.14	135.151
sgRNA0207	SPV_0546	brnQ	0.208393	0.402451	0.604592	0.915855	FALSE	128.425	128.492
sgRNA0208	SPV_0547,SPV_0548,SPV_0549	SPV_0547,SPV_0548,ldcB	0.0142613	0.307215	0.962974	0.993482	FALSE	230.279	263.474
sgRNA0209	SPV_0550,SPV_0551	rplK,rplA	4.03793	1.28955	0.0017405	0.0383422	TRUE	23.493	3.77978
sgRNA0210	SPV_2193	SPV_2193	-0.00667447	0.321699	0.983447	0.994736	FALSE	266.64	293.398
sgRNA0211	SPV_0554	SPV_0554	0.0274545	0.475291	0.953937	0.993482	FALSE	136.898	129.237
sgRNA0212	SPV_0558	prtA	0.883507	0.948804	0.351761	0.832705	FALSE	100.436	44.2296
sgRNA0213	SPV_0564	SPV_0564	0.869144	0.628591	0.166761	0.691988	FALSE	225.192	116.756
sgRNA0214	SPV_0571,SPV_0572,SPV_0573	ccdA-1,SPV_0572,msrAB2	-0.127626	0.574957	0.824334	0.963779	FALSE	146.307	166.647
sgRNA0215	SPV_0574,SPV_0575	yesN,yesM	-0.0768791	0.431304	0.858528	0.96916	FALSE	276.792	239.976
sgRNA0216	SPV_0576	ywlG	-0.135797	0.293786	0.643916	0.927301	FALSE	213.435	242.8
sgRNA0217	SPV_0578	pabB	0.313352	0.365499	0.391265	0.837386	FALSE	205.223	168.549
sgRNA0218	SPV_0579	cbpL	0.357629	0.649804	0.582069	0.905441	FALSE	167.46	176.057
sgRNA0219	SPV_0580	gki	-0.269182	0.303264	0.374748	0.834293	FALSE	134.316	178.829
sgRNA0220	SPV_0581	thyA	1.05997	1.19158	0.373709	0.834293	FALSE	43.9295	23.2112
sgRNA0221	SPV_0582	SPV_0582	0.419334	0.419821	0.317873	0.819042	FALSE	156.107	119.834
sgRNA0222	SPV_0583,SPV_0584,SPV_0585,SPV_0586,SPV_0587	miaA,hflX,SPV_0585,rnz,SPV_0587	0.974115	0.68178	0.153067	0.674395	FALSE	119.314	85.0908
sgRNA0223	SPV_0588	mtaR	0.463784	0.284911	0.103563	0.601014	FALSE	320.162	229.382
sgRNA0224	SPV_0589,SPV_0590	SPV_0589,SPV_0590	0.446879	0.494046	0.365715	0.832705	FALSE	203.127	232.142
sgRNA0225	SPV_0592	rsuA-2	-0.368732	0.354366	0.298089	0.817735	FALSE	236.158	273.774
sgRNA0226	SPV_0593,SPV_0594	typA,SPV_0594	1.17502	0.394377	0.00288776	0.0547577	FALSE	133.308	65.7015
sgRNA0227	SPV_0595,SPV_0596,SPV_0597	SPV_0595,SPV_0596,SPV_0597	-0.612042	0.793655	0.440607	0.8471	FALSE	124.976	137.037
sgRNA0228	SPV_0598,SPV_0599	murD,murG	4.08679	0.977085	2.88155e-05	0.00119904	TRUE	221.755	16.3576
sgRNA0229	SPV_0610	SPV_0610	-0.380633	0.400351	0.341732	0.82664	FALSE	172.967	243.288
sgRNA0230	SPV_0608,SPV_0609,SPV_0610	pyrF,pyrE,SPV_0610	-0.51902	0.474216	0.273744	0.804464	FALSE	164.91	195.139
sgRNA0231	SPV_0615,SPV_0616,SPV_0617,SPV_0618	glnH3,glnQ3,glnP3b,glnP3a	0.331411	0.45507	0.466452	0.864783	FALSE	128.987	131.961
sgRNA0232	SPV_0620	lysS	-0.473923	1.24925	0.704417	0.935178	FALSE	30.57	51.9231
sgRNA0233	SPV_0633,SPV_0634,SPV_0635	copY,cupA,ctpA	0.272964	0.410289	0.505861	0.881139	FALSE	150.862	158.275
sgRNA0234	SPV_0636	spxB	0.786547	0.865833	0.363652	0.832705	FALSE	162.1	137.398
sgRNA0235	SPV_0641	manA	0.770589	0.854854	0.367361	0.832705	FALSE	60.9529	48.5283
sgRNA0236	SPV_0644,SPV_0645	SPV_0644,SPV_0645	0.413391	0.48205	0.39113	0.837386	FALSE	237.493	180.917
sgRNA0237	SPV_0646	SPV_0646	0.517759	0.812119	0.523772	0.887569	FALSE	134.368	146.919
sgRNA0238	SPV_0647,SPV_0648	SPV_0647,comEB	0.916695	0.831639	0.270342	0.804464	FALSE	115.026	92.8
sgRNA0239	SPV_0649	upp	0.0226005	0.661505	0.972745	0.994736	FALSE	74.3486	83.1897
sgRNA0240	SPV_0650	clpP	0.716995	0.762177	0.346848	0.832658	FALSE	95.6401	96.781
sgRNA0241	SPV_0651	SPV_0651	-1.12523	0.450661	0.0125302	0.170639	FALSE	82.7244	204.518
sgRNA0242	SPV_0652	livJ	0.618374	0.814108	0.44751	0.851472	FALSE	162.439	144.659
sgRNA0243	SPV_0657	SPV_0657	-0.23342	0.3847	0.544011	0.893397	FALSE	104.22	132.864
sgRNA0244	SPV_2217	SPV_2217	2.08155	0.462533	6.7847e-06	0.000390903	TRUE	359.179	94.1227
sgRNA0245	SPV_0661	malT	0.709692	0.500929	0.156556	0.677806	FALSE	113.396	94.7438
sgRNA0246	SPV_0663	yqfR	0.785012	0.991399	0.428464	0.843416	FALSE	31.3148	19.3637
sgRNA0247	SPV_0664	metK	0.876154	0.561077	0.118392	0.615804	FALSE	80.8354	40.7179
sgRNA0248	SPV_0665,SPV_0666	pyrDa,holA	0.677985	0.848952	0.424514	0.842282	FALSE	137.987	111.726
sgRNA0249	SPV_0667	sodA	-0.341695	1.15096	0.76656	0.948382	FALSE	2.58441	2.89015
sgRNA0250	SPV_0668	SPV_0668	0.139698	0.407071	0.731464	0.935588	FALSE	148.41	134.739
sgRNA0251	SPV_0672	ppiA	-0.457619	0.377635	0.225589	0.768382	FALSE	111.443	121.587
sgRNA0252	SPV_0673,SPV_2218	SPV_0673,SPV_2218	0.282973	0.467014	0.544569	0.893397	FALSE	102.637	110.172
sgRNA0253	SPV_0674,SPV_0675	rpsP,khpA	2.42347	1.08068	0.024927	0.280142	FALSE	33.0175	16.5135
sgRNA0254	SPV_2220,SPV_0676	SPV_2220,SPV_0676	-0.574813	0.962748	0.550471	0.893397	FALSE	62.3787	86.4488
sgRNA0255	SPV_0681	SPV_0681	-0.576641	0.506397	0.254823	0.796921	FALSE	110.032	153.213
sgRNA0256	SPV_0684	bioY	0.5508	0.39766	0.166021	0.69083	FALSE	211.352	162.109
sgRNA0257	SPV_0685	gor	0.434026	0.468547	0.354278	0.832705	FALSE	145.842	131.11
sgRNA0258	SPV_0686,SPV_0687,SPV_0688	SPV_0686,SPV_0687,SPV_0688	-0.801561	0.635966	0.207531	0.747312	FALSE	84.7861	143.203
sgRNA0259	SPV_0689	metG	2.10834	1.59032	0.184928	0.699139	FALSE	10.8491	3.30242
sgRNA0260	SPV_0691	SPV_0691	0.501131	0.460308	0.276292	0.804464	FALSE	128.422	90.2225
sgRNA0261	SPV_0693	SPV_0693	0.0863566	0.333324	0.795575	0.958168	FALSE	174.271	148.393
sgRNA0262	SPV_0694,SPV_0695	SPV_0694,fabG2	-0.399188	0.599325	0.505371	0.881139	FALSE	72.6618	98.4177
sgRNA0263	SPV_0698	SPV_0698	-0.133903	0.52135	0.797303	0.958168	FALSE	150.02	162.808
sgRNA0264	SPV_0700	pepN	-0.278858	0.512354	0.586256	0.906277	FALSE	95.5912	113.154
sgRNA0265	SPV_0701,SPV_0702	ciaR,ciaH	1.31066	0.840862	0.119064	0.616596	FALSE	88.6545	50.0854
sgRNA0266	SPV_0703	SPV_0703	0.827511	0.609111	0.174288	0.699139	FALSE	92.1664	44.7475
sgRNA0267	SPV_0704	SPV_0704	-0.383483	0.790438	0.627568	0.923164	FALSE	133.921	125.271
sgRNA0268	SPV_0705	yoaA	1.06009	0.526164	0.0439316	0.385773	FALSE	340.623	103.485
sgRNA0269	SPV_0708	SPV_0708	4.36568	0.929724	2.65728e-06	0.000189552	TRUE	84.7281	8.63239
sgRNA0270	SPV_0710	ezrA	2.29933	0.585707	8.64675e-05	0.00301229	TRUE	163.574	45.5847
sgRNA0271	SPV_0714	SPV_0714	-0.532402	0.642459	0.407277	0.83893	FALSE	138.347	171.443
sgRNA0272	SPV_0717	clpE	-0.0267658	0.285466	0.925298	0.991774	FALSE	130.369	140.448
sgRNA0273	SPV_0718	SPV_0718	0.0865665	0.310997	0.780743	0.953105	FALSE	172.525	152.931
sgRNA0274	SPV_0719,SPV_0720,SPV_0721	glnP4,glnQ4,folD	-0.698502	0.404379	0.0841059	0.571045	FALSE	77.0329	104.491
sgRNA0275	SPV_0721	folD	-0.0343005	0.421696	0.935172	0.993344	FALSE	123.526	129.199
sgRNA0276	SPV_0722	nnrD	-0.0291345	0.484957	0.952095	0.993482	FALSE	139.295	177.26
sgRNA0277	SPV_0723,SPV_0724,SPV_0725,SPV_0726	rpiA,deoB,SPV_0725,SPV_0726	0.0154384	0.609151	0.979781	0.994736	FALSE	148.566	159.452
sgRNA0278	SPV_0732	rpsT	0.431626	0.843004	0.608644	0.915855	FALSE	134.418	133.185
sgRNA0279	SPV_0733	coaA	-0.481216	0.426315	0.258991	0.801998	FALSE	135.863	184.556
sgRNA0280	SPV_0735	SPV_0735	-0.388085	0.374299	0.299815	0.817735	FALSE	139.862	214.729
sgRNA0281	SPV_0737,SPV_0738,SPV_0739	deoC,cdd-1,SPV_0739	0.207953	0.621406	0.73789	0.935588	FALSE	57.7327	37.8647
sgRNA0282	SPV_0745	plsY	0.704011	0.523244	0.178473	0.699139	FALSE	109.632	60.1169
sgRNA0283	SPV_0746	parE	1.14473	0.570292	0.0447203	0.389482	FALSE	83.6473	69.5235
sgRNA0284	SPV_0749,SPV_0750,SPV_0751,SPV_0752,SPV_0753	ilvE,SPV_0750,SPV_0751,SPV_0752,pcp1	-0.0337844	0.956	0.971809	0.994736	FALSE	20.5828	18.952
sgRNA0285	SPV_0754,SPV_0755	SPV_0754,tRNA-Tyr-1	0.7022	0.738852	0.341912	0.82664	FALSE	74.2975	75.6419
sgRNA0286	SPV_0757	rpsA	-1.1415	0.454793	0.012075	0.168736	FALSE	42.1278	150.16
sgRNA0287	SPV_0759	SPV_0759	1.40927	0.99333	0.155978	0.677806	FALSE	40.6058	16.6801
sgRNA0288	SPV_0761	SPV_0761	-0.119502	0.473048	0.800561	0.958168	FALSE	105.568	136.435
sgRNA0289	SPV_0762,SPV_0763,SPV_0764,SPV_0765,SPV_0766	sufC,sufD,sufS,sufE2,sufB	0.218717	0.349032	0.530897	0.890427	FALSE	128.041	100.606
sgRNA0290	SPV_0767	pbp3	0.13935	0.373175	0.708838	0.935178	FALSE	229.135	236.38
sgRNA0291	SPV_0769	ssrA	0.840857	0.386865	0.0297413	0.307259	FALSE	155.855	101.632
sgRNA0292	SPV_0770	tRNA-Ser-1	0.2068	0.445972	0.642858	0.927301	FALSE	177.693	180.462
sgRNA0293	SPV_0771,SPV_0772	fruR,fruB	0.141279	0.510725	0.782069	0.953105	FALSE	219.268	215.92
sgRNA0294	SPV_0774	ftsK	0.775787	0.702595	0.269518	0.804464	FALSE	65.3935	65.2995
sgRNA0295	SPV_0775	SPV_0775	-0.00350188	0.427345	0.993462	0.997664	FALSE	166.208	188.553
sgRNA0296	SPV_0776,SPV_0777	SPV_0776,thiI	-0.807182	0.594215	0.174336	0.699139	FALSE	183.153	203.126
sgRNA0297	SPV_0778,SPV_2238,SPV_0781	SPV_0778,SPV_2238,SPV_0781	-0.191298	0.478983	0.689611	0.935178	FALSE	131.758	141.501
sgRNA0298	SPV_0782,SPV_0783,SPV_0784,SPV_0785	SPV_0782,SPV_0783,SPV_0784,SPV_0785	-0.870209	0.831179	0.295119	0.817735	FALSE	130.61	185.513
sgRNA0299	SPV_0784,SPV_0785	SPV_0784,SPV_0785	0.204374	0.432815	0.636786	0.926678	FALSE	135.896	85.0393
sgRNA0300	SPV_0786,SPV_0787	argR2,pepX	-1.06993	0.357188	0.00274065	0.0526345	FALSE	160.185	284.958
sgRNA0301	SPV_0788	dnaE	-0.305821	0.382004	0.42338	0.841145	FALSE	155.164	193.716
sgRNA0302	SPV_0789,SPV_0790	pfkA,pyk	0.0733531	1.08367	0.946033	0.993482	FALSE	13.1103	20.9972
sgRNA0303	SPV_0790	pyk	1.09354	1.24605	0.380158	0.834293	FALSE	29.6129	10.2278
sgRNA0304	SPV_0792,SPV_0793	SPV_0792,SPV_0793	-0.305529	0.38433	0.426633	0.843134	FALSE	128.242	144.695
sgRNA0305	SPV_0799	SPV_0799	-1.00092	0.684935	0.143922	0.657301	FALSE	98.0123	139.648
sgRNA0306	SPV_0802	tex	-0.137317	0.483832	0.776555	0.953021	FALSE	117.211	163.768
sgRNA0307	SPV_0803	SPV_0803	-0.715477	0.323429	0.0269555	0.292604	FALSE	223.163	288.311
sgRNA0308	SPV_2245	SPV_2245	0.233129	0.393837	0.553888	0.896025	FALSE	164.223	190.23
sgRNA0309	SPV_2246	SPV_2246	0.473225	0.878053	0.589922	0.906277	FALSE	136.033	151.743
sgRNA0310	SPV_2247	srf-13	-0.348517	0.45923	0.447904	0.851472	FALSE	171.678	156.702
sgRNA0311	SPV_0816	SPV_0816	-0.951348	0.571213	0.0958157	0.594063	FALSE	94.6982	114.043
sgRNA0312	SPV_2249,SPV_0817	SPV_2249,SPV_0817	0.345852	1.04991	0.741845	0.936961	FALSE	164.688	81.5932
sgRNA0313	SPV_0818,SPV_0819	cmbR,lspA	0.746587	0.62311	0.230853	0.770985	FALSE	84.9145	84.5593
sgRNA0314	SPV_0822	proB	-0.229377	0.375528	0.541323	0.893397	FALSE	190.818	208.041
sgRNA0315	SPV_0825	tmk	2.96716	1.11378	0.00772099	0.121748	FALSE	76.8504	7.68659
sgRNA0316	SPV_2251,SPV_0832	SPV_2251,SPV_0832	-0.143434	0.426219	0.736474	0.935588	FALSE	168.756	178.717
sgRNA0317	SPV_0833	trmFO	-0.410467	0.404023	0.309653	0.819042	FALSE	120.729	168.308
sgRNA0318	SPV_0834	pyrH	3.40215	1.29365	0.0085414	0.132506	FALSE	28.2731	6.17604
sgRNA0319	SPV_0838,SPV_0839,SPV_2252	phoH,SPV_0839,SPV_2252	0.0747603	0.361036	0.835954	0.968062	FALSE	100.639	100.087
sgRNA0320	SPV_0842	SPV_0842	0.018945	0.532577	0.971623	0.994736	FALSE	136.144	147.127
sgRNA0321	SPV_2256,SPV_2257,SPV_0846	SPV_2256,SPV_2257,SPV_0846	-0.891594	0.585372	0.127727	0.628094	FALSE	153.504	165.715
sgRNA0322	SPV_0843,SPV_0844,SPV_2256,SPV_2257,SPV_0846	comEA,comEC,SPV_2256,SPV_2257,SPV_0846	0.451986	0.312642	0.148262	0.665434	FALSE	205.276	193.012
sgRNA0323	SPV_2258	srf-14	3.81131	1.2191	0.00177005	0.0384281	TRUE	34.9042	1.81538
sgRNA0324	SPV_0851,SPV_0852,SPV_0853	pyrK,pyrDb,lytB	-0.366714	0.361125	0.309879	0.819042	FALSE	161.479	174.095
sgRNA0325	SPV_0853	lytB	0.152202	0.491593	0.756857	0.944026	FALSE	143.312	103.975
sgRNA0326	SPV_0854	pavA	0.983935	0.854688	0.249641	0.795642	FALSE	137.748	126.629
sgRNA0327	SPV_0855,SPV_0856	ybeY,dgkA	0.522851	0.472845	0.268832	0.804464	FALSE	153.489	73.2961
sgRNA0328	SPV_0861	secG	0.646752	0.659362	0.326654	0.819042	FALSE	158.752	129.743
sgRNA0329	SPV_0865	coiA	0.204189	0.362577	0.573325	0.901197	FALSE	223.124	232.721
sgRNA0330	SPV_0866,SPV_0867	pepF1,SPV_0867	-0.26277	0.360528	0.466095	0.864783	FALSE	161.187	189.661
sgRNA0331	SPV_0868	prsA	-0.638728	0.360089	0.0760954	0.535168	FALSE	122.48	188.459
sgRNA0332	SPV_0871,SPV_0872	ebsC,SPV_0872	1.0956	0.837775	0.190957	0.71335	FALSE	200.266	150.536
sgRNA0333	SPV_0873	SPV_0873	-0.0280391	0.537271	0.958379	0.993482	FALSE	131.201	179.399
sgRNA0334	SPV_0874,SPV_0875	glmU,SPV_0875	2.10292	0.938602	0.0250595	0.280142	FALSE	63.2153	21.4699
sgRNA0335	SPV_0878	orfX	0.0575407	0.945331	0.951464	0.993482	FALSE	18.572	33.0295
sgRNA0336	SPV_0885,SPV_0886	ccdA-2,SPV_0886	0.608959	0.447299	0.173383	0.699139	FALSE	140.272	90.8768
sgRNA0337	SPV_0886	SPV_0886	0.330088	0.372409	0.375424	0.834293	FALSE	116.418	114.527
sgRNA0338	SPV_0887	yfnA	0.173959	0.397848	0.661931	0.929786	FALSE	101.142	103.033
sgRNA0339	SPV_0888,SPV_2265	lmb,phtD	0.329129	0.845447	0.697057	0.935178	FALSE	56.2169	63.6917
sgRNA0340	SPV_1034,SPV_1033	SPV_1034,SPV_1033	0.164275	0.343498	0.632479	0.925248	FALSE	175.822	159.581
sgRNA0341	SPV_1032,SPV_1031,SPV_1030	ung,mutX,pyrC	-0.168501	0.367914	0.64696	0.927301	FALSE	77.1035	93.8089
sgRNA0342	SPV_1028	acoA	1.17281	0.835074	0.16019	0.682627	FALSE	147.3	99.0184
sgRNA0343	SPV_1023	xerS	0.00712798	0.426326	0.98666	0.995298	FALSE	146.917	138.341
sgRNA0344	SPV_1020,SPV_1019	rnhB,rbgA	1.00352	0.341946	0.00333826	0.0609843	FALSE	179.829	80.6036
sgRNA0345	SPV_1018	zmpA	0.287035	0.467515	0.539242	0.893397	FALSE	129.144	106.007
sgRNA0346	SPV_1017,SPV_1016,SPV_1015	SPV_1017,rexA,rexB	0.658849	0.629794	0.295499	0.817735	FALSE	99.9462	112.839
sgRNA0347	SPV_1012	eno	2.32145	1.53686	0.130912	0.633607	FALSE	21.176	7.61767
sgRNA0348	SPV_1010	SPV_1010	-0.0330273	0.403766	0.934807	0.993344	FALSE	218.76	226.074
sgRNA0349	SPV_1008,SPV_1007	glgA,glgD	-0.473159	0.357231	0.185331	0.699139	FALSE	92.4668	124.568
sgRNA0350	SPV_1008,SPV_1007,SPV_1006,SPV_1005	glgA,glgD,glgC,glgB	-0.317166	0.467971	0.497933	0.878957	FALSE	61.2607	68.8594
sgRNA0351	SPV_1004	gapN	0.611459	0.572023	0.285096	0.814959	FALSE	159.026	136.239
sgRNA0352	SPV_1002,SPV_1001	pulA,ligA	-0.206545	0.614845	0.736924	0.935588	FALSE	73.5182	106.803
sgRNA0353	SPV_1000	SPV_1000	-0.0222839	0.355101	0.949963	0.993482	FALSE	161.832	177.365
sgRNA0354	SPV_1000,SPV_0999,SPV_0998	SPV_1000,rggD,SPV_0998	-0.151267	0.503274	0.763746	0.9474	FALSE	98.5079	95.5138
sgRNA0355	SPV_0997	hlpA	1.03874	0.680065	0.126658	0.628094	FALSE	54.5692	65.9527
sgRNA0356	SPV_0996	SPV_0996	-1.18886	0.805037	0.139735	0.645937	FALSE	87.4074	153.755
sgRNA0357	SPV_0995	SPV_0995	-0.611609	0.429877	0.154807	0.677056	FALSE	192.22	220.001
sgRNA0358	SPV_0994	ribF	1.32226	0.940676	0.159829	0.682627	FALSE	70.7069	48.72
sgRNA0359	SPV_2270	srf-15	3.61764	1.20639	0.00271102	0.0526345	FALSE	30.8583	2.39455
sgRNA0360	SPV_0988	SPV_0988	-1.09395	0.774467	0.157796	0.681205	FALSE	150.623	210.44
sgRNA0361	SPV_0987	SPV_0987	0.105034	0.351584	0.765134	0.948032	FALSE	166.684	137.129
sgRNA0362	SPV_0985,SPV_0984,SPV_0983,SPV_0982	eutD,rluD3,ppnK,SPV_0982	0.169789	0.923535	0.854134	0.968993	FALSE	58.6669	55.7123
sgRNA0363	SPV_0981	SPV_0981	-0.278672	0.546258	0.609948	0.916372	FALSE	120.982	186.129
sgRNA0364	SPV_0980	prs2	-0.0847016	0.574508	0.88279	0.97957	FALSE	88.0253	71.7446
sgRNA0365	SPV_0976,SPV_0974	rex,SPV_0974	0.29528	0.515197	0.566549	0.900946	FALSE	129.598	128.737
sgRNA0366	SPV_0975	radC	0.920809	0.848688	0.277931	0.806861	FALSE	140.473	107.414
sgRNA0367	SPV_0973	pcrA	0.34885	0.462466	0.450654	0.854167	FALSE	48.8211	34.7051
sgRNA0368	SPV_0967	murA-1	1.44685	0.642262	0.0242751	0.279281	FALSE	136.979	46.4371
sgRNA0369	SPV_0963	SPV_0963	-0.380909	1.16814	0.744362	0.938598	FALSE	31.8081	41.865
sgRNA0370	SPV_0960	lafB	-0.199189	0.567121	0.725417	0.935178	FALSE	69.6928	75.1281
sgRNA0371	SPV_0959,SPV_0958,SPV_0957	SPV_0959,rpoD,dnaG	0.241915	1.6263	0.881749	0.979467	FALSE	14.1563	6.72525
sgRNA0372	SPV_0953,SPV_0952	ppc,ftsW	4.76469	0.888619	8.23498e-08	8.81143e-06	TRUE	220.946	6.46559
sgRNA0373	SPV_0939	mutR2	0.227127	0.384274	0.554483	0.896025	FALSE	174.602	161.639
sgRNA0374	SPV_2285,SPV_0931,SPV_0930	SPV_2285,pezT,pezA	0.32112	0.728374	0.659306	0.929786	FALSE	66.5165	73.6485
sgRNA0375	SPV_2285,SPV_0931,SPV_0930,SPV_2286,SPV_2287,SPV_0928	SPV_2285,pezT,pezA,SPV_2286,SPV_2287,SPV_0928	-1.50019	0.888233	0.0912276	0.586519	FALSE	110.439	142.759
sgRNA0376	SPV_2285,SPV_0931,SPV_0930,SPV_2286,SPV_2287,SPV_0927	SPV_2285,pezT,pezA,SPV_2286,SPV_2287,nplT	-0.0358184	0.404386	0.92942	0.992643	FALSE	148.697	144.69
sgRNA0377	SPV_0926	SPV_0926	-0.119505	0.45784	0.794078	0.958168	FALSE	137.999	143.887
sgRNA0378	SPV_0923	SPV_0923	-0.967213	0.836515	0.247583	0.795642	FALSE	67.8701	88.4048
sgRNA0379	SPV_0922,SPV_0921	SPV_0922,ccrB	1.03566	0.905583	0.252773	0.795642	FALSE	125.074	54.3034
sgRNA0380	SPV_0919,SPV_2288,SPV_0918,SPV_0917,SPV_0916,SPV_0915	SPV_0919,SPV_2288,piaD,piaC,piaB,piaA	0.564246	0.813627	0.487999	0.87443	FALSE	48.5515	45.0083
sgRNA0381	SPV_0914	rlmCD	-0.647934	0.387335	0.0943671	0.589008	FALSE	97.2912	135.911
sgRNA0382	SPV_0913	SPV_0913	0.625221	0.751014	0.405125	0.83893	FALSE	65.8296	70.251
sgRNA0383	SPV_0904	tdk	0.178585	0.560401	0.749974	0.94171	FALSE	91.7089	66.3186
sgRNA0384	SPV_0903	xylH	0.349534	0.695671	0.615357	0.917162	FALSE	137.858	136.509
sgRNA0385	SPV_0902	mnmE	0.0227761	0.62648	0.970999	0.994736	FALSE	131.094	132.545
sgRNA0386	SPV_0901,SPV_0900	dapA,asd	-0.228709	0.534665	0.668825	0.932867	FALSE	129.704	143.86
sgRNA0387	SPV_2292	srf-17	0.391305	0.585725	0.504089	0.881139	FALSE	118.423	120.881
sgRNA0388	SPV_0899	tRNA-Thr-1	-0.092371	0.512068	0.856848	0.968993	FALSE	115.301	129.235
sgRNA0389	SPV_0898	queT	0.663494	0.35069	0.0584954	0.464981	FALSE	227.526	175.92
sgRNA0390	SPV_0897	mesH	-0.452343	0.377063	0.230277	0.770985	FALSE	283.039	346.047
sgRNA0391	SPV_0896	mscL	0.710136	0.347883	0.0412204	0.371977	FALSE	168.406	119.447
sgRNA0392	SPV_0895	hemH	0.388114	0.888942	0.6624	0.929786	FALSE	107.671	115.187
sgRNA0393	SPV_0894	pepT	-0.0153157	0.546031	0.977623	0.994736	FALSE	136.166	143.177
sgRNA0394	SPV_0890	phtE	-0.578485	0.574567	0.314022	0.819042	FALSE	129.362	207.545
sgRNA0395	SPV_1039,SPV_1040	ptsI,ptsH	4.62552	1.13062	4.29299e-05	0.00160772	TRUE	25.0654	1.88989
sgRNA0396	SPV_1041,SPV_1042,SPV_1043	nrdH,nrdE,nrdF	1.85008	1.24714	0.137953	0.643055	FALSE	24.4085	11.3924
sgRNA0397	SPV_1043	nrdF	1.02168	0.836779	0.222096	0.766589	FALSE	75.0106	44.7892
sgRNA0398	SPV_1044	lacR	-0.765183	0.39398	0.0521145	0.44106	FALSE	149.755	231.993
sgRNA0399	SPV_2301,SPV_1051,SPV_1052,SPV_1053	lacD,lacC,lacB,lacA	-0.31009	0.406705	0.445795	0.851472	FALSE	94.2279	101.899
sgRNA0400	SPV_2304,SPV_2306	SPV_2304,SPV_2306	-0.175877	0.511193	0.730807	0.935588	FALSE	103.741	114.37
sgRNA0401	SPV_1060	lepA	-0.12411	0.467983	0.790854	0.958168	FALSE	76.8819	85.2163
sgRNA0402	SPV_1064,SPV_1065	SPV_1064,ispA	-0.33433	0.808618	0.679271	0.933782	FALSE	59.6003	53.3201
sgRNA0403	SPV_1067	xseA	1.31544	0.880555	0.135209	0.640959	FALSE	90.8643	48.1962
sgRNA0404	SPV_1068	udk	0.856977	0.578091	0.138227	0.643055	FALSE	86.5852	68.7684
sgRNA0405	SPV_2309	SPV_2309	-0.0638233	0.423667	0.880256	0.979467	FALSE	157.048	175.292
sgRNA0406	SPV_1072	SPV_1072	0.192286	1.01862	0.850273	0.968993	FALSE	79.9794	86.7554
sgRNA0407	SPV_2310,SPV_1074	SPV_2310,SPV_1074	-0.101724	0.44498	0.819177	0.963779	FALSE	221.707	240.442
sgRNA0408	SPV_1075	nirC	-0.339222	0.529715	0.521923	0.887569	FALSE	90.7844	102.913
sgRNA0409	SPV_1077	gyrA	3.33369	0.896459	0.000200227	0.0063817	TRUE	88.5882	20.2989
sgRNA0410	SPV_1078	ldh	-1.40697	0.820628	0.0864364	0.572928	FALSE	54.7404	99.8072
sgRNA0411	SPV_1079	SPV_1079	-0.459001	0.910499	0.614177	0.916372	FALSE	118.776	148.579
sgRNA0412	SPV_1079,SPV_1080	SPV_1079,SPV_1080	-0.527471	0.590847	0.371998	0.834293	FALSE	129.022	137.988
sgRNA0413	SPV_1079,SPV_1080,SPV_1081,SPV_1082	SPV_1079,SPV_1080,relE2,relB2	-0.462891	0.549783	0.399815	0.83893	FALSE	109.561	128.642
sgRNA0414	SPV_1083,SPV_1084,SPV_1085	vicX,vicK,vicR	3.83361	1.10935	0.000548794	0.015224	TRUE	120.819	8.91093
sgRNA0415	SPV_1083,SPV_1084,SPV_1085,SPV_1086	vicX,vicK,vicR,mutY	1.15534	1.02406	0.259237	0.801998	FALSE	102.144	68.2964
sgRNA0416	SPV_1087	fhs	0.0107033	0.609649	0.985993	0.995298	FALSE	76.2276	107.64
sgRNA0417	SPV_1088,SPV_1089,SPV_1090	coaB,coaC,panT	-0.562983	0.511435	0.270988	0.804464	FALSE	97.7995	141.403
sgRNA0418	SPV_1093	niaR	0.0733945	0.371691	0.843467	0.968993	FALSE	281.408	315.31
sgRNA0419	SPV_1091,SPV_1093	niaX,niaR	0.110931	0.497894	0.82369	0.963779	FALSE	139.717	100.091
sgRNA0420	SPV_1096	uvrB	0.73293	0.894861	0.412762	0.83893	FALSE	140.909	112.524
sgRNA0421	SPV_1097	SPV_1097	0.496218	0.495518	0.316627	0.819042	FALSE	101.733	88.7582
sgRNA0422	SPV_1098,SPV_1099	glnHP5,glnQ5	4.40323	1.45466	0.00247002	0.0500012	FALSE	44.4074	5.35469
sgRNA0423	SPV_1100	zwf	0.35044	0.570013	0.538691	0.893397	FALSE	109.144	94.1028
sgRNA0424	SPV_1105	rnc	1.66828	0.879787	0.0579299	0.464981	FALSE	164.244	71.4496
sgRNA0425	SPV_1106,SPV_1107	tRNA-Arg-1,guaC	-0.159386	0.478741	0.739189	0.935588	FALSE	155.122	143.592
sgRNA0426	SPV_1118	cutC	-0.204532	0.470226	0.663588	0.929786	FALSE	145.965	196.586
sgRNA0427	SPV_1118,SPV_1119	cutC,SPV_1119	-0.135265	0.665255	0.838878	0.968993	FALSE	139.761	222.932
sgRNA0428	SPV_1120	topA	0.403377	0.530878	0.447356	0.851472	FALSE	163.995	104.28
sgRNA0429	SPV_1121	SPV_1121	-0.258739	0.426342	0.54393	0.893397	FALSE	105.446	113.538
sgRNA0430	SPV_1122	dprA	-1.04539	0.658502	0.112392	0.610011	FALSE	106.94	139.755
sgRNA0431	SPV_1123,SPV_1124,SPV_1125,SPV_1126,SPV_1127	licC,licB,licA,tarJ,tarI	2.70025	0.590751	4.8568e-06	0.000300696	TRUE	928.253	97.6948
sgRNA0432	SPV_1128	tacF	7.79744	1.47989	1.37217e-07	1.37034e-05	TRUE	1307.21	11.9693
sgRNA0433	SPV_1131,SPV_1132,SPV_1133,SPV_1134	carB,carA,pyrB,pyrR	0.0769833	0.350167	0.82599	0.963779	FALSE	160.401	150.475
sgRNA0434	SPV_1136	SPV_1136	0.442195	0.691325	0.52241	0.887569	FALSE	147.169	103.709
sgRNA0435	SPV_2315,SPV_2316	SPV_2315,SPV_2316	-0.629873	0.841842	0.454335	0.855515	FALSE	94.3794	110.63
sgRNA0436	SPV_2317	srf-19	-1.05513	0.619837	0.0887052	0.582809	FALSE	97.4349	124.065
sgRNA0437	SPV_1138,SPV_1139	htpX,lemA	-0.337438	0.412293	0.413105	0.83893	FALSE	169.714	204.491
sgRNA0438	SPV_1140	rsmG	-0.20509	0.399691	0.607866	0.915855	FALSE	178.242	184.603
sgRNA0439	SPV_1141	uraA	0.236456	0.360537	0.511923	0.883327	FALSE	138.176	150.93
sgRNA0440	SPV_1143	SPV_1143	1.60345	1.38748	0.247822	0.795642	FALSE	51.0675	29.2473
sgRNA0441	SPV_1144	SPV_1144	0.0430027	0.352029	0.902775	0.983057	FALSE	205.721	199.713
sgRNA0442	SPV_1145,SPV_1146	SPV_1145,yidA	1.15868	1.04985	0.269738	0.804464	FALSE	97.8484	107.15
sgRNA0443	SPV_1148	rplS	1.83125	0.663927	0.00581179	0.0946311	FALSE	52.3638	21.4953
sgRNA0444	SPV_1149,SPV_1150,SPV_1151	crcB1,crcB2,SPV_1151	0.419195	0.424024	0.322853	0.819042	FALSE	166.092	160.035
sgRNA0445	SPV_1152	fld	-0.392208	0.537691	0.465739	0.864783	FALSE	100.15	100.862
sgRNA0446	SPV_1153	pde2	1.34514	0.638068	0.0350184	0.343267	FALSE	113.636	78.7036
sgRNA0447	SPV_1154	rpmE2	-0.792545	1.15182	0.491403	0.876586	FALSE	17.6588	29.4493
sgRNA0448	SPV_1158	gdhA	-0.188861	0.405187	0.641138	0.927301	FALSE	67.2778	106.064
sgRNA0449	SPV_1180,SPV_2327,SPV_1182,SPV_2328,SPV_2329,SPV_1185	SPV_1180,SPV_2327,SPV_1182,SPV_2328,SPV_2329,SPV_1185	-0.136135	0.647636	0.833509	0.967417	FALSE	93.9954	94.3229
sgRNA0450	SPV_2330	srf-20	2.22913	1.2614	0.0771971	0.540379	FALSE	12.8891	0.629964
sgRNA0451	SPV_1190	trzA	1.24965	0.813911	0.124694	0.62549	FALSE	190.099	116.783
sgRNA0452	SPV_1193	msrAB1	1.39955	0.816106	0.0863622	0.572928	FALSE	82.5823	41.2267
sgRNA0453	SPV_1193,SPV_2331,SPV_1194,SPV_1195	msrAB1,SPV_2331,thrB,hom	-0.0114045	0.4956	0.981641	0.994736	FALSE	96.4448	77.7572
sgRNA0454	SPV_1196	mecA	0.167271	0.317035	0.59777	0.910946	FALSE	236.475	194.838
sgRNA0455	SPV_1197,SPV_1198,SPV_1199,SPV_1200,SPV_1201	tarQ,tarP,cps23FU,SPV_1200,licD3	8.15189	1.07111	2.72583e-14	1.02082e-11	TRUE	737.228	0.314982
sgRNA0456	SPV_1202,SPV_1203,SPV_1204,SPV_1205	psr,pheA,aroK,aroA	1.96528	0.53813	0.000260145	0.00811869	TRUE	204.006	65.1335
sgRNA0457	SPV_1212	ywbD	1.90336	0.854612	0.0259364	0.287626	FALSE	142.597	46.055
sgRNA0458	SPV_1213,SPV_1214	SPV_1213,SPV_1214	-0.358406	0.348428	0.30365	0.819042	FALSE	132.539	177.33
sgRNA0459	SPV_1215	amy	-0.439776	0.428803	0.305085	0.819042	FALSE	171.924	185.241
sgRNA0460	SPV_1216,SPV_1217	alaS,SPV_1217	-0.252439	0.997651	0.800242	0.958168	FALSE	19.1175	26.3171
sgRNA0461	SPV_1218,SPV_1219,SPV_1220,SPV_1221,SPV_1222	potD,potC,potB,potA,murB	3.36392	3.00449	0.262871	0.801998	FALSE	2.43915	0
sgRNA0462	SPV_1224	budA	0.134799	0.604128	0.823435	0.963779	FALSE	117.874	128.85
sgRNA0463	SPV_1226	SPV_1226	-0.72503	0.652772	0.2667	0.804464	FALSE	43.7964	95.8886
sgRNA0464	SPV_1234,SPV_1235,SPV_1236	SPV_1234,SPV_1235,spxA1	-0.46643	0.464243	0.315036	0.819042	FALSE	159.435	182.048
sgRNA0465	SPV_1238,SPV_1239,SPV_1240	nagD,SPV_1239,hemN	-0.0183577	0.348953	0.958044	0.993482	FALSE	238.653	251.719
sgRNA0466	SPV_1243,SPV_1244	lgt,hprK	0.363149	0.401818	0.36612	0.832705	FALSE	138.989	94.6826
sgRNA0467	SPV_1245	rpsU	2.14255	0.964382	0.026305	0.287626	FALSE	82.0317	35.8473
sgRNA0468	SPV_1246	nagB	0.250165	0.529354	0.636509	0.926678	FALSE	140.358	139.595
sgRNA0469	SPV_1247	queA	-1.13808	0.555185	0.0403735	0.369285	FALSE	173.886	228.181
sgRNA0470	SPV_1249,SPV_1250,SPV_1251	SPV_1249,nadE,pncB	0.110772	0.451046	0.806001	0.959769	FALSE	158.76	191.987
sgRNA0471	SPV_1258	SPV_1258	-0.134369	0.353354	0.703746	0.935178	FALSE	153.832	167.507
sgRNA0472	SPV_1259,SPV_1260,SPV_2335	SPV_1259,SPV_1260,SPV_2335	-0.696406	0.837079	0.405439	0.83893	FALSE	130.812	154.681
sgRNA0473	SPV_1262	SPV_1262	-0.374025	0.360181	0.299067	0.817735	FALSE	140.086	177.634
sgRNA0474	SPV_1273	SPV_1273	-0.712333	0.468076	0.128051	0.628094	FALSE	226.736	266.929
sgRNA0475	SPV_1274	guaA	-0.447109	0.546342	0.413147	0.83893	FALSE	240.318	275.943
sgRNA0476	SPV_1278	cppA	-0.274122	0.834146	0.742438	0.936961	FALSE	132.001	155.748
sgRNA0477	SPV_1280,SPV_2338	SPV_1280,capA	0.412959	0.87081	0.63534	0.926678	FALSE	91.1629	102.085
sgRNA0478	SPV_1285	def1	0.308953	0.90052	0.731536	0.935588	FALSE	121.016	131.082
sgRNA0479	SPV_1286	trmH	0.0540556	0.244492	0.82502	0.963779	FALSE	269.462	272.269
sgRNA0480	SPV_1287	trxB	0.457324	0.566249	0.419299	0.840843	FALSE	79.3478	65.7222
sgRNA0481	SPV_1288	SPV_1288	1.04136	0.654439	0.111558	0.609907	FALSE	182.668	96.0699
sgRNA0482	SPV_1289,SPV_1290	SPV_1289,SPV_1290	0.449277	0.542159	0.407285	0.83893	FALSE	57.3064	43.2096
sgRNA0483	SPV_1291,SPV_1292,SPV_1293	SPV_1291,ogt,SPV_1293	-0.50679	0.644954	0.431999	0.845021	FALSE	61.6643	62.6537
sgRNA0484	SPV_1294,SPV_1295	SPV_1294,SPV_1295	-0.0391071	0.605908	0.948538	0.993482	FALSE	192.998	200.176
sgRNA0485	SPV_1298	nox	0.682379	0.407233	0.0938071	0.587963	FALSE	227.359	177.523
sgRNA0486	SPV_1300,SPV_1301,SPV_1302	apbE,SPV_1301,SPV_1302	0.513485	0.605991	0.396801	0.83893	FALSE	97.5328	63.9706
sgRNA0487	SPV_1303,SPV_1304,SPV_1305,SPV_2339,SPV_1307	SPV_1303,glyS,glyQ,SPV_2339,SPV_1307	0.391908	0.898942	0.662862	0.929786	FALSE	36.1832	24.9733
sgRNA0488	SPV_1308	SPV_1308	-0.743691	0.851875	0.382661	0.834293	FALSE	77.4447	117.647
sgRNA0489	SPV_1308,SPV_1309	SPV_1308,pgdA	0.088212	0.464686	0.849441	0.968993	FALSE	139.414	124.301
sgRNA0490	SPV_1308,SPV_1309,SPV_2340	SPV_1308,pgdA,SPV_2340	-0.54523	0.555766	0.326572	0.819042	FALSE	122.086	128.011
sgRNA0491	SPV_1311	mocA	-0.9013	0.806268	0.263624	0.802661	FALSE	123.4	186.265
sgRNA0492	SPV_1318	tuf	1.60998	0.98293	0.101434	0.599236	FALSE	65.6795	18.0954
sgRNA0493	SPV_1320	SPV_1320	-0.691327	0.720334	0.33719	0.825468	FALSE	133.193	324.187
sgRNA0494	SPV_1326	pgm	-0.164376	0.681752	0.809472	0.960053	FALSE	1173.89	2898.39
sgRNA0495	SPV_1327	bta	2.38194	0.83775	0.00446546	0.0760143	FALSE	652.497	128.917
sgRNA0496	SPV_1328,SPV_1329,SPV_1330	glnH6,glnQ6,glnP6	-0.310407	0.375471	0.4084	0.83893	FALSE	169.387	191.446
sgRNA0497	SPV_1331,SPV_1332	SPV_1331,SPV_1332	0.604476	0.500655	0.227289	0.770316	FALSE	109.332	83.6745
sgRNA0498	SPV_1333	SPV_1333	-0.437713	0.329622	0.184204	0.699139	FALSE	187.915	221.782
sgRNA0499	SPV_1334,SPV_1335,SPV_1336,SPV_1337,SPV_1338,SPV_1339,SPV_1340,SPV_1341	atpC,atpD,atpG,atpA,atpH,atpF,atpB,atpE	1.22796	0.873029	0.15956	0.682627	FALSE	49.7377	31.1804
sgRNA0500	SPV_1345,SPV_1346	greA,mltG	1.908	0.80006	0.0170874	0.220663	FALSE	315.583	146.865
sgRNA0501	SPV_1350	SPV_1350	1.74926	1.48884	0.24003	0.783367	FALSE	15.3293	13.9934
sgRNA0502	SPV_1351	snf	0.277355	0.438983	0.52751	0.889875	FALSE	297.103	259.518
sgRNA0503	SPV_1352,SPV_1353	patB2,metB	0.544928	0.603245	0.366352	0.832705	FALSE	68.6387	50.2719
sgRNA0504	SPV_1357	aliB	0.194718	0.604084	0.747198	0.939012	FALSE	82.7244	71.1476
sgRNA0505	SPV_1358	ytgP	1.48262	0.566446	0.00886	0.134294	FALSE	584.682	172.803
sgRNA0506	SPV_1359	murE	1.18379	1.89507	0.532189	0.890427	FALSE	3.74003	0.629964
sgRNA0507	SPV_1360	SPV_1360	0.797494	0.483761	0.0992447	0.596113	FALSE	80.1993	49.3401
sgRNA0508	SPV_1363	ppaC	0.642247	1.04644	0.539386	0.893397	FALSE	73.5069	82.2012
sgRNA0509	SPV_1364,SPV_1365	SPV_1364,SPV_1365	0.316436	0.508296	0.533585	0.891092	FALSE	222.044	226.778
sgRNA0510	SPV_1364,SPV_1365,SPV_1366,SPV_1367	SPV_1364,SPV_1365,SPV_1366,SPV_1367	1.90092	0.827892	0.0216706	0.255611	FALSE	252.442	81.8195
sgRNA0511	SPV_1368,SPV_1369	rpsR,ssbA	1.37858	0.717938	0.0548327	0.453809	FALSE	101.003	50.1519
sgRNA0512	SPV_1370	rpsF	4.89846	1.24273	8.09103e-05	0.00295619	TRUE	47.4435	1.57491
sgRNA0513	SPV_1371	asnC	1.38389	1.29742	0.286129	0.814959	FALSE	35.738	24.2948
sgRNA0514	SPV_1374	SPV_1374	0.139218	1.11837	0.900933	0.983057	FALSE	19.8222	20.2901
sgRNA0515	SPV_1375	SPV_1375	0.641376	0.405558	0.113772	0.612909	FALSE	195.018	144.298
sgRNA0516	SPV_1378	yaaA	0.381681	0.8395	0.649359	0.927301	FALSE	132.087	130.331
sgRNA0517	SPV_1379	SPV_1379	-0.467356	0.506078	0.355753	0.832705	FALSE	142.981	153.389
sgRNA0518	SPV_1379,SPV_1380,SPV_1381	SPV_1379,SPV_1380,def2	-0.414743	0.490984	0.398269	0.83893	FALSE	171.769	187.63
sgRNA0519	SPV_1382,SPV_1383	SPV_1382,pacL	1.57748	0.750512	0.035564	0.343267	FALSE	149.672	80.8065
sgRNA0520	SPV_1384	mntE	0.0340081	0.729116	0.962798	0.993482	FALSE	80.3205	95.3488
sgRNA0521	SPV_1385,SPV_1386,SPV_1387,SPV_1388,SPV_1389	SPV_1385,cca,dapB,SPV_1388,SPV_1389	0.632882	0.52183	0.225201	0.768382	FALSE	70.8369	56.4272
sgRNA0522	SPV_1390,SPV_1391,SPV_1392	glmM,SPV_1391,disA	4.52859	1.08909	3.20875e-05	0.00129911	TRUE	120.442	5.23024
sgRNA0523	SPV_1394,SPV_1395,SPV_1396	SPV_1394,SPV_1395,SPV_1396	-0.675798	0.322239	0.0359766	0.343267	FALSE	188.815	295.454
sgRNA0524	SPV_1401	folA	1.1066	0.814305	0.174162	0.699139	FALSE	16.7572	10.7263
sgRNA0525	SPV_1402	dpr	-0.165789	0.578142	0.774294	0.953021	FALSE	83.1586	79.3909
sgRNA0526	SPV_1403,SPV_1404	lytC,tpiA	-1.03086	0.967835	0.286823	0.814959	FALSE	39.956	57.2006
sgRNA0527	SPV_1405,SPV_1406	dnaD,metA	-0.688752	0.76583	0.368464	0.832705	FALSE	27.1299	31.1497
sgRNA0528	SPV_1407	apt	0.289766	0.636211	0.648782	0.927301	FALSE	72.883	46.4872
sgRNA0529	SPV_1408	SPV_1408	0.313263	0.338222	0.35434	0.832705	FALSE	144.194	120.26
sgRNA0530	SPV_1409	msmK	0.0873594	0.502575	0.862004	0.970159	FALSE	83.0334	66.0431
sgRNA0531	SPV_1410	tRNA-Leu-1	-0.154958	0.76931	0.840366	0.968993	FALSE	89.3845	66.2611
sgRNA0532	SPV_1411,SPV_1412	SPV_1411,codY	0.708862	0.432347	0.101095	0.599236	FALSE	482.045	285.162
sgRNA0533	SPV_1413	cshA	0.505363	0.390129	0.195191	0.716456	FALSE	255.105	211.996
sgRNA0534	SPV_1415	merA	-0.248598	0.437751	0.570104	0.901197	FALSE	125.643	138.123
sgRNA0535	SPV_1416,SPV_1417	murT,gatD	2.57104	0.77278	0.000877848	0.0222884	TRUE	597.918	105.252
sgRNA0536	SPV_1418,SPV_1419	pepQ,SPV_1419	0.513341	0.384045	0.181331	0.699139	FALSE	209.714	174.388
sgRNA0537	SPV_1420,SPV_1421,SPV_2360	SPV_1420,SPV_1421,SPV_2360	0.451662	0.423873	0.286622	0.814959	FALSE	273.388	234.251
sgRNA0538	SPV_1422,SPV_1423,SPV_1424	pdxU2,pdxK,truA	-0.321223	0.549257	0.558661	0.900946	FALSE	64.6608	113.674
sgRNA0539	SPV_1427	phnA	-0.891858	0.502738	0.0760628	0.535168	FALSE	51.0163	85.4498
sgRNA0540	SPV_1430	fer	0.687822	0.335631	0.0404291	0.369285	FALSE	221.299	118.049
sgRNA0541	SPV_1429	SPV_1429	0.466101	0.897182	0.6034	0.915799	FALSE	36.0884	34.2347
sgRNA0542	SPV_1431,SPV_1432	gtrB,galE-1	1.22912	0.568	0.0304685	0.310489	FALSE	174.22	52.5479
sgRNA0543	SPV_1435	SPV_1435	-0.869238	0.462943	0.0604315	0.469855	FALSE	55.7857	84.7601
sgRNA0544	SPV_1436	ctpE	1.8641	1.16577	0.109814	0.608622	FALSE	157.091	41.9817
sgRNA0545	SPV_1437	plsC	0.518806	0.734841	0.480181	0.870029	FALSE	63.8246	56.3918
sgRNA0546	SPV_1438	cadD	0.329698	0.900287	0.714205	0.935178	FALSE	109.991	97.9672
sgRNA0547	SPV_1439	rpsO	-0.0622436	0.529094	0.906351	0.983057	FALSE	86.9503	128.395
sgRNA0548	SPV_2364	SPV_2364	0.0668476	0.57951	0.908166	0.983057	FALSE	74.8449	96.7719
sgRNA0549	SPV_2365,SPV_1444,SPV_1442	SPV_2365,thrS,SPV_1442	1.08297	0.852678	0.204058	0.739538	FALSE	35.8603	31.2956
sgRNA0550	SPV_1445,SPV_1446	SPV_1445,SPV_1446	-0.563299	0.472026	0.232727	0.773003	FALSE	95.2154	119.343
sgRNA0551	SPV_1447	SPV_1447	0.692916	0.768265	0.367097	0.832705	FALSE	195.908	172.455
sgRNA0552	SPV_2366	SPV_2366	-0.143376	0.317727	0.651806	0.928526	FALSE	156.861	204.185
sgRNA0553	SPV_1448	SPV_1448	-0.936826	0.509809	0.0661211	0.487928	FALSE	78.2664	138.13
sgRNA0554	SPV_1449	SPV_1449	-0.668139	0.498104	0.179802	0.699139	FALSE	166.249	193.942
sgRNA0555	SPV_1450,SPV_1451	mntR,SPV_1451	0.624967	0.602249	0.299399	0.817735	FALSE	140.754	111.799
sgRNA0556	SPV_2369,SPV_2370	SPV_2369,SPV_2370	-0.518577	0.365871	0.156373	0.677806	FALSE	105.575	136.781
sgRNA0557	SPV_1458	relA	-1.61195	0.6582	0.0143242	0.188689	FALSE	57.5616	191.724
sgRNA0558	SPV_1459	SPV_1459	0.544362	0.801997	0.497291	0.878957	FALSE	104.153	124.249
sgRNA0559	SPV_1460	pepO	0.228855	0.366693	0.532558	0.890427	FALSE	169.778	141.171
sgRNA0560	SPV_1461,SPV_1462,SPV_1463	psaB,psaC,psaA	0.106437	0.507049	0.833735	0.967417	FALSE	201.473	180.393
sgRNA0561	SPV_1464	psaD	-0.475637	0.49623	0.33781	0.825468	FALSE	130.86	124.681
sgRNA0562	SPV_1466	SPV_1466	0.553105	0.394961	0.161393	0.683794	FALSE	89.965	61.9806
sgRNA0563	SPV_1467	SPV_1467	0.0109106	0.525105	0.983423	0.994736	FALSE	146.441	150.396
sgRNA0564	SPV_1468	gpmA	-0.724527	0.650313	0.265228	0.804464	FALSE	33.0252	78.8596
sgRNA0565	SPV_1479,SPV_1480	ftsZ,ftsA	5.22051	1.80391	0.0038038	0.0670363	FALSE	25.8152	0
sgRNA0566	SPV_1481	SPV_1481	-0.119388	0.277121	0.666602	0.931501	FALSE	210.253	216.378
sgRNA0567	SPV_1484	ddl	4.79103	1.53806	0.00183955	0.0393664	TRUE	35.7426	0
sgRNA0568	SPV_1486	pbp2b	2.03454	0.457255	8.60841e-06	0.000444669	TRUE	372.271	95.4897
sgRNA0569	SPV_1487	nanR	0.734308	0.746325	0.325165	0.819042	FALSE	178.498	167.463
sgRNA0570	SPV_1504,SPV_1505	nanA,SPV_1505	0.684376	0.430862	0.112198	0.610011	FALSE	192.881	133.411
sgRNA0571	SPV_1506	axe1	-0.122278	0.256983	0.634202	0.925959	FALSE	225.736	225.007
sgRNA0572	SPV_2378	srf-21	0.507836	0.574793	0.37696	0.834293	FALSE	119.354	131.436
sgRNA0573	SPV_1512	secA	4.09276	0.6898	2.96973e-09	4.44865e-07	TRUE	242.714	19.8299
sgRNA0574	SPV_1518	SPV_1518	-0.176641	0.787543	0.822529	0.963779	FALSE	98.2518	106.236
sgRNA0575	SPV_2382	SPV_2382	0.888835	0.798836	0.265853	0.804464	FALSE	115.838	98.7554
sgRNA0576	SPV_1522,SPV_1523	dnaB,nrdR	-0.728559	0.806827	0.366529	0.832705	FALSE	8.97588	14.668
sgRNA0577	SPV_1524,SPV_1525,SPV_1526	gntR,SPV_1525,SPV_1526	-0.244349	0.52557	0.641987	0.927301	FALSE	81.2189	113.759
sgRNA0578	SPV_2383,SPV_1527,SPV_1528	srf-22,qsrB,qsrA	-0.351001	0.319764	0.272342	0.804464	FALSE	121.751	149.457
sgRNA0579	SPV_1530	SPV_1530	0.396725	0.546153	0.467595	0.86583	FALSE	157.414	142.909
sgRNA0580	SPV_1531	scrK	0.401302	0.592049	0.497887	0.878957	FALSE	151.317	75.6192
sgRNA0581	SPV_1532	scrA	0.924452	0.580858	0.111491	0.609907	FALSE	85.3646	31.3263
sgRNA0582	SPV_1534,SPV_1535	scrB,scrR	0.109245	0.50099	0.827383	0.963779	FALSE	99.5415	92.6532
sgRNA0583	SPV_1536,SPV_1537	mvaA,mvaS	4.32422	0.42864	6.22911e-24	9.33121e-21	TRUE	1666.01	88.4589
sgRNA0584	SPV_1538	SPV_1538	-0.267753	0.703123	0.703348	0.935178	FALSE	67.4921	68.7782
sgRNA0585	SPV_1541	SPV_1541	-0.128572	0.325162	0.692541	0.935178	FALSE	159.069	196.391
sgRNA0586	SPV_1542,SPV_1543	stkP,phpP	0.160569	0.772539	0.83535	0.968062	FALSE	73.1928	53.3346
sgRNA0587	SPV_1547,SPV_1548	rpoZ,gmk	-0.468388	1.04934	0.655335	0.928753	FALSE	10.3014	33.3883
sgRNA0588	SPV_1549	rny	0.21999	0.402765	0.58493	0.906277	FALSE	163.695	125.888
sgRNA0589	SPV_1550,SPV_1551	yoeB,yefM	0.691884	0.667819	0.300186	0.817735	FALSE	137.705	85.0365
sgRNA0590	SPV_1555,SPV_1556,SPV_1557,SPV_1558,SPV_1559,SPV_1560,SPV_1561	SPV_1555,yqeK,nadD,SPV_1558,yqeH,SPV_1560,corA2	2.85287	0.984202	0.00374759	0.0668321	FALSE	53.1873	13.533
sgRNA0591	SPV_1555,SPV_1556,SPV_1557,SPV_1558,SPV_1559,SPV_1560,SPV_1561,SPV_1562	SPV_1555,yqeK,nadD,SPV_1558,yqeH,SPV_1560,corA2,SPV_1562	0.0710237	0.578046	0.902211	0.983057	FALSE	75.7327	94.1139
sgRNA0592	SPV_2388	SPV_2388	0.0626776	0.624295	0.920029	0.989378	FALSE	123.584	119.158
sgRNA0593	SPV_1565	SPV_1565	-0.378402	0.572306	0.508491	0.88263	FALSE	106.401	132.512
sgRNA0594	SPV_1566,SPV_1567	SPV_1566,trxA	0.435806	0.442446	0.324627	0.819042	FALSE	178.016	168.454
sgRNA0595	SPV_1569	aqpZ	1.07756	0.465354	0.0205821	0.246656	FALSE	197.087	104.92
sgRNA0596	SPV_1576	SPV_1576	0.0610152	0.502738	0.903401	0.983057	FALSE	159.879	154.241
sgRNA0597	SPV_2391	hicA	0.862317	0.43215	0.0459979	0.398294	FALSE	165.56	88.9932
sgRNA0598	SPV_1578,SPV_1579	SPV_1578,SPV_1579	0.531441	0.470971	0.259154	0.801998	FALSE	127.332	89.1008
sgRNA0599	SPV_1580,SPV_2392,SPV_1581	SPV_1580,ssrS,tRNA-Lys-1	0.169912	0.348675	0.62604	0.922132	FALSE	233.909	225.886
sgRNA0600	SPV_2392,SPV_1581	ssrS,tRNA-Lys-1	-0.973487	0.831033	0.241431	0.784977	FALSE	38.1476	67.0244
sgRNA0601	SPV_1582,SPV_1583,SPV_1584,SPV_1585	sacA,SPV_1583,SPV_1584,SPV_1585	-0.208427	0.351914	0.55367	0.896025	FALSE	193.892	180.15
sgRNA0602	SPV_1586	SPV_1586	0.40358	0.383542	0.292687	0.817735	FALSE	225.219	189.621
sgRNA0603	SPV_2393,SPV_1588,SPV_1589,SPV_1590,SPV_1591	SPV_2393,SPV_1588,SPV_1589,gls24,SPV_1591	-0.0955728	0.462333	0.83623	0.968062	FALSE	122.613	174.346
sgRNA0604	SPV_1592	SPV_1592	-0.531055	0.534859	0.320764	0.819042	FALSE	146.56	165.658
sgRNA0605	SPV_1593	cclA	0.706693	0.888179	0.426227	0.843134	FALSE	93.25	69.1261
sgRNA0606	SPV_1594,SPV_1595	SPV_1594,SPV_1595	1.54455	0.499468	0.00198548	0.0415859	TRUE	115.75	28.7948
sgRNA0607	SPV_1596,SPV_1597,SPV_1598,SPV_1599,SPV_1600,SPV_1601,SPV_1602	trpA,trpB,trpF,trpC,trpD,trpG,trpE	0.0261382	0.357417	0.941702	0.993482	FALSE	160.492	160.618
sgRNA0608	SPV_1603	SPV_1603	-0.955209	0.367215	0.00928903	0.13915	FALSE	167.1	261.095
sgRNA0609	SPV_1606,SPV_1607,SPV_1608,SPV_1609,SPV_1610	mgtC,sfuB,SPV_1608,SPV_1609,SPV_1610	0.0578963	0.420625	0.890522	0.982441	FALSE	139.773	150.291
sgRNA0610	SPV_1606,SPV_1607,SPV_1608,SPV_1609,SPV_1610,SPV_1612,SPV_1613,SPV_1614,SPV_2396,SPV_1617	mgtC,sfuB,SPV_1608,SPV_1609,SPV_1610,galE-2,galT-1,phoU3,SPV_2396,pfbA	0.350035	0.427866	0.413303	0.83893	FALSE	163.405	147.687
sgRNA0611	SPV_1619,SPV_1620	aatB,SPV_1620	4.70787	1.03152	5.0183e-06	0.000300696	TRUE	129.214	6.76443
sgRNA0612	SPV_2397,SPV_2398,SPV_1625	SPV_2397,SPV_2398,SPV_1625	-0.226582	0.555197	0.683193	0.934749	FALSE	86.0992	111.589
sgRNA0613	SPV_1626	exoA	0.770161	0.412752	0.0620531	0.471856	FALSE	206.986	138.335
sgRNA0614	SPV_1628,SPV_1629	xpt,pbuX	0.342455	0.393155	0.38373	0.834293	FALSE	153.976	159.093
sgRNA0615	SPV_1630,SPV_1631	dpnD,dpnC	-0.224444	0.396007	0.570873	0.901197	FALSE	160.434	172.201
sgRNA0616	SPV_1632	paaI	0.10291	0.383241	0.788294	0.957717	FALSE	149.858	132.876
sgRNA0617	SPV_1635	galR	0.120359	0.314377	0.701831	0.935178	FALSE	206.731	197.026
sgRNA0618	SPV_1636,SPV_1637	adhB,nmlR	-0.743961	0.824136	0.366677	0.832705	FALSE	106.81	120.658
sgRNA0619	SPV_1636,SPV_1637,SPV_1638	adhB,nmlR,czcD	0.177365	0.533354	0.739477	0.935588	FALSE	127.02	130.931
sgRNA0620	SPV_1642,SPV_1643,SPV_1644,SPV_1645	proWX,proV,SPV_1644,SPV_1645	-0.51893	1.13802	0.648395	0.927301	FALSE	78.9685	110.774
sgRNA0621	SPV_1646,SPV_1647	SPV_1646,pepA	-0.762932	0.775734	0.325363	0.819042	FALSE	122.79	138.579
sgRNA0622	SPV_1649,SPV_1650,SPV_1651,SPV_1652	piuB,piuC,piuD,piuA	-0.366965	0.47391	0.438733	0.845021	FALSE	106.786	96.5564
sgRNA0623	SPV_1658,SPV_1659,SPV_1660,SPV_1661	SPV_1658,SPV_1659,rdgB,murI	1.88401	0.64765	0.00362599	0.0654426	FALSE	227.674	55.0813
sgRNA0624	SPV_1662	SPV_1662	0.546001	0.417348	0.190785	0.71335	FALSE	341.699	245.709
sgRNA0625	SPV_1663	treC	-0.180134	0.441853	0.68351	0.934749	FALSE	180.583	146.689
sgRNA0626	SPV_1665	treR	-1.14739	0.524653	0.0287459	0.302834	FALSE	133.44	187.427
sgRNA0627	SPV_1671	amiA	-0.572337	0.667636	0.391302	0.837386	FALSE	28.6302	40.8546
sgRNA0628	SPV_1672	tacL	4.37528	0.501917	2.85294e-18	1.42457e-15	TRUE	1473.72	80.0739
sgRNA0629	SPV_1679,SPV_1680	msmR,birA	1.38854	0.817252	0.0893126	0.584237	FALSE	95.3445	80.1154
sgRNA0630	SPV_1704	rumA-2	-0.140493	0.548392	0.797803	0.958168	FALSE	169.918	147.315
sgRNA0631	SPV_1705	recX	0.881921	0.465324	0.0580549	0.464981	FALSE	200.772	106.418
sgRNA0632	SPV_1706	SPV_1706	0.0880347	0.403503	0.827292	0.963779	FALSE	346.347	321.171
sgRNA0633	SPV_1709,SPV_1710	groEL,groES	-0.465042	0.383847	0.225693	0.768382	FALSE	301.597	300.11
sgRNA0634	SPV_1711	ssbB	1.07257	0.578768	0.063855	0.480677	FALSE	146.991	60.216
sgRNA0635	SPV_1715	SPV_1715	-0.138645	0.54215	0.798158	0.958168	FALSE	71.6035	88.4317
sgRNA0636	SPV_1716,SPV_1717,SPV_1718	SPV_1716,SPV_1717,SPV_1718	0.0342079	0.628196	0.956573	0.993482	FALSE	122.116	147.04
sgRNA0637	SPV_1719,SPV_1720	SPV_1719,SPV_1720	0.316482	0.401488	0.430537	0.844168	FALSE	328.551	249.566
sgRNA0638	SPV_1725	yeeN	0.215739	0.360643	0.549703	0.893397	FALSE	151.579	146.131
sgRNA0639	SPV_1726,SPV_1727,SPV_1728,SPV_1729	ply,SPV_1727,SPV_1728,SPV_1729	0.370641	0.368352	0.314313	0.819042	FALSE	215.27	168.677
sgRNA0640	SPV_1737	lytA	0.728821	0.682015	0.285237	0.814959	FALSE	92.8149	86.8031
sgRNA0641	SPV_1737,SPV_1738	lytA,dinF	0.549092	0.343671	0.110105	0.608622	FALSE	167.164	114.901
sgRNA0642	SPV_1737,SPV_1738,SPV_1739	lytA,dinF,recA	0.305342	0.873038	0.726529	0.935178	FALSE	130.888	120.399
sgRNA0643	SPV_1737,SPV_1738,SPV_1739,SPV_1740	lytA,dinF,recA,cinA	0.113512	0.648826	0.861119	0.970159	FALSE	92.9781	92.0868
sgRNA0644	SPV_1741,SPV_1742,SPV_1743	lytR,SPV_1742,tsaE	1.60046	1.06451	0.132717	0.638873	FALSE	65.6488	19.6625
sgRNA0645	SPV_1741,SPV_1742,SPV_1743,SPV_1744	lytR,SPV_1742,tsaE,comM	-0.28794	0.559269	0.606657	0.915855	FALSE	132.34	142.182
sgRNA0646	SPV_1745	plcR	0.00661412	0.388559	0.986419	0.995298	FALSE	170.614	166.382
sgRNA0647	SPV_1746,SPV_1747,SPV_1748,SPV_1749,SPV_1750,SPV_1751,SPV_1752,SPV_1753,SPV_1754,SPV_1755,SPV_2420	SPV_1746,pneA1,pneA2,lanM,wrbA,SPV_1751,clyB,SPV_1753,SPV_1754,SPV_1755,SPV_2420	0.112696	0.502387	0.822508	0.963779	FALSE	105.18	118.393
sgRNA0648	SPV_1757	ndk	2.01996	0.982714	0.0398318	0.368321	FALSE	80.5033	63.0065
sgRNA0649	SPV_2421	srf-23	0.529515	1.24969	0.671772	0.933209	FALSE	4.57491	1.94521
sgRNA0650	SPV_1760	tRNA-Cys-1	1.24554	0.844672	0.140326	0.645937	FALSE	38.3835	22.2677
sgRNA0651	SPV_1761	hlyX	1.3612	0.869459	0.11745	0.61303	FALSE	98.7191	54.3839
sgRNA0652	SPV_2422	SPV_2422	0.272359	0.592679	0.645847	0.927301	FALSE	103.592	53.1205
sgRNA0653	SPV_1765,SPV_1766,SPV_1767	SPV_1765,coaD,SPV_1767	0.0283066	0.461258	0.951066	0.993482	FALSE	149.195	171.784
sgRNA0654	SPV_1768	asnA	1.15953	0.933781	0.214327	0.754254	FALSE	200.93	161.322
sgRNA0655	SPV_1769	SPV_1769	-0.0166003	0.341215	0.961198	0.993482	FALSE	126.365	141.832
sgRNA0656	SPV_1771	yjfA	0.821719	0.576011	0.153705	0.675218	FALSE	144.782	130.702
sgRNA0657	SPV_1772	acyP	0.182306	0.328212	0.578585	0.902833	FALSE	180.5	185.461
sgRNA0658	SPV_1773	yidC1	0.0571827	0.385382	0.882043	0.979467	FALSE	239.601	254.527
sgRNA0659	SPV_1774	pflA	-0.318658	0.89856	0.722866	0.935178	FALSE	92.9915	133.887
sgRNA0660	SPV_1776	purR	-1.74062	0.451607	0.000116072	0.00386391	TRUE	62.8827	136.537
sgRNA0661	SPV_1777,SPV_1778	yhaM,rmuC	0.299634	0.287982	0.298126	0.817735	FALSE	249.821	224.68
sgRNA0662	SPV_1779,SPV_1780,SPV_1781,SPV_1782	SPV_1779,rpe,rsgA,ksgA	0.806577	0.581311	0.165285	0.69083	FALSE	106.321	56.3754
sgRNA0663	SPV_1783,SPV_1784,SPV_1785	SPV_1783,SPV_1784,SPV_1785	0.743339	0.612698	0.225045	0.768382	FALSE	86.7049	55.3842
sgRNA0664	SPV_1787,SPV_1788	rnmV,tatD	-0.326621	0.49574	0.509989	0.883195	FALSE	106.157	113.322
sgRNA0665	SPV_1790	rpmH	2.15199	0.857028	0.0120392	0.168736	FALSE	100.575	26.7712
sgRNA0666	SPV_1791	SPV_1791	4.17715	1.00809	3.41873e-05	0.0013477	TRUE	107.085	6.23784
sgRNA0667	SPV_1792	SPV_1792	0.0317443	0.529825	0.952224	0.993482	FALSE	146.477	142.797
sgRNA0668	SPV_1793	SPV_1793	0.237367	0.380362	0.532592	0.890427	FALSE	194.628	167.846
sgRNA0669	SPV_1794	SPV_1794	0.788552	0.458987	0.0857915	0.572928	FALSE	206.923	154.969
sgRNA0670	SPV_1796	SPV_1796	0.302433	0.84153	0.719307	0.935178	FALSE	101.214	91.1237
sgRNA0671	SPV_1797	ccpA	0.497771	0.552828	0.367903	0.832705	FALSE	134.379	136.298
sgRNA0672	SPV_1798,SPV_1799,SPV_1800,SPV_1801,SPV_1802,SPV_1803	SPV_1798,SPV_1799,SPV_1800,SPV_1801,SPV_1802,SPV_1803	1.03615	0.41013	0.0115241	0.165991	FALSE	247.32	137.925
sgRNA0673	SPV_2423	rpmG2	3.68589	0.798011	3.85883e-06	0.000257296	TRUE	208.994	18.0996
sgRNA0674	SPV_1821	pbp2a	0.298267	0.4275	0.485364	0.872839	FALSE	104.832	104.643
sgRNA0675	SPV_1822	rluD2	0.617487	0.412092	0.134024	0.638873	FALSE	218.133	192.254
sgRNA0676	SPV_1823	gap	-0.207926	0.689631	0.763031	0.9474	FALSE	21.6953	36.972
sgRNA0677	SPV_1824	SPV_1824	-0.135088	0.326848	0.679384	0.933782	FALSE	224.821	220.823
sgRNA0678	SPV_1827,SPV_2426	SPV_1827,SPV_2426	-0.157632	0.42087	0.708003	0.935178	FALSE	138.861	128.845
sgRNA0679	SPV_1829	bguR	0.35475	0.386029	0.35811	0.832705	FALSE	154.995	111.478
sgRNA0680	SPV_1830,SPV_1831,SPV_1832,SPV_1833	bguA,bguD,bguB,bguC	0.460726	0.498131	0.355012	0.832705	FALSE	188.604	166.406
sgRNA0681	SPV_1834	adhE	1.00127	0.606839	0.0989466	0.596113	FALSE	169.962	102.63
sgRNA0682	SPV_1838	yajC	-0.674534	0.42794	0.114972	0.612909	FALSE	116.801	142.334
sgRNA0683	SPV_1838,SPV_1839	yajC,ulaH	1.0033	0.325081	0.00202655	0.0415859	TRUE	184.254	90.2426
sgRNA0684	SPV_1840,SPV_1841	ulaG,ulaR	0.724119	0.877183	0.409085	0.83893	FALSE	165.736	126.389
sgRNA0685	SPV_1851	rnpA	-0.338415	1.01126	0.737891	0.935588	FALSE	16.2183	29.1206
sgRNA0686	SPV_1853	ackA	0.035106	0.442237	0.936728	0.993344	FALSE	175.927	157.329
sgRNA0687	SPV_1854	SPV_1854	-0.546706	0.334362	0.102035	0.599236	FALSE	141.523	240.398
sgRNA0688	SPV_2427,SPV_1857,SPV_1858,SPV_1859,SPV_1860,SPV_1861,SPV_1862,SPV_1863	SPV_2427,comGG,comGF,comGE,comGD,comGC,comGB,comGA	-0.543993	0.523269	0.298524	0.817735	FALSE	236.078	284.207
sgRNA0689	SPV_1864	SPV_1864	-0.230124	0.30489	0.450383	0.854167	FALSE	190.069	260.543
sgRNA0690	SPV_1865	adh	0.565008	0.676627	0.403698	0.83893	FALSE	109.575	90.0005
sgRNA0691	SPV_1866	nagA	-0.00837917	0.367834	0.981826	0.994736	FALSE	111.408	106.165
sgRNA0692	SPV_1867	adr	-0.444529	0.402636	0.269573	0.804464	FALSE	77.3179	105.291
sgRNA0693	SPV_1869	SPV_1869	0.706591	0.449817	0.11622	0.61303	FALSE	158.547	91.7537
sgRNA0694	SPV_1870	pcp2	0.314477	0.310311	0.310857	0.819042	FALSE	214.437	164.703
sgRNA0695	SPV_1870,SPV_1871,SPV_1872,SPV_2431	pcp2,SPV_1871,SPV_1872,SPV_2431	-0.58719	0.398149	0.140266	0.645937	FALSE	241.178	308.994
sgRNA0696	SPV_1874	SPV_1874	0.0674768	0.345833	0.845304	0.968993	FALSE	190.886	198.957
sgRNA0697	SPV_1877	thrC	0.0678313	0.73409	0.926379	0.991934	FALSE	113.14	146.131
sgRNA0698	SPV_1878	SPV_1878	-0.275826	0.354551	0.436594	0.845021	FALSE	193.008	194.162
sgRNA0699	SPV_1879	tRNA-Leu-6	0.765239	0.57507	0.183291	0.699139	FALSE	102.497	85.8447
sgRNA0700	SPV_1879,SPV_1880,SPV_1881	tRNA-Leu-6,tRNA-Gln-2,tRNA-His-1	0.47402	0.605017	0.433344	0.845021	FALSE	53.5586	38.8141
sgRNA0701	SPV_1896	gltX	1.98704	1.18304	0.0930343	0.587507	FALSE	62.5692	19.8046
sgRNA0702	SPV_1897	pgi	2.29783	0.808134	0.00446386	0.0760143	FALSE	51.2626	8.68806
sgRNA0703	SPV_1898,SPV_1899	SPV_1898,SPV_1899	0.569578	0.339433	0.0933422	0.587507	FALSE	155.893	101.722
sgRNA0704	SPV_1902	patA	1.28208	0.729228	0.078726	0.545716	FALSE	148.192	80.7118
sgRNA0705	SPV_1904	argR1	-0.638317	0.770136	0.407197	0.83893	FALSE	26.0444	47.2545
sgRNA0706	SPV_1905	argS	0.816237	0.891898	0.360103	0.832705	FALSE	95.317	59.3513
sgRNA0707	SPV_1908,SPV_1909	pnpR,pnpS	0.260847	0.490872	0.595145	0.909015	FALSE	183.322	169.307
sgRNA0708	SPV_1918,SPV_1919	gpsA,galU	-0.112702	0.668011	0.866023	0.973342	FALSE	603.608	1279.36
sgRNA0709	SPV_1923	dapD	-0.0861418	0.560614	0.877881	0.9792	FALSE	81.0527	89.6958
sgRNA0710	SPV_2436	srf-25	-1.59631	0.75954	0.0355814	0.343267	FALSE	89.5286	125.762
sgRNA0711	SPV_1924	SPV_1924	0.0129624	0.317234	0.967407	0.994736	FALSE	237.165	240.815
sgRNA0712	SPV_1925	pbp1b	-0.974011	0.620983	0.116764	0.61303	FALSE	158.542	241.828
sgRNA0713	SPV_1926	tyrS	-0.04639	0.545729	0.932257	0.992643	FALSE	74.0316	61.6223
sgRNA0714	SPV_1927,SPV_1928	ctpC,SPV_1928	-0.303159	0.415731	0.465868	0.864783	FALSE	147.187	197.428
sgRNA0715	SPV_1929	rrmA	-0.338058	0.529465	0.523155	0.887569	FALSE	184.493	226.81
sgRNA0716	SPV_1932,SPV_1933	malP,malQ	-0.346156	0.358898	0.334797	0.823524	FALSE	164.301	218.071
sgRNA0717	SPV_1934	malX	-0.42846	0.722432	0.553128	0.896025	FALSE	147.546	159.603
sgRNA0718	SPV_1937,SPV_1938	malA,malR	-0.127162	0.302323	0.674036	0.933209	FALSE	134.348	151.919
sgRNA0719	SPV_1940,SPV_1941	SPV_1940,aspS	-0.628137	1.25743	0.617398	0.917522	FALSE	19.8285	34.5808
sgRNA0720	SPV_1943	SPV_1943	0.351237	0.408184	0.38952	0.837386	FALSE	187.632	130.643
sgRNA0721	SPV_1948	SPV_1948	0.205682	0.286968	0.473532	0.867177	FALSE	168.301	166.25
sgRNA0722	SPV_1950	hisS	-0.0171953	0.750603	0.981723	0.994736	FALSE	50.7825	29.2747
sgRNA0723	SPV_1951	SPV_1951	0.546556	0.621646	0.379289	0.834293	FALSE	196.307	161.844
sgRNA0724	SPV_1952	rgg	-0.0546964	0.411721	0.894313	0.983057	FALSE	135.531	146.631
sgRNA0725	SPV_1954	SPV_1954	0.194956	0.529692	0.712832	0.935178	FALSE	129.278	118.309
sgRNA0726	SPV_1956	ilvD	-0.382218	0.399207	0.338343	0.825468	FALSE	164.186	177.854
sgRNA0727	SPV_1962,SPV_2438	SPV_1962,SPV_2438	0.454813	0.792805	0.566187	0.900946	FALSE	159.017	165.076
sgRNA0728	SPV_1963,SPV_1964	rpmF,rpmG3	1.59832	0.84481	0.0584999	0.464981	FALSE	122.558	43.5852
sgRNA0729	SPV_1965	cbpN	0.837746	0.827112	0.311129	0.819042	FALSE	152.4	111.333
sgRNA0730	SPV_2439,SPV_1969,SPV_1970,SPV_1971,SPV_1972	SPV_2439,SPV_1969,SPV_1970,SPV_1971,SPV_1972	0.565821	0.361213	0.117244	0.61303	FALSE	146.913	101.805
sgRNA0731	SPV_1974,SPV_2441	SPV_1974,SPV_2441	-0.0194736	0.458136	0.966095	0.994736	FALSE	221.467	245.024
sgRNA0732	SPV_2442,SPV_1975	srf-26,arcA	-0.447521	0.457398	0.327873	0.819042	FALSE	127.294	143.553
sgRNA0733	SPV_1984	ybbK	0.480597	0.529763	0.364305	0.832705	FALSE	176.562	143.663
sgRNA0734	SPV_1985,SPV_1986,SPV_1987,SPV_1988,SPV_1989,SPV_1990,SPV_1991,SPV_1992,SPV_1993,SPV_1994,SPV_1995	adh2,fucI,fucL,fucY,SPV_1989,SPV_1990,SPV_1991,SPV_1992,fucU,fucA,fucK	-0.451537	0.46257	0.328991	0.819042	FALSE	135.653	195.883
sgRNA0735	SPV_1996	fucR	0.107011	0.50201	0.831199	0.96672	FALSE	125.96	102.711
sgRNA0736	SPV_2448	SPV_2448	0.115967	0.357351	0.745546	0.939012	FALSE	119.62	128.79
sgRNA0737	SPV_2447,SPV_2449	srf-27,srf-28	1.17914	0.720171	0.101565	0.599236	FALSE	26.7604	15.9147
sgRNA0738	SPV_2450	SPV_2450	0.248658	0.591867	0.674395	0.933209	FALSE	141.933	173.567
sgRNA0739	SPV_2449	srf-28	-0.649126	0.667462	0.330788	0.819042	FALSE	23.5245	23.3867
sgRNA0740	SPV_1997,SPV_1998,SPV_1999,SPV_2000	adcA,adcB,adcC,adcR	0.274198	0.555757	0.621747	0.920826	FALSE	66.5695	70.449
sgRNA0741	SPV_2006	SPV_2006	-0.261726	0.463443	0.572249	0.901197	FALSE	225.621	276.793
sgRNA0742	SPV_2007	SPV_2007	0.228679	0.450294	0.611563	0.916372	FALSE	145.474	156.307
sgRNA0743	SPV_2010,SPV_2011,SPV_2012,SPV_2013	SPV_2010,glpF,glpO,glpK	0.144017	0.429335	0.737292	0.935588	FALSE	174.78	156.26
sgRNA0744	SPV_2010,SPV_2011,SPV_2012,SPV_2013,SPV_2014	SPV_2010,glpF,glpO,glpK,SPV_2014	0.216606	0.45226	0.63198	0.925248	FALSE	112.076	93.887
sgRNA0745	SPV_2015,SPV_2016	hslO,SPV_2016	0.214349	0.323515	0.507612	0.88263	FALSE	175.973	172.169
sgRNA0746	SPV_2017,SPV_2018	cbpA,SPV_2018	0.615879	0.423262	0.145648	0.659244	FALSE	190.584	132.807
sgRNA0747	SPV_2022,SPV_2023	clpC,ctsR	-0.214788	0.424647	0.612995	0.916372	FALSE	150.929	164.918
sgRNA0748	SPV_2024,SPV_2025,SPV_2026,SPV_2027	thiZ,thiY,thiX,SPV_2027	0.501688	0.511995	0.32715	0.819042	FALSE	100.543	72.2137
sgRNA0749	SPV_2028,SPV_2028,SPV_2454	cbpD,cbpD,srf-29	-1.59295	1.32893	0.230655	0.770985	FALSE	51.1795	56.1831
sgRNA0750	SPV_2029	SPV_2029	2.49458	0.969971	0.0101167	0.148577	FALSE	131.717	29.0453
sgRNA0751	SPV_2031,SPV_2032	rplI,pde1	1.22158	1.37101	0.372924	0.834293	FALSE	15.5341	4.72194
sgRNA0752	SPV_2033	hpf	-0.0456231	0.425392	0.914591	0.985653	FALSE	143.768	141.465
sgRNA0753	SPV_2034,SPV_2035	comFC,comFA	-0.429397	0.437931	0.326833	0.819042	FALSE	189.249	210.238
sgRNA0754	SPV_2036	SPV_2036	0.491182	0.333305	0.140571	0.645937	FALSE	193.841	150.766
sgRNA0755	SPV_2037	cysK	0.0882422	0.462596	0.848718	0.968993	FALSE	122.492	138.489
sgRNA0756	SPV_2042,SPV_2458	rpsB,srf-30	0.550207	0.968812	0.57009	0.901197	FALSE	49.452	28.2884
sgRNA0757	SPV_2043	pcsB	5.11753	1.56621	0.00108516	0.0253995	TRUE	24.1051	0
sgRNA0758	SPV_2049,SPV_2050,SPV_2051,SPV_2052	pgsA,rodZ,SPV_2051,SPV_2052	1.05857	1.03532	0.306566	0.819042	FALSE	112.805	57.5906
sgRNA0759	SPV_2053,SPV_2054	SPV_2053,recF	0.802759	0.534792	0.133338	0.638873	FALSE	114.179	105.375
sgRNA0760	SPV_2055	guaB	-0.0388884	0.554381	0.944076	0.993482	FALSE	59.2692	74.5972
sgRNA0761	SPV_2056	trpS	-0.397087	1.10447	0.719201	0.935178	FALSE	23.893	49.1371
sgRNA0762	SPV_2057	SPV_2057	-0.223974	0.334484	0.503107	0.881139	FALSE	239.638	244.626
sgRNA0763	SPV_2060	pipR	-0.529049	0.827451	0.522581	0.887569	FALSE	100.213	118.015
sgRNA0764	SPV_2062,SPV_2063,SPV_2064,SPV_2065	tRNA-Glu-5,comE,comD,comC1	-1.16648	0.445763	0.00887527	0.134294	FALSE	80.5936	179.004
sgRNA0765	SPV_2066	tRNA-Arg-5	1.36081	0.577728	0.0185004	0.230947	FALSE	66.1928	39.9021
sgRNA0766	SPV_2066,SPV_2067	tRNA-Arg-5,rlmH	0.7632	0.858407	0.373956	0.834293	FALSE	193.064	165.544
sgRNA0767	SPV_2068,SPV_2069	htrA,parB	-0.437724	0.354871	0.217399	0.757276	FALSE	121.748	169.639
sgRNA0768	SPV_2069	parB	0.20056	0.344377	0.560307	0.900946	FALSE	183.723	190.731
sgRNA0769	SPV_0005	pth	0.649299	0.369716	0.0790523	0.545716	FALSE	117.41	95.3897
sgRNA0770	SPV_0011	tilS	-0.129343	0.996902	0.896768	0.983057	FALSE	63.2842	48.2652
sgRNA0771	SPV_0013	ftsH	0.619005	0.432529	0.152393	0.674395	FALSE	84.3436	71.8305
sgRNA0772	SPV_0038	polA	1.36345	0.427028	0.00140859	0.0314935	TRUE	94.9133	44.3226
sgRNA0773	SPV_0111	argH	-0.410223	0.450522	0.362533	0.832705	FALSE	207.501	241.582
sgRNA0774	SPV_0130	rnjA	1.85974	0.849843	0.0286452	0.302834	FALSE	247.811	146.092
sgRNA0775	SPV_0136	tsaD	-0.308033	0.534149	0.564156	0.900946	FALSE	50.8625	87.759
sgRNA0776	SPV_0214	adk	2.3006	1.10783	0.0378316	0.354198	FALSE	21.4851	4.70657
sgRNA0777	SPV_0270	sulB	0.184397	0.581499	0.751164	0.942182	FALSE	53.7468	60.1092
sgRNA0778	SPV_0271	sulC	2.01399	0.625746	0.00128846	0.0296941	TRUE	122.398	38.2473
sgRNA0779	SPV_0272	sulD	0.934209	0.699319	0.181587	0.699139	FALSE	51.9874	36.5038
sgRNA0780	SPV_0305	ftsL	6.55546	1.38574	2.23812e-06	0.000167635	TRUE	20.1327	0
sgRNA0781	SPV_0331	cps2O	0.22927	0.503306	0.648729	0.927301	FALSE	153.898	184.027
sgRNA0782	SPV_0403	SPV_0403	-0.849713	0.848368	0.316544	0.819042	FALSE	83.4449	150.684
sgRNA0783	SPV_0494	valS	-1.16345	0.517668	0.0246095	0.279281	FALSE	28.1137	54.7876
sgRNA0784	SPV_0506	pheT	1.20755	0.870402	0.165336	0.69083	FALSE	42.2614	30.2817
sgRNA0785	SPV_0600	divIB	4.32375	0.59936	5.43577e-13	1.35713e-10	TRUE	430.866	16.2794
sgRNA0786	SPV_0678	rimM	-0.279643	0.526989	0.595666	0.909015	FALSE	154.336	167.16
sgRNA0787	SPV_0679	trmD	-1.90006	0.776125	0.0143595	0.188689	FALSE	41.641	83.4988
sgRNA0788	SPV_0706	rodA	1.61567	0.393878	4.09653e-05	0.00157349	TRUE	254.436	86.6173
sgRNA0789	SPV_0709	gyrB	0.128907	0.384566	0.737474	0.935588	FALSE	178.447	145.131
sgRNA0790	SPV_0748	parC	1.24752	0.497551	0.0121652	0.168736	FALSE	101.571	87.6562
sgRNA0791	SPV_0760	dnaX	-0.258942	0.718749	0.718647	0.935178	FALSE	22.5853	47.2703
sgRNA0792	SPV_0768	cozE	2.5474	0.73122	0.000494402	0.0139738	TRUE	292.798	58.7294
sgRNA0793	SPV_0820	rluD1	0.354249	0.586909	0.54612	0.893397	FALSE	141.854	95.0674
sgRNA0794	SPV_0827	yabA	1.81292	0.898654	0.0436567	0.385773	FALSE	79.9383	27.0309
sgRNA0795	SPV_0835	frr	0.941039	0.578685	0.103914	0.601014	FALSE	110.853	71.7752
sgRNA0796	SPV_0847	infC	6.2893	1.26259	6.31657e-07	4.98012e-05	TRUE	73.244	0.943549
sgRNA0797	SPV_0848	rpmI	4.79189	1.45614	0.000998991	0.0245326	TRUE	32.7598	0.629964
sgRNA0798	SPV_0859	coaE	1.48982	0.436756	0.000647007	0.0170038	TRUE	288.879	79.9073
sgRNA0799	SPV_0877	mtnN	-0.275095	0.303349	0.364481	0.832705	FALSE	236.268	256.299
sgRNA0800	SPV_0879	dnaQ	0.166176	0.498024	0.738628	0.935588	FALSE	89.6077	185.953
sgRNA0801	SPV_0880	SPV_0880	0.233839	0.639195	0.71449	0.935178	FALSE	71.4852	73.8547
sgRNA0802	SPV_0906	prfA	-0.231474	0.60477	0.701907	0.935178	FALSE	108.938	97.4653
sgRNA0803	SPV_0908	tsaC	0.5806	0.710018	0.413514	0.83893	FALSE	137.379	90.4903
sgRNA0804	SPV_0964	obgE	-0.592423	0.359621	0.0994848	0.596113	FALSE	76.062	86.755
sgRNA0805	SPV_0965	SPV_0965	-0.127315	0.445706	0.775148	0.953021	FALSE	50.8264	58.9406
sgRNA0806	SPV_0970	map	0.211639	0.602858	0.725543	0.935178	FALSE	144.94	154.972
sgRNA0807	SPV_0979	nifS	0.591134	0.694154	0.394442	0.838119	FALSE	38.9283	37.9252
sgRNA0808	SPV_0989	rplU	0.939027	0.609387	0.123332	0.62416	FALSE	47.9226	51.4851
sgRNA0809	SPV_0990	SPV_0990	1.65538	0.768635	0.0312661	0.316464	FALSE	54.0187	25.8585
sgRNA0810	SPV_0991	rpmA	2.55088	0.569222	7.41748e-06	0.000411533	TRUE	71.1459	27.3182
sgRNA0811	SPV_1101	ftsY	0.0651707	0.489413	0.894066	0.983057	FALSE	159.759	166.428
sgRNA0812	SPV_1104	smc	0.0590114	3.04098	0.984518	0.995147	FALSE	0.427888	0
sgRNA0813	SPV_1129	licD1	4.91642	0.761504	1.0737e-10	2.0105e-08	TRUE	549.239	48.7939
sgRNA0814	SPV_1142	ffh	-0.603968	0.396685	0.127874	0.628094	FALSE	70.3862	101.532
sgRNA0815	SPV_1187	rplL	0.0495624	0.420636	0.906205	0.983057	FALSE	82.3138	100.4
sgRNA0816	SPV_1188	rplJ	0.810719	1.23779	0.512487	0.883327	FALSE	23.4854	17.1535
sgRNA0817	SPV_1349	murC	0.486752	2.03246	0.810726	0.960053	FALSE	4.55142	1.88989
sgRNA0818	SPV_1373	aspC	-0.474386	0.590912	0.422088	0.841145	FALSE	39.7454	58.5418
sgRNA0819	SPV_1398	engB	0.311827	0.401214	0.437035	0.845021	FALSE	148.874	118.51
sgRNA0820	SPV_1399	clpX	1.66436	1.21395	0.170367	0.699139	FALSE	35.3891	16.8439
sgRNA0821	SPV_1428	cmk	0.0613495	0.498978	0.902146	0.983057	FALSE	38.3726	37.4434
sgRNA0822	SPV_1472	ileS	1.18919	0.916758	0.194573	0.716142	FALSE	34.5371	30.0913
sgRNA0823	SPV_2374,SPV_1474	SPV_2374,divIVA	1.2002	0.365499	0.00102447	0.0247526	TRUE	221.365	105.792
sgRNA0824	SPV_1483	murF	5.05428	1.20229	2.62381e-05	0.00112299	TRUE	118.358	11.3394
sgRNA0825	SPV_1485	recR	-0.576334	0.502566	0.251472	0.795642	FALSE	63.9569	62.6
sgRNA0826	SPV_1508	alr	1.46912	0.988187	0.1371	0.643055	FALSE	200.316	61.0839
sgRNA0827	SPV_1509	acpS	2.21595	0.576598	0.000121466	0.00395556	TRUE	158.07	50.0484
sgRNA0828	SPV_1519	engA	0.262441	0.646634	0.684848	0.934749	FALSE	98.5519	94.1939
sgRNA0829	SPV_1521	dnaI	1.28808	0.94537	0.173037	0.699139	FALSE	23.7927	14.478
sgRNA0830	SPV_1545	fmt	0.266534	0.462412	0.564346	0.900946	FALSE	81.9381	87.437
sgRNA0831	SPV_1546	priA	0.516406	0.52119	0.321773	0.819042	FALSE	82.0918	62.7468
sgRNA0832	SPV_1655	scpB	1.18028	0.885473	0.182554	0.699139	FALSE	138.441	71.2022
sgRNA0833	SPV_1656	scpA	0.696354	0.511885	0.173712	0.699139	FALSE	155.799	74.8254
sgRNA0834	SPV_1758	rpoC	0.463455	1.31821	0.725154	0.935178	FALSE	9.84056	14.523
sgRNA0835	SPV_1759	rpoB	2.48414	1.379	0.0716386	0.518428	FALSE	47.9245	28.6745
sgRNA0836	SPV_1764	murA-2	-0.0565723	0.436338	0.896841	0.983057	FALSE	132.728	147.969
sgRNA0837	SPV_1819	nusG	-0.192745	0.456186	0.67265	0.933209	FALSE	129.346	141.505
sgRNA0838	SPV_1820	secE	2.9726	0.759649	9.11116e-05	0.00310194	TRUE	172.104	23.7764
sgRNA0839	SPV_1849	eloR	-0.499363	0.384879	0.194475	0.716142	FALSE	109.291	155.75
sgRNA0840	SPV_2030	dnaC	0.789751	1.03809	0.446794	0.851472	FALSE	46.2452	35.5538
sgRNA0841	SPV_2041	tsf	2.59239	0.928644	0.00524507	0.0873013	FALSE	37.4734	9.05996
sgRNA0842	SPV_2044	mreD	1.69673	0.379999	8.00332e-06	0.000428177	TRUE	355.346	114.236
sgRNA0843	SPV_2045	mreC	1.55882	0.89685	0.0821921	0.562209	FALSE	183.244	56.7972
sgRNA0844	SPV_0621,SPV_0619	lctO,SPV_0619	0.696045	0.447416	0.119779	0.616596	FALSE	154.14	110.433
sgRNA0845	NA	NA	-0.232542	0.411136	0.571659	0.901197	FALSE	134.575	182.659
sgRNA0846	SPV_2297,SPV_1038	phtB,phtA	-0.743055	0.819048	0.364292	0.832705	FALSE	166.071	216.117
sgRNA0847	SPV_1038	phtA	-0.108557	0.282357	0.700632	0.935178	FALSE	146.509	177.134
sgRNA0848	SPV_2214,SPV_0639,SPV_2318,SPV_1316,SPV_2348,SPV_2221,SPV_0711	SPV_2214,SPV_0639,SPV_2318,SPV_1316,SPV_2348,SPV_2221,SPV_0711	-0.3481	0.513879	0.498154	0.878957	FALSE	93.1616	108.479
sgRNA0849	SPV_2163,SPV_2407	SPV_2163,SPV_2407	-0.246242	0.535867	0.64586	0.927301	FALSE	214.926	213.269
sgRNA0850	SPV_1058,SPV_0559,SPV_0560,SPV_0561,SPV_0562	SPV_1058,SPV_0559,SPV_0560,SPV_0561,bgaA	-0.272662	0.317622	0.390645	0.837386	FALSE	344.223	386.667
sgRNA0851	SPV_0085,SPV_2094,SPV_1317	SPV_0085,SPV_2094,SPV_1317	-0.110893	0.602862	0.854057	0.968993	FALSE	110.376	113.993
sgRNA0852	SPV_1682,SPV_1683,SPV_1887	tRNA-Ser-2,tRNA-Ile-1,tRNA-Ile-2	1.00068	1.17122	0.39289	0.837662	FALSE	8.67891	10.2236
sgRNA0853	SPV_1883,SPV_0755	tRNA-Tyr-2,tRNA-Tyr-1	1.20839	1.06977	0.258655	0.801998	FALSE	9.37141	5.46533
sgRNA0854	SPV_0794,SPV_2241,SPV_2251,SPV_0832,SPV_2274,SPV_0971,SPV_1966	SPV_0794,SPV_2241,SPV_2251,SPV_0832,SPV_2274,SPV_0971,SPV_1966	-0.395816	0.583951	0.497884	0.878957	FALSE	129.839	213.396
sgRNA0855	SPV_2274,SPV_0972,SPV_2304,SPV_2305,SPV_1170,SPV_1171,SPV_1172,SPV_1173,SPV_2322,SPV_1539,SPV_2386,SPV_1906,SPV_1967,SPV_2414,SPV_2415,SPV_2083,SPV_0045	SPV_2274,SPV_0972,SPV_2304,SPV_2305,appA,SPV_1171,nanE-2,SPV_1173,SPV_2322,SPV_1539,SPV_2386,SPV_1906,SPV_1967,SPV_2414,SPV_2415,SPV_2083,SPV_0045	0.000641283	0.303443	0.998314	0.998314	FALSE	260.275	243.094
sgRNA0856	SPV_0041,SPV_0042,SPV_0043,SPV_0044,SPV_0045	araT,recO,plsX,SPV_0044,SPV_0045	-0.0245504	0.654011	0.970056	0.994736	FALSE	111.996	111.965
sgRNA0857	SPV_2432	SPV_2432	0.0240114	0.310227	0.938306	0.993344	FALSE	180.863	224.69
sgRNA0858	SPV_2326	SPV_2326	-0.323949	0.59055	0.583311	0.905493	FALSE	82.5887	117.939
sgRNA0859	SPV_1682	tRNA-Ser-2	2.88641	1.04359	0.00567751	0.0934606	FALSE	74.6673	20.9358
sgRNA0860	SPV_1700,SPV_1814,SPV_1891,SPV_0018	rrlB,rrlC,rrlD,rrlA	1.2149	0.75083	0.105646	0.60174	FALSE	162.618	80.7687
sgRNA0861	SPV_1703,SPV_1817,SPV_1894,SPV_2062,SPV_0015	tRNA-Glu-2,tRNA-Glu-3,tRNA-Glu-4,tRNA-Glu-5,tRNA-Glu-1	1.60332	0.884587	0.0699076	0.510837	FALSE	32.3393	15.4251
sgRNA0862	SPV_1699,SPV_1813,SPV_1890,SPV_0019	rrfB,rrfC,rrfD,rrfA	3.48567	1.4006	0.0128211	0.173028	FALSE	22.7064	1.25993
sgRNA0863	SPV_1818,SPV_0014	comX2,comX1	-0.0791447	0.362656	0.827245	0.963779	FALSE	184.391	212.207
sgRNA0864	SPV_1682,SPV_1683,SPV_1684,SPV_1685,SPV_1686,SPV_1687,SPV_1688,SPV_1689,SPV_1690,SPV_1691,SPV_1692,SPV_1693,SPV_1694,SPV_1695,SPV_1804,SPV_1805,SPV_1806,SPV_1807,SPV_1808,SPV_1809	tRNA-Ser-2,tRNA-Ile-1,tRNA-Gly-1,tRNA-Phe-1,tRNA-fMet-1,tRNA-Ser-3,tRNA-Ile2-1,tRNA-Met-1,tRNA-Pro-1,tRNA-Arg-3,tRNA-Leu-2,tRNA-Gly-2,tRNA-Thr-2,tRNA-Leu-3,tRNA-Pro-2,tRNA-Arg-4,tRNA-Leu-4,tRNA-Gly-3,tRNA-Thr-3,tRNA-Leu-5	1.25906	0.965324	0.192137	0.714195	FALSE	53.1854	26.4539
sgRNA0865	SPV_0358,SPV_2155,SPV_2156,SPV_2341,SPV_2343,SPV_1315,SPV_2346,SPV_0743,SPV_2230,SPV_0744	SPV_0358,SPV_2155,SPV_2156,SPV_2341,SPV_2343,SPV_1315,SPV_2346,SPV_0743,SPV_2230,SPV_0744	1.11856	0.533101	0.0358866	0.343267	FALSE	110.967	66.074
sgRNA0866	SPV_1702,SPV_1816,SPV_1893,SPV_0016	rrsB,rrsC,rrsD,rrsA	-0.771342	1.26766	0.542872	0.893397	FALSE	18.472	37.1721
sgRNA0868	SPV_1623,SPV_2086,SPV_0049,SPV_0050	SPV_1623,srf-03,comA,comB	0.745474	0.524244	0.155027	0.677056	FALSE	94.0154	61.8665
sgRNA0869	SPV_2143,SPV_0314,SPV_1825,SPV_2425,SPV_2268,SPV_1014,SPV_2263,SPV_2264,SPV_2223,SPV_0716,SPV_2093,SPV_2070,SPV_2071	SPV_2143,SPV_0314,SPV_1825,SPV_2425,SPV_2268,SPV_1014,SPV_2263,SPV_2264,SPV_2223,SPV_0716,SPV_2093,SPV_2070,SPV_2071	-0.526319	0.83774	0.529834	0.890427	FALSE	55.3556	83.2087
sgRNA0870	SPV_0003	SPV_0003	-0.00315975	0.519474	0.995147	0.997664	FALSE	92.122	79.5367
sgRNA0871	SPV_0006	mfd	-1.20409	0.889628	0.175904	0.699139	FALSE	107.982	144.502
sgRNA0872	SPV_0010	SPV_0010	2.89002	0.511472	1.60087e-08	1.99841e-06	TRUE	322.108	57.0622
sgRNA0873	SPV_1701,SPV_1815,SPV_1892,SPV_0017	tRNA-Ala-2,tRNA-Ala-3,tRNA-Ala-4,tRNA-Ala-1	0.210134	0.438874	0.632079	0.925248	FALSE	173.959	156.881
sgRNA0874	SPV_0034,SPV_2080	SPV_0034,SPV_2080	2.17855	0.915599	0.0173424	0.222042	FALSE	80.606	26.7699
sgRNA0875	SPV_0047	SPV_0047	-0.0221376	0.533145	0.966879	0.994736	FALSE	133.741	182.251
sgRNA0876	SPV_0063	strH	0.598241	0.490612	0.222701	0.766911	FALSE	169.106	127.426
sgRNA0877	SPV_0077	cabP	-0.259926	0.466891	0.577721	0.902425	FALSE	249.048	220.693
sgRNA0878	SPV_0086	SPV_0086	-0.400812	0.456779	0.380229	0.834293	FALSE	129.96	165.826
sgRNA0879	SPV_0086,SPV_0087	SPV_0086,SPV_0087	0.149657	0.423833	0.724011	0.935178	FALSE	134.973	147.761
sgRNA0880	SPV_0088	SPV_0088	0.19842	0.552702	0.719594	0.935178	FALSE	118.418	94.4189
sgRNA0881	SPV_0089	SPV_0089	-0.457073	0.651072	0.48266	0.870029	FALSE	117.612	143.039
sgRNA0882	SPV_0090	SPV_0090	-0.233089	0.530809	0.660574	0.929786	FALSE	117.424	113.7
sgRNA0883	SPV_0106	SPV_0106	-0.838016	0.669245	0.210504	0.752589	FALSE	109.786	124.896
sgRNA0884	SPV_0109	SPV_0109	1.17652	1.03001	0.253352	0.795642	FALSE	43.0915	19.0025
sgRNA0885	SPV_0110	argG	-0.172	0.374792	0.646292	0.927301	FALSE	103.9	114.138
sgRNA0886	SPV_0113,SPV_2097	SPV_0113,SPV_2097	-1.08546	0.779037	0.163519	0.690006	FALSE	151.614	176.1
sgRNA0887	SPV_0114	SPV_0114	-0.469442	0.379014	0.215499	0.754254	FALSE	171.983	239.408
sgRNA0888	SPV_0115	SPV_0115	-0.735526	0.398653	0.0650333	0.484676	FALSE	177.376	261.765
sgRNA0889	SPV_0116	SPV_0116	0.196085	0.288717	0.497037	0.878957	FALSE	216.365	208.359
sgRNA0890	SPV_0117	SPV_0117	0.140415	0.42597	0.741675	0.936961	FALSE	116.076	126.519
sgRNA0891	SPV_0118	SPV_0118	0.145698	1.0185	0.886249	0.981227	FALSE	55.2906	50.1847
sgRNA0892	SPV_0135	rimI	-1.72583	0.979366	0.078037	0.543718	FALSE	25.3688	113.904
sgRNA0893	SPV_0138	epsF	1.05344	1.19999	0.380012	0.834293	FALSE	106.722	72.8887
sgRNA0894	SPV_0139	SPV_0139	-1.46478	0.776633	0.0592866	0.464981	FALSE	89.7266	189.575
sgRNA0895	SPV_0140	SPV_0140	-0.377549	0.896119	0.673525	0.933209	FALSE	92.4389	102.947
sgRNA0896	SPV_0141	SPV_0141	0.316192	0.358955	0.378389	0.834293	FALSE	148.573	128.635
sgRNA0897	SPV_0142	SPV_0142	-2.04616	0.927513	0.0273792	0.292957	FALSE	80.1002	107.937
sgRNA0898	SPV_0143	ugd	0.619733	0.770566	0.421249	0.841145	FALSE	130.648	147.436
sgRNA0899	SPV_0149	azlC	1.37123	0.456031	0.0026394	0.052024	FALSE	239.686	103.81
sgRNA0900	SPV_0152	dapE	-0.357028	0.928017	0.700444	0.935178	FALSE	43.4462	50.0486
sgRNA0901	SPV_0172	SPV_0172	1.16361	0.691893	0.0926132	0.587507	FALSE	64.1211	45.6446
sgRNA0902	SPV_0179	SPV_0179	2.33348	1.06809	0.0289087	0.302834	FALSE	82.2617	30.2661
sgRNA0903	SPV_0183	folC	-0.043697	0.397409	0.912445	0.984683	FALSE	144.553	176.788
sgRNA0904	SPV_0225	SPV_0225	0.696212	0.897369	0.437845	0.845021	FALSE	67.6423	51.8568
sgRNA0905	SPV_0230	deoR	0.29305	0.455588	0.520072	0.887569	FALSE	155.194	121.774
sgRNA0906	SPV_0231	SPV_0231	-0.326233	0.500717	0.514704	0.88522	FALSE	90.194	117.198
sgRNA0907	SPV_0232	SPV_0232	0.424865	0.537969	0.429669	0.843576	FALSE	103.624	104.818
sgRNA0908	SPV_0233	SPV_0233	0.331268	0.298983	0.26787	0.804464	FALSE	163.988	124.811
sgRNA0909	SPV_0234	SPV_0234	-0.52575	0.460837	0.253929	0.795785	FALSE	71.1312	80.9031
sgRNA0910	SPV_0235	SPV_0235	-1.35166	0.447602	0.00252965	0.0505256	FALSE	80.296	138.056
sgRNA0911	SPV_0236	talC	0.619504	0.784428	0.429672	0.843576	FALSE	166.267	158.778
sgRNA0912	SPV_0237	gldA	-0.0357728	0.414546	0.931233	0.992643	FALSE	82.4861	117.543
sgRNA0913	SPV_0240	SPV_0240	0.0616223	0.560599	0.912471	0.984683	FALSE	104.628	114.298
sgRNA0914	SPV_0242	SPV_0242	1.02283	1.22552	0.403939	0.83893	FALSE	35.1953	15.3404
sgRNA0915	SPV_0256	relE1	0.162928	0.42265	0.699874	0.935178	FALSE	109.894	125.637
sgRNA0916	SPV_0257	SPV_0257	-0.37352	0.67035	0.57739	0.902425	FALSE	96.7428	91.4145
sgRNA0917	SPV_0258	pepS	-0.531184	0.513342	0.300782	0.817735	FALSE	97.5667	130.46
sgRNA0918	SPV_0259	SPV_0259	0.200758	0.371938	0.589361	0.906277	FALSE	119.461	129.14
sgRNA0919	SPV_0268	SPV_0268	1.2031	0.902271	0.182397	0.699139	FALSE	41.1041	37.7484
sgRNA0920	SPV_0276	SPV_0276	0.239499	0.486236	0.622326	0.920826	FALSE	80.339	80.9031
sgRNA0921	SPV_0285	SPV_0285	0.136315	0.406064	0.737098	0.935588	FALSE	117.801	116.062
sgRNA0922	SPV_0287	spnHL	0.417686	0.559487	0.455335	0.855515	FALSE	184.302	157.397
sgRNA0923	SPV_0293	SPV_0293	-0.182295	0.948877	0.847651	0.968993	FALSE	78.6925	82.5067
sgRNA0924	SPV_0294	ugl	-0.00114794	0.355796	0.997426	0.998092	FALSE	164.724	151.761
sgRNA0925	SPV_0295	SPV_0295	-0.140085	0.559797	0.8024	0.958325	FALSE	97.4809	91.1267
sgRNA0926	SPV_0296	SPV_0296	0.0544729	0.459238	0.90558	0.983057	FALSE	85.113	79.1608
sgRNA0927	SPV_0297	SPV_0297	0.230444	0.449946	0.608539	0.915855	FALSE	149.462	118.516
sgRNA0928	SPV_0298	yajC-1	-0.11575	0.445989	0.795222	0.958168	FALSE	112.995	140.219
sgRNA0929	SPV_0302	SPV_0302	0.110646	0.309856	0.721025	0.935178	FALSE	106.347	110.388
sgRNA0930	SPV_0335	eng	0.0977456	0.383955	0.799051	0.958168	FALSE	201.844	166.218
sgRNA0931	SPV_0341	rlmL	2.93447	0.680717	1.62623e-05	0.000716499	TRUE	248.794	58.4861
sgRNA0932	SPV_0342	mapZ	2.79392	0.537332	1.99695e-07	1.75966e-05	TRUE	236.723	38.7277
sgRNA0933	SPV_0345	cbpF	0.274167	0.354174	0.43887	0.845021	FALSE	172.552	145.507
sgRNA0934	SPV_0360	mtlA	-1.21137	1.05956	0.252926	0.795642	FALSE	87.0317	80.6482
sgRNA0935	SPV_0361	mtlR	0.425072	0.430033	0.322925	0.819042	FALSE	161.804	138.523
sgRNA0936	SPV_0362	mtlA2	-0.305835	0.699213	0.661822	0.929786	FALSE	139.823	162.472
sgRNA0937	SPV_0363	mtlD	0.541293	0.516481	0.29462	0.817735	FALSE	80.7923	95.3344
sgRNA0938	SPV_0364	SPV_0364	0.347844	0.717824	0.627974	0.923164	FALSE	77.6562	94.2777
sgRNA0939	SPV_0366	yrrC	-0.373976	0.775285	0.629542	0.923657	FALSE	75.4849	66.0942
sgRNA0940	SPV_0371	mutS2	0.254987	0.498422	0.608939	0.915855	FALSE	111.141	132.997
sgRNA0941	SPV_0400	SPV_0400	-1.75069	1.05719	0.0977265	0.596113	FALSE	62.9328	92.0507
sgRNA0942	SPV_0413	SPV_0413	0.484214	0.58848	0.41061	0.83893	FALSE	137.155	134.031
sgRNA0943	SPV_0418	SPV_0418	2.64604	0.76745	0.000565099	0.0153912	TRUE	308.992	53.8872
sgRNA0944	SPV_0419	dinP	0.203641	0.906713	0.822296	0.963779	FALSE	72.644	106.089
sgRNA0945	SPV_0422	SPV_0422	2.05931	1.07234	0.0548085	0.453809	FALSE	103.141	70.123
sgRNA0946	SPV_0424	SPV_0424	0.0131388	1.1469	0.99086	0.997084	FALSE	118.797	154.59
sgRNA0947	SPV_0425	SPV_0425	-0.628191	0.517649	0.224921	0.768382	FALSE	50.8769	78.5681
sgRNA0948	SPV_0426	lacF-1	0.214554	1.21628	0.859979	0.970066	FALSE	55.792	79.3084
sgRNA0949	SPV_0427	lacG-1	1.00043	1.17285	0.393668	0.837662	FALSE	40.9565	43.8671
sgRNA0950	SPV_0428	lacE-1	0.122734	0.296773	0.679194	0.933782	FALSE	186.488	194.444
sgRNA0951	SPV_0432	mtsA	-0.436663	0.364628	0.23109	0.770985	FALSE	159.89	157.977
sgRNA0952	SPV_0433	SPV_0433	1.02483	0.687962	0.136314	0.643055	FALSE	193.17	152.182
sgRNA0953	SPV_0435	mtsC	1.2718	0.64687	0.0492895	0.419521	FALSE	116.534	52.1543
sgRNA0954	SPV_0436	cspR	-0.48932	0.31201	0.116815	0.61303	FALSE	144.708	161.253
sgRNA0955	SPV_0438	SPV_0438	-0.0961607	0.490924	0.844707	0.968993	FALSE	77.7179	71.5239
sgRNA0956	SPV_0439	SPV_0439	0.0967712	0.398097	0.80794	0.960053	FALSE	75.2376	89.2823
sgRNA0957	SPV_0440	SPV_0440	0.440783	0.54936	0.422346	0.841145	FALSE	48.1397	43.7032
sgRNA0958	SPV_0449	SPV_0449	-0.00980399	0.451677	0.982683	0.994736	FALSE	107.54	97.2759
sgRNA0959	SPV_0453	SPV_0453	-0.0310102	0.533819	0.953676	0.993482	FALSE	122.398	142.73
sgRNA0960	SPV_0456	SPV_0456	0.492186	0.417252	0.238163	0.780675	FALSE	146.614	133.313
sgRNA0961	SPV_0457	SPV_0457	0.735551	0.794384	0.354478	0.832705	FALSE	142.927	108.951
sgRNA0962	SPV_0484	SPV_0484	-0.412053	0.865674	0.634081	0.925959	FALSE	67.8333	76.379
sgRNA0963	SPV_0485	SPV_0485	-0.914373	0.670836	0.172871	0.699139	FALSE	54.9055	140.641
sgRNA0964	SPV_0486	SPV_0486	0.757327	0.748417	0.311583	0.819042	FALSE	85.8291	55.7381
sgRNA0965	SPV_0489	SPV_0489	-0.602696	0.912787	0.509074	0.88263	FALSE	60.1249	94.8894
sgRNA0966	SPV_0493	SPV_0493	0.324226	1.29696	0.802596	0.958325	FALSE	28.54	16.8355
sgRNA0967	SPV_0501	bglG	0.70217	0.375575	0.0615413	0.470351	FALSE	216.082	149.125
sgRNA0968	SPV_0502	bglF	1.06746	0.452666	0.0183661	0.230947	FALSE	151.743	110.101
sgRNA0969	SPV_0503	bglA-2	-0.238425	0.373768	0.523543	0.887569	FALSE	152.867	179.301
sgRNA0970	SPV_0508,SPV_2186	SPV_0508,SPV_2186	-0.404135	0.55031	0.462719	0.864281	FALSE	58.8827	59.4362
sgRNA0971	SPV_0509	higA	0.600398	0.337958	0.0756424	0.535168	FALSE	157.303	114.162
sgRNA0972	SPV_0534	estA	0.189199	0.521131	0.716564	0.935178	FALSE	173.539	218.337
sgRNA0973	SPV_0543	SPV_0543	0.050346	0.436834	0.908245	0.983057	FALSE	212.639	212.939
sgRNA0974	SPV_0552	SPV_0552	-0.894762	0.397784	0.0244892	0.279281	FALSE	139.707	189.16
sgRNA0975	SPV_0553	SPV_0553	0.186935	0.867573	0.829402	0.96538	FALSE	69.0872	57.7764
sgRNA0976	SPV_0555	SPV_0555	-0.995761	0.527356	0.0589973	0.464981	FALSE	57.858	101.73
sgRNA0977	SPV_0556	SPV_0556	-0.700847	0.600756	0.243368	0.789103	FALSE	111.282	163.99
sgRNA0978	SPV_0557,SPV_2194	SPV_0557,SPV_2194	-0.567793	0.608751	0.350965	0.832705	FALSE	199.359	171.329
sgRNA0979	SPV_0563,SPV_2199	SPV_0563,SPV_2199	0.0562317	0.575412	0.922151	0.989569	FALSE	138.12	125.013
sgRNA0980	SPV_2201,SPV_0566,SPV_0567	SPV_2201,SPV_0566,ytqB	-0.367257	0.603621	0.542907	0.893397	FALSE	182.577	189.027
sgRNA0981	SPV_0568	SPV_0568	-0.344233	0.334236	0.303053	0.819042	FALSE	164.54	210.208
sgRNA0982	SPV_0569	nha2	0.430591	0.501508	0.390566	0.837386	FALSE	111.54	86.6981
sgRNA0983	SPV_0570	yihY	-0.0500603	0.318487	0.875102	0.978498	FALSE	107.079	127.998
sgRNA0984	SPV_0577	zmpB	-0.805059	0.468317	0.0856057	0.572928	FALSE	130.312	186.01
sgRNA0985	SPV_0591	SPV_0591	0.414547	0.366821	0.258432	0.801998	FALSE	180.976	149.014
sgRNA0986	SPV_0601	SPV_0601	1.24225	0.837745	0.138114	0.643055	FALSE	167.232	100.747
sgRNA0987	SPV_0602	SPV_0602	1.8836	0.823475	0.0221736	0.259501	FALSE	108.045	46.2332
sgRNA0988	SPV_0605	SPV_0605	-0.558959	0.362308	0.122886	0.624011	FALSE	88.0142	125.113
sgRNA0989	SPV_0606	SPV_0606	0.229914	0.467272	0.622695	0.920826	FALSE	70.3756	83.4035
sgRNA0990	SPV_0607	SPV_0607	-0.272287	0.940314	0.772145	0.951994	FALSE	91.7301	107.765
sgRNA0991	SPV_0611	SPV_0611	0.765169	0.612016	0.21121	0.753317	FALSE	50.2503	39.0883
sgRNA0992	SPV_0612	SPV_0612	-1.12145	0.715119	0.116835	0.61303	FALSE	61.137	86.3848
sgRNA0993	SPV_0613	SPV_0613	0.584536	0.847481	0.490362	0.876586	FALSE	70.2239	62.4785
sgRNA0994	SPV_0614	SPV_0614	0.0146342	0.466488	0.974974	0.994736	FALSE	179.316	156.84
sgRNA0995	SPV_0623	thiM-1	-0.553353	0.366532	0.13112	0.633607	FALSE	82.9526	119.752
sgRNA0996	SPV_0624	thiE-1	2.02209	1.15374	0.079663	0.547409	FALSE	51.8093	28.8839
sgRNA0997	SPV_0632	thiD	-0.298551	0.477022	0.531404	0.890427	FALSE	91.2507	99.6472
sgRNA0998	SPV_0637	SPV_0637	0.194348	0.540601	0.719218	0.935178	FALSE	116.348	111.771
sgRNA0999	SPV_0640,SPV_2215	SPV_0640,SPV_2215	0.314405	0.439841	0.474724	0.868298	FALSE	201.188	209.063
sgRNA1000	SPV_0642	SPV_0642	-0.543692	0.606046	0.369659	0.832705	FALSE	101.025	119.196
sgRNA1001	SPV_0643	SPV_0643	-0.715036	0.775011	0.356208	0.832705	FALSE	80.3522	91.4873
sgRNA1002	SPV_0653	livH	-0.37604	0.443093	0.396065	0.83893	FALSE	126.23	126.519
sgRNA1003	SPV_0654	livM	1.1991	0.419832	0.00428825	0.0746954	FALSE	191.321	81.6333
sgRNA1004	SPV_0655	livG	-0.445683	0.785376	0.57039	0.901197	FALSE	140.218	101.521
sgRNA1005	SPV_0656	livF	-1.08752	0.499436	0.0294434	0.306293	FALSE	158.664	228.803
sgRNA1006	SPV_0662	SPV_0662	1.01838	0.784638	0.194322	0.716142	FALSE	171.201	134.119
sgRNA1007	SPV_0669	rlmN	-0.789276	0.996716	0.428433	0.843416	FALSE	127.559	154.224
sgRNA1008	SPV_0670	SPV_0670	-0.50625	0.534139	0.343238	0.82664	FALSE	147.547	160.735
sgRNA1009	SPV_0671	SPV_0671	-0.0701906	0.434643	0.871707	0.975947	FALSE	170.576	157.251
sgRNA1010	SPV_0680	SPV_0680	-0.598385	0.425894	0.160018	0.682627	FALSE	148.448	186.485
sgRNA1011	SPV_0682	SPV_0682	-0.617142	0.593758	0.298627	0.817735	FALSE	112.874	136.922
sgRNA1012	SPV_0683	SPV_0683	1.28108	0.636172	0.0440368	0.385773	FALSE	118.303	65.3195
sgRNA1013	SPV_0690	SPV_0690	-0.0927165	0.316855	0.769817	0.950689	FALSE	197.874	214.02
sgRNA1014	SPV_0692	SPV_0692	0.420188	0.55943	0.452593	0.854961	FALSE	116.667	114.972
sgRNA1015	SPV_0696	SPV_0696	-0.332065	0.583785	0.569483	0.901197	FALSE	145.595	196.701
sgRNA1016	SPV_0697	SPV_0697	-0.0843208	0.543071	0.876611	0.978512	FALSE	153.812	149.898
sgRNA1017	SPV_0698,SPV_0699	SPV_0698,SPV_0699	-0.40365	0.999769	0.686402	0.934749	FALSE	27.2926	22.6403
sgRNA1018	SPV_0707	thiJ	-0.526681	0.635942	0.407563	0.83893	FALSE	133.597	146.939
sgRNA1019	SPV_0713	SPV_0713	8.45098	0.921723	4.78883e-20	3.58683e-17	TRUE	1055.66	1.25993
sgRNA1020	SPV_0715	SPV_0715	-0.488466	0.301778	0.105527	0.60174	FALSE	148.877	215.427
sgRNA1021	SPV_0729	SPV_0729	-0.271865	0.428764	0.526037	0.889395	FALSE	205.528	233.104
sgRNA1022	SPV_0730	deoD	0.102774	0.735665	0.888895	0.982441	FALSE	137.953	99.8269
sgRNA1023	SPV_0731	flaR	-0.0808474	0.865395	0.925568	0.991774	FALSE	148.724	145.026
sgRNA1024	SPV_0734	SPV_0734	0.354517	0.36391	0.329962	0.819042	FALSE	178.984	174.974
sgRNA1025	SPV_0736	pdp	0.676969	0.864189	0.433417	0.845021	FALSE	138.722	106.064
sgRNA1026	SPV_0740	SPV_0740	0.649	0.656308	0.322729	0.819042	FALSE	61.1907	40.3863
sgRNA1027	SPV_0741	SPV_0741	0.14074	0.467695	0.763474	0.9474	FALSE	62.7751	53.1944
sgRNA1028	SPV_0742	SPV_0742	-0.651336	0.590013	0.269621	0.804464	FALSE	47.9199	66.2313
sgRNA1029	SPV_0747	SPV_0747	0.371112	0.513001	0.469425	0.867177	FALSE	47.6569	66.8307
sgRNA1030	SPV_1879,SPV_1880,SPV_0756	tRNA-Leu-6,tRNA-Gln-2,tRNA-Gln-1	2.32129	1.22975	0.0590777	0.464981	FALSE	27.7298	8.68966
sgRNA1031	SPV_0758,SPV_2237,SPV_1681,SPV_2406,SPV_2275,SPV_0966	SPV_0758,SPV_2237,SPV_1681,SPV_2406,SPV_2275,SPV_0966	-0.909294	0.857888	0.28918	0.817735	FALSE	127.349	170.487
sgRNA1032	SPV_0773	fruA	-0.0246397	0.850102	0.976877	0.994736	FALSE	94.7941	34.2719
sgRNA1033	SPV_0795	SPV_0795	0.276535	0.289245	0.339043	0.825831	FALSE	209.554	170.793
sgRNA1034	SPV_0796	SPV_0796	-0.268312	0.443652	0.545326	0.893397	FALSE	100.244	111.983
sgRNA1035	SPV_0797	SPV_0797	-0.025675	0.507782	0.959674	0.993482	FALSE	84.0314	98.15
sgRNA1036	SPV_0798	SPV_0798	0.356891	0.410722	0.384883	0.834377	FALSE	173.474	133.001
sgRNA1037	SPV_0804	SPV_0804	0.0392676	0.695497	0.954976	0.993482	FALSE	132.941	89.5604
sgRNA1038	SPV_0805	SPV_0805	0.162053	0.38608	0.674677	0.933209	FALSE	148.761	182.739
sgRNA1039	SPV_0806	SPV_0806	0.222072	0.62422	0.722021	0.935178	FALSE	74.0516	60.0669
sgRNA1040	SPV_0807,SPV_1342	SPV_0807,SPV_1342	0.462812	0.853391	0.587598	0.906277	FALSE	172.37	163.742
sgRNA1041	SPV_0809	cad	-0.635821	0.483203	0.188225	0.70667	FALSE	133.621	185.544
sgRNA1042	SPV_0810,SPV_2248	SPV_0810,SPV_2248	0.389271	0.893259	0.662991	0.929786	FALSE	136.663	91.3922
sgRNA1043	SPV_0811	speE	-1.07471	0.781454	0.169046	0.697608	FALSE	121.058	181.058
sgRNA1044	SPV_0812	lys1	-0.41611	0.44914	0.354207	0.832705	FALSE	137.003	192.871
sgRNA1045	SPV_0813	nspC	0.430389	0.432624	0.319817	0.819042	FALSE	220.403	168.779
sgRNA1046	SPV_0814	aguA	-0.0611449	0.375696	0.870715	0.975947	FALSE	181.344	189.119
sgRNA1047	SPV_0815	SPV_0815	-0.329512	0.302844	0.276568	0.804464	FALSE	152.064	190.436
sgRNA1048	SPV_0821	cbpE	0.47441	0.65792	0.470863	0.867177	FALSE	126.825	115.697
sgRNA1049	SPV_0823	proA	-1.17511	0.731555	0.108205	0.607081	FALSE	100.379	139.483
sgRNA1050	SPV_0824	proC	0.280219	0.51879	0.589101	0.906277	FALSE	235.957	244.409
sgRNA1051	SPV_0826	holB	1.11042	0.422477	0.00858015	0.132506	FALSE	57.413	31.1577
sgRNA1052	SPV_0828	SPV_0828	-0.148146	0.523484	0.777176	0.953021	FALSE	197.235	168.192
sgRNA1053	SPV_0829	SPV_0829	0.178777	0.386558	0.643734	0.927301	FALSE	291.242	266.902
sgRNA1054	SPV_0831	SPV_0831	0.26618	0.86274	0.75768	0.944026	FALSE	153.357	173.016
sgRNA1055	SPV_0836	SPV_0836	-0.547266	0.675198	0.417637	0.84076	FALSE	61.512	101.037
sgRNA1056	SPV_0837	SPV_0837	-0.0882805	0.580891	0.879207	0.979467	FALSE	143.714	141.197
sgRNA1057	SPV_0841,SPV_2255	ald,SPV_2255	-0.698382	0.564476	0.216005	0.754254	FALSE	109.72	150.861
sgRNA1058	SPV_0849	rplT	4.7463	1.3378	0.000388412	0.0112163	TRUE	56.7433	2.83484
sgRNA1059	SPV_0850	gloA	-0.586477	0.453967	0.196394	0.717557	FALSE	102.418	145.371
sgRNA1060	SPV_0857	era	-0.148466	0.477568	0.755893	0.944026	FALSE	89.1666	132.476
sgRNA1061	SPV_0858	mutM	0.502187	0.603549	0.405377	0.83893	FALSE	159.807	92.458
sgRNA1062	SPV_0860	pmrA	-0.152685	0.636616	0.810456	0.960053	FALSE	107.386	103.86
sgRNA1063	SPV_0862	rnr	-0.26406	0.64492	0.682212	0.934749	FALSE	88.6646	87.4904
sgRNA1064	SPV_0863	smpB	0.372008	0.70654	0.598526	0.91117	FALSE	64.6539	70.6471
sgRNA1065	SPV_0864	tehB	-0.985692	0.903571	0.275323	0.804464	FALSE	77.2069	114.484
sgRNA1066	SPV_0870	gpmB2	0.0542392	0.469867	0.9081	0.983057	FALSE	122.237	98.9452
sgRNA1067	SPV_0876	SPV_0876	-1.35691	0.395711	0.000605694	0.0162023	TRUE	67.9555	204.849
sgRNA1068	SPV_0883	SPV_0883	0.299283	0.836967	0.720657	0.935178	FALSE	140.787	103.73
sgRNA1069	SPV_0884	SPV_0884	-0.328587	0.392055	0.401967	0.83893	FALSE	129.411	196.743
sgRNA1070	SPV_0905	bltD	-0.0273534	0.511117	0.95732	0.993482	FALSE	75.1334	92.2669
sgRNA1071	SPV_0907	hemK	1.5585	0.936235	0.0959844	0.594063	FALSE	32.7586	13.7244
sgRNA1072	SPV_0909	SPV_0909	1.57416	1.0909	0.149022	0.666371	FALSE	74.836	22.8256
sgRNA1073	SPV_0910	glyA	1.10663	0.374705	0.00314349	0.0588618	FALSE	300.963	144.82
sgRNA1074	SPV_0911	SPV_0911	2.21292	0.30534	4.24854e-13	1.27286e-10	TRUE	500.767	90.7624
sgRNA1075	SPV_0912	pvaA	0.566395	0.702908	0.420365	0.841145	FALSE	117.114	49.7139
sgRNA1076	SPV_0920	SPV_0920	1.45855	0.789811	0.064789	0.484676	FALSE	161.336	109.876
sgRNA1077	SPV_0924	SPV_0924	-0.650568	0.407803	0.110645	0.609363	FALSE	42.137	62.7532
sgRNA1078	SPV_0925	SPV_0925	-0.239249	0.867482	0.782704	0.953105	FALSE	134.834	129.704
sgRNA1079	SPV_0934	SPV_0934	-0.0199891	0.403616	0.960501	0.993482	FALSE	92.2836	85.9882
sgRNA1080	SPV_0935	SPV_0935	0.188476	0.839727	0.822408	0.963779	FALSE	120.915	174.162
sgRNA1081	SPV_0940	rffD	-0.457236	0.406009	0.260093	0.801998	FALSE	88.7845	102.598
sgRNA1082	SPV_0941	SPV_0941	0.0205613	0.407952	0.959802	0.993482	FALSE	130.902	156.204
sgRNA1083	SPV_0943	SPV_0943	0.249761	0.363002	0.491426	0.876586	FALSE	141.881	126.424
sgRNA1084	SPV_0944	SPV_0944	-0.259739	0.466275	0.577493	0.902425	FALSE	114.206	138.558
sgRNA1085	SPV_0945	SPV_0945	-1.09398	0.723368	0.130447	0.633607	FALSE	87.1926	113.459
sgRNA1086	SPV_0946	SPV_0946	1.57067	1.17255	0.180396	0.699139	FALSE	20.369	7.38854
sgRNA1087	SPV_0947	SPV_0947	0.794827	0.727169	0.274375	0.804464	FALSE	76.8672	74.7102
sgRNA1088	SPV_0948	nikS	0.126692	0.520417	0.807662	0.960053	FALSE	75.3524	59.4855
sgRNA1089	SPV_0949	SPV_0949	0.0644942	0.398584	0.871457	0.975947	FALSE	219.851	222.773
sgRNA1090	SPV_0950	mefE	-0.00638259	0.440531	0.98844	0.996422	FALSE	193.092	241.033
sgRNA1091	SPV_0951	SPV_0951	0.35662	0.364427	0.327789	0.819042	FALSE	131.716	115.72
sgRNA1092	SPV_0955	trpY	0.589353	0.436747	0.177204	0.699139	FALSE	114.736	101.969
sgRNA1093	SPV_0956	SPV_0956	-0.402562	0.573992	0.483093	0.870029	FALSE	47.7228	68.8835
sgRNA1094	SPV_0961	lafA	0.324342	0.481957	0.500967	0.881139	FALSE	189.114	174.956
sgRNA1095	SPV_0962	SPV_0962	-0.18527	0.83444	0.824291	0.963779	FALSE	108.351	102.832
sgRNA1096	SPV_0968	SPV_0968	0.77421	0.55311	0.161591	0.683794	FALSE	130.645	57.619
sgRNA1097	SPV_0969	SPV_0969	0.550845	0.681639	0.419023	0.840843	FALSE	83.6308	63.5066
sgRNA1098	SPV_0977	SPV_0977	0.552774	0.841977	0.51149	0.883327	FALSE	131.971	109.854
sgRNA1099	SPV_0978	SPV_0978	0.2724	0.429255	0.525698	0.889395	FALSE	136.24	160.374
sgRNA1100	SPV_1641,SPV_2401,SPV_0986,SPV_2272	SPV_1641,SPV_2401,SPV_0986,SPV_2272	0.254053	0.492982	0.606317	0.915855	FALSE	140.701	124.499
sgRNA1101	SPV_0993,SPV_0992	SPV_0993,SPV_0992	-0.146579	0.353915	0.678753	0.933782	FALSE	153.935	145.121
sgRNA1102	SPV_0993	SPV_0993	-0.00911837	0.740711	0.990178	0.997084	FALSE	162.291	119.648
sgRNA1103	SPV_1003	SPV_1003	0.426029	0.314436	0.17545	0.699139	FALSE	146.168	120.79
sgRNA1104	SPV_1009	serB	0.323056	0.999792	0.746602	0.939012	FALSE	49.6769	46.2648
sgRNA1105	SPV_1011	glxK	-0.190342	0.849728	0.822755	0.963779	FALSE	48.1842	48.2017
sgRNA1106	SPV_1013	SPV_1013	0.301817	0.43878	0.491544	0.876586	FALSE	209.352	141.182
sgRNA1107	SPV_1021	SPV_1021	0.521016	0.336033	0.121024	0.618749	FALSE	131.654	114.885
sgRNA1108	SPV_1024	lplA	0.0495021	0.390197	0.899048	0.983057	FALSE	171.147	163.984
sgRNA1109	SPV_1025	acoL	0.21611	0.49921	0.665084	0.930248	FALSE	109.538	114.74
sgRNA1110	SPV_1026	acoC	-0.381479	0.489325	0.435624	0.845021	FALSE	129.397	157.966
sgRNA1111	SPV_1027	acoB	0.0370832	0.414075	0.928639	0.992643	FALSE	149.506	149.988
sgRNA1112	SPV_1029	pdrM	0.379445	0.525795	0.470504	0.867177	FALSE	100.302	52.396
sgRNA1113	SPV_1046	lacG-2	-0.0639972	0.522463	0.90251	0.983057	FALSE	57.8409	60.6521
sgRNA1114	SPV_1047	lacE-2	0.247986	0.465995	0.594612	0.909015	FALSE	110.532	115.811
sgRNA1115	SPV_1048	lacF-2	0.614664	0.404121	0.128262	0.628094	FALSE	109.263	76.1736
sgRNA1116	SPV_1049	lacT	0.330599	1.04448	0.751607	0.942182	FALSE	77.4534	113.481
sgRNA1117	SPV_1054	SPV_1054	-0.607099	0.790015	0.442211	0.8471	FALSE	200.649	203.77
sgRNA1118	SPV_1057,SPV_0560,SPV_0561,SPV_0562	SPV_1057,SPV_0560,SPV_0561,bgaA	-0.119848	0.286242	0.675439	0.933401	FALSE	115.836	131.896
sgRNA1119	SPV_1059	SPV_1059	-0.795318	0.747355	0.287249	0.814959	FALSE	130.249	150.928
sgRNA1120	SPV_1061	pphA	-0.452985	0.516665	0.380623	0.834293	FALSE	112.019	140.249
sgRNA1121	SPV_1062	recN	-0.922006	0.804073	0.251518	0.795642	FALSE	22.8938	36.3786
sgRNA1122	SPV_1063	ahrC	0.104884	0.550134	0.848799	0.968993	FALSE	115.602	77.0538
sgRNA1123	SPV_1066	xseB	1.75155	0.934363	0.060849	0.469855	FALSE	53.3195	31.5727
sgRNA1124	SPV_1069	SPV_1069	0.793895	0.898143	0.376734	0.834293	FALSE	67.5851	46.0444
sgRNA1125	SPV_1070	truB	0.517838	0.51393	0.313644	0.819042	FALSE	112.117	111.287
sgRNA1126	SPV_1071	SPV_1071	-1.10684	0.426154	0.00939654	0.139367	FALSE	147.197	275.634
sgRNA1127	SPV_1076	srtA	1.60927	0.682182	0.0183241	0.230947	FALSE	252.115	128.619
sgRNA1128	SPV_1092	SPV_1092	-1.4317	0.799914	0.0734841	0.526695	FALSE	13.8291	53.4948
sgRNA1129	SPV_1094,SPV_1095	SPV_1094,SPV_1095	0.37069	0.330554	0.26211	0.801998	FALSE	148.104	151.82
sgRNA1130	SPV_1095	SPV_1095	-0.0302463	0.466339	0.948286	0.993482	FALSE	70.4256	86.2744
sgRNA1131	SPV_1102	SPV_1102	1.64901	0.885155	0.0624674	0.472607	FALSE	137.797	52.7359
sgRNA1132	SPV_1103	SPV_1103	1.15582	0.675899	0.0872554	0.575809	FALSE	127.975	50.5872
sgRNA1133	SPV_1108	SPV_1108	0.411303	0.450523	0.361271	0.832705	FALSE	125.082	108.683
sgRNA1134	SPV_1109	SPV_1109	0.564026	0.587357	0.336915	0.825468	FALSE	218.369	155.448
sgRNA1135	SPV_1110	SPV_1110	-0.0244199	0.640045	0.969565	0.994736	FALSE	97.7223	130.88
sgRNA1136	SPV_1111	SPV_1111	-0.162611	0.391564	0.677933	0.933782	FALSE	107.823	102.385
sgRNA1137	SPV_1112	SPV_1112	0.0675353	0.539001	0.900288	0.983057	FALSE	153.025	170.275
sgRNA1138	SPV_1113	SPV_1113	0.149003	0.379229	0.694385	0.935178	FALSE	229.046	195.708
sgRNA1139	SPV_1115	leuB	1.28223	0.546554	0.0189752	0.234916	FALSE	183.45	77.7765
sgRNA1140	SPV_1116,SPV_2313	leuA,SPV_2313	-0.446306	0.550421	0.417455	0.84076	FALSE	114.621	141.773
sgRNA1141	SPV_1117	SPV_1117	-0.615851	0.616614	0.317909	0.819042	FALSE	83.1888	104.352
sgRNA1142	SPV_1130	licD2	1.77358	0.498964	0.000378664	0.0112163	TRUE	352.506	153.379
sgRNA1143	SPV_1135	nth	0.0957781	0.862921	0.911622	0.984683	FALSE	83.7774	78.1469
sgRNA1144	SPV_1137	SPV_1137	-0.555111	0.415658	0.181713	0.699139	FALSE	159.444	235.376
sgRNA1145	SPV_1147	tRNA-Arg-2	0.284953	0.370634	0.441997	0.8471	FALSE	124.141	122.571
sgRNA1146	SPV_1155	efeU	0.188054	0.382913	0.623346	0.920881	FALSE	209.426	210.749
sgRNA1147	SPV_1156	efeB	-0.497597	0.552631	0.367899	0.832705	FALSE	101.433	141.875
sgRNA1148	SPV_1159	SPV_1159	0.674884	0.817012	0.408781	0.83893	FALSE	123.456	145.721
sgRNA1149	SPV_1160	SPV_1160	0.32933	0.539344	0.541457	0.893397	FALSE	107.012	100.163
sgRNA1150	SPV_1162	SPV_1162	-0.518957	0.866721	0.549333	0.893397	FALSE	94.6205	102.579
sgRNA1151	SPV_1164	cdd-2	-0.405417	0.489912	0.407937	0.83893	FALSE	122.591	117.07
sgRNA1152	SPV_1165	SPV_1165	0.131136	0.525309	0.802869	0.958325	FALSE	128.591	139.063
sgRNA1153	SPV_1166	SPV_1166	0.123849	0.444531	0.780547	0.953105	FALSE	171.439	173.277
sgRNA1154	SPV_1167	appD	-0.834074	0.787778	0.289705	0.817735	FALSE	135.219	142.916
sgRNA1155	SPV_1168	appC	0.170577	0.453412	0.706763	0.935178	FALSE	96.2973	96.6904
sgRNA1156	SPV_1169	appB	0.606212	0.73284	0.408118	0.83893	FALSE	86.4245	77.9154
sgRNA1157	SPV_1174	SPV_1174	-0.289806	0.371454	0.435277	0.845021	FALSE	108.734	183.531
sgRNA1158	SPV_1175	SPV_1175	0.176505	0.392598	0.653011	0.928526	FALSE	104.829	99.6583
sgRNA1159	SPV_1176	SPV_1176	0.08441	0.858859	0.921709	0.989569	FALSE	63.7802	66.9481
sgRNA1160	SPV_1177	SPV_1177	-1.20091	0.855522	0.160404	0.682627	FALSE	165.948	210.708
sgRNA1161	SPV_1178	ptrB	-1.02499	0.506705	0.0430887	0.385773	FALSE	48.7313	56.7463
sgRNA1162	SPV_1179	lanL	0.0545903	0.39939	0.89128	0.982441	FALSE	146.787	164.017
sgRNA1163	SPV_1186	SPV_1186	0.10746	0.650257	0.868741	0.975046	FALSE	118.002	106.562
sgRNA1164	SPV_1189	SPV_1189	-0.517717	0.513244	0.313111	0.819042	FALSE	102.561	178.06
sgRNA1165	SPV_1191	SPV_1191	0.27674	0.496985	0.577639	0.902425	FALSE	176.818	177.666
sgRNA1166	SPV_1192	SPV_1192	-0.309618	0.563623	0.582775	0.905493	FALSE	58.7394	75.1817
sgRNA1167	SPV_1206	SPV_1206	0.32633	0.507877	0.520523	0.887569	FALSE	164.827	147.569
sgRNA1168	SPV_1207	tyrA	0.703875	0.860818	0.413539	0.83893	FALSE	176.182	119.755
sgRNA1169	SPV_1208	aroC	-0.763536	0.717424	0.287205	0.814959	FALSE	68.1444	84.8777
sgRNA1170	SPV_1209	aroB	0.00194269	0.33258	0.995339	0.997664	FALSE	217	191.924
sgRNA1171	SPV_1210	aroE	1.26566	0.9924	0.202186	0.735133	FALSE	75.1619	36.793
sgRNA1172	SPV_1211	aroD	0.0553474	0.566633	0.922188	0.989569	FALSE	82.4611	67.4429
sgRNA1173	SPV_1223	SPV_1223	-0.739944	0.792422	0.35042	0.832705	FALSE	85.6769	109.598
sgRNA1174	SPV_1225	SPV_1225	-0.321393	0.9292	0.729432	0.935588	FALSE	92.3452	112.286
sgRNA1175	SPV_1227	phoU2	0.474951	0.378043	0.208993	0.750579	FALSE	166.421	149.925
sgRNA1176	SPV_1228	pstB2-2	0.658488	1.13743	0.562638	0.900946	FALSE	15.1389	20.479
sgRNA1177	SPV_1229	pstB2-1	-0.698374	0.896046	0.435747	0.845021	FALSE	133.855	157.115
sgRNA1178	SPV_1230	pstA2	-0.377673	0.314607	0.229961	0.770985	FALSE	98.8224	125.457
sgRNA1179	SPV_1231	pstC2	0.312618	0.838946	0.709422	0.935178	FALSE	90.7101	105.668
sgRNA1180	SPV_1232	pstS2	-0.369389	0.875084	0.672939	0.933209	FALSE	74.8275	81.7217
sgRNA1181	SPV_1233	SPV_1233	-0.257476	0.48552	0.595896	0.909015	FALSE	57.2859	81.0343
sgRNA1182	SPV_1237	SPV_1237	-0.089136	0.540242	0.86895	0.975046	FALSE	102.786	105.486
sgRNA1183	SPV_1241	SPV_1241	-0.0209644	0.718187	0.976712	0.994736	FALSE	89.3004	90.6316
sgRNA1184	SPV_1242	SPV_1242	-0.409701	0.630755	0.515989	0.885941	FALSE	126.169	124.63
sgRNA1185	SPV_1248	cbpM	-0.791214	0.968804	0.414105	0.83893	FALSE	39.6817	44.6734
sgRNA1186	SPV_1252	SPV_1252	-0.446928	0.623095	0.473207	0.867177	FALSE	93.2725	78.3168
sgRNA1187	SPV_1253	SPV_1253	-0.187739	0.516306	0.716142	0.935178	FALSE	93.2735	104.555
sgRNA1188	SPV_1254	SPV_1254	0.0271116	0.509023	0.957523	0.993482	FALSE	89.565	80.461
sgRNA1189	SPV_1255	SPV_1255	-0.0927064	0.265123	0.726584	0.935178	FALSE	177.986	177.201
sgRNA1190	SPV_1256,SPV_1258	SPV_1256,SPV_1258	-0.250733	0.418869	0.549443	0.893397	FALSE	112.267	120.721
sgRNA1191	SPV_1257	SPV_1257	-0.328711	0.833548	0.693322	0.935178	FALSE	105.754	106.116
sgRNA1192	SPV_1261	SPV_1261	0.236615	0.541178	0.66195	0.929786	FALSE	126.587	137.99
sgRNA1193	SPV_1263	SPV_1263	-0.823505	0.554427	0.137457	0.643055	FALSE	136.636	215.487
sgRNA1194	SPV_1264	SPV_1264	0.378107	0.955527	0.692322	0.935178	FALSE	121.623	139.735
sgRNA1195	SPV_1265	SPV_1265	-0.822337	0.402118	0.0408534	0.370899	FALSE	153.658	195.35
sgRNA1196	SPV_1266	SPV_1266	0.482083	0.837979	0.565094	0.900946	FALSE	91.8747	80.8601
sgRNA1197	SPV_1267	SPV_1267	0.120622	0.296899	0.684542	0.934749	FALSE	149.723	145.651
sgRNA1198	SPV_1272	SPV_1272	0.104951	0.402361	0.794217	0.958168	FALSE	108.649	94.8937
sgRNA1199	SPV_1275	nagR	0.57352	0.601454	0.340308	0.82664	FALSE	103.639	73.1136
sgRNA1200	SPV_1276	SPV_1276	-0.425351	0.454448	0.349287	0.832705	FALSE	196.363	208.47
sgRNA1201	SPV_1277	SPV_1277	0.142447	0.328057	0.664133	0.929786	FALSE	294.595	255.614
sgRNA1202	SPV_1279	SPV_1279	-0.00393407	0.48302	0.993502	0.997664	FALSE	211.098	194.501
sgRNA1203	SPV_1284	SPV_1284	-0.564259	0.884435	0.523481	0.887569	FALSE	61.1225	62.302
sgRNA1204	SPV_1296	pdxT	0.322683	0.896981	0.719039	0.935178	FALSE	95.3315	89.7218
sgRNA1205	SPV_1297	pdxS	0.0818479	0.579109	0.887606	0.982004	FALSE	264.118	316.503
sgRNA1206	SPV_1299	SPV_1299	1.02157	0.614395	0.0963666	0.594063	FALSE	85.4649	54.0858
sgRNA1207	SPV_1312	yfmL	-0.119235	0.422896	0.777983	0.953021	FALSE	178.827	211.017
sgRNA1208	SPV_2155,SPV_0359,SPV_2179,SPV_0499,SPV_1315,SPV_2347,SPV_1421,SPV_2361,SPV_0743,SPV_2229	SPV_2155,SPV_0359,SPV_2179,SPV_0499,SPV_1315,SPV_2347,SPV_1421,SPV_2361,SPV_0743,SPV_2229	0.541957	0.835958	0.516787	0.885941	FALSE	102.606	115.496
sgRNA1209	SPV_1319	SPV_1319	-0.648081	0.795997	0.415545	0.83893	FALSE	89.0908	95.7998
sgRNA1210	SPV_1321,SPV_1322	mucB,SPV_1322	-0.285705	0.75179	0.703921	0.935178	FALSE	120.032	104.846
sgRNA1211	SPV_1322	SPV_1322	0.0236733	0.507386	0.962786	0.993482	FALSE	160.599	183.234
sgRNA1212	SPV_1323	SPV_1323	-0.849467	0.528283	0.10784	0.607081	FALSE	74.5502	146.619
sgRNA1213	SPV_1343	SPV_1343	0.825399	0.918414	0.3688	0.832705	FALSE	79.3963	68.8337
sgRNA1214	SPV_1344	SPV_1344	1.9444	1.08418	0.0729034	0.525045	FALSE	76.6644	39.8593
sgRNA1215	SPV_1347	SPV_1347	1.37951	0.892027	0.121987	0.621553	FALSE	85.1713	49.2166
sgRNA1216	SPV_1348	SPV_1348	2.48115	1.0373	0.0167597	0.218313	FALSE	13.474	4.34709
sgRNA1217	SPV_1361,SPV_2355	SPV_1361,SPV_2355	0.867435	1.01397	0.392284	0.837662	FALSE	150.581	96.5008
sgRNA1218	SPV_1362	SPV_1362	-1.45888	0.578274	0.0116421	0.166094	FALSE	110.718	176.353
sgRNA1219	SPV_1372	SPV_1372	0.828594	1.31122	0.527435	0.889875	FALSE	21.5928	10.2192
sgRNA1220	SPV_1376	pclA	0.02457	0.79093	0.975218	0.994736	FALSE	59.1551	38.0332
sgRNA1221	SPV_1377	mga1	0.530549	0.517448	0.305213	0.819042	FALSE	56.4086	57.8753
sgRNA1222	SPV_1393	SPV_1393	-0.432664	0.437886	0.323116	0.819042	FALSE	59.1843	94.3188
sgRNA1223	SPV_1397	aldR	-0.494144	0.684018	0.47004	0.867177	FALSE	149.159	164.873
sgRNA1224	SPV_1400	SPV_1400	-1.06071	0.77834	0.172949	0.699139	FALSE	37.9169	38.5178
sgRNA1225	SPV_1414	oxlT	-0.630624	0.436321	0.148368	0.665434	FALSE	72.6327	84.3319
sgRNA1226	SPV_1425	SPV_1425	-0.737686	0.415685	0.0759595	0.535168	FALSE	177.374	229.329
sgRNA1227	SPV_1426	SPV_1426	0.223664	0.663749	0.736139	0.935588	FALSE	143.948	131.459
sgRNA1228	SPV_1433	SPV_1433	0.0654734	1.17964	0.955738	0.993482	FALSE	58.3081	40.9253
sgRNA1229	SPV_1434	ybgI	-0.832861	0.496262	0.093295	0.587507	FALSE	113.312	162.059
sgRNA1230	SPV_1440	SPV_1440	0.173068	0.651337	0.790461	0.958168	FALSE	164.621	127.944
sgRNA1231	SPV_1441	SPV_1441	0.557424	0.822285	0.497837	0.878957	FALSE	86.1389	93.4548
sgRNA1232	SPV_1454	SPV_1454	0.0272444	0.873373	0.975114	0.994736	FALSE	65.6618	65.312
sgRNA1233	SPV_1457	dtd	0.85682	0.853536	0.315453	0.819042	FALSE	96.2403	69.2416
sgRNA1234	SPV_1465	SPV_1465	-0.28579	0.440942	0.516898	0.885941	FALSE	59.1929	57.9026
sgRNA1235	SPV_1469	SPV_1469	0.279071	0.893785	0.754862	0.944026	FALSE	81.975	90.1564
sgRNA1236	SPV_1475	ylmH	7.07439	1.41182	5.4195e-07	4.51023e-05	TRUE	46.1643	0
sgRNA1237	SPV_1476	ylmG	1.41518	1.19939	0.238033	0.780675	FALSE	75.3066	17.6077
sgRNA1238	SPV_1477	sepF	1.14627	0.89	0.197765	0.720807	FALSE	25.0075	11.6536
sgRNA1239	SPV_1478	ylmE	0.217491	0.937306	0.816508	0.963779	FALSE	173.18	219.336
sgRNA1240	SPV_1482	SPV_1482	-0.699732	0.54069	0.195615	0.716456	FALSE	51.3751	68.4266
sgRNA1241	SPV_1488	nanK	0.492541	0.367407	0.180055	0.699139	FALSE	212.77	167.978
sgRNA1242	SPV_1490	SPV_1490	-0.169891	1.17433	0.884972	0.980538	FALSE	124.883	130.127
sgRNA1243	SPV_1491	SPV_1491	-0.126702	0.282282	0.65354	0.928526	FALSE	208.932	245.888
sgRNA1244	SPV_1492	yjgK	-0.125323	0.554835	0.821299	0.963779	FALSE	174.926	184.245
sgRNA1245	SPV_1493	satC	0.926023	0.847548	0.274574	0.804464	FALSE	118.245	99.9969
sgRNA1246	SPV_1494	satB	-0.28681	0.469087	0.54092	0.893397	FALSE	151.785	204.17
sgRNA1247	SPV_1495	satA	0.441953	0.534046	0.407922	0.83893	FALSE	94.2618	109.128
sgRNA1248	SPV_1496	nanP	-0.0237905	0.76661	0.975243	0.994736	FALSE	71.9925	86.3284
sgRNA1249	SPV_1497	nanE-1	-0.555574	0.985965	0.573106	0.901197	FALSE	47.0281	66.5435
sgRNA1250	SPV_1498	SPV_1498	-0.196602	0.587617	0.737945	0.935588	FALSE	121.019	153.552
sgRNA1251	SPV_1499	nanB	0.56379	0.812376	0.487681	0.87443	FALSE	139.977	122.98
sgRNA1252	SPV_1500	SPV_1500	-0.146105	0.623543	0.814741	0.962525	FALSE	25.8569	32.579
sgRNA1253	SPV_1501	ycjO	-0.816056	0.544776	0.134142	0.638873	FALSE	155.55	191.214
sgRNA1254	SPV_1502	SPV_1502	0.416852	0.363084	0.250932	0.795642	FALSE	128.723	119.084
sgRNA1255	SPV_1503	SPV_1503	0.0251652	0.35851	0.944039	0.993482	FALSE	137.348	136.294
sgRNA1256	SPV_1507	recG	0.084863	0.442407	0.847882	0.968993	FALSE	181.808	171.202
sgRNA1257	SPV_1510	aroF	0.607625	0.750469	0.418135	0.84076	FALSE	190.063	117.082
sgRNA1258	SPV_1511	aroG	1.69517	0.513366	0.000959774	0.0239624	TRUE	100.8	32.7735
sgRNA1259	SPV_1513,SPV_2380	SPV_1513,SPV_2380	-0.320212	0.431486	0.458017	0.856567	FALSE	171.486	167.493
sgRNA1260	SPV_1514	SPV_1514	-0.337884	0.321495	0.293269	0.817735	FALSE	87.7495	110.219
sgRNA1261	SPV_1515	SPV_1515	-0.132672	0.321077	0.679454	0.933782	FALSE	143.728	142.083
sgRNA1262	SPV_1516	SPV_1516	-0.134243	0.285729	0.638479	0.927301	FALSE	270.352	286.35
sgRNA1263	SPV_1517	SPV_1517	0.151942	0.494491	0.758638	0.944026	FALSE	201.588	203.264
sgRNA1264	SPV_1520	frp	1.87115	1.18391	0.113996	0.612909	FALSE	24.2849	11.5925
sgRNA1265	SPV_1529,SPV_2385	SPV_1529,SPV_2385	0.162102	0.463727	0.726667	0.935178	FALSE	251.679	244.494
sgRNA1266	SPV_1533	SPV_1533	-0.411092	0.669427	0.539153	0.893397	FALSE	48.529	72.9541
sgRNA1267	SPV_1539,SPV_2387	SPV_1539,SPV_2387	0.294481	0.442518	0.505753	0.881139	FALSE	205.197	160.447
sgRNA1268	SPV_1540	SPV_1540	0.490089	0.49412	0.321274	0.819042	FALSE	194.02	202.133
sgRNA1269	SPV_1544	sun	-0.491175	0.496336	0.322369	0.819042	FALSE	126.787	134.146
sgRNA1270	SPV_1552	SPV_1552	-0.671295	0.419504	0.109552	0.608622	FALSE	100.141	148.035
sgRNA1271	SPV_1553	SPV_1553	-0.546184	0.462372	0.237497	0.780675	FALSE	53.1053	68.2329
sgRNA1272	SPV_1554	rsfA	-0.0844943	0.422991	0.841673	0.968993	FALSE	145.736	149.962
sgRNA1273	SPV_1564	SPV_1564	-0.581689	0.545488	0.286259	0.814959	FALSE	126.188	163.591
sgRNA1274	SPV_1568	queF	0.0715053	0.409697	0.861447	0.970159	FALSE	132.722	144.714
sgRNA1275	SPV_1570	SPV_1570	0.288227	0.48124	0.549222	0.893397	FALSE	129.523	111.211
sgRNA1276	SPV_1571	pepF2	-0.195313	0.243687	0.422848	0.841145	FALSE	255.555	257.9
sgRNA1277	SPV_1572	SPV_1572	-0.492871	0.475835	0.300294	0.817735	FALSE	130.654	156.498
sgRNA1278	SPV_1573	prmA	-0.198803	0.240666	0.408775	0.83893	FALSE	185.602	192.78
sgRNA1279	SPV_1574,SPV_1575	SPV_1574,SPV_1575	-0.64519	0.702181	0.358181	0.832705	FALSE	131.8	147.469
sgRNA1280	SPV_1575	SPV_1575	-0.276509	0.377969	0.464434	0.864783	FALSE	126.853	142.424
sgRNA1281	SPV_1577	hicB	-0.56243	0.799261	0.481627	0.870029	FALSE	131.881	130.3
sgRNA1282	SPV_1587	mga2	-0.584961	0.506146	0.247797	0.795642	FALSE	99.3366	102.62
sgRNA1283	SPV_1605	SPV_1605	-0.170644	0.49907	0.732408	0.935588	FALSE	105.729	123.73
sgRNA1284	SPV_1618	SPV_1618	-0.271838	0.527829	0.606545	0.915855	FALSE	111	154.125
sgRNA1285	SPV_1621	SPV_1621	0.44376	0.666515	0.505544	0.881139	FALSE	183.537	160.663
sgRNA1286	SPV_1622	SPV_1622	-0.384114	0.717265	0.592286	0.907203	FALSE	204.122	185.518
sgRNA1287	SPV_1627	SPV_1627	0.385758	0.446487	0.387596	0.837386	FALSE	125.552	116.878
sgRNA1288	SPV_1633	galT-2	-0.0432834	0.625127	0.944799	0.993482	FALSE	95.6887	97.9105
sgRNA1289	SPV_1634	galK	-0.444971	0.734099	0.544418	0.893397	FALSE	88.2801	77.4796
sgRNA1290	SPV_1639	sczA	-1.48867	1.19852	0.214202	0.754254	FALSE	8.67733	27.3565
sgRNA1291	SPV_1640	pnuC	-0.732732	0.561499	0.191908	0.714195	FALSE	97.2262	111.384
sgRNA1292	SPV_1648	SPV_1648	0.232034	0.398424	0.560311	0.900946	FALSE	258.393	242.96
sgRNA1293	SPV_1653	yidD	0.484454	0.533831	0.364141	0.832705	FALSE	211.009	184.275
sgRNA1294	SPV_1654	rluB	0.00246684	0.49915	0.996057	0.997664	FALSE	213.321	179.033
sgRNA1295	SPV_1657	xerD	0.363773	0.383112	0.342355	0.82664	FALSE	204.462	155.245
sgRNA1296	SPV_1664	treP	-0.0307031	0.612519	0.960022	0.993482	FALSE	143.226	180.699
sgRNA1297	SPV_1667	amiF	-1.08752	1.11227	0.328199	0.819042	FALSE	18.6336	56.0405
sgRNA1298	SPV_1668	amiE	-0.590038	0.445172	0.185033	0.699139	FALSE	48.3606	113.256
sgRNA1299	SPV_1669	amiD	-1.18585	0.569314	0.0372566	0.351008	FALSE	19.8461	28.9597
sgRNA1300	SPV_1670	amiC	-1.87157	0.888449	0.0351556	0.343267	FALSE	19.1845	66.2756
sgRNA1301	SPV_1673	gtfA	0.0402459	0.477621	0.932847	0.992643	FALSE	98.9213	108.774
sgRNA1302	SPV_0552,SPV_2196,SPV_1674,SPV_1942,SPV_1949,SPV_1939,SPV_0690	SPV_0552,SPV_2196,SPV_1674,SPV_1942,SPV_1949,SPV_1939,SPV_0690	-1.31944	0.662695	0.0464781	0.400139	FALSE	41.1339	100.068
sgRNA1303	SPV_1675	msmG	-0.554666	0.508756	0.275607	0.804464	FALSE	146.155	144.012
sgRNA1304	SPV_1676	msmF	0.582614	0.344946	0.0912195	0.586519	FALSE	193.816	160.479
sgRNA1305	SPV_1677	msmE	-0.0454068	0.582344	0.93785	0.993344	FALSE	177.204	139.252
sgRNA1306	SPV_1678	agaN	0.137926	0.508849	0.786349	0.956128	FALSE	73.1467	65.1622
sgRNA1307	SPV_1697,SPV_1811	tRNA-Asp-1,tRNA-Asp-2	5.73424	1.45744	8.33863e-05	0.00297411	TRUE	36.9084	0
sgRNA1308	SPV_1698,SPV_1812,SPV_1889	tRNA-Val-1,tRNA-Val-2,tRNA-Val-3	-0.438299	0.546192	0.422284	0.841145	FALSE	58.7121	69.5781
sgRNA1309	SPV_1707	SPV_1707	-0.42762	0.954535	0.654162	0.928526	FALSE	70.0667	62.302
sgRNA1310	SPV_0048,SPV_1708,SPV_2403,SPV_1666,SPV_2400,SPV_2271	SPV_0048,SPV_1708,SPV_2403,SPV_1666,SPV_2400,SPV_2271	0.0858619	0.473738	0.856177	0.968993	FALSE	136.038	128.415
sgRNA1311	SPV_1712	ydfG	-0.0903007	0.35613	0.799835	0.958168	FALSE	185.759	203.595
sgRNA1312	SPV_1713	SPV_1713	-1.25662	0.774715	0.104795	0.60174	FALSE	69.2381	147.411
sgRNA1313	SPV_1714	SPV_1714	-0.0646541	0.512331	0.899577	0.983057	FALSE	117.679	130.931
sgRNA1314	SPV_1731	SPV_1731	-0.0262764	0.329726	0.936482	0.993344	FALSE	111.023	106.895
sgRNA1315	SPV_1732,SPV_2416,SPV_1733	SPV_1732,SPV_2416,SPV_1733	0.0169042	0.476127	0.971678	0.994736	FALSE	185.719	149.85
sgRNA1316	SPV_1736	SPV_1736	1.16447	0.692453	0.0926348	0.587507	FALSE	118.121	90.1341
sgRNA1317	SPV_1762	endA	0.134789	0.863411	0.875945	0.978498	FALSE	121.047	133.604
sgRNA1318	SPV_1763	epuA	-0.176487	0.43752	0.686668	0.934749	FALSE	102.02	133.763
sgRNA1319	SPV_1775	lysA	-0.761712	0.396332	0.0546181	0.453809	FALSE	81.4173	100.761
sgRNA1320	SPV_1786	SPV_1786	0.197029	0.347891	0.571155	0.901197	FALSE	221.506	225.044
sgRNA1321	SPV_1789	diiA	0.297026	0.546203	0.586578	0.906277	FALSE	132.741	121.105
sgRNA1322	SPV_1795	SPV_1795	0.366032	0.38208	0.338063	0.825468	FALSE	138.034	97.5616
sgRNA1323	SPV_1826	nadC	-0.42939	0.472309	0.363282	0.832705	FALSE	136.847	133.382
sgRNA1324	SPV_1836	SPV_1836	-0.853616	0.413162	0.0388234	0.361226	FALSE	110.941	215.233
sgRNA1325	SPV_1837	SPV_1837	-0.125121	0.441263	0.776753	0.953021	FALSE	171.575	202.951
sgRNA1326	SPV_1842	ulaF	0.815548	0.838398	0.33068	0.819042	FALSE	126.21	109.216
sgRNA1327	SPV_1843	ulaE	-0.158357	0.43155	0.713656	0.935178	FALSE	137.604	184.926
sgRNA1328	SPV_1844	ulaD	-0.42982	0.394811	0.276298	0.804464	FALSE	188.236	207.752
sgRNA1329	SPV_1845	ulaC	0.354324	0.456158	0.437302	0.845021	FALSE	156.629	146.514
sgRNA1330	SPV_1846	ulaB	-0.0618579	0.396127	0.875909	0.978498	FALSE	112.746	137.042
sgRNA1331	SPV_1847	ulaA	0.0790443	0.320236	0.805039	0.959769	FALSE	214.872	240.621
sgRNA1332	SPV_1848	SPV_1848	0.335372	0.322182	0.297903	0.817735	FALSE	188.211	143.502
sgRNA1333	SPV_1850	yidC2	-0.0521398	0.380359	0.890967	0.982441	FALSE	183.452	207.271
sgRNA1334	SPV_1852	SPV_1852	0.91004	0.504401	0.0712002	0.517757	FALSE	150.606	98.6539
sgRNA1335	SPV_1868	tgt	0.767449	0.814333	0.345975	0.831894	FALSE	77.222	69.1038
sgRNA1336	SPV_1873	SPV_1873	-0.26171	0.584399	0.654278	0.928526	FALSE	153.474	185.843
sgRNA1337	SPV_1875	SPV_1875	1.33779	0.790744	0.0906818	0.586519	FALSE	101.544	46.9459
sgRNA1338	SPV_1876	SPV_1876	-0.187018	0.484072	0.699242	0.935178	FALSE	92.0332	78.6479
sgRNA1339	SPV_1882	tRNA-Trp-1	-0.255591	0.99892	0.798053	0.958168	FALSE	28.7565	38.3648
sgRNA1340	SPV_1883,SPV_0755	tRNA-Tyr-2,tRNA-Tyr-1	2.02715	1.08303	0.0612419	0.470351	FALSE	17.2883	6.7425
sgRNA1341	SPV_1682,SPV_1683,SPV_1684,SPV_1685,SPV_1884	tRNA-Ser-2,tRNA-Ile-1,tRNA-Gly-1,tRNA-Phe-1,tRNA-Phe-2	-0.0351819	0.339443	0.91745	0.987313	FALSE	88.1088	86.7797
sgRNA1342	SPV_1682,SPV_1683,SPV_1684,SPV_1685,SPV_1686,SPV_1885	tRNA-Ser-2,tRNA-Ile-1,tRNA-Gly-1,tRNA-Phe-1,tRNA-fMet-1,tRNA-fMet-2	4.83576	1.32757	0.000269941	0.00825249	TRUE	44.9314	1.41532
sgRNA1343	SPV_1682,SPV_1683,SPV_1684,SPV_1685,SPV_1686,SPV_1687,SPV_1886	tRNA-Ser-2,tRNA-Ile-1,tRNA-Gly-1,tRNA-Phe-1,tRNA-fMet-1,tRNA-Ser-3,tRNA-Ser-4	0.0785384	0.650363	0.903881	0.983057	FALSE	45.9958	49.7082
sgRNA1344	SPV_1682,SPV_1683,SPV_1684,SPV_1888	tRNA-Ser-2,tRNA-Ile-1,tRNA-Gly-1,tRNA-Gly-4	-0.77724	1.59219	0.625438	0.922132	FALSE	6.52582	14.523
sgRNA1345	SPV_1895	SPV_1895	1.31715	0.970801	0.174856	0.699139	FALSE	80.7224	49.0535
sgRNA1346	SPV_1900	patB	0.319726	0.257803	0.214902	0.754254	FALSE	239.604	193.316
sgRNA1347	SPV_1903	hexA	-0.330122	0.45262	0.465783	0.864783	FALSE	139.295	113.392
sgRNA1348	SPV_1906,SPV_1967	SPV_1906,SPV_1967	0.283105	0.322698	0.38032	0.834293	FALSE	247.248	187.689
sgRNA1349	SPV_1907	SPV_1907	-0.050561	0.585156	0.931144	0.992643	FALSE	97.2283	117.892
sgRNA1350	SPV_1910	pstS1	-0.394113	0.54948	0.473221	0.867177	FALSE	156.672	167.656
sgRNA1351	SPV_1911	pstC1	0.454334	0.278456	0.10276	0.599236	FALSE	233.119	166.366
sgRNA1352	SPV_1912	pstA1	1.43899	0.489312	0.00327318	0.0605337	FALSE	179.221	78.1153
sgRNA1353	SPV_1913	pstB1	0.167462	0.86767	0.846958	0.968993	FALSE	96.6315	118.346
sgRNA1354	SPV_1914	phoU1	0.449669	0.814552	0.580918	0.905441	FALSE	138.625	97.9234
sgRNA1355	SPV_1915,SPV_2435	SPV_1915,SPV_2435	-0.776036	0.401651	0.0533451	0.448938	FALSE	76.4274	155.808
sgRNA1356	SPV_1916	SPV_1916	-1.06981	0.804207	0.18343	0.699139	FALSE	86.183	141.668
sgRNA1357	SPV_1917	SPV_1917	-0.367075	0.741658	0.620643	0.920518	FALSE	477.854	1100.92
sgRNA1358	SPV_1920	SPV_1920	0.170278	0.495437	0.731077	0.935588	FALSE	119.142	125.234
sgRNA1359	SPV_1921	SPV_1921	-0.821374	0.632164	0.193839	0.716142	FALSE	162.208	223.324
sgRNA1360	SPV_1922	hipO	-0.598839	0.582994	0.304336	0.819042	FALSE	67.7092	81.6661
sgRNA1361	SPV_1930	SPV_1930	-0.377744	0.588171	0.520721	0.887569	FALSE	109.138	140.947
sgRNA1362	SPV_1931	SPV_1931	4.23778	1.29464	0.00106292	0.0252738	TRUE	59.6372	5.00131
sgRNA1363	SPV_1935	malC	-0.107172	0.296066	0.717361	0.935178	FALSE	127.046	128.158
sgRNA1364	SPV_1936	malD	0.159445	0.429687	0.710583	0.935178	FALSE	90.6771	93.8809
sgRNA1365	SPV_1944	SPV_1944	0.267744	0.497525	0.590471	0.906277	FALSE	134.812	105.257
sgRNA1366	SPV_1945	SPV_1945	-0.422195	1.42289	0.766683	0.948382	FALSE	40.1042	64.5677
sgRNA1367	SPV_1946	SPV_1946	-0.341407	0.500864	0.49547	0.878957	FALSE	85.3306	114.563
sgRNA1368	SPV_1947	SPV_1947	0.166149	0.421497	0.693443	0.935178	FALSE	232.59	244.655
sgRNA1369	SPV_1953	SPV_1953	-0.716821	0.582548	0.218513	0.757713	FALSE	133.584	150.087
sgRNA1370	SPV_2177,SPV_1955,SPV_0433	SPV_2177,SPV_1955,SPV_0433	0.490614	0.472892	0.299515	0.817735	FALSE	165.093	128.058
sgRNA1371	SPV_1957	tktC	-0.0759981	0.904039	0.933005	0.992643	FALSE	101.746	74.4784
sgRNA1372	SPV_1958	tktN	-0.371472	0.315319	0.238763	0.780934	FALSE	170.441	234.747
sgRNA1373	SPV_1959	ulaA2	0.570062	0.810161	0.481657	0.870029	FALSE	161.216	165.967
sgRNA1374	SPV_1960	ulaB2	-0.248854	0.349236	0.476114	0.869779	FALSE	292.131	324.383
sgRNA1375	SPV_1961	ulaR2	0.126233	0.534019	0.813135	0.961386	FALSE	133.126	129.717
sgRNA1376	SPV_1973	SPV_1973	0.676293	0.444615	0.128241	0.628094	FALSE	137.235	107.924
sgRNA1377	SPV_1976	arcB	0.172867	0.374979	0.644795	0.927301	FALSE	228.815	224.168
sgRNA1378	SPV_1977	arcC	0.77276	0.508117	0.128302	0.628094	FALSE	141.462	107.365
sgRNA1379	SPV_1978	arcD	1.08934	0.86793	0.209441	0.750579	FALSE	73.7013	40.0453
sgRNA1380	SPV_1979	SPV_1979	0.072651	0.683062	0.915296	0.985704	FALSE	112.114	111.475
sgRNA1381	SPV_1981	SPV_1981	-0.262181	0.647587	0.685582	0.934749	FALSE	105.548	112.663
sgRNA1382	SPV_1983	SPV_1983	0.210944	0.479484	0.659981	0.929786	FALSE	99.9717	69.1651
sgRNA1383	SPV_2002	dltD	-0.502283	0.616381	0.415136	0.83893	FALSE	96.3264	129.174
sgRNA1384	SPV_2003	dltC	-0.0132908	0.600217	0.982334	0.994736	FALSE	183.404	142.156
sgRNA1385	SPV_2004	dltB	0.384008	0.342428	0.262106	0.801998	FALSE	304.388	258.498
sgRNA1386	SPV_2005	dltA	-0.66619	0.894936	0.456635	0.856119	FALSE	71.4299	110.633
sgRNA1387	SPV_2008,SPV_2452	SPV_2008,SPV_2452	-0.330191	0.504762	0.513014	0.883327	FALSE	208.358	239.353
sgRNA1388	SPV_2009	SPV_2009	0.503708	0.868747	0.562043	0.900946	FALSE	66.6866	72.8294
sgRNA1389	SPV_2019	SPV_2019	-0.181601	0.456257	0.690612	0.935178	FALSE	117.371	133.768
sgRNA1390	SPV_2020	SPV_2020	0.173517	0.939393	0.853455	0.968993	FALSE	145.31	136.573
sgRNA1391	SPV_2021	SPV_2021	-0.532746	0.451419	0.237938	0.780675	FALSE	61.2351	74.9811
sgRNA1392	SPV_2214,SPV_2341,SPV_2342,SPV_2039,SPV_2323	SPV_2214,SPV_2341,SPV_2342,SPV_2039,SPV_2323	-0.345343	0.577748	0.550014	0.893397	FALSE	124.309	139.521
sgRNA1393	SPV_0713,SPV_2040,SPV_2457	SPV_0713,SPV_2040,SPV_2457	-0.181152	0.384072	0.637168	0.926678	FALSE	151.446	167.909
sgRNA1394	SPV_2046	cbiQ	1.95867	0.770895	0.0110609	0.160866	FALSE	165.351	45.4172
sgRNA1395	SPV_2047	cbiO2	0.468287	0.428794	0.274788	0.804464	FALSE	259.958	234.801
sgRNA1396	SPV_2048	cbiO1	1.79273	0.848453	0.0346062	0.343267	FALSE	168.295	58.7191
sgRNA1397	SPV_2058	SPV_2058	0.74448	0.833842	0.371948	0.834293	FALSE	95.0733	61.7421
sgRNA1398	SPV_2059,SPV_2460	SPV_2059,SPV_2460	0.0591251	0.504464	0.906699	0.983057	FALSE	78.2237	85.821
sgRNA1399	SPV_2061,SPV_0020	tRNA-Asn-2,tRNA-Asn-1	-0.0150618	0.422096	0.971535	0.994736	FALSE	135.987	118.788
sgRNA1400	SPV_2073,SPV_2075	SPV_2073,SPV_2075	0.0378734	0.646041	0.953252	0.993482	FALSE	146.521	162.728
sgRNA1401	SPV_2076	SPV_2076	-0.125608	0.863764	0.88438	0.980538	FALSE	96.6666	87.4568
sgRNA1402	SPV_2084	srf-02	-0.0165697	0.269387	0.950954	0.993482	FALSE	236.473	255.565
sgRNA1403	SPV_2085,SPV_0758,SPV_2236,SPV_1708,SPV_2403,SPV_2404	SPV_2085,SPV_0758,SPV_2236,SPV_1708,SPV_2403,SPV_2404	0.35389	0.680239	0.602894	0.915799	FALSE	79.8852	79.6406
sgRNA1404	SPV_2087	SPV_2087	-0.799413	0.760714	0.293317	0.817735	FALSE	138.09	165.487
sgRNA1405	SPV_2088	SPV_2088	-0.541838	0.473289	0.252277	0.795642	FALSE	76.9071	108.614
sgRNA1406	SPV_2089	SPV_2089	0.285554	0.334633	0.393473	0.837662	FALSE	187.504	150.369
sgRNA1407	SPV_2090	SPV_2090	-0.257844	0.912409	0.777486	0.953021	FALSE	50.6353	50.9086
sgRNA1408	SPV_2091	SPV_2091	-0.228622	0.524144	0.662705	0.929786	FALSE	201.505	225.623
sgRNA1409	SPV_2096,SPV_0105	SPV_2096,SPV_0105	0.0300247	0.466856	0.948721	0.993482	FALSE	205.446	166.61
sgRNA1410	SPV_2100	SPV_2100	-0.0744015	0.416147	0.858105	0.96916	FALSE	89.9409	90.92
sgRNA1411	SPV_2104,SPV_0125	SPV_2104,SPV_0125	-0.0664395	0.336848	0.843641	0.968993	FALSE	203.816	204.221
sgRNA1412	SPV_2110,SPV_2112	SPV_2110,SPV_2112	0.493984	0.815807	0.544837	0.893397	FALSE	96.9673	102.64
sgRNA1413	SPV_2113,SPV_2114	SPV_2113,SPV_2114	-0.203815	0.293073	0.486778	0.874333	FALSE	216.785	227.248
sgRNA1414	SPV_2115,SPV_2116	SPV_2115,SPV_2116	-0.308683	0.430538	0.473393	0.867177	FALSE	122.742	137.001
sgRNA1415	SPV_2116,SPV_2223,SPV_0716	SPV_2116,SPV_2223,SPV_0716	0.499534	0.741915	0.500755	0.881139	FALSE	114.459	113.949
sgRNA1416	SPV_2117,SPV_2118	SPV_2117,SPV_2118	0.365726	0.793761	0.644977	0.927301	FALSE	52.9214	63.5788
sgRNA1417	SPV_2126,SPV_0224	SPV_2126,SPV_0224	0.36064	0.442315	0.414874	0.83893	FALSE	121.359	72.104
sgRNA1418	SPV_2127,SPV_2128	SPV_2127,SPV_2128	0.525445	0.922802	0.569083	0.901197	FALSE	90.0658	82.7802
sgRNA1419	SPV_2130,SPV_2129	ccnB,ccnA	-0.408565	0.487326	0.401816	0.83893	FALSE	101.392	143.633
sgRNA1420	SPV_2133	ccnD	-0.534445	0.445599	0.230378	0.770985	FALSE	138.861	240.607
sgRNA1421	SPV_2143,SPV_2223,SPV_2224,SPV_2135,SPV_2136	SPV_2143,SPV_2223,SPV_2224,SPV_2135,SPV_2136	0.666587	0.414828	0.108077	0.607081	FALSE	196.208	145.038
sgRNA1422	SPV_2137,SPV_2138	SPV_2137,SPV_2138	0.0683463	0.568081	0.904237	0.983057	FALSE	123.292	126.809
sgRNA1423	SPV_2137,SPV_2139	SPV_2137,srf-08	-0.962144	0.48831	0.0487974	0.417706	FALSE	94.9235	117.368
sgRNA1424	SPV_2141	SPV_2141	0.608282	0.860521	0.479643	0.870029	FALSE	72.3093	87.015
sgRNA1425	SPV_2142	SPV_2142	-0.534639	0.534966	0.317606	0.819042	FALSE	168.915	189.911
sgRNA1426	SPV_2144	SPV_2144	-0.202417	0.536247	0.705825	0.935178	FALSE	175.252	147.053
sgRNA1427	SPV_2146,SPV_2147	SPV_2146,SPV_2147	1.34383	0.814763	0.099077	0.596113	FALSE	108.401	45.1742
sgRNA1428	SPV_2158	SPV_2158	-0.51581	0.500677	0.302905	0.819042	FALSE	101.066	103.192
sgRNA1429	SPV_2160,SPV_2162	SPV_2160,SPV_2162	-0.891945	0.668898	0.182383	0.699139	FALSE	130.681	183.18
sgRNA1430	SPV_2164	SPV_2164	0.430105	0.555015	0.438374	0.845021	FALSE	91.6497	75.236
sgRNA1431	SPV_2165	SPV_2165	0.260511	0.841619	0.756914	0.944026	FALSE	162.446	176.489
sgRNA1432	SPV_2166	SPV_2166	3.91225	1.56416	0.012378	0.170112	FALSE	11.0663	0
sgRNA1433	SPV_2168	SPV_2168	-0.012622	0.496185	0.979705	0.994736	FALSE	183.158	189.256
sgRNA1434	SPV_2169	SPV_2169	-0.414354	0.410281	0.31253	0.819042	FALSE	106.61	119.952
sgRNA1435	SPV_2188,SPV_0518	SPV_2188,SPV_0518	-0.130126	0.875934	0.881903	0.979467	FALSE	76.1286	67.4948
sgRNA1436	SPV_2008,SPV_2451,SPV_2189,SPV_0520	SPV_2008,SPV_2451,SPV_2189,SPV_0520	-0.412585	0.623675	0.508267	0.88263	FALSE	183.574	192.365
sgRNA1437	SPV_2192,SPV_0544	SPV_2192,SPV_0544	-0.333206	0.402938	0.408271	0.83893	FALSE	240.322	280.923
sgRNA1438	SPV_2200	srf-11	-0.359074	0.508809	0.480366	0.870029	FALSE	105.865	122.125
sgRNA1439	SPV_2201,SPV_0565	SPV_2201,SPV_0565	-0.442403	0.453384	0.329174	0.819042	FALSE	79.7535	95.6855
sgRNA1440	SPV_2202	SPV_2202	-0.167788	0.407811	0.680754	0.93471	FALSE	145.758	132.206
sgRNA1441	SPV_2203,SPV_2204	SPV_2203,SPV_2204	-0.424548	0.555893	0.445032	0.851416	FALSE	131.105	117.894
sgRNA1442	SPV_2205,SPV_2206	SPV_2205,SPV_2206	0.259882	0.865572	0.763992	0.9474	FALSE	122.765	143.346
sgRNA1443	SPV_2213	SPV_2213	-0.895728	0.747422	0.230752	0.770985	FALSE	98.0957	142.12
sgRNA1444	SPV_2219	SPV_2219	-0.121344	0.309527	0.695036	0.935178	FALSE	176.07	168.49
sgRNA1445	SPV_2226	srf-12	0.0823364	0.364104	0.821097	0.963779	FALSE	222.411	209.679
sgRNA1446	SPV_2227,SPV_0727	SPV_2227,SPV_0727	0.107198	0.593234	0.856603	0.968993	FALSE	102.385	101.595
sgRNA1447	SPV_2239	SPV_2239	-0.52536	0.422034	0.213194	0.754254	FALSE	111.225	155.627
sgRNA1448	SPV_2240,SPV_0791	SPV_2240,SPV_0791	-0.21152	0.453333	0.640795	0.927301	FALSE	176.665	228.223
sgRNA1449	SPV_2242,SPV_0800	SPV_2242,SPV_0800	-0.4078	0.728959	0.57587	0.902425	FALSE	176.947	149.899
sgRNA1450	SPV_2244	SPV_2244	-0.102317	0.253951	0.687022	0.934749	FALSE	246.28	238.094
sgRNA1451	SPV_2250	SPV_2250	0.0865937	0.460531	0.850853	0.968993	FALSE	112.003	96.6436
sgRNA1452	SPV_2259	rpmG1	-0.205933	0.356885	0.563919	0.900946	FALSE	129.213	132.036
sgRNA1453	SPV_2178,SPV_0497,SPV_2260,SPV_0869,SPV_2341,SPV_2343,SPV_2344,SPV_1420,SPV_2358,SPV_0744,SPV_2232	SPV_2178,SPV_0497,SPV_2260,SPV_0869,SPV_2341,SPV_2343,SPV_2344,SPV_1420,SPV_2358,SPV_0744,SPV_2232	1.15439	0.532156	0.0300623	0.308448	FALSE	121.758	90.0087
sgRNA1454	SPV_2266,SPV_1036	dhaM,SPV_1036	0.216335	0.411602	0.59917	0.911226	FALSE	172.71	153.061
sgRNA1455	SPV_2267	SPV_2267	-0.433977	0.581835	0.455742	0.855515	FALSE	145.808	177.812
sgRNA1456	SPV_2278	SPV_2278	-0.163181	0.419132	0.697031	0.935178	FALSE	135.609	152.891
sgRNA1457	SPV_2279,SPV_2281	SPV_2279,SPV_2281	-0.27523	0.499305	0.581479	0.905441	FALSE	122.79	135.652
sgRNA1458	SPV_2282	shp	0.0833134	0.447086	0.852172	0.968993	FALSE	155.804	175.563
sgRNA1459	SPV_2283,SPV_0936	SPV_2283,SPV_0936	0.723806	0.504576	0.151435	0.673142	FALSE	175.735	122.457
sgRNA1460	SPV_2289	SPV_2289	-0.974428	0.669027	0.145258	0.659244	FALSE	70.2558	126.451
sgRNA1461	SPV_2290	SPV_2290	0.795119	0.885666	0.369311	0.832705	FALSE	77.5369	73.8265
sgRNA1462	SPV_2291	srf-16	0.0037	0.600869	0.995087	0.997664	FALSE	89.3845	112.207
sgRNA1463	SPV_2293,SPV_2296	phtF,SPV_2296	-0.774675	0.831293	0.351392	0.832705	FALSE	123.496	155.672
sgRNA1464	SPV_2298	SPV_2298	-0.313796	0.304455	0.30269	0.819042	FALSE	220.598	294.814
sgRNA1465	SPV_2299,SPV_1045	SPV_2299,SPV_1045	-0.311514	0.554339	0.574146	0.901542	FALSE	179.194	189.799
sgRNA1466	SPV_2311	SPV_2311	-0.797399	0.858101	0.352754	0.832705	FALSE	131.242	183.693
sgRNA1467	SPV_2314	SPV_2314	-0.853848	0.570298	0.134343	0.638873	FALSE	157.422	248.486
sgRNA1468	SPV_2319,SPV_1161	SPV_2319,SPV_1161	-0.287606	0.438319	0.511723	0.883327	FALSE	92.4561	104.825
sgRNA1469	SPV_2320,SPV_2321,SPV_2375,SPV_2376	SPV_2320,SPV_2321,SPV_2375,SPV_2376	-0.623569	0.883002	0.480069	0.870029	FALSE	125.19	167.294
sgRNA1470	SPV_2325	SPV_2325	0.228328	0.594173	0.700772	0.935178	FALSE	112.132	99.1549
sgRNA1471	SPV_2332	SPV_2332	-1.26118	0.778579	0.105264	0.60174	FALSE	89.3074	99.9418
sgRNA1472	SPV_2333	SPV_2333	-0.340018	0.457627	0.457481	0.856567	FALSE	163.218	209.535
sgRNA1473	SPV_2337,SPV_1271	SPV_2337,SPV_1271	-0.627479	0.407758	0.12384	0.624623	FALSE	104.585	165.912
sgRNA1474	SPV_2349	SPV_2349	-0.156014	0.307467	0.611862	0.916372	FALSE	191.726	215.811
sgRNA1475	SPV_2351,SPV_2353	msbA,SPV_2353	0.136998	0.543021	0.800818	0.958168	FALSE	127.893	120.543
sgRNA1476	SPV_2362	SPV_2362	-0.266624	0.544835	0.624582	0.921797	FALSE	154.3	132.526
sgRNA1477	SPV_2363	SPV_2363	-0.488872	0.417458	0.241572	0.784977	FALSE	228.041	242.923
sgRNA1478	SPV_2367	SPV_2367	0.194421	0.385225	0.613773	0.916372	FALSE	197.696	226.866
sgRNA1479	SPV_2371,SPV_1455	SPV_2371,SPV_1455	-0.515723	0.387186	0.182867	0.699139	FALSE	261.392	341.841
sgRNA1480	SPV_2372	SPV_2372	0.410454	0.544588	0.451032	0.854167	FALSE	164.165	103.88
sgRNA1481	SPV_2373,SPV_1471	SPV_2373,SPV_1471	0.31741	0.447386	0.478028	0.870029	FALSE	148.173	125.4
sgRNA1482	SPV_2377	SPV_2377	-1.27086	0.838398	0.129564	0.632205	FALSE	152.877	145.373
sgRNA1483	SPV_2381	SPV_2381	0.336069	0.889155	0.705457	0.935178	FALSE	113.272	82.2841
sgRNA1484	SPV_2384	SPV_2384	-0.168301	0.400733	0.674498	0.933209	FALSE	176.446	214.856
sgRNA1485	SPV_2389	SPV_2389	0.460639	0.411185	0.262598	0.801998	FALSE	130.35	120.495
sgRNA1486	SPV_2395	SPV_2395	-0.0390643	0.436701	0.928722	0.992643	FALSE	127.316	123.054
sgRNA1487	SPV_2407	SPV_2407	-0.792737	0.58081	0.17229	0.699139	FALSE	220.881	311.234
sgRNA1488	SPV_2408,SPV_2410	SPV_2408,SPV_2410	0.13618	0.982464	0.889758	0.982441	FALSE	212.078	195.398
sgRNA1489	SPV_2411,SPV_2412	SPV_2411,SPV_2412	-0.249043	0.463565	0.591106	0.906323	FALSE	95.4563	94.7532
sgRNA1490	SPV_2274,SPV_0972,SPV_2304,SPV_2305,SPV_1539,SPV_2386,SPV_2414,SPV_2415,SPV_2083,SPV_0045	SPV_2274,SPV_0972,SPV_2304,SPV_2305,SPV_1539,SPV_2386,SPV_2414,SPV_2415,SPV_2083,SPV_0045	0.231187	0.344242	0.50185	0.881139	FALSE	283.459	247.229
sgRNA1491	SPV_2416,SPV_1734	SPV_2416,SPV_1734	0.41257	0.435251	0.343186	0.82664	FALSE	166.965	181.537
sgRNA1492	SPV_2417	SPV_2417	1.00469	0.892494	0.260286	0.801998	FALSE	64.8032	42.8435
sgRNA1493	SPV_2418	SPV_2418	0.212639	0.549808	0.69894	0.935178	FALSE	71.7468	85.5695
sgRNA1494	SPV_2419	SPV_2419	-0.893336	1.04026	0.390472	0.837386	FALSE	43.058	87.0128
sgRNA1495	SPV_2434	SPV_2434	-0.142217	0.440199	0.746639	0.939012	FALSE	93.673	106.705
sgRNA1496	SPV_2437	SPV_2437	0.210627	0.823558	0.798142	0.958168	FALSE	84.3188	115.434
sgRNA1497	SPV_2446,SPV_1982	SPV_2446,SPV_1982	0.22136	0.444262	0.618298	0.917949	FALSE	108.853	84.3279
sgRNA1498	SPV_2453	SPV_2453	0.0193599	0.487261	0.968307	0.994736	FALSE	77.3072	66.1803
sgRNA1499	SPV_2455	SPV_2455	0.782486	0.893858	0.381355	0.834293	FALSE	47.1628	48.0844

## Sheet: Significant
sgRNA	target_operon_locus_tags	target_operon_names	log2FoldChange	lfcSE	pvalue	padj	significant	norm_FSCMax_median	norm_FSCMiddle_median
sgRNA1019	SPV_0713	SPV_0713	8.45098	0.921723	4.78883e-20	3.58683e-17	TRUE	1055.66	1.25993
sgRNA0455	SPV_1197,SPV_1198,SPV_1199,SPV_1200,SPV_1201	tarQ,tarP,cps23FU,SPV_1200,licD3	8.15189	1.07111	2.72583e-14	1.02082e-11	TRUE	737.228	0.314982
sgRNA0432	SPV_1128	tacF	7.79744	1.47989	1.37217e-07	1.37034e-05	TRUE	1307.21	11.9693
sgRNA0036	SPV_0099	aatA	7.67255	1.75231	1.19475e-05	0.000542344	TRUE	182.335	0
sgRNA0095	SPV_0248	glmS	7.18114	1.61885	9.16691e-06	0.000457734	TRUE	35.2452	0
sgRNA0035	SPV_0098	SPV_0098	7.1169	1.28817	3.29818e-08	3.80052e-06	TRUE	138.01	0
sgRNA1236	SPV_1475	ylmH	7.07439	1.41182	5.4195e-07	4.51023e-05	TRUE	46.1643	0
sgRNA0780	SPV_0305	ftsL	6.55546	1.38574	2.23812e-06	0.000167635	TRUE	20.1327	0
sgRNA0796	SPV_0847	infC	6.2893	1.26259	6.31657e-07	4.98012e-05	TRUE	73.244	0.943549
sgRNA1307	SPV_1697,SPV_1811	tRNA-Asp-1,tRNA-Asp-2	5.73424	1.45744	8.33863e-05	0.00297411	TRUE	36.9084	0
sgRNA0132	SPV_0339	gpsB	5.27102	0.910377	7.04145e-09	9.58918e-07	TRUE	130.326	6.11082
sgRNA0757	SPV_2043	pcsB	5.11753	1.56621	0.00108516	0.0253995	TRUE	24.1051	0
sgRNA0824	SPV_1483	murF	5.05428	1.20229	2.62381e-05	0.00112299	TRUE	118.358	11.3394
sgRNA0813	SPV_1129	licD1	4.91642	0.761504	1.0737e-10	2.0105e-08	TRUE	549.239	48.7939
sgRNA0512	SPV_1370	rpsF	4.89846	1.24273	8.09103e-05	0.00295619	TRUE	47.4435	1.57491
sgRNA1342	SPV_1682,SPV_1683,SPV_1684,SPV_1685,SPV_1686,SPV_1885	tRNA-Ser-2,tRNA-Ile-1,tRNA-Gly-1,tRNA-Phe-1,tRNA-fMet-1,tRNA-fMet-2	4.83576	1.32757	0.000269941	0.00825249	TRUE	44.9314	1.41532
sgRNA0797	SPV_0848	rpmI	4.79189	1.45614	0.000998991	0.0245326	TRUE	32.7598	0.629964
sgRNA0567	SPV_1484	ddl	4.79103	1.53806	0.00183955	0.0393664	TRUE	35.7426	0
sgRNA0372	SPV_0953,SPV_0952	ppc,ftsW	4.76469	0.888619	8.23498e-08	8.81143e-06	TRUE	220.946	6.46559
sgRNA1058	SPV_0849	rplT	4.7463	1.3378	0.000388412	0.0112163	TRUE	56.7433	2.83484
sgRNA0611	SPV_1619,SPV_1620	aatB,SPV_1620	4.70787	1.03152	5.0183e-06	0.000300696	TRUE	129.214	6.76443
sgRNA0395	SPV_1039,SPV_1040	ptsI,ptsH	4.62552	1.13062	4.29299e-05	0.00160772	TRUE	25.0654	1.88989
sgRNA0522	SPV_1390,SPV_1391,SPV_1392	glmM,SPV_1391,disA	4.52859	1.08909	3.20875e-05	0.00129911	TRUE	120.442	5.23024
sgRNA0003	SPV_0007,SPV_0008	SPV_0007,divIC	4.4459	0.707589	3.31736e-10	5.52156e-08	TRUE	466.817	26.7519
sgRNA0628	SPV_1672	tacL	4.37528	0.501917	2.85294e-18	1.42457e-15	TRUE	1473.72	80.0739
sgRNA0269	SPV_0708	SPV_0708	4.36568	0.929724	2.65728e-06	0.000189552	TRUE	84.7281	8.63239
sgRNA0111	SPV_0274,SPV_0275	rplM,rpsI	4.35773	1.2285	0.00038935	0.0112163	TRUE	72.9153	4.27992
sgRNA0583	SPV_1536,SPV_1537	mvaA,mvaS	4.32422	0.42864	6.22911e-24	9.33121e-21	TRUE	1666.01	88.4589
sgRNA0785	SPV_0600	divIB	4.32375	0.59936	5.43577e-13	1.35713e-10	TRUE	430.866	16.2794
sgRNA1362	SPV_1931	SPV_1931	4.23778	1.29464	0.00106292	0.0252738	TRUE	59.6372	5.00131
sgRNA0666	SPV_1791	SPV_1791	4.17715	1.00809	3.41873e-05	0.0013477	TRUE	107.085	6.23784
sgRNA0573	SPV_1512	secA	4.09276	0.6898	2.96973e-09	4.44865e-07	TRUE	242.714	19.8299
sgRNA0228	SPV_0598,SPV_0599	murD,murG	4.08679	0.977085	2.88155e-05	0.00119904	TRUE	221.755	16.3576
sgRNA0209	SPV_0550,SPV_0551	rplK,rplA	4.03793	1.28955	0.0017405	0.0383422	TRUE	23.493	3.77978
sgRNA0414	SPV_1083,SPV_1084,SPV_1085	vicX,vicK,vicR	3.83361	1.10935	0.000548794	0.015224	TRUE	120.819	8.91093
sgRNA0323	SPV_2258	srf-14	3.81131	1.2191	0.00177005	0.0384281	TRUE	34.9042	1.81538
sgRNA0135	SPV_0346,SPV_0347,SPV_0348,SPV_0349	mvk,mvaD,mvaK2,fni	3.78465	0.858872	1.05034e-05	0.000491693	TRUE	1865.48	74.7086
sgRNA0673	SPV_2423	rpmG2	3.68589	0.798011	3.85883e-06	0.000257296	TRUE	208.994	18.0996
sgRNA0071	SPV_0178	spxA2	3.62114	0.820724	1.02358e-05	0.000491693	TRUE	299.466	27.3109
sgRNA0046	SPV_0131	SPV_0131	3.45244	0.748259	3.95047e-06	0.000257296	TRUE	350.791	31.2144
sgRNA0409	SPV_1077	gyrA	3.33369	0.896459	0.000200227	0.0063817	TRUE	88.5882	20.2989
sgRNA0838	SPV_1820	secE	2.9726	0.759649	9.11116e-05	0.00310194	TRUE	172.104	23.7764
sgRNA0931	SPV_0341	rlmL	2.93447	0.680717	1.62623e-05	0.000716499	TRUE	248.794	58.4861
sgRNA0872	SPV_0010	SPV_0010	2.89002	0.511472	1.60087e-08	1.99841e-06	TRUE	322.108	57.0622
sgRNA0932	SPV_0342	mapZ	2.79392	0.537332	1.99695e-07	1.75966e-05	TRUE	236.723	38.7277
sgRNA0081	SPV_0201,SPV_0202,SPV_0203,SPV_0204,SPV_0205,SPV_0206,SPV_0207,SPV_0208,SPV_0209,SPV_0210,SPV_0211,SPV_0212,SPV_0213	rpmC,rpsQ,rplN,rplX,rplE,rpsN,rpsH,rplF,rplR,rpsE,rpmD,rplO,secY	2.7214	0.803155	0.000703067	0.0181585	TRUE	85.1603	21.9787
sgRNA0431	SPV_1123,SPV_1124,SPV_1125,SPV_1126,SPV_1127	licC,licB,licA,tarJ,tarI	2.70025	0.590751	4.8568e-06	0.000300696	TRUE	928.253	97.6948
sgRNA0943	SPV_0418	SPV_0418	2.64604	0.76745	0.000565099	0.0153912	TRUE	308.992	53.8872
sgRNA0147	SPV_0379,SPV_0380,SPV_0381	fabT,fabH,acpP	2.585	0.368242	2.22112e-12	4.7532e-10	TRUE	514.678	64.4766
sgRNA0535	SPV_1416,SPV_1417	murT,gatD	2.57104	0.77278	0.000877848	0.0222884	TRUE	597.918	105.252
sgRNA0810	SPV_0991	rpmA	2.55088	0.569222	7.41748e-06	0.000411533	TRUE	71.1459	27.3182
sgRNA0792	SPV_0768	cozE	2.5474	0.73122	0.000494402	0.0139738	TRUE	292.798	58.7294
sgRNA0270	SPV_0710	ezrA	2.29933	0.585707	8.64675e-05	0.00301229	TRUE	163.574	45.5847
sgRNA0827	SPV_1509	acpS	2.21595	0.576598	0.000121466	0.00395556	TRUE	158.07	50.0484
sgRNA1074	SPV_0911	SPV_0911	2.21292	0.30534	4.24854e-13	1.27286e-10	TRUE	500.767	90.7624
sgRNA0160	SPV_0417	uppP	2.19829	0.420767	1.74633e-07	1.635e-05	TRUE	977.806	183.827
sgRNA0244	SPV_2217	SPV_2217	2.08155	0.462533	6.7847e-06	0.000390903	TRUE	359.179	94.1227
sgRNA0568	SPV_1486	pbp2b	2.03454	0.457255	8.60841e-06	0.000444669	TRUE	372.271	95.4897
sgRNA0778	SPV_0271	sulC	2.01399	0.625746	0.00128846	0.0296941	TRUE	122.398	38.2473
sgRNA0456	SPV_1202,SPV_1203,SPV_1204,SPV_1205	psr,pheA,aroK,aroA	1.96528	0.53813	0.000260145	0.00811869	TRUE	204.006	65.1335
sgRNA1142	SPV_1130	licD2	1.77358	0.498964	0.000378664	0.0112163	TRUE	352.506	153.379
sgRNA0842	SPV_2044	mreD	1.69673	0.379999	8.00332e-06	0.000428177	TRUE	355.346	114.236
sgRNA1258	SPV_1511	aroG	1.69517	0.513366	0.000959774	0.0239624	TRUE	100.8	32.7735
sgRNA0788	SPV_0706	rodA	1.61567	0.393878	4.09653e-05	0.00157349	TRUE	254.436	86.6173
sgRNA0011	SPV_0030,SPV_2079	SPV_0030,prsW	1.58993	0.495909	0.00134553	0.0305394	TRUE	389.36	125.132
sgRNA0606	SPV_1594,SPV_1595	SPV_1594,SPV_1595	1.54455	0.499468	0.00198548	0.0415859	TRUE	115.75	28.7948
sgRNA0798	SPV_0859	coaE	1.48982	0.436756	0.000647007	0.0170038	TRUE	288.879	79.9073
sgRNA0772	SPV_0038	polA	1.36345	0.427028	0.00140859	0.0314935	TRUE	94.9133	44.3226
sgRNA0823	SPV_2374,SPV_1474	SPV_2374,divIVA	1.2002	0.365499	0.00102447	0.0247526	TRUE	221.365	105.792
sgRNA0683	SPV_1838,SPV_1839	yajC,ulaH	1.0033	0.325081	0.00202655	0.0415859	TRUE	184.254	90.2426
sgRNA1067	SPV_0876	SPV_0876	-1.35691	0.395711	0.000605694	0.0162023	TRUE	67.9555	204.849
sgRNA0128	SPV_0321,SPV_0322,SPV_0323,SPV_0324,SPV_0325,SPV_0326,SPV_0327,SPV_0328,SPV_0329,SPV_0330	cps2F,cps2G,cps2H,cps2I,cps2J,cps2K,cps2P,cps2L,cps2M,cps2N	-1.59402	0.515818	0.00199965	0.0415859	TRUE	269.135	1159.31
sgRNA0660	SPV_1776	purR	-1.74062	0.451607	0.000116072	0.00386391	TRUE	62.8827	136.537

## Sheet: ColumLegends
sheet: ReadCounts
This sheet contains read counts for all sgRNAs found in this screen
ColumnHeaders	Explanation
Gene_ID	Lists the sgRNA in question
FSCMax1	Read counts in the fraction of the population with highest FSC values (FSCMax), repeat 1
FSCMax2	Read counts in the fraction of the population with highest FSC values (FSCMax), repeat 2
FSCMax3	Read counts in the fraction of the population with highest FSC values (FSCMax), repeat 3
FSCMax4	Read counts in the fraction of the population with highest FSC values (FSCMax), repeat 4
FSCMax5	Read counts in the fraction of the population with highest FSC values (FSCMax), repeat 5
FSCMax6	Read counts in the fraction of the population with highest FSC values (FSCMax), repeat 6
FSCMiddle1	Read counts in the fraction of the population with intermediate FSC values (FSCMiddle), repeat 1
FSCMiddle2	Read counts in the fraction of the population with intermediate FSC values (FSCMiddle), repeat 2
FSCMiddle3	Read counts in the fraction of the population with intermediate FSC values (FSCMiddle), repeat 3
FSCMiddle4	Read counts in the fraction of the population with intermediate FSC values (FSCMiddle), repeat 4
FSCMiddle5	Read counts in the fraction of the population with intermediate FSC values (FSCMiddle), repeat 5
FSCMiddle6	Read counts in the fraction of the population with intermediate FSC values (FSCMiddle), repeat 6
sheet: FSCMax_vs_FSCMiddle
This sheet contains the results of the DESeq2 analysis where the FSCMax population is compared to the FSCMiddle population
ColumnHeaders	Explanation
sgRNA	Lists the sgRNA in question
target_operon_locus_tags	Locus tags of the genes that are part of the operon that is targeted by the sgRNA
target_operon_names	Names of the genes that are part of the operon that is targeted by the sgRNA
log2FoldChange	Log2FoldChange of the read counts found in the FSCMax population compared to FSCMiddle
lfcSE	The standard error on the Log2FoldChange
pvalue	The raw p value
padj	The FDR adjusted p value
significant	Indicates whether or not the sgRNA was found to be significantly enriched/depleted in FSCMax versus FSCMiddle
norm_FSCMax_median	The median of the normalized read counts in the FSCMax population
norm_FSCMiddle_median	The median of the normalized read counts in the FSCMiddle population
sheet: Significant
This sheet contains the results of the DESeq2 analysis where the FSCMax population is compared to the FSCMiddle population for all significantly enriched/depleted sgRNAs (p < 0,05)
ColumnHeaders	Explanation
sgRNA	Lists the sgRNA in question
target_operon_locus_tags	Locus tags of the genes that are part of the operon that is targeted by the sgRNA
target_operon_names	Names of the genes that are part of the operon that is targeted by the sgRNA
log2FoldChange	Log2FoldChange of the read counts found in the FSCMax population compared to FSCMiddle
lfcSE	The standard error on the Log2FoldChange
pvalue	The raw p value
padj	The FDR adjusted p value
significant	Indicates whether or not the sgRNA was found to be significantly enriched/depleted in FSCMax versus FSCMiddle
norm_FSCMax_median	The median of the normalized read counts in the FSCMax population
norm_FSCMiddle_median	The median of the normalized read counts in the FSCMiddle population
