# Supplementary material for: Amoxicillin-resistant Streptococcus pneumoniae can be resensitized by targeting the mevalonate pathway as indicated by sCRilecs-seq
Source: eLife. 2022 Jun 24;11:e75607. doi: 10.7554/eLife.75607 (PMC9363119; doi:10.7554/eLife.75607)
Supplement: Supplementary file 2. [file elife-75607-supp2.xlsx]

## Sheet: Sheet1
Analysis Type:	PANTHER Overrepresentation Test (Released 20220202)
Annotation Version and Release Date:	GO Ontology database DOI: 10.5281/zenodo.5725227 Released 2020-11-01
Analyzed List:	upload_1 (Streptococcus pneumoniae)
Reference List:	Streptococcus pneumoniae (all genes in database)
Test Type:	FISHER
Correction:	FDR
GO biological process complete	Streptococcus pneumoniae - REFLIST (2030)	Input list	Expected	Over/under	Fold Enrichment	Raw P-value	FDR
isoprenoid metabolic process (GO:0006720)	7	5	.37	+	13.43	1.79E-04	6.60E-03
isoprenoid biosynthetic process (GO:0008299)	7	5	.37	+	13.43	1.79E-04	6.45E-03
regulation of cell shape (GO:0008360)	29	13	1.54	+	8.43	5.07E-08	1.03E-05
regulation of cell morphogenesis (GO:0022604)	29	13	1.54	+	8.43	5.07E-08	9.15E-06
regulation of anatomical structure morphogenesis (GO:0022603)	29	13	1.54	+	8.43	5.07E-08	8.24E-06
regulation of developmental process (GO:0050793)	31	13	1.65	+	7.88	9.47E-08	1.28E-05
cell wall organization (GO:0071555)	28	10	1.49	+	6.71	1.03E-05	7.24E-04
cell division (GO:0051301)	34	12	1.81	+	6.63	1.38E-06	1.24E-04
external encapsulating structure organization (GO:0045229)	29	10	1.54	+	6.48	1.32E-05	8.26E-04
glycosaminoglycan biosynthetic process (GO:0006024)	27	9	1.44	+	6.27	4.59E-05	2.41E-03
aminoglycan biosynthetic process (GO:0006023)	27	9	1.44	+	6.27	4.59E-05	2.33E-03
peptidoglycan biosynthetic process (GO:0009252)	27	9	1.44	+	6.27	4.59E-05	2.26E-03
cellular component macromolecule biosynthetic process (GO:0070589)	34	11	1.81	+	6.08	7.85E-06	6.37E-04
cell wall macromolecule biosynthetic process (GO:0044038)	34	11	1.81	+	6.08	7.85E-06	6.07E-04
peptidoglycan-based cell wall biogenesis (GO:0009273)	35	11	1.86	+	5.91	9.89E-06	7.30E-04
cell wall biogenesis (GO:0042546)	36	11	1.92	+	5.74	1.24E-05	8.37E-04
cell wall macromolecule metabolic process (GO:0044036)	36	11	1.92	+	5.74	1.24E-05	8.03E-04
peptidoglycan metabolic process (GO:0000270)	30	9	1.60	+	5.64	9.10E-05	4.10E-03
aminoglycan metabolic process (GO:0006022)	30	9	1.60	+	5.64	9.10E-05	3.99E-03
glycosaminoglycan metabolic process (GO:0030203)	30	9	1.60	+	5.64	9.10E-05	3.89E-03
cell cycle (GO:0007049)	31	9	1.65	+	5.46	1.12E-04	4.57E-03
cell wall organization or biogenesis (GO:0071554)	41	11	2.18	+	5.04	3.46E-05	1.87E-03
cellular lipid metabolic process (GO:0044255)	36	9	1.92	+	4.70	2.95E-04	9.97E-03
lipid biosynthetic process (GO:0008610)	33	8	1.76	+	4.56	7.74E-04	2.33E-02
lipid metabolic process (GO:0006629)	39	9	2.07	+	4.34	4.91E-04	1.50E-02
regulation of biological quality (GO:0065008)	58	13	3.09	+	4.21	3.34E-05	1.87E-03
translation (GO:0006412)	102	22	5.43	+	4.05	7.56E-08	1.12E-05
peptide biosynthetic process (GO:0043043)	105	22	5.59	+	3.94	1.19E-07	1.48E-05
cellular amide metabolic process (GO:0043603)	133	26	7.08	+	3.67	2.30E-08	6.22E-06
peptide metabolic process (GO:0006518)	113	22	6.01	+	3.66	3.70E-07	4.29E-05
amide biosynthetic process (GO:0043604)	114	22	6.07	+	3.63	4.23E-07	4.58E-05
macromolecule biosynthetic process (GO:0009059)	204	38	10.85	+	3.50	1.30E-11	2.12E-08
cellular macromolecule biosynthetic process (GO:0034645)	199	37	10.59	+	3.49	2.86E-11	1.55E-08
cellular component organization (GO:0016043)	89	15	4.73	+	3.17	1.48E-04	5.59E-03
cellular component biogenesis (GO:0044085)	95	16	5.05	+	3.17	8.75E-05	4.06E-03
cellular protein metabolic process (GO:0044267)	154	25	8.19	+	3.05	1.12E-06	1.14E-04
cellular component organization or biogenesis (GO:0071840)	129	18	6.86	+	2.62	2.69E-04	9.29E-03
organonitrogen compound biosynthetic process (GO:1901566)	290	39	15.43	+	2.53	5.05E-08	1.17E-05
biosynthetic process (GO:0009058)	411	54	21.87	+	2.47	2.75E-11	2.23E-08
protein metabolic process (GO:0019538)	208	27	11.07	+	2.44	2.12E-05	1.27E-03
cellular biosynthetic process (GO:0044249)	395	51	21.01	+	2.43	4.33E-10	1.41E-07
organic substance biosynthetic process (GO:1901576)	403	52	21.44	+	2.43	2.50E-10	1.02E-07
gene expression (GO:0010467)	195	24	10.37	+	2.31	2.21E-04	7.81E-03
cellular macromolecule metabolic process (GO:0044260)	352	41	18.73	+	2.19	1.18E-06	1.13E-04
cellular nitrogen compound biosynthetic process (GO:0044271)	259	29	13.78	+	2.10	1.29E-04	4.98E-03
organonitrogen compound metabolic process (GO:1901564)	444	47	23.62	+	1.99	1.51E-06	1.29E-04
macromolecule metabolic process (GO:0043170)	448	43	23.83	+	1.80	5.40E-05	2.58E-03
cellular metabolic process (GO:0044237)	724	61	38.52	+	1.58	2.14E-05	1.24E-03
nitrogen compound metabolic process (GO:0006807)	633	52	33.68	+	1.54	4.24E-04	1.32E-02
metabolic process (GO:0008152)	834	65	44.37	+	1.46	1.25E-04	4.95E-03
organic substance metabolic process (GO:0071704)	773	60	41.13	+	1.46	3.67E-04	1.17E-02
cellular process (GO:0009987)	1016	75	54.05	+	1.39	1.00E-04	4.16E-03
biological_process (GO:0008150)	1212	83	64.48	+	1.29	3.61E-04	1.17E-02
Unclassified (UNCLASSIFIED)	818	25	43.52	-	.57	3.61E-04	1.20E-02
