# Supplementary material for: Amoxicillin-resistant Streptococcus pneumoniae can be resensitized by targeting the mevalonate pathway as indicated by sCRilecs-seq
Source: eLife. 2022 Jun 24;11:e75607. doi: 10.7554/eLife.75607 (PMC9363119; doi:10.7554/eLife.75607)
Supplement: Supplementary file 3. [file elife-75607-supp3.xlsx]

## Sheet: ReadCounts
Gene_ID	DmevFSCMax1	DmevFSCMax2	DmevFSCMax3	DmevFSCMax4	DmevFSCMax5	DmevFSCMax6	DmevFSCMiddle2	DmevFSCMiddle3	DmevFSCMiddle4	DmevFSCMiddle5	DmevFSCMiddle6	DmevFSCMin1	DmevFSCMin2	DmevFSCMin3	DmevFSCMin4	DmevFSCMin5	DmevFSCMin6
sgRNA0001	26	20	21	21	26	26	140	120	168	112	97	356	314	427	364	375	353
sgRNA0002	553	396	591	405	396	323	191	244	184	107	187	80	88	90	94	136	109
sgRNA0003	115	92	67	44	50	85	17	9	12	5	8	24	21	5	14	13	24
sgRNA0004	44	45	39	38	30	43	208	198	346	204	177	547	579	624	968	973	678
sgRNA0005	353	327	318	347	169	269	255	216	260	117	217	159	86	64	132	119	119
sgRNA0006	508	427	421	557	432	423	506	490	496	270	390	263	376	311	333	234	292
sgRNA0007	392	391	331	372	246	333	256	239	201	130	191	121	101	154	118	96	118
sgRNA0008	362	198	264	324	306	289	337	316	289	210	235	167	265	145	169	132	218
sgRNA0009	167	152	136	204	249	147	577	519	643	414	460	491	623	608	493	472	528
sgRNA0010	864	681	888	865	918	807	807	681	680	480	737	618	565	487	342	471	491
sgRNA0011	436	263	322	208	145	182	375	375	421	292	314	221	250	199	261	309	216
sgRNA0012	4	11	9	4	4	5	96	80	92	57	37	349	243	329	381	488	341
sgRNA0013	686	567	587	714	637	570	603	596	520	370	483	474	371	396	241	320	390
sgRNA0014	372	288	401	414	358	394	402	322	363	215	278	240	264	297	294	196	245
sgRNA0015	479	354	529	510	494	393	466	442	532	333	463	325	255	328	305	212	248
sgRNA0016	548	424	516	520	462	436	517	472	510	334	321	293	332	267	329	257	296
sgRNA0017	594	461	583	593	613	455	522	585	454	300	505	345	377	330	387	251	333
sgRNA0018	387	320	386	403	378	324	401	416	335	204	276	311	292	312	180	181	233
sgRNA0019	597	421	517	552	556	461	576	475	536	322	479	344	299	351	336	299	310
sgRNA0020	156	126	166	116	138	131	392	384	490	357	359	577	571	662	615	558	539
sgRNA0021	128	86	96	147	136	102	315	306	346	228	213	313	338	342	263	276	272
sgRNA0022	375	275	361	392	418	339	514	414	532	288	332	455	480	479	503	516	461
sgRNA0023	457	322	460	561	410	397	431	418	415	271	316	345	361	217	306	236	314
sgRNA0024	480	382	434	436	562	419	518	421	389	262	333	344	379	238	305	207	283
sgRNA0025	370	257	344	387	324	341	339	327	291	220	252	220	264	212	294	158	250
sgRNA0026	199	145	175	216	174	142	192	175	183	92	82	120	108	135	104	98	109
sgRNA0027	607	488	549	790	653	510	607	490	544	399	504	436	428	351	389	340	412
sgRNA0028	346	252	311	300	378	300	413	316	301	263	276	240	251	265	281	177	200
sgRNA0029	629	416	477	545	567	567	541	494	574	378	476	338	423	313	344	275	344
sgRNA0030	44	24	45	46	23	36	127	62	182	113	107	385	210	251	594	731	480
sgRNA0031	410	275	395	456	410	375	423	336	344	256	296	267	242	251	189	241	267
sgRNA0032	428	357	322	356	389	337	395	455	346	230	283	336	265	304	165	230	238
sgRNA0033	676	501	654	632	701	634	539	638	660	385	514	452	486	440	525	321	461
sgRNA0034	316	259	368	329	376	287	304	456	312	172	310	212	231	279	193	192	197
sgRNA0035	175	154	155	330	322	251	137	130	240	184	191	30	28	27	112	130	52
sgRNA0036	121	81	58	174	154	109	84	76	127	96	65	25	39	25	50	73	42
sgRNA0037	388	267	381	345	367	247	322	325	290	210	282	196	202	159	154	215	171
sgRNA0038	532	405	478	557	481	396	450	386	380	261	358	265	298	237	224	254	235
sgRNA0039	562	492	583	618	547	587	558	578	559	434	495	437	389	348	348	299	398
sgRNA0040	291	246	339	292	332	213	333	340	258	122	188	226	234	252	153	210	240
sgRNA0041	362	303	330	305	310	312	373	322	323	196	249	221	238	216	213	202	219
sgRNA0042	427	359	464	486	462	369	613	561	539	364	397	537	578	652	521	538	543
sgRNA0043	627	464	591	631	582	506	603	515	493	263	500	435	296	388	328	299	362
sgRNA0044	28	22	22	43	46	25	113	84	188	146	112	472	293	405	740	949	460
sgRNA0045	319	230	319	221	299	296	495	407	402	218	261	317	277	276	257	224	290
sgRNA0046	942	674	641	883	595	565	170	139	183	117	208	87	68	73	65	86	53
sgRNA0047	506	371	462	510	487	397	572	531	438	354	327	394	365	347	326	315	277
sgRNA0048	587	415	459	580	552	422	438	470	482	331	360	394	353	292	321	243	298
sgRNA0049	121	196	150	332	394	311	672	624	871	563	631	1828	1443	1916	1876	1816	1523
sgRNA0050	280	226	236	222	246	250	231	250	216	124	158	151	185	175	186	152	185
sgRNA0051	400	304	411	453	351	316	388	344	373	173	281	257	299	245	255	166	189
sgRNA0052	401	352	431	427	355	310	339	407	358	268	277	232	249	242	264	194	228
sgRNA0053	313	242	286	256	281	258	307	231	241	177	210	169	241	178	172	154	166
sgRNA0054	508	409	506	562	538	495	551	473	521	334	392	335	409	340	334	263	319
sgRNA0055	173	137	167	147	170	161	176	164	137	113	113	134	122	113	103	120	114
sgRNA0056	698	440	635	677	555	504	688	641	593	373	503	442	623	441	460	379	463
sgRNA0057	370	250	328	404	334	331	448	445	401	231	287	314	340	289	249	220	291
sgRNA0058	270	204	263	336	316	316	620	507	489	296	349	545	552	388	387	343	350
sgRNA0059	754	361	655	692	662	437	710	576	578	166	494	457	448	421	479	340	417
sgRNA0060	395	296	327	380	323	361	343	329	325	237	217	278	257	255	230	250	207
sgRNA0061	345	264	351	384	364	282	348	328	311	158	235	175	226	186	185	201	261
sgRNA0062	406	305	371	434	360	307	328	422	321	214	263	200	277	209	193	189	230
sgRNA0063	404	277	319	340	385	306	352	345	403	270	358	255	350	268	296	191	282
sgRNA0064	971	692	843	1047	888	766	914	831	855	624	795	592	575	610	629	502	613
sgRNA0065	610	410	657	673	676	506	687	549	554	350	398	484	384	349	454	273	342
sgRNA0066	458	343	482	596	406	374	401	375	362	263	338	234	296	281	202	255	285
sgRNA0067	407	333	372	378	379	314	331	339	389	198	218	264	283	228	206	222	230
sgRNA0068	303	246	333	286	331	268	267	248	331	231	253	214	231	168	141	200	157
sgRNA0069	214	152	226	147	99	164	365	284	221	157	233	278	197	254	224	254	200
sgRNA0070	164	114	155	171	130	140	144	140	134	77	105	102	155	83	121	52	89
sgRNA0071	332	235	238	242	346	236	418	415	545	475	482	567	443	443	413	495	441
sgRNA0072	166	131	153	121	275	190	354	359	335	237	244	326	333	360	397	276	282
sgRNA0073	335	287	374	313	373	270	411	383	347	244	310	310	286	227	206	292	287
sgRNA0074	403	359	346	432	474	401	478	412	559	362	410	447	516	511	427	574	374
sgRNA0075	306	210	244	310	273	253	388	306	317	214	216	274	344	278	362	234	227
sgRNA0076	729	541	691	839	811	679	824	693	898	623	666	1003	919	817	817	868	717
sgRNA0077	555	452	581	745	673	505	528	501	566	310	442	351	297	401	377	353	376
sgRNA0078	547	420	418	625	502	538	546	464	453	334	394	357	393	322	262	265	344
sgRNA0079	32	26	27	52	38	42	109	67	169	119	76	335	232	268	822	928	399
sgRNA0080	432	289	405	518	360	373	441	417	469	284	339	518	523	487	396	429	430
sgRNA0081	42	44	32	90	43	49	165	132	306	143	144	445	264	333	1054	1125	584
sgRNA0082	26	14	24	30	34	13	82	82	172	133	115	252	109	193	549	696	247
sgRNA0083	441	303	444	405	431	320	458	385	390	227	294	293	305	264	202	183	252
sgRNA0084	589	411	536	590	478	428	561	421	393	227	291	313	363	230	270	221	290
sgRNA0085	355	231	404	311	300	265	344	278	234	190	210	221	181	171	190	131	170
sgRNA0086	320	254	317	300	301	304	285	239	272	141	224	233	168	208	174	159	186
sgRNA0087	3	3	1	6	6	4	11	14	22	19	8	98	64	94	312	347	144
sgRNA0088	366	224	351	336	318	281	333	272	307	186	232	238	273	206	221	169	201
sgRNA0089	424	368	432	419	414	404	387	382	345	226	290	249	267	203	186	196	232
sgRNA0090	825	557	694	699	692	642	690	718	744	341	521	489	525	459	435	429	355
sgRNA0091	366	255	284	332	306	334	360	294	294	201	219	228	230	245	225	146	196
sgRNA0092	518	317	453	436	501	409	471	465	409	262	341	311	339	334	465	293	297
sgRNA0093	25	9	18	18	18	23	105	58	228	92	95	591	468	509	1305	1561	841
sgRNA0094	385	297	408	485	335	325	384	392	302	135	282	226	256	218	195	207	240
sgRNA0095	60	36	23	27	21	17	83	64	121	102	93	30	45	42	55	81	51
sgRNA0096	984	708	955	859	896	817	869	808	785	514	710	559	545	577	436	495	473
sgRNA0097	275	269	280	379	252	274	344	332	303	181	266	170	259	231	235	167	190
sgRNA0098	32	17	22	35	34	23	82	42	123	68	59	169	154	147	355	464	256
sgRNA0099	39	28	37	67	58	31	67	87	172	93	111	231	165	182	282	350	167
sgRNA0100	79	56	66	71	106	90	187	165	168	58	104	251	175	235	191	187	199
sgRNA0101	313	218	309	323	299	234	381	352	336	264	228	237	260	186	207	206	232
sgRNA0102	761	563	877	837	737	560	801	666	659	416	667	560	513	453	391	422	364
sgRNA0103	516	398	452	506	502	454	484	381	395	312	409	391	343	306	283	277	311
sgRNA0104	107	109	72	247	154	106	308	279	455	280	248	555	587	753	435	367	606
sgRNA0105	321	313	395	292	398	320	333	319	330	225	289	284	228	239	133	230	218
sgRNA0106	437	269	385	376	426	368	424	318	385	216	283	231	235	177	311	192	241
sgRNA0107	521	387	528	578	482	500	486	456	432	241	358	301	335	334	353	253	295
sgRNA0108	408	305	463	455	416	349	441	389	414	212	293	299	335	263	236	169	241
sgRNA0109	110	90	75	157	160	144	214	214	184	155	176	280	229	255	170	265	222
sgRNA0110	419	245	293	382	380	323	349	312	318	183	275	265	255	237	258	234	226
sgRNA0111	49	32	20	39	19	37	148	101	284	141	160	478	348	404	680	981	507
sgRNA0112	224	219	235	254	246	209	309	252	231	167	149	160	202	155	148	136	136
sgRNA0113	315	232	361	264	241	247	258	241	292	130	182	166	174	168	143	146	169
sgRNA0114	152	98	174	187	191	149	207	130	153	131	98	121	128	100	98	128	96
sgRNA0115	174	128	159	213	122	122	171	171	196	82	109	191	114	118	144	94	111
sgRNA0116	365	277	396	516	412	345	458	385	417	231	262	292	302	264	298	212	283
sgRNA0117	328	278	292	381	355	235	287	313	296	143	230	239	190	215	225	213	188
sgRNA0118	551	419	568	653	583	543	504	497	486	350	411	385	401	375	363	275	291
sgRNA0119	583	423	551	490	549	470	581	552	617	443	447	477	458	428	405	350	359
sgRNA0120	615	584	603	836	632	597	635	576	748	326	482	554	471	374	393	312	385
sgRNA0121	0	0	0	0	0	1	3	0	2	1	0	6	16	0	31	15	19
sgRNA0122	9	6	4	3	5	2	9	11	9	3	3	11	8	23	17	5	13
sgRNA0123	645	496	675	725	631	561	569	468	549	308	495	317	316	348	331	287	283
sgRNA0124	334	285	336	387	260	328	333	315	291	177	272	207	202	204	201	134	210
sgRNA0125	586	375	534	527	532	433	512	463	459	284	313	490	339	358	322	262	372
sgRNA0126	416	303	422	449	392	384	374	408	346	253	303	289	281	249	280	232	234
sgRNA0127	145	160	156	123	99	110	120	77	62	39	28	49	67	51	68	54	31
sgRNA0128	515	527	495	538	310	405	361	298	264	144	283	178	140	132	133	90	117
sgRNA0129	781	526	679	685	783	643	689	654	682	437	520	517	420	496	458	346	348
sgRNA0130	21	23	15	22	19	26	241	187	257	144	123	506	555	699	741	637	560
sgRNA0131	221	145	202	225	157	160	250	181	226	165	129	177	164	159	150	135	126
sgRNA0132	89	69	44	97	44	43	33	25	25	35	25	21	21	25	41	38	15
sgRNA0133	148	133	102	207	116	98	396	265	583	387	406	906	658	909	883	1459	931
sgRNA0134	0	3	2	2	1	9	37	27	96	38	67	182	121	122	426	442	251
sgRNA0135	153	143	64	87	66	65	205	237	231	166	169	150	99	124	131	174	126
sgRNA0136	506	455	598	526	526	466	480	494	486	298	423	336	349	331	405	277	334
sgRNA0137	444	409	470	542	493	399	427	398	354	246	418	345	260	231	280	212	254
sgRNA0138	155	108	111	162	219	158	254	265	281	199	224	282	265	283	351	321	216
sgRNA0139	90	85	87	169	109	111	422	301	503	319	334	696	469	644	612	976	621
sgRNA0140	412	306	366	420	388	315	274	246	265	134	191	103	110	140	82	123	127
sgRNA0141	270	230	279	333	423	354	631	629	677	420	446	715	685	699	585	606	588
sgRNA0142	610	397	474	545	459	435	537	362	448	220	405	295	317	284	239	200	261
sgRNA0143	277	214	221	255	294	202	257	249	240	147	155	237	207	177	168	144	166
sgRNA0144	14	17	12	28	21	23	125	107	224	138	119	873	546	738	1517	2012	937
sgRNA0145	420	309	397	455	383	396	626	523	534	322	338	365	418	316	366	310	311
sgRNA0146	397	394	492	504	344	333	338	268	396	211	287	194	197	154	150	115	157
sgRNA0147	20	21	16	14	20	27	99	81	78	71	39	101	114	85	93	133	100
sgRNA0148	163	98	87	85	77	67	250	230	257	165	241	324	200	316	384	301	230
sgRNA0149	484	385	432	462	383	377	459	406	337	194	330	380	220	228	250	211	194
sgRNA0150	145	113	104	159	123	108	451	326	421	338	325	573	580	497	619	521	585
sgRNA0151	6	1	1	6	1	4	23	6	17	9	19	110	58	79	257	369	174
sgRNA0152	415	254	345	384	388	242	277	365	243	139	181	241	208	205	217	161	166
sgRNA0153	532	413	547	621	606	458	546	619	549	431	456	490	549	494	438	387	424
sgRNA0154	472	359	414	517	555	341	476	449	550	314	418	483	373	402	420	373	445
sgRNA0155	539	457	489	545	477	428	547	467	504	286	500	400	430	324	345	282	351
sgRNA0156	595	463	537	588	628	516	573	655	576	401	489	418	481	426	407	335	340
sgRNA0157	352	279	322	385	441	346	624	545	683	461	485	833	799	705	607	535	692
sgRNA0158	407	274	300	388	347	234	377	274	215	146	227	154	198	165	158	113	158
sgRNA0159	492	403	545	545	523	407	534	587	552	435	378	432	449	360	411	348	403
sgRNA0160	689	876	496	428	298	469	255	277	259	197	201	241	145	154	154	124	123
sgRNA0161	228	217	223	337	242	184	255	212	257	136	202	197	207	146	233	162	117
sgRNA0162	302	221	259	283	266	247	291	258	271	195	156	243	204	162	218	185	156
sgRNA0163	454	310	407	421	430	279	595	504	547	222	322	385	441	364	393	329	363
sgRNA0164	378	325	391	400	310	327	447	387	400	187	275	252	261	286	275	185	180
sgRNA0165	217	182	217	206	208	181	140	183	207	127	147	106	109	107	93	54	125
sgRNA0166	199	194	193	275	382	291	515	514	522	413	450	613	590	778	576	489	424
sgRNA0167	39	39	39	46	36	68	436	233	689	367	296	1731	1210	1549	1609	2205	1354
sgRNA0168	297	208	240	258	203	150	278	194	220	72	175	125	150	130	188	125	147
sgRNA0169	216	172	148	206	247	180	572	566	621	399	317	620	748	669	775	669	778
sgRNA0170	433	358	494	484	443	407	478	420	383	251	344	274	281	250	291	311	300
sgRNA0171	68	93	68	210	204	201	582	571	827	591	575	2105	1556	2023	1871	2457	1763
sgRNA0172	708	501	626	651	568	510	540	392	431	304	377	256	270	242	224	158	235
sgRNA0173	281	231	239	243	200	200	127	110	69	66	102	74	77	51	60	37	66
sgRNA0174	245	198	209	160	233	208	230	208	202	133	116	114	184	115	207	136	148
sgRNA0175	498	374	532	685	583	484	594	432	527	420	447	388	361	313	332	272	367
sgRNA0176	549	398	474	587	562	458	734	578	800	439	517	590	651	480	568	517	601
sgRNA0177	405	329	390	509	487	365	389	425	452	262	279	265	315	260	276	201	281
sgRNA0178	703	650	772	858	1023	953	986	1057	1178	863	999	967	862	1055	953	638	929
sgRNA0179	245	176	210	226	207	271	233	183	198	108	146	177	170	133	108	88	136
sgRNA0180	349	295	306	361	321	319	329	306	291	196	263	172	226	194	112	152	211
sgRNA0181	529	396	520	622	544	487	494	482	394	341	416	335	331	333	280	267	315
sgRNA0182	385	253	442	377	413	326	389	396	342	183	229	312	254	269	149	275	271
sgRNA0183	66	62	70	58	71	55	231	207	225	113	145	257	304	293	268	252	258
sgRNA0184	74	88	68	204	144	131	322	330	442	276	290	568	421	566	547	604	592
sgRNA0185	347	321	457	486	392	339	436	393	435	224	327	342	297	286	287	184	250
sgRNA0186	589	408	488	573	533	459	530	467	466	376	399	415	406	343	425	258	340
sgRNA0187	99	111	126	157	198	145	237	208	190	135	160	229	190	196	159	274	213
sgRNA0188	622	486	578	599	623	539	633	485	567	260	506	410	376	353	357	319	425
sgRNA0189	341	277	336	362	305	284	343	262	316	210	246	274	210	212	277	248	272
sgRNA0190	299	221	222	292	253	207	298	327	277	151	149	219	205	185	182	145	170
sgRNA0191	26	29	25	67	38	43	165	147	330	188	170	886	628	737	1122	1450	806
sgRNA0192	166	154	216	251	171	219	179	188	191	118	130	97	157	105	158	96	109
sgRNA0193	687	530	645	787	720	578	651	651	636	440	555	501	490	494	452	292	495
sgRNA0194	51	48	30	65	55	74	386	217	635	371	263	1754	1504	1731	2489	3451	1997
sgRNA0195	231	205	202	272	207	258	245	184	262	133	158	174	138	140	157	91	186
sgRNA0196	317	279	281	308	334	270	301	291	290	192	245	249	224	197	216	178	203
sgRNA0197	18	42	38	82	41	59	359	319	830	466	469	2304	1659	2351	2943	4070	2719
sgRNA0198	751	651	800	807	761	692	798	780	752	483	592	541	557	559	435	428	531
sgRNA0199	719	510	607	560	707	522	550	507	525	332	501	389	361	400	432	327	380
sgRNA0200	721	570	630	708	589	537	583	426	510	307	478	404	374	315	329	332	334
sgRNA0201	655	483	374	485	346	403	103	100	72	71	70	80	53	45	48	58	33
sgRNA0202	466	340	450	470	329	393	301	268	243	170	292	128	141	130	198	163	142
sgRNA0203	561	388	532	531	497	361	458	424	451	217	350	324	346	296	258	251	295
sgRNA0204	663	499	649	606	638	657	583	589	634	360	490	403	397	365	418	303	383
sgRNA0205	743	566	818	754	803	689	693	668	773	399	550	479	525	550	477	428	460
sgRNA0206	675	474	618	486	844	589	787	630	913	458	777	527	536	586	682	511	565
sgRNA0207	408	395	417	414	431	389	455	382	433	341	341	329	319	281	312	291	314
sgRNA0208	918	701	866	893	1004	812	954	868	906	594	726	570	556	521	511	374	571
sgRNA0209	66	54	37	83	64	39	223	156	216	172	187	469	300	375	405	429	282
sgRNA0210	898	789	820	1007	798	810	815	853	763	438	661	537	525	567	612	477	487
sgRNA0211	579	456	571	566	640	464	618	514	497	280	491	388	355	389	347	289	377
sgRNA0212	951	589	779	1036	784	578	364	326	280	127	273	177	197	194	141	128	154
sgRNA0213	440	357	368	425	389	344	433	384	337	180	253	150	160	132	217	181	149
sgRNA0214	426	341	424	521	471	398	454	431	342	291	259	329	332	258	223	252	218
sgRNA0215	825	676	857	972	812	754	824	725	831	578	715	606	511	490	471	417	448
sgRNA0216	702	463	578	509	383	469	521	516	460	272	369	372	227	270	294	235	338
sgRNA0217	684	549	604	717	586	570	640	586	597	330	367	376	432	393	368	371	322
sgRNA0218	414	342	438	464	469	359	432	435	469	313	337	329	320	276	337	211	281
sgRNA0219	414	328	376	377	291	363	477	401	400	252	289	313	350	242	319	242	309
sgRNA0220	295	180	245	260	397	292	361	338	412	253	293	335	302	333	279	224	242
sgRNA0221	364	283	268	396	327	258	418	394	483	298	343	564	573	632	739	676	533
sgRNA0222	163	165	169	234	174	181	781	717	921	590	636	1699	1447	1816	1327	1508	1393
sgRNA0223	1107	931	1152	1182	926	812	776	759	638	472	675	423	418	302	546	356	425
sgRNA0224	1018	722	920	1033	910	837	1103	933	968	661	768	636	846	683	649	657	654
sgRNA0225	996	784	946	916	826	694	802	775	691	375	642	367	505	483	488	368	334
sgRNA0226	351	214	271	280	235	250	450	448	477	231	415	352	310	334	263	271	287
sgRNA0227	580	471	546	635	583	423	544	500	509	346	419	324	484	329	296	272	351
sgRNA0228	1	2	1	0	0	0	13	6	2	4	12	11	3	4	6	9	6
sgRNA0229	702	563	691	879	697	546	736	663	659	410	492	540	498	382	365	273	391
sgRNA0230	635	552	663	798	650	693	639	556	708	384	592	433	485	397	403	388	379
sgRNA0231	609	359	527	560	534	483	523	546	408	283	373	355	391	306	220	306	333
sgRNA0232	33	37	24	36	33	29	172	98	348	247	223	1281	801	1043	1703	2152	1367
sgRNA0233	433	323	355	415	405	334	407	337	378	234	259	285	318	266	231	239	225
sgRNA0234	368	195	362	230	357	359	800	643	853	513	671	712	894	923	1011	857	942
sgRNA0235	218	145	160	197	161	123	195	131	180	105	111	117	129	140	148	152	156
sgRNA0236	833	746	979	868	778	606	900	843	767	449	657	529	632	562	465	419	371
sgRNA0237	545	380	597	605	568	507	488	455	391	246	375	243	236	256	162	206	235
sgRNA0238	382	210	352	367	285	264	324	323	264	176	228	259	198	205	226	128	178
sgRNA0239	396	295	356	181	404	261	864	809	952	583	591	622	924	639	1064	508	835
sgRNA0240	327	291	287	413	593	375	761	796	914	516	582	1227	1208	1402	943	1077	1022
sgRNA0241	257	237	264	343	308	309	282	310	337	171	277	195	207	248	288	183	205
sgRNA0242	508	311	400	624	480	462	464	466	419	255	354	305	289	264	336	248	311
sgRNA0243	296	201	275	212	266	212	272	304	264	154	204	201	164	196	148	118	208
sgRNA0244	149	132	102	151	139	118	427	347	488	350	363	839	585	718	1028	1208	790
sgRNA0245	515	420	459	466	481	440	478	455	404	284	387	310	299	327	301	241	242
sgRNA0246	77	69	76	59	52	53	203	221	189	163	141	317	278	364	226	234	299
sgRNA0247	96	117	102	360	254	246	214	224	252	269	227	273	222	177	176	253	202
sgRNA0248	644	494	651	654	632	466	768	583	623	335	478	516	371	469	385	357	351
sgRNA0249	162	55	137	151	152	86	194	170	154	53	143	160	117	91	141	114	119
sgRNA0250	416	313	395	446	416	279	443	385	342	269	264	278	303	289	327	277	307
sgRNA0251	308	223	364	302	285	296	246	239	321	177	221	221	257	232	267	164	171
sgRNA0252	250	198	257	300	200	238	320	247	216	174	155	180	231	225	208	122	220
sgRNA0253	14	26	20	21	27	20	49	46	98	70	37	126	95	127	298	409	183
sgRNA0254	169	152	125	192	256	180	531	459	533	345	358	831	665	963	906	736	745
sgRNA0255	281	242	239	277	252	244	321	238	247	170	193	233	199	180	192	187	193
sgRNA0256	788	551	781	855	748	635	866	760	800	467	647	584	581	535	492	429	509
sgRNA0257	561	426	554	648	615	523	554	515	559	366	527	431	350	364	365	313	402
sgRNA0258	336	311	354	297	313	285	345	340	286	213	230	227	281	181	249	196	179
sgRNA0259	11	3	9	25	14	18	70	42	134	84	59	520	394	420	1013	1160	668
sgRNA0260	201	195	232	272	212	169	228	244	194	102	122	119	146	165	130	121	147
sgRNA0261	422	315	422	443	316	335	362	385	361	221	254	249	232	222	251	165	301
sgRNA0262	294	199	231	243	245	233	308	249	237	155	152	269	182	180	169	149	142
sgRNA0263	691	475	610	810	722	495	585	541	620	386	466	426	343	402	409	359	458
sgRNA0264	271	240	219	331	266	288	352	271	351	202	206	229	298	220	205	183	202
sgRNA0265	86	144	98	149	36	54	180	127	128	75	90	131	63	77	94	112	130
sgRNA0266	293	229	262	345	156	179	176	145	159	82	75	92	83	83	75	88	95
sgRNA0267	537	336	495	491	453	447	399	406	366	226	321	368	279	294	352	219	201
sgRNA0268	88	77	68	187	120	53	367	308	333	177	252	608	648	546	595	410	595
sgRNA0269	204	134	145	247	170	164	184	153	246	179	178	213	125	145	288	348	203
sgRNA0270	428	474	457	587	468	443	280	240	397	251	233	377	213	296	500	717	422
sgRNA0271	984	736	888	962	1072	835	695	631	767	441	581	497	526	415	371	394	369
sgRNA0272	541	424	558	634	565	418	562	458	539	354	352	340	390	355	401	341	347
sgRNA0273	732	458	696	736	845	579	683	635	647	410	568	550	421	457	355	346	447
sgRNA0274	285	237	264	234	315	316	361	344	318	217	220	271	285	226	251	197	233
sgRNA0275	184	277	136	657	798	653	587	512	881	527	590	994	735	799	1064	1057	959
sgRNA0276	348	253	247	328	314	240	344	292	318	244	160	265	251	221	210	185	232
sgRNA0277	407	323	410	428	373	405	488	490	552	317	325	432	442	390	354	348	443
sgRNA0278	312	243	367	386	410	366	486	367	560	303	360	441	468	411	432	386	489
sgRNA0279	468	366	491	449	466	480	512	451	443	353	296	327	279	312	333	285	335
sgRNA0280	1057	775	1029	1137	1204	753	1018	954	908	809	1080	730	672	640	699	460	724
sgRNA0281	180	114	140	347	248	101	370	322	293	171	279	309	279	315	305	169	253
sgRNA0282	183	180	138	483	336	310	702	672	1101	758	675	1340	1171	1356	1094	1556	1128
sgRNA0283	170	96	119	85	170	103	191	135	102	98	89	112	100	93	101	134	110
sgRNA0284	167	106	144	134	110	66	134	149	148	84	86	105	87	126	97	61	115
sgRNA0285	348	310	363	443	398	359	576	437	432	298	411	424	469	413	385	432	420
sgRNA0286	116	161	112	154	178	139	1336	1202	2151	1552	1284	9220	6551	8211	8276	13058	7754
sgRNA0287	67	54	52	71	106	81	164	144	150	104	112	244	204	229	171	203	167
sgRNA0288	389	311	360	341	232	265	385	457	312	251	263	334	316	318	283	279	281
sgRNA0289	651	514	599	570	687	528	817	700	743	461	517	600	570	539	487	479	553
sgRNA0290	1017	832	1076	987	943	966	506	543	434	325	488	353	357	323	337	258	324
sgRNA0291	591	482	572	715	482	455	648	610	617	437	531	650	565	545	496	404	526
sgRNA0292	550	424	539	573	513	483	538	443	472	246	417	282	354	282	249	258	342
sgRNA0293	927	588	771	986	894	777	809	737	793	474	537	500	619	549	444	397	381
sgRNA0294	377	275	362	400	493	293	565	422	435	300	347	415	407	410	493	427	429
sgRNA0295	417	306	306	355	118	170	432	429	449	233	333	328	331	256	282	210	345
sgRNA0296	731	557	683	659	699	563	681	661	679	428	505	404	399	435	400	339	321
sgRNA0297	518	400	607	557	457	403	498	528	415	279	404	380	291	342	336	323	325
sgRNA0298	421	335	362	438	393	397	469	394	418	229	287	344	293	330	256	248	276
sgRNA0299	396	326	365	479	368	371	380	395	420	215	338	253	270	239	293	210	229
sgRNA0300	656	485	584	676	591	585	710	623	586	435	380	422	483	377	452	323	441
sgRNA0301	682	584	598	781	745	467	586	572	553	419	410	510	470	407	481	348	395
sgRNA0302	8	10	17	26	25	21	80	64	171	82	99	639	365	456	1427	1649	893
sgRNA0303	21	19	24	44	40	34	212	136	441	189	153	1237	843	1033	2072	2989	1614
sgRNA0304	511	344	522	533	508	428	462	414	462	241	357	292	295	306	315	259	319
sgRNA0305	559	393	457	523	505	393	479	427	474	286	292	323	334	301	295	229	290
sgRNA0306	382	301	374	392	420	342	442	428	395	283	297	330	309	289	278	251	273
sgRNA0307	965	790	879	930	897	774	1082	856	933	516	726	658	635	638	575	469	598
sgRNA0308	711	498	755	767	650	660	665	631	695	420	496	465	526	531	493	473	502
sgRNA0309	490	382	400	364	411	348	511	419	366	319	334	282	293	263	207	233	233
sgRNA0310	526	384	451	577	464	439	469	465	488	292	354	387	269	378	292	218	338
sgRNA0311	326	208	284	374	340	234	412	352	302	209	230	267	302	218	199	204	189
sgRNA0312	691	567	780	782	809	643	729	545	660	561	605	587	522	440	393	340	472
sgRNA0313	286	239	264	365	633	417	659	700	766	497	553	590	771	861	512	473	538
sgRNA0314	859	639	939	906	821	756	882	791	794	519	748	736	525	513	520	440	478
sgRNA0315	57	36	52	86	64	47	136	156	190	112	150	265	182	205	227	272	216
sgRNA0316	489	356	419	341	433	444	434	419	470	282	351	323	314	241	227	204	264
sgRNA0317	530	347	428	356	357	406	477	438	534	236	476	418	275	304	326	278	314
sgRNA0318	22	16	16	14	21	16	106	87	80	75	54	80	68	96	81	122	68
sgRNA0319	440	297	402	461	374	421	444	405	415	281	308	301	304	290	258	280	289
sgRNA0320	518	317	402	479	550	355	521	423	401	229	334	294	421	306	261	234	289
sgRNA0321	663	424	664	729	582	497	457	582	483	359	458	480	368	382	328	349	286
sgRNA0322	514	412	572	560	612	500	530	500	514	307	427	372	445	386	324	238	356
sgRNA0323	25	17	15	26	24	30	61	36	117	89	68	220	183	190	419	628	264
sgRNA0324	544	364	480	426	409	390	473	433	428	314	381	306	304	262	333	296	248
sgRNA0325	673	553	637	726	712	534	585	605	588	428	777	461	423	473	405	380	481
sgRNA0326	575	489	582	562	467	386	506	449	464	337	442	358	340	390	325	305	314
sgRNA0327	263	168	181	257	193	189	290	306	311	244	225	360	284	363	235	280	220
sgRNA0328	341	275	228	351	181	248	159	149	195	136	140	118	73	68	65	125	105
sgRNA0329	1165	694	1081	1129	1035	907	1012	994	1015	568	968	594	758	651	559	580	641
sgRNA0330	615	445	634	608	680	553	567	543	626	347	532	525	415	390	317	343	397
sgRNA0331	536	314	542	475	601	490	408	412	399	282	311	368	292	330	300	267	301
sgRNA0332	558	710	555	689	393	404	203	169	171	97	131	111	105	143	113	78	97
sgRNA0333	673	460	657	741	805	580	772	661	730	479	619	698	677	820	641	659	693
sgRNA0334	250	228	230	413	203	266	225	244	490	311	239	237	138	118	251	347	188
sgRNA0335	107	70	62	75	48	61	158	91	114	50	110	61	62	69	91	50	60
sgRNA0336	492	448	468	551	505	479	514	496	397	292	341	325	341	329	213	287	291
sgRNA0337	344	290	408	354	318	330	334	293	291	180	250	196	210	192	157	189	233
sgRNA0338	337	304	358	408	269	335	261	298	261	156	244	170	197	196	193	139	190
sgRNA0339	239	179	216	245	199	171	193	160	202	86	108	98	106	123	96	108	108
sgRNA0340	640	449	628	666	644	520	596	509	616	399	352	484	378	374	311	382	321
sgRNA0341	390	325	427	440	412	386	454	391	415	309	303	315	330	301	257	264	286
sgRNA0342	229	167	211	245	305	242	377	340	420	158	284	361	464	393	489	343	377
sgRNA0343	382	311	400	408	339	328	468	403	321	247	240	322	224	240	248	226	197
sgRNA0344	235	135	240	168	123	170	437	388	354	252	331	427	420	410	324	302	394
sgRNA0345	650	466	591	593	539	518	535	513	459	353	436	359	307	310	363	251	345
sgRNA0346	436	306	465	459	409	380	396	378	402	301	299	291	307	243	273	217	257
sgRNA0347	14	15	6	29	24	20	165	107	316	178	134	1269	833	911	2476	3003	1617
sgRNA0348	864	570	821	862	860	732	854	688	837	502	671	557	548	597	520	380	483
sgRNA0349	407	324	417	437	437	302	357	455	344	190	278	286	292	281	261	175	245
sgRNA0350	177	139	189	152	158	163	148	184	197	97	84	128	105	99	102	81	120
sgRNA0351	376	245	308	325	267	295	327	337	302	215	210	250	220	183	226	227	167
sgRNA0352	402	253	333	318	397	377	448	404	401	293	364	375	364	348	317	376	317
sgRNA0353	765	511	732	794	755	568	678	681	658	449	571	540	425	450	390	444	425
sgRNA0354	449	311	442	427	424	358	423	441	474	214	383	332	343	278	272	233	233
sgRNA0355	154	156	187	141	84	129	130	94	104	49	88	53	69	47	87	43	66
sgRNA0356	204	161	142	181	196	185	433	403	543	406	321	512	565	555	451	433	512
sgRNA0357	659	478	659	614	634	562	660	543	551	387	426	456	404	376	363	319	360
sgRNA0358	22	16	23	23	18	22	104	97	108	114	122	271	169	159	248	397	259
sgRNA0359	24	29	34	49	22	31	51	43	156	79	97	197	116	154	310	465	272
sgRNA0360	493	424	527	533	486	416	515	529	482	347	294	358	386	332	393	364	356
sgRNA0361	650	520	661	681	706	642	642	681	634	421	571	499	393	409	371	267	418
sgRNA0362	26	18	13	15	13	18	51	62	39	48	31	89	74	81	57	107	64
sgRNA0363	539	486	502	652	633	526	567	429	486	381	445	497	408	308	252	241	340
sgRNA0364	123	126	89	249	195	160	504	394	591	470	432	1316	1032	1198	1021	1540	1080
sgRNA0365	539	375	520	533	447	380	349	294	261	219	261	197	233	195	206	223	179
sgRNA0366	430	293	347	466	364	339	362	356	334	209	291	246	281	229	281	126	233
sgRNA0367	184	161	199	191	209	173	233	203	194	188	182	165	108	127	154	119	120
sgRNA0368	298	294	264	207	102	191	98	60	112	62	93	58	55	30	63	61	27
sgRNA0369	57	46	82	89	61	63	253	266	270	173	214	391	373	449	361	315	464
sgRNA0370	249	158	175	224	174	166	352	314	663	352	296	444	381	420	464	673	383
sgRNA0371	34	33	25	66	31	39	79	87	106	77	66	294	148	204	251	374	251
sgRNA0372	307	182	244	92	212	232	34	26	28	19	25	32	27	25	61	44	22
sgRNA0373	571	452	592	676	571	506	529	490	596	347	419	404	355	327	377	294	309
sgRNA0374	344	240	307	316	315	319	382	342	358	240	269	228	203	215	232	145	150
sgRNA0375	387	297	368	374	358	270	369	374	343	212	269	229	222	273	225	192	201
sgRNA0376	590	490	685	621	738	509	719	641	661	406	580	449	461	416	369	337	416
sgRNA0377	719	519	665	705	622	537	655	624	644	402	572	479	457	421	421	376	419
sgRNA0378	221	182	221	211	187	150	181	239	207	115	105	134	209	162	115	74	138
sgRNA0379	381	295	291	329	387	308	362	304	286	214	302	197	249	190	240	151	179
sgRNA0380	281	205	278	373	274	276	265	276	250	158	198	143	176	163	159	141	167
sgRNA0381	611	402	514	509	553	445	579	546	630	357	494	407	399	415	315	335	332
sgRNA0382	111	89	114	161	126	126	128	96	134	72	98	78	73	51	66	53	88
sgRNA0383	234	162	164	285	324	246	570	453	818	524	426	1249	959	1203	1013	1150	961
sgRNA0384	502	402	466	416	456	420	497	468	430	337	346	343	307	338	273	239	332
sgRNA0385	420	246	336	355	445	364	596	558	546	321	464	469	665	596	472	370	513
sgRNA0386	379	336	377	419	514	441	646	614	620	354	424	406	378	365	420	366	355
sgRNA0387	599	368	549	570	448	420	470	497	455	266	364	366	325	327	326	238	318
sgRNA0388	553	482	616	556	630	476	525	479	504	350	463	364	326	348	386	317	285
sgRNA0389	830	698	946	770	866	692	843	792	672	544	711	553	569	512	358	439	589
sgRNA0390	910	691	815	920	734	790	704	721	617	412	605	470	431	341	447	323	376
sgRNA0391	694	557	590	786	741	554	787	673	614	428	559	469	489	499	474	362	410
sgRNA0392	246	194	223	322	283	211	254	237	233	164	204	222	163	199	180	162	151
sgRNA0393	427	330	439	492	402	375	435	346	362	201	306	258	257	240	306	227	305
sgRNA0394	813	571	659	843	714	717	722	705	698	530	672	501	407	499	490	374	435
sgRNA0395	2	7	11	13	4	11	63	84	163	49	70	714	527	612	1840	2507	1227
sgRNA0396	32	25	33	55	51	48	67	61	114	79	54	137	69	151	151	182	80
sgRNA0397	214	190	225	158	233	212	486	473	365	262	268	326	320	354	315	377	342
sgRNA0398	547	436	506	619	490	441	531	419	407	312	360	283	286	312	295	249	320
sgRNA0399	339	255	317	392	242	275	292	292	331	204	275	270	218	193	192	109	191
sgRNA0400	365	261	323	381	299	335	349	321	281	188	243	251	207	179	192	196	211
sgRNA0401	322	214	306	363	324	255	344	317	349	178	253	249	300	314	213	242	271
sgRNA0402	595	349	472	616	699	581	637	502	505	409	550	548	499	474	415	453	418
sgRNA0403	234	200	185	313	359	341	269	292	305	229	224	290	294	295	218	190	249
sgRNA0404	217	219	143	557	430	149	772	677	706	381	502	598	670	605	479	366	649
sgRNA0405	521	367	428	470	458	395	445	394	347	243	305	223	310	300	223	241	262
sgRNA0406	154	116	162	144	130	151	170	160	127	77	119	109	84	110	99	101	119
sgRNA0407	701	580	819	655	817	658	732	763	723	410	653	647	451	448	586	358	478
sgRNA0408	533	445	589	499	588	414	477	476	534	404	415	322	360	280	308	396	302
sgRNA0409	196	219	149	572	388	195	325	213	373	320	331	192	97	132	191	238	151
sgRNA0410	147	132	140	204	370	229	601	643	767	458	583	1096	891	1112	1219	897	966
sgRNA0411	274	202	282	314	212	235	297	278	234	218	167	148	191	191	203	157	156
sgRNA0412	690	463	624	654	614	572	608	607	694	406	487	437	423	414	382	290	380
sgRNA0413	329	253	321	264	320	227	356	328	274	190	222	227	252	271	231	254	237
sgRNA0414	340	231	283	429	382	328	75	55	109	103	87	40	17	22	145	48	16
sgRNA0415	293	226	253	314	226	229	259	251	254	188	203	182	218	200	145	220	216
sgRNA0416	158	119	144	151	141	176	467	366	405	360	335	409	524	369	416	396	318
sgRNA0417	516	468	542	501	544	620	602	558	712	514	619	409	495	415	408	297	450
sgRNA0418	637	482	551	655	627	549	584	610	592	473	497	462	509	430	437	428	480
sgRNA0419	382	280	373	415	414	308	365	346	375	285	288	256	289	291	278	181	300
sgRNA0420	384	262	359	393	400	339	482	437	319	202	267	264	246	240	216	260	219
sgRNA0421	384	352	374	359	396	360	406	358	375	219	267	266	307	199	211	239	226
sgRNA0422	51	75	35	194	95	117	449	353	962	494	446	2005	1515	1901	2363	4406	2476
sgRNA0423	191	185	178	272	337	425	512	473	541	402	502	796	639	680	400	638	529
sgRNA0424	379	299	289	300	383	241	380	346	449	256	292	178	178	144	194	140	143
sgRNA0425	460	369	446	399	352	346	325	331	274	187	227	216	257	171	175	137	220
sgRNA0426	688	579	733	806	634	561	729	540	553	408	571	443	435	457	315	368	331
sgRNA0427	529	422	580	564	548	467	508	511	486	281	391	340	404	281	322	317	302
sgRNA0428	418	500	408	436	145	323	259	258	171	155	251	138	181	169	136	106	140
sgRNA0429	442	278	458	434	403	433	385	399	424	266	314	260	330	282	198	204	223
sgRNA0430	273	195	291	275	238	254	283	295	279	150	164	175	255	197	163	144	179
sgRNA0431	63	40	46	63	43	61	171	132	210	181	199	139	79	133	138	245	137
sgRNA0432	28	38	20	11	11	23	165	131	238	169	165	163	112	156	261	309	160
sgRNA0433	915	617	766	722	887	625	854	756	794	500	636	564	517	460	565	473	572
sgRNA0434	454	325	370	358	553	426	376	440	347	299	349	330	326	319	211	263	293
sgRNA0435	532	420	562	599	590	468	596	643	555	282	338	459	439	396	324	287	391
sgRNA0436	185	144	195	209	242	202	212	221	160	133	170	138	148	157	103	115	125
sgRNA0437	396	341	406	437	343	300	336	300	306	198	184	203	168	204	152	166	169
sgRNA0438	567	393	478	490	417	390	484	367	407	221	304	220	269	213	317	187	259
sgRNA0439	690	456	558	528	713	541	508	549	575	332	520	468	357	393	303	248	390
sgRNA0440	32	23	31	47	59	25	200	182	250	185	145	327	382	558	347	323	310
sgRNA0441	826	637	799	860	806	792	825	712	724	421	694	569	573	594	508	392	492
sgRNA0442	398	318	410	457	417	356	455	412	420	248	321	323	299	288	195	200	212
sgRNA0443	35	23	22	23	25	25	50	62	99	75	60	176	145	170	364	532	264
sgRNA0444	811	534	691	702	657	582	712	644	612	399	478	506	558	463	450	478	355
sgRNA0445	270	249	298	416	491	407	837	838	980	679	673	1142	1112	1120	924	907	1054
sgRNA0446	565	446	563	655	709	621	824	640	732	529	711	661	766	784	589	566	617
sgRNA0447	60	60	48	128	64	83	285	172	399	256	251	992	782	1033	1289	2116	1202
sgRNA0448	244	169	254	276	610	446	557	467	649	385	417	599	575	548	460	404	452
sgRNA0449	290	227	225	222	271	175	243	240	226	160	153	212	173	143	160	119	166
sgRNA0450	16	15	9	21	8	11	48	37	78	30	37	247	168	159	611	709	359
sgRNA0451	531	381	526	502	426	433	353	346	342	178	299	309	255	187	202	210	303
sgRNA0452	300	212	267	332	204	225	268	197	186	146	155	158	152	137	115	103	137
sgRNA0453	356	300	408	298	474	401	419	505	476	267	287	291	292	297	295	197	242
sgRNA0454	595	448	480	824	658	565	887	895	999	603	756	995	1074	1023	926	689	868
sgRNA0455	172	183	174	158	104	169	110	60	134	97	104	25	17	43	46	58	32
sgRNA0456	526	469	665	535	492	450	362	308	299	201	318	134	91	100	88	158	83
sgRNA0457	392	385	334	435	417	397	458	471	401	323	458	311	240	272	189	285	265
sgRNA0458	373	340	395	429	316	343	357	355	406	210	236	250	301	229	248	251	268
sgRNA0459	1191	859	1237	1197	1319	1025	1136	1092	1064	539	955	768	699	774	787	578	727
sgRNA0460	38	27	14	62	36	55	198	158	369	198	165	1176	949	1042	2140	2809	1529
sgRNA0461	1	0	0	0	0	0	1	5	1	0	0	4	5	5	5	15	5
sgRNA0462	371	280	317	413	303	336	367	380	339	248	227	286	210	196	195	148	206
sgRNA0463	328	243	314	326	361	275	305	253	255	144	278	168	167	186	152	196	189
sgRNA0464	713	586	824	661	694	640	586	525	609	402	629	342	365	295	397	386	347
sgRNA0465	904	614	895	1009	997	822	874	883	943	601	977	768	700	748	521	459	610
sgRNA0466	296	238	297	281	354	332	369	292	340	170	220	243	216	243	266	207	195
sgRNA0467	223	189	195	168	123	110	89	82	83	53	70	47	30	46	43	61	50
sgRNA0468	292	214	281	280	359	241	298	237	319	198	230	221	235	216	233	210	236
sgRNA0469	872	622	727	644	817	661	808	750	629	453	608	552	605	508	480	496	402
sgRNA0470	541	298	338	268	351	315	579	407	421	361	457	532	535	454	415	460	538
sgRNA0471	652	471	551	715	593	537	637	636	566	402	410	463	460	390	332	341	390
sgRNA0472	477	371	463	486	436	450	437	418	446	299	274	357	371	251	290	271	350
sgRNA0473	600	440	495	627	546	510	613	555	535	325	435	434	438	392	385	357	337
sgRNA0474	787	623	728	888	776	695	747	651	645	486	563	433	503	430	592	423	443
sgRNA0475	497	344	315	550	424	390	544	491	518	313	412	405	415	352	295	229	303
sgRNA0476	300	184	278	233	200	179	229	232	216	118	141	137	191	177	219	157	171
sgRNA0477	374	357	351	488	375	445	457	363	448	262	346	351	262	270	231	216	250
sgRNA0478	475	366	449	624	564	454	377	409	361	225	344	348	355	355	239	295	337
sgRNA0479	1092	790	1079	1205	1071	994	991	881	903	486	813	709	632	565	598	497	534
sgRNA0480	451	280	376	256	395	278	658	582	488	322	472	661	573	637	590	417	472
sgRNA0481	277	225	200	180	149	182	33	50	37	18	43	29	20	36	35	34	30
sgRNA0482	190	172	219	232	251	219	300	292	356	154	218	249	295	308	240	220	282
sgRNA0483	384	281	394	451	358	308	428	390	330	251	306	229	251	313	268	201	287
sgRNA0484	777	485	587	721	778	599	656	514	558	385	489	470	500	379	389	293	330
sgRNA0485	1145	820	1114	1161	939	922	503	563	579	440	571	306	320	283	295	378	270
sgRNA0486	312	246	242	261	252	227	244	230	220	106	180	144	148	160	177	148	121
sgRNA0487	29	22	21	31	18	21	112	76	218	126	109	624	436	512	1176	1340	859
sgRNA0488	291	228	237	252	317	224	302	257	273	176	203	238	240	225	212	230	207
sgRNA0489	264	192	265	196	279	209	485	434	445	345	369	511	561	504	559	440	464
sgRNA0490	706	527	758	776	715	647	772	745	659	436	670	498	619	449	408	426	413
sgRNA0491	433	247	326	366	272	256	316	338	272	161	233	282	217	150	211	191	144
sgRNA0492	57	45	27	63	50	45	179	133	363	182	163	955	713	893	2297	2534	1389
sgRNA0493	768	672	795	745	756	782	398	456	349	247	280	283	207	169	238	217	197
sgRNA0494	528	392	525	559	616	553	917	691	717	433	418	712	571	592	525	687	521
sgRNA0495	1721	1480	1312	1251	1002	1111	225	171	185	94	187	134	176	169	156	170	121
sgRNA0496	559	403	455	637	461	430	458	385	474	276	353	282	311	295	219	237	266
sgRNA0497	306	166	204	367	278	236	195	189	226	136	145	207	181	114	168	131	125
sgRNA0498	702	532	723	883	697	543	692	589	640	384	552	482	502	443	457	365	487
sgRNA0499	139	94	88	70	109	81	259	255	335	187	244	462	387	415	333	448	348
sgRNA0500	644	581	683	1038	943	675	362	284	479	314	319	364	284	303	282	381	337
sgRNA0501	0	1	1	2	3	0	4	4	12	4	8	27	17	13	38	49	28
sgRNA0502	889	747	933	951	1013	824	817	726	724	527	630	574	527	482	457	508	453
sgRNA0503	270	159	309	265	215	253	276	237	185	170	206	200	215	193	173	126	173
sgRNA0504	232	229	187	405	393	208	586	575	595	305	511	588	587	595	405	400	491
sgRNA0505	66	44	30	49	21	33	320	256	498	373	341	370	283	315	577	704	420
sgRNA0506	6	6	7	4	3	2	9	9	8	3	5	12	14	7	10	13	12
sgRNA0507	392	289	339	386	336	269	441	338	330	162	273	303	290	256	243	227	251
sgRNA0508	50	39	23	128	68	50	277	208	552	239	237	1769	1379	1688	2324	3206	1916
sgRNA0509	950	650	840	939	679	593	604	498	533	376	464	327	340	338	350	325	293
sgRNA0510	552	564	524	647	350	440	150	117	157	95	124	103	74	93	101	101	77
sgRNA0511	87	61	65	134	122	69	214	186	379	238	281	400	250	335	504	627	491
sgRNA0512	56	28	28	44	27	38	68	55	156	119	113	164	137	97	268	365	199
sgRNA0513	31	20	31	38	26	35	124	102	298	157	128	957	712	795	2361	2755	1407
sgRNA0514	8	5	8	7	12	18	74	48	120	67	69	483	328	405	1122	1316	652
sgRNA0515	655	589	596	722	679	587	724	648	601	454	530	531	536	413	427	351	459
sgRNA0516	382	404	404	598	506	389	498	457	428	320	389	382	368	326	347	277	350
sgRNA0517	634	565	672	751	662	537	722	621	565	363	476	380	524	505	475	347	412
sgRNA0518	607	530	698	663	636	636	596	620	631	375	497	438	478	431	339	319	395
sgRNA0519	422	320	396	436	325	307	218	198	162	93	146	150	140	143	96	91	119
sgRNA0520	359	267	274	372	287	303	325	267	369	189	246	233	203	201	208	163	183
sgRNA0521	120	115	69	138	185	171	415	364	547	401	414	1019	840	891	705	883	792
sgRNA0522	407	231	224	114	98	124	50	70	77	41	73	96	38	35	51	60	35
sgRNA0523	624	479	527	709	624	512	898	751	834	557	623	669	783	739	653	563	749
sgRNA0524	20	16	25	37	29	36	97	91	77	60	82	123	105	108	77	107	108
sgRNA0525	614	507	581	920	655	659	845	900	873	592	612	642	684	613	643	424	564
sgRNA0526	37	36	40	143	60	57	429	293	760	470	378	1386	1107	1329	2073	2472	1684
sgRNA0527	60	16	29	43	36	60	178	125	183	106	108	271	252	278	161	272	206
sgRNA0528	275	238	284	286	303	284	308	255	315	202	232	217	183	178	217	174	213
sgRNA0529	728	486	621	785	749	612	686	636	707	411	543	380	440	395	393	392	350
sgRNA0530	570	467	560	561	518	428	497	482	437	321	405	365	343	311	361	239	285
sgRNA0531	450	306	388	445	464	365	446	334	405	289	333	348	363	338	218	240	269
sgRNA0532	1218	1099	1321	1074	1054	1045	632	717	566	321	647	332	378	338	396	225	372
sgRNA0533	1229	865	1054	1054	1027	794	952	733	806	582	833	537	594	523	499	422	444
sgRNA0534	823	581	650	717	827	615	691	722	582	446	587	408	501	398	437	360	414
sgRNA0535	29	11	12	17	11	12	98	92	164	103	97	93	67	86	167	200	123
sgRNA0536	589	469	602	541	555	474	572	558	479	357	416	287	327	343	317	267	371
sgRNA0537	1044	824	1101	1011	1109	903	1026	871	894	494	826	830	769	663	664	566	607
sgRNA0538	123	77	73	84	86	100	223	249	282	204	234	287	158	178	155	313	259
sgRNA0539	212	214	252	206	196	174	165	171	167	124	142	104	137	106	99	106	104
sgRNA0540	224	233	232	204	74	120	720	425	608	310	547	576	777	591	564	356	772
sgRNA0541	26	34	26	28	7	16	127	69	91	58	92	121	163	160	190	99	163
sgRNA0542	140	153	119	124	66	65	187	92	149	76	94	149	98	89	65	88	95
sgRNA0543	84	70	99	92	119	112	302	273	307	185	201	325	451	297	321	281	222
sgRNA0544	216	262	272	189	99	170	161	112	105	101	117	74	69	59	81	88	53
sgRNA0545	104	106	62	421	228	132	421	372	655	471	445	896	671	786	805	1278	861
sgRNA0546	384	317	397	478	370	338	379	409	353	275	224	281	265	239	235	256	243
sgRNA0547	547	421	498	541	539	423	568	573	603	290	370	455	459	404	359	316	409
sgRNA0548	258	227	218	223	253	207	223	156	200	64	158	188	122	96	131	60	120
sgRNA0549	34	35	33	66	26	34	104	95	229	96	116	866	636	590	2021	2140	1071
sgRNA0550	294	188	229	259	259	198	251	229	230	151	191	207	186	170	147	153	148
sgRNA0551	653	555	700	743	565	547	724	618	674	491	498	385	409	449	476	375	437
sgRNA0552	421	326	464	397	440	405	373	373	400	252	297	284	267	287	230	241	167
sgRNA0553	384	290	319	420	420	356	377	359	328	201	307	251	292	269	239	215	274
sgRNA0554	591	476	590	668	633	516	492	470	489	360	405	410	426	350	294	258	307
sgRNA0555	341	192	303	420	319	255	680	676	612	479	486	684	794	626	563	496	625
sgRNA0556	420	290	398	437	366	318	442	379	380	250	318	315	293	243	253	222	263
sgRNA0557	367	263	341	353	405	332	468	491	554	333	320	541	414	450	433	450	449
sgRNA0558	433	401	467	387	418	424	395	379	362	261	353	308	305	323	274	293	298
sgRNA0559	568	352	514	528	502	372	564	469	490	309	397	440	421	381	367	303	363
sgRNA0560	357	303	325	395	476	401	382	395	460	343	303	395	373	298	301	310	337
sgRNA0561	609	447	676	637	633	506	578	565	490	393	377	463	425	384	386	353	357
sgRNA0562	494	376	502	564	565	407	457	443	479	332	419	277	339	374	275	306	267
sgRNA0563	710	426	545	718	587	517	592	535	510	362	524	414	452	333	440	312	337
sgRNA0564	36	36	25	82	62	51	363	303	657	343	297	1953	1300	1870	2250	3035	1925
sgRNA0565	89	47	74	135	105	73	7	11	10	7	4	10	3	6	4	16	4
sgRNA0566	424	372	392	396	296	354	346	311	321	188	206	252	204	163	162	141	187
sgRNA0567	0	1	0	1	0	3	14	8	6	10	9	12	11	18	40	42	28
sgRNA0568	86	124	100	148	83	42	436	326	351	246	244	547	764	456	491	491	637
sgRNA0569	922	780	979	956	864	794	778	758	701	536	703	452	494	467	393	399	465
sgRNA0570	505	447	585	656	539	527	560	549	558	335	397	395	420	457	458	283	362
sgRNA0571	434	327	378	443	429	392	462	493	411	279	323	342	354	327	308	278	319
sgRNA0572	527	335	465	470	475	376	528	443	461	272	326	306	382	305	314	198	289
sgRNA0573	291	158	164	218	137	188	78	71	211	180	151	43	26	19	71	125	50
sgRNA0574	387	280	332	334	360	289	358	322	304	233	267	205	202	240	153	106	200
sgRNA0575	360	280	321	291	361	272	330	337	314	223	242	269	213	223	167	184	221
sgRNA0576	8	7	8	8	8	11	45	42	75	32	44	167	138	120	148	183	131
sgRNA0577	349	262	305	307	275	326	356	306	376	272	223	218	266	227	208	205	193
sgRNA0578	537	434	460	505	581	513	529	419	492	340	386	417	382	258	351	299	310
sgRNA0579	425	372	464	478	482	415	516	537	476	344	446	417	411	360	311	384	389
sgRNA0580	597	347	448	530	638	487	621	542	616	283	428	457	409	366	435	354	430
sgRNA0581	394	342	360	343	531	294	674	643	829	369	623	852	612	624	902	661	662
sgRNA0582	133	142	139	288	214	227	457	560	684	466	489	881	764	784	853	720	621
sgRNA0583	280	236	258	213	248	239	302	237	297	206	178	190	177	172	218	183	177
sgRNA0584	203	135	200	189	220	165	196	197	190	143	145	145	106	162	102	121	104
sgRNA0585	666	463	576	671	554	468	510	489	495	364	415	349	353	346	304	307	273
sgRNA0586	253	279	289	443	551	373	674	586	852	610	708	699	650	698	484	426	529
sgRNA0587	24	18	22	44	15	27	146	122	280	134	120	675	455	602	1348	1596	844
sgRNA0588	253	247	242	590	609	480	744	661	886	626	594	1283	910	992	825	947	886
sgRNA0589	301	227	226	271	230	225	395	335	377	215	251	324	334	331	301	317	322
sgRNA0590	84	53	67	146	78	69	230	153	371	287	198	283	246	252	405	456	316
sgRNA0591	328	230	294	401	291	269	369	316	307	192	203	267	254	175	192	149	218
sgRNA0592	473	426	567	472	573	489	691	565	592	435	504	535	517	455	442	328	435
sgRNA0593	312	199	270	298	275	204	258	227	266	154	235	163	176	203	117	145	169
sgRNA0594	647	414	531	614	560	514	578	509	525	297	405	437	394	391	336	403	303
sgRNA0595	792	593	742	901	690	562	767	636	740	423	581	596	566	535	482	427	432
sgRNA0596	646	446	587	732	641	567	619	611	647	446	522	474	485	449	373	366	466
sgRNA0597	655	461	555	729	583	534	591	527	587	280	460	348	403	376	349	331	387
sgRNA0598	303	240	279	343	266	299	297	281	321	218	205	190	223	215	230	193	230
sgRNA0599	894	632	838	869	972	673	961	815	803	639	755	573	608	491	509	625	553
sgRNA0600	142	143	138	162	137	131	228	179	143	107	110	78	136	131	109	124	130
sgRNA0601	749	627	861	903	954	706	830	825	753	511	705	571	599	589	515	443	503
sgRNA0602	477	366	515	531	451	383	542	435	511	338	371	401	371	373	407	253	307
sgRNA0603	459	438	520	450	498	406	517	481	528	249	354	414	374	294	319	312	296
sgRNA0604	750	572	724	681	634	614	729	663	658	371	541	480	371	525	478	304	443
sgRNA0605	405	297	334	330	305	321	404	362	321	223	268	247	290	244	231	245	210
sgRNA0606	240	189	216	373	306	275	334	346	386	359	313	482	375	413	514	556	474
sgRNA0607	487	286	387	450	449	329	423	404	394	239	364	307	296	346	251	227	217
sgRNA0608	671	503	694	707	684	597	625	650	651	401	543	416	442	301	378	350	394
sgRNA0609	624	477	650	573	606	469	602	492	437	440	425	282	327	352	312	300	327
sgRNA0610	755	496	755	629	679	604	689	633	594	487	508	503	380	416	368	274	523
sgRNA0611	858	775	777	1311	1053	815	258	268	597	432	411	68	66	46	124	131	75
sgRNA0612	266	305	309	610	900	552	479	432	524	385	361	521	410	421	378	346	304
sgRNA0613	692	446	603	697	708	678	759	631	597	381	599	539	449	384	524	358	460
sgRNA0614	546	416	516	527	510	511	487	447	558	279	396	300	321	266	263	255	319
sgRNA0615	433	366	427	492	449	379	574	479	473	224	350	340	371	360	262	260	304
sgRNA0616	288	236	241	328	252	267	290	259	265	183	194	219	221	199	164	116	218
sgRNA0617	556	432	585	643	534	486	591	494	586	314	371	355	442	385	364	264	323
sgRNA0618	436	309	437	403	350	369	417	399	388	225	286	319	265	240	208	216	243
sgRNA0619	410	279	386	480	373	306	381	408	432	193	285	282	338	282	196	221	277
sgRNA0620	358	271	411	460	403	319	345	361	388	242	277	231	227	262	271	217	210
sgRNA0621	458	428	520	524	574	547	447	406	443	365	393	301	305	278	249	241	288
sgRNA0622	366	275	355	357	365	279	379	296	389	212	224	200	250	205	188	188	183
sgRNA0623	331	235	224	172	160	151	236	212	122	136	224	171	94	101	85	132	112
sgRNA0624	665	509	526	506	516	406	350	429	283	219	310	149	162	150	116	119	155
sgRNA0625	497	326	505	576	515	426	458	399	359	232	309	323	232	273	239	242	256
sgRNA0626	390	280	337	282	364	271	378	295	297	186	266	204	258	218	149	192	205
sgRNA0627	53	47	58	121	58	86	354	288	703	396	287	1207	1072	1316	1421	1557	1165
sgRNA0628	147	229	104	70	38	78	34	27	20	18	23	41	12	35	24	38	19
sgRNA0629	384	263	355	373	347	292	348	327	328	246	290	245	259	202	209	228	226
sgRNA0630	415	299	377	377	374	342	346	422	296	248	250	223	282	272	203	222	203
sgRNA0631	571	568	546	635	622	540	672	555	582	368	476	436	467	368	348	352	363
sgRNA0632	411	368	334	420	229	336	75	85	103	55	79	84	47	35	68	58	48
sgRNA0633	680	438	600	566	629	531	802	689	770	412	542	666	653	623	402	512	520
sgRNA0634	607	459	562	563	597	492	551	437	586	345	368	316	279	408	439	391	306
sgRNA0635	361	289	390	459	369	347	357	356	399	224	326	323	299	271	276	257	277
sgRNA0636	356	272	335	379	351	305	366	303	386	195	238	196	286	254	194	126	247
sgRNA0637	941	668	880	951	813	644	768	769	740	513	691	573	460	444	539	445	419
sgRNA0638	542	390	537	593	622	492	738	606	738	435	587	613	592	748	506	453	523
sgRNA0639	618	474	693	726	678	542	682	629	591	386	469	474	427	515	282	365	391
sgRNA0640	538	375	479	475	814	449	377	333	260	199	341	296	221	216	190	274	184
sgRNA0641	424	364	440	292	552	419	452	392	335	223	330	223	238	179	235	187	215
sgRNA0642	707	439	727	677	668	665	697	613	604	387	460	456	405	425	320	358	342
sgRNA0643	580	457	650	581	501	466	488	452	356	340	379	281	371	317	298	251	237
sgRNA0644	289	252	295	427	459	386	134	162	212	142	142	347	223	324	353	473	264
sgRNA0645	675	480	538	583	672	586	578	563	562	391	523	371	458	379	344	355	367
sgRNA0646	482	366	434	550	396	439	466	421	499	288	337	355	376	287	349	251	289
sgRNA0647	237	200	311	271	256	255	289	231	293	187	167	161	230	153	214	137	180
sgRNA0648	326	221	277	353	295	236	304	328	272	122	222	256	179	164	185	146	229
sgRNA0649	18	16	9	29	11	7	156	112	294	193	169	584	479	493	856	1414	781
sgRNA0650	34	32	29	44	37	27	162	92	258	174	180	851	522	580	1383	1941	976
sgRNA0651	437	343	415	373	375	319	361	330	388	233	327	235	191	239	215	201	264
sgRNA0652	275	207	223	302	271	193	547	515	605	493	408	824	779	865	857	655	753
sgRNA0653	294	226	302	416	510	429	849	763	962	671	689	1061	1178	1094	1154	985	1118
sgRNA0654	350	221	353	348	344	273	417	422	459	267	352	341	310	326	379	282	299
sgRNA0655	456	406	456	477	468	462	498	485	544	334	335	435	390	284	300	307	287
sgRNA0656	509	437	483	579	464	418	501	480	487	271	373	386	359	337	327	221	303
sgRNA0657	711	469	685	633	639	467	616	624	492	190	503	457	455	391	441	288	373
sgRNA0658	268	166	160	150	114	111	731	811	781	492	471	899	918	913	1155	874	992
sgRNA0659	279	251	322	410	356	282	346	338	403	231	303	238	233	221	229	147	237
sgRNA0660	181	161	137	242	261	240	496	386	521	367	300	563	551	548	552	421	454
sgRNA0661	767	571	642	695	706	592	651	543	563	411	489	477	356	405	364	302	363
sgRNA0662	323	207	224	467	649	406	586	596	802	500	614	1084	899	1106	812	802	958
sgRNA0663	264	240	274	345	288	267	293	295	282	181	197	161	175	164	206	213	167
sgRNA0664	489	298	466	382	568	437	553	526	607	373	414	549	600	570	671	481	589
sgRNA0665	80	87	54	143	83	77	169	137	251	153	126	391	193	229	304	326	205
sgRNA0666	5	7	6	3	7	4	34	28	32	25	33	26	28	30	62	47	19
sgRNA0667	265	176	312	259	246	194	277	287	269	152	222	189	186	167	173	146	141
sgRNA0668	777	472	641	605	707	578	678	701	695	453	598	510	572	418	403	373	395
sgRNA0669	787	632	748	867	924	624	904	799	803	517	551	603	593	556	504	513	529
sgRNA0670	446	306	392	459	398	355	324	305	341	217	256	265	193	212	172	180	206
sgRNA0671	466	369	443	392	359	321	437	432	483	313	355	452	357	326	373	362	326
sgRNA0672	672	446	664	562	482	539	554	587	521	328	474	410	422	415	305	285	281
sgRNA0673	174	103	133	240	132	128	134	125	316	212	205	140	92	108	140	280	201
sgRNA0674	87	151	108	262	139	110	581	503	1112	802	564	1261	1097	1236	1514	2093	1364
sgRNA0675	686	564	740	796	638	552	665	639	633	314	574	424	327	459	497	438	407
sgRNA0676	25	24	35	60	40	23	321	243	669	385	294	1781	1357	1596	3184	3835	2299
sgRNA0677	639	473	748	698	690	521	616	630	592	392	523	480	389	400	305	343	345
sgRNA0678	388	330	350	362	319	347	378	393	340	186	256	237	318	234	267	238	226
sgRNA0679	362	315	377	338	301	328	321	356	391	247	345	245	210	214	286	212	194
sgRNA0680	787	599	763	713	795	655	801	662	669	467	573	492	548	489	473	465	483
sgRNA0681	349	249	252	533	487	397	686	603	641	468	511	771	791	885	399	411	560
sgRNA0682	417	280	349	334	376	322	440	357	376	238	277	282	368	299	323	212	256
sgRNA0683	404	265	311	359	392	353	504	519	543	287	373	504	471	454	544	403	434
sgRNA0684	732	501	635	670	624	579	544	606	499	352	404	409	341	411	402	380	338
sgRNA0685	8	10	14	23	21	20	131	64	182	76	64	645	517	483	920	1417	636
sgRNA0686	309	207	248	216	268	260	647	590	699	447	414	659	811	627	646	736	728
sgRNA0687	408	307	386	485	473	416	597	451	559	385	432	562	484	452	449	447	465
sgRNA0688	892	673	930	745	986	807	1047	744	888	519	689	710	722	616	579	469	539
sgRNA0689	732	586	752	991	1210	824	870	769	820	503	654	656	657	631	530	474	504
sgRNA0690	694	449	572	626	552	524	601	529	516	367	497	376	431	298	332	332	359
sgRNA0691	476	365	475	459	486	449	537	418	388	262	324	245	328	336	318	319	331
sgRNA0692	310	173	201	268	308	264	337	344	368	222	277	267	304	285	256	201	282
sgRNA0693	431	322	436	448	486	411	383	312	361	236	289	268	302	199	220	244	241
sgRNA0694	603	435	576	604	450	504	622	558	513	274	404	420	476	344	375	379	302
sgRNA0695	898	647	833	961	818	667	802	748	750	488	643	512	506	433	487	382	462
sgRNA0696	754	558	720	586	681	617	662	647	591	375	502	438	420	433	383	316	353
sgRNA0697	206	190	204	221	420	285	551	544	535	314	485	612	561	548	523	403	476
sgRNA0698	774	676	692	853	741	701	953	772	928	673	700	656	681	586	846	622	662
sgRNA0699	235	147	144	379	270	198	542	458	936	536	514	2191	1419	1923	1892	2523	1872
sgRNA0700	185	134	137	143	167	138	263	229	430	232	239	1404	832	1016	2545	2831	1565
sgRNA0701	78	35	47	70	45	42	222	170	382	120	225	1704	1238	1355	2977	3880	2129
sgRNA0702	91	69	60	194	113	105	160	151	329	248	193	159	157	132	304	330	233
sgRNA0703	785	614	744	854	768	596	808	738	773	438	610	427	476	460	425	391	512
sgRNA0704	610	383	501	466	633	439	518	458	481	271	418	368	427	377	249	260	310
sgRNA0705	105	62	98	157	91	100	363	285	598	378	361	1956	1503	1887	2997	3638	2358
sgRNA0706	302	242	308	293	310	273	472	446	495	326	357	794	724	770	992	940	818
sgRNA0707	473	412	487	550	472	410	489	536	529	319	387	343	379	381	339	193	335
sgRNA0708	241	247	241	555	691	527	1001	976	1134	492	596	1266	1078	1298	1292	1218	1066
sgRNA0709	462	360	463	478	359	439	469	333	416	269	390	304	392	314	305	248	234
sgRNA0710	392	311	372	413	477	333	376	373	397	265	288	263	290	263	259	292	227
sgRNA0711	783	551	774	890	848	689	938	634	657	476	562	650	623	561	456	506	537
sgRNA0712	561	366	435	600	445	427	512	530	499	384	360	477	404	319	384	324	386
sgRNA0713	261	214	260	250	249	230	262	238	257	144	198	240	196	130	210	172	178
sgRNA0714	387	272	343	402	363	386	400	345	316	219	267	332	285	253	258	150	265
sgRNA0715	680	552	649	607	758	648	720	581	589	375	458	488	471	380	475	384	463
sgRNA0716	653	497	689	558	798	559	834	840	808	430	738	660	768	698	635	557	612
sgRNA0717	538	484	594	623	599	399	526	492	536	315	432	322	448	334	396	279	323
sgRNA0718	312	258	265	333	370	311	357	428	335	251	269	323	334	270	324	229	295
sgRNA0719	12	6	14	32	9	10	51	42	106	52	63	353	253	347	737	829	441
sgRNA0720	400	313	417	360	327	239	353	373	332	217	250	244	266	223	301	174	268
sgRNA0721	510	373	432	439	469	411	480	440	475	256	333	360	391	360	328	304	298
sgRNA0722	15	10	7	25	10	14	74	61	137	87	55	586	455	515	1097	1319	802
sgRNA0723	406	311	332	376	342	284	397	400	383	209	235	259	304	279	267	217	257
sgRNA0724	702	464	678	697	630	664	651	649	635	362	466	480	462	459	403	336	395
sgRNA0725	511	364	453	516	448	367	517	412	494	292	372	347	333	398	306	222	253
sgRNA0726	959	788	918	995	940	776	925	958	868	572	818	729	586	608	659	441	608
sgRNA0727	417	339	503	358	451	348	513	387	442	243	388	357	310	263	241	195	279
sgRNA0728	138	150	162	289	194	160	307	331	563	361	361	714	541	726	694	873	659
sgRNA0729	500	374	457	524	505	369	520	411	436	249	310	223	246	274	246	262	242
sgRNA0730	739	599	821	721	820	704	685	690	675	420	603	441	513	514	432	377	456
sgRNA0731	793	523	689	672	625	625	663	487	613	374	555	448	448	384	384	346	332
sgRNA0732	520	370	413	508	399	391	428	447	383	280	327	302	289	309	250	262	309
sgRNA0733	819	604	772	896	750	635	687	716	677	501	637	564	446	495	461	428	416
sgRNA0734	416	298	323	359	336	278	380	373	357	261	222	253	237	257	201	160	186
sgRNA0735	318	261	291	357	370	241	348	329	271	152	199	220	241	222	220	158	200
sgRNA0736	264	242	321	239	237	274	250	226	226	200	240	205	226	160	120	146	127
sgRNA0737	44	32	29	61	36	42	201	170	291	115	135	625	454	512	1075	1300	826
sgRNA0738	266	267	305	273	191	241	264	268	261	215	230	167	222	175	163	154	183
sgRNA0739	335	261	389	403	284	325	381	336	478	238	364	612	447	541	774	1006	762
sgRNA0740	142	119	126	193	173	173	701	535	971	615	633	2357	2002	2577	2621	3101	2399
sgRNA0741	1059	795	1102	1127	1130	950	1196	1055	1029	629	877	767	817	701	528	554	822
sgRNA0742	300	246	262	292	269	215	289	261	261	177	217	231	197	238	177	184	157
sgRNA0743	438	344	428	502	389	317	331	366	413	243	314	267	275	255	251	255	271
sgRNA0744	428	398	462	339	388	365	377	422	402	245	329	294	298	302	217	183	220
sgRNA0745	502	362	516	494	750	630	921	772	1064	590	724	1114	1087	1070	955	814	972
sgRNA0746	722	593	732	688	721	531	679	599	559	352	505	399	426	397	420	342	384
sgRNA0747	484	468	483	623	762	548	710	729	635	493	534	978	721	800	604	610	710
sgRNA0748	421	263	395	408	369	334	405	371	403	225	295	389	316	281	293	227	312
sgRNA0749	309	230	269	303	308	291	313	288	318	157	217	202	244	204	170	158	144
sgRNA0750	226	184	154	152	92	126	188	170	188	154	137	210	127	199	165	213	143
sgRNA0751	13	15	12	31	26	33	100	54	126	68	81	255	220	217	204	320	195
sgRNA0752	395	302	372	414	386	331	454	436	410	320	301	380	371	337	334	298	293
sgRNA0753	803	615	777	939	864	579	746	746	685	457	643	608	567	579	459	376	465
sgRNA0754	505	375	430	500	480	366	528	444	441	329	281	343	397	337	310	236	220
sgRNA0755	351	262	341	328	334	340	349	302	279	190	237	229	188	211	191	144	196
sgRNA0756	39	32	37	47	23	20	108	60	150	88	107	248	261	221	553	781	360
sgRNA0757	7	5	6	19	4	13	33	28	62	40	34	74	47	42	141	235	105
sgRNA0758	120	109	90	299	135	72	248	200	210	129	122	217	225	212	173	151	237
sgRNA0759	566	421	546	556	506	404	529	477	500	347	388	364	369	362	347	267	300
sgRNA0760	124	122	80	228	201	226	734	600	973	577	576	1695	1848	2187	1099	1109	1387
sgRNA0761	21	24	23	29	22	12	146	98	244	121	95	973	725	839	1814	2452	1207
sgRNA0762	529	434	438	573	548	524	642	499	500	378	300	351	462	323	424	338	402
sgRNA0763	231	188	229	201	206	201	201	234	177	137	121	175	139	127	147	142	119
sgRNA0764	302	199	263	320	213	242	273	220	247	149	175	207	218	197	238	117	217
sgRNA0765	122	91	71	113	91	57	251	213	325	301	268	320	186	192	221	235	199
sgRNA0766	745	510	646	767	728	635	754	737	758	430	557	573	604	473	458	477	532
sgRNA0767	297	181	237	387	257	182	399	365	361	223	210	342	411	313	325	247	310
sgRNA0768	441	296	410	402	297	357	432	467	356	236	212	302	312	287	245	251	306
sgRNA0769	654	558	626	686	501	509	328	394	329	173	293	164	206	218	160	186	159
sgRNA0770	152	133	105	94	96	143	138	112	134	97	117	99	98	84	86	103	122
sgRNA0771	50	45	34	41	9	33	154	108	213	150	104	315	337	279	600	509	320
sgRNA0772	410	258	386	357	374	366	533	570	531	278	323	418	446	383	396	278	359
sgRNA0773	751	593	721	781	734	579	707	629	632	501	543	487	504	477	426	283	424
sgRNA0774	451	275	228	339	215	247	75	43	79	76	67	35	45	51	73	70	32
sgRNA0775	120	106	98	250	195	215	421	426	683	466	501	1268	1035	1199	1094	1254	1048
sgRNA0776	12	13	3	16	15	14	47	29	112	47	49	232	161	161	364	384	303
sgRNA0777	174	205	172	320	395	320	532	461	398	272	341	552	566	436	389	392	399
sgRNA0778	330	243	204	426	480	337	444	370	428	366	392	759	551	701	492	478	478
sgRNA0779	166	119	150	139	190	178	274	205	243	172	177	263	240	202	248	208	185
sgRNA0780	0	0	0	1	0	0	6	0	1	1	1	5	2	13	13	11	14
sgRNA0781	465	293	453	344	385	423	576	499	441	281	401	415	325	368	283	280	260
sgRNA0782	358	272	360	328	435	351	466	497	725	371	447	406	603	364	477	494	521
sgRNA0783	46	24	28	43	46	53	168	145	412	187	209	1435	1001	1327	2661	3069	1807
sgRNA0784	16	16	14	52	35	36	146	138	362	233	120	1168	822	942	1865	2266	1243
sgRNA0785	84	73	38	34	50	39	1	12	13	5	5	3	7	10	10	9	1
sgRNA0786	347	247	220	345	418	397	793	749	845	564	650	1037	1220	1136	1046	920	923
sgRNA0787	213	161	165	165	265	206	332	284	359	209	224	291	370	364	312	362	292
sgRNA0788	56	63	36	94	69	21	264	221	211	123	161	374	472	415	482	292	342
sgRNA0789	147	189	167	317	416	273	629	488	801	446	468	1833	1525	1686	1910	2155	1693
sgRNA0790	288	143	231	127	298	224	310	227	182	163	214	182	179	136	168	157	172
sgRNA0791	50	36	52	47	57	49	103	114	94	83	71	147	130	126	147	154	109
sgRNA0792	356	245	295	237	220	250	182	139	120	71	89	143	96	112	121	106	93
sgRNA0793	612	332	577	694	798	586	802	723	877	424	769	641	762	558	547	566	564
sgRNA0794	887	714	858	754	672	492	442	468	487	324	472	424	282	302	331	225	308
sgRNA0795	238	148	194	146	318	259	569	510	472	282	375	448	484	665	333	424	521
sgRNA0796	16	25	16	20	11	19	90	64	148	106	86	332	284	333	624	889	491
sgRNA0797	24	15	30	26	32	24	60	44	115	55	76	238	230	227	531	816	336
sgRNA0798	513	393	612	524	632	402	573	574	601	389	505	471	435	475	387	350	428
sgRNA0799	741	584	764	798	807	711	939	775	1005	545	785	693	790	721	582	632	717
sgRNA0800	756	624	654	843	536	514	383	348	326	207	368	176	170	123	173	186	170
sgRNA0801	443	324	351	384	280	261	333	260	228	171	198	133	133	141	126	117	81
sgRNA0802	296	232	246	302	458	331	548	512	680	419	437	657	587	635	612	624	601
sgRNA0803	456	334	314	558	523	489	619	593	763	466	520	766	657	689	645	791	587
sgRNA0804	151	91	127	115	111	114	304	241	306	107	189	321	344	364	387	315	309
sgRNA0805	232	180	197	157	243	194	305	277	301	246	250	312	279	293	299	170	283
sgRNA0806	375	229	318	290	317	251	255	216	233	117	241	173	210	130	166	183	157
sgRNA0807	132	112	97	226	192	220	372	335	640	420	385	1133	841	1085	781	1123	881
sgRNA0808	76	53	63	79	81	76	113	88	209	100	116	305	174	249	478	632	332
sgRNA0809	93	47	67	88	48	47	110	105	193	112	127	327	265	252	663	758	436
sgRNA0810	53	69	78	112	67	61	234	193	525	299	280	819	564	708	892	1254	883
sgRNA0811	271	212	262	323	326	220	522	475	570	335	327	446	503	412	357	353	366
sgRNA0812	3	1	1	15	1	3	9	15	10	13	13	16	30	4	6	12	6
sgRNA0813	93	77	41	110	60	70	124	91	148	114	89	115	66	84	117	185	91
sgRNA0814	55	31	44	69	47	37	237	241	285	143	147	386	434	526	380	332	416
sgRNA0815	370	294	316	492	305	277	582	490	754	444	462	893	817	943	870	891	881
sgRNA0816	17	18	7	9	23	11	75	82	168	95	60	464	373	460	928	1125	716
sgRNA0817	8	4	8	8	12	7	13	14	4	10	4	16	13	17	15	27	14
sgRNA0818	51	19	18	31	31	36	112	96	315	148	110	926	743	776	1782	2509	1260
sgRNA0819	485	322	353	343	334	275	774	717	727	522	615	865	962	1016	629	661	772
sgRNA0820	88	46	75	78	89	84	145	113	153	96	119	173	167	173	122	157	162
sgRNA0821	152	92	107	145	233	150	387	375	347	345	306	359	425	399	462	334	443
sgRNA0822	13	11	8	14	8	16	48	22	86	41	46	289	299	306	847	967	473
sgRNA0823	38	34	42	57	37	53	124	93	234	159	93	543	404	488	877	1096	586
sgRNA0824	7	2	0	3	1	1	25	26	36	16	20	48	26	25	38	56	45
sgRNA0825	446	353	444	508	305	273	292	272	245	153	226	202	269	217	283	173	211
sgRNA0826	12	21	12	10	6	14	112	57	55	39	74	80	70	35	53	61	62
sgRNA0827	18	5	6	2	8	18	54	57	56	23	49	86	36	52	77	68	52
sgRNA0828	223	168	146	170	133	152	357	382	405	255	305	659	433	612	457	450	509
sgRNA0829	60	39	56	31	52	37	201	152	193	129	161	432	313	350	364	352	279
sgRNA0830	192	116	116	76	82	106	364	359	292	113	231	349	256	257	219	343	327
sgRNA0831	163	115	100	92	44	76	318	308	265	176	257	319	323	232	289	261	235
sgRNA0832	258	165	300	338	259	199	209	189	129	92	115	174	112	78	142	76	116
sgRNA0833	632	526	608	616	529	514	364	468	386	240	346	222	228	243	236	216	261
sgRNA0834	13	14	14	27	21	19	181	112	295	119	146	665	537	608	1070	1469	698
sgRNA0835	36	23	25	38	28	37	259	171	366	234	250	976	792	838	1943	2351	1246
sgRNA0836	318	276	384	411	399	339	824	746	948	672	594	1144	977	1134	1130	1019	906
sgRNA0837	765	736	704	1551	1349	905	685	692	970	741	819	853	678	855	847	938	930
sgRNA0838	208	149	130	242	144	160	157	144	364	256	244	160	154	124	215	258	109
sgRNA0839	66	60	65	111	118	72	416	327	575	399	349	1658	1353	1692	1712	2430	1806
sgRNA0840	106	66	62	71	95	70	157	133	203	151	129	260	241	302	278	272	241
sgRNA0841	64	37	57	74	86	64	188	144	374	257	193	735	589	663	1096	1377	790
sgRNA0842	124	160	138	230	179	54	459	264	331	220	177	416	514	428	476	377	449
sgRNA0843	168	167	166	279	202	54	366	288	356	145	152	377	513	427	479	293	446
sgRNA0844	590	447	614	565	555	559	610	493	512	399	588	395	326	410	323	280	347
sgRNA0845	496	368	468	566	537	381	433	414	434	236	394	250	360	331	315	260	300
sgRNA0846	738	487	706	787	714	651	791	680	667	378	548	492	466	449	457	447	481
sgRNA0847	446	352	459	467	440	396	412	400	408	310	361	310	302	350	299	232	278
sgRNA0848	504	420	459	401	495	373	522	436	449	157	349	343	316	299	250	232	269
sgRNA0849	801	901	817	1433	1884	1524	1206	1256	1422	1004	1305	1030	1047	959	860	798	1006
sgRNA0850	1494	1024	1330	1474	1447	1033	1418	1126	1263	886	1066	1091	874	818	889	789	878
sgRNA0851	263	221	259	333	255	276	274	224	261	176	145	176	184	182	159	149	166
sgRNA0852	13	13	10	12	9	9	44	23	72	47	56	224	149	206	622	670	375
sgRNA0853	7	14	17	17	12	23	129	77	231	115	69	975	754	809	2083	2756	1285
sgRNA0854	550	434	540	616	511	412	624	505	536	302	389	477	507	361	382	296	411
sgRNA0855	813	629	770	891	884	765	766	652	677	488	551	436	551	332	441	446	435
sgRNA0856	546	399	460	524	691	531	631	633	595	377	464	447	404	426	416	362	359
sgRNA0857	768	529	695	758	736	637	755	700	693	464	573	490	515	426	435	462	391
sgRNA0858	291	217	285	334	292	195	363	234	315	153	180	229	236	258	233	211	210
sgRNA0859	12	10	11	19	16	17	86	63	150	66	62	326	212	248	424	602	282
sgRNA0860	76	41	67	73	66	67	391	250	589	375	336	1857	1209	1387	2849	3786	1960
sgRNA0861	11	18	30	17	13	12	36	32	74	51	46	115	104	109	249	249	108
sgRNA0862	32	19	24	31	16	39	134	82	241	125	112	327	252	364	335	514	297
sgRNA0863	665	465	620	655	597	547	659	622	618	373	505	400	516	362	349	360	356
sgRNA0864	36	15	29	49	25	37	131	89	246	173	128	679	490	496	864	1476	661
sgRNA0865	441	284	399	467	382	312	372	335	398	171	332	274	285	273	252	214	238
sgRNA0866	88	65	90	91	62	73	212	201	327	228	242	531	410	460	392	327	368
sgRNA0868	447	549	512	1032	1860	1171	765	789	848	647	1015	908	656	856	505	697	753
sgRNA0869	259	233	289	215	273	205	227	236	190	144	151	127	116	131	178	135	87
sgRNA0870	346	224	269	298	418	313	482	500	602	267	407	482	585	580	599	422	521
sgRNA0871	369	372	389	399	326	289	206	211	170	100	118	137	108	98	125	131	77
sgRNA0872	201	160	164	186	119	140	180	180	159	116	131	203	187	159	169	193	232
sgRNA0873	526	326	524	503	499	408	558	541	655	378	479	446	391	408	404	359	365
sgRNA0874	242	179	228	267	244	216	277	245	198	143	160	189	169	174	158	104	149
sgRNA0875	272	272	293	371	337	287	369	270	299	149	193	245	247	193	266	166	202
sgRNA0876	552	426	485	502	521	491	562	487	506	342	486	345	330	360	335	250	384
sgRNA0877	1155	829	1176	941	982	846	958	821	895	616	847	770	659	646	633	580	589
sgRNA0878	555	412	591	607	560	501	659	545	506	344	455	426	454	328	285	300	313
sgRNA0879	342	316	280	370	305	370	324	351	310	204	260	246	245	239	205	167	207
sgRNA0880	367	287	375	396	372	337	308	373	298	206	238	281	219	232	177	175	240
sgRNA0881	358	286	343	329	346	339	333	329	317	195	274	218	243	220	201	200	241
sgRNA0882	549	378	460	484	483	401	476	508	417	292	356	385	330	343	349	309	310
sgRNA0883	281	214	240	205	253	189	261	262	286	178	206	242	207	186	146	160	182
sgRNA0884	216	132	146	214	240	167	140	138	190	148	135	145	132	139	132	108	154
sgRNA0885	384	303	333	418	271	297	312	293	358	215	227	286	237	191	220	293	268
sgRNA0886	827	501	738	779	751	577	712	581	689	403	679	421	502	441	465	348	423
sgRNA0887	489	391	448	502	417	447	553	439	422	259	271	357	344	262	285	289	291
sgRNA0888	663	486	631	655	606	568	602	568	604	398	421	461	383	370	326	297	339
sgRNA0889	554	458	613	602	486	483	493	466	549	327	364	394	383	349	371	361	369
sgRNA0890	563	302	425	487	466	352	464	443	456	266	329	364	255	335	227	247	242
sgRNA0891	272	206	194	179	232	241	231	233	220	146	204	171	163	157	134	119	179
sgRNA0892	90	73	85	200	183	201	332	332	479	250	339	1046	691	1009	794	807	726
sgRNA0893	363	328	326	354	340	321	329	317	329	244	313	215	221	250	234	192	244
sgRNA0894	442	301	485	428	426	351	484	379	427	232	384	317	279	271	286	248	285
sgRNA0895	308	281	365	358	363	259	336	313	364	208	267	240	245	227	136	142	206
sgRNA0896	337	259	274	252	280	270	299	280	307	202	195	202	206	197	193	205	207
sgRNA0897	502	383	444	485	415	347	379	391	408	233	369	310	254	268	306	192	230
sgRNA0898	391	309	372	489	382	309	333	356	367	217	329	247	263	254	235	194	221
sgRNA0899	1026	791	736	907	778	658	95	103	117	82	116	83	66	46	55	68	50
sgRNA0900	254	173	226	221	250	208	246	221	194	155	179	151	140	164	164	123	126
sgRNA0901	376	325	365	381	343	307	345	365	346	213	276	207	240	248	203	188	232
sgRNA0902	335	242	267	292	318	294	307	259	401	177	232	174	225	248	161	171	186
sgRNA0903	372	219	266	294	367	310	476	464	488	283	337	304	363	289	475	337	338
sgRNA0904	339	208	280	301	301	301	240	298	324	180	236	196	224	207	133	240	208
sgRNA0905	619	490	653	650	532	612	428	439	430	317	322	285	217	291	253	204	215
sgRNA0906	292	295	285	389	299	333	318	269	302	203	251	213	165	158	177	140	195
sgRNA0907	298	240	268	308	264	266	296	300	297	177	200	236	188	158	236	159	173
sgRNA0908	354	275	323	346	341	336	340	323	346	214	245	248	249	287	243	172	212
sgRNA0909	293	177	264	314	321	240	326	290	318	232	201	262	260	205	173	175	217
sgRNA0910	315	190	309	350	242	253	282	284	324	152	255	209	270	198	230	169	212
sgRNA0911	540	417	512	529	460	441	560	497	451	280	331	325	373	374	361	247	276
sgRNA0912	437	341	389	444	444	388	404	398	415	238	312	320	278	254	206	173	282
sgRNA0913	534	391	537	606	563	457	510	398	412	317	386	212	341	279	254	229	348
sgRNA0914	62	42	61	97	87	90	181	148	244	172	158	382	289	290	274	403	270
sgRNA0915	630	433	577	601	620	563	571	558	615	358	519	391	482	409	480	342	411
sgRNA0916	323	242	316	321	311	244	316	363	327	230	252	240	246	305	241	267	217
sgRNA0917	332	227	286	298	283	217	333	305	266	187	171	214	272	252	233	167	215
sgRNA0918	418	316	395	436	406	361	444	388	380	286	400	261	323	271	288	222	307
sgRNA0919	174	119	175	167	146	129	153	128	170	42	133	109	104	126	98	83	96
sgRNA0920	161	140	152	135	146	123	193	138	148	82	126	103	112	91	124	93	110
sgRNA0921	324	282	288	331	352	269	350	284	363	247	274	208	225	269	211	179	208
sgRNA0922	482	395	527	522	509	386	484	447	420	257	347	365	302	365	281	271	316
sgRNA0923	290	192	279	272	263	231	226	234	242	152	208	162	167	158	124	155	159
sgRNA0924	452	299	406	538	473	411	398	361	362	286	326	318	304	313	249	255	218
sgRNA0925	341	271	344	341	340	254	320	286	318	168	210	192	258	194	213	159	188
sgRNA0926	495	361	457	529	485	413	488	530	421	322	378	306	340	315	334	198	256
sgRNA0927	557	389	556	587	511	511	529	489	493	314	421	356	335	332	405	367	321
sgRNA0928	515	436	501	517	517	515	635	473	512	391	434	413	411	339	328	335	306
sgRNA0929	463	360	495	495	483	409	428	393	369	194	345	320	216	239	228	230	244
sgRNA0930	601	506	657	630	614	593	560	633	729	426	580	471	403	435	298	340	344
sgRNA0931	315	237	296	331	333	284	711	734	911	494	593	1360	1319	1325	1376	1311	1276
sgRNA0932	160	129	110	164	171	142	419	321	418	270	227	603	594	673	686	652	633
sgRNA0933	662	542	649	612	711	586	607	606	540	375	510	491	470	388	434	372	428
sgRNA0934	214	200	308	211	305	207	258	265	285	166	181	203	230	176	221	169	179
sgRNA0935	426	367	430	509	445	407	472	428	397	277	395	334	276	230	292	194	349
sgRNA0936	602	496	566	700	690	593	601	558	495	316	462	362	364	336	462	282	358
sgRNA0937	358	231	314	313	308	308	328	273	307	207	249	230	220	219	232	188	226
sgRNA0938	304	252	404	343	319	312	338	319	206	194	249	163	254	236	171	206	199
sgRNA0939	289	170	252	197	216	171	214	236	240	122	165	147	83	187	125	84	122
sgRNA0940	413	324	519	402	518	404	458	507	389	299	386	323	313	327	276	368	403
sgRNA0941	328	243	324	322	280	315	349	272	287	183	257	212	199	214	184	166	214
sgRNA0942	498	393	474	559	448	429	501	475	417	323	329	402	338	269	262	275	367
sgRNA0943	518	497	541	504	418	429	335	243	258	202	213	164	221	196	200	192	130
sgRNA0944	395	249	429	336	347	289	330	324	333	235	275	255	270	188	272	199	181
sgRNA0945	459	361	418	476	449	354	439	394	408	288	364	309	332	300	195	225	262
sgRNA0946	338	320	366	388	440	337	349	361	321	200	316	254	316	286	192	211	229
sgRNA0947	246	236	273	241	273	253	261	243	201	166	153	153	168	134	137	184	139
sgRNA0948	226	180	220	214	245	206	253	184	215	131	137	149	184	110	91	87	162
sgRNA0949	71	68	47	78	54	55	70	66	65	45	47	47	54	44	44	40	42
sgRNA0950	611	448	582	541	467	464	408	538	483	319	384	366	267	340	318	251	336
sgRNA0951	532	431	549	497	485	494	526	469	484	353	420	401	391	296	252	244	307
sgRNA0952	746	561	662	696	620	575	497	466	496	323	492	282	255	282	260	333	373
sgRNA0953	433	300	361	402	378	332	360	355	416	212	293	270	256	263	248	201	241
sgRNA0954	390	214	309	410	271	247	342	369	334	181	239	230	228	230	205	163	211
sgRNA0955	344	243	363	338	325	296	287	330	302	183	278	231	229	209	205	199	226
sgRNA0956	247	216	312	260	268	241	271	287	266	145	199	167	220	143	135	131	180
sgRNA0957	239	176	264	197	275	221	284	232	229	161	152	205	145	158	101	191	163
sgRNA0958	363	315	432	443	384	377	389	354	341	256	268	252	248	210	283	195	267
sgRNA0959	285	226	269	332	290	261	289	253	246	163	207	179	177	200	176	199	170
sgRNA0960	452	279	337	392	431	313	382	360	364	226	243	256	300	212	247	306	197
sgRNA0961	594	358	468	597	514	457	521	426	498	333	337	358	360	301	345	307	234
sgRNA0962	399	303	456	471	368	407	430	374	443	220	360	266	298	295	223	273	225
sgRNA0963	224	151	225	305	274	242	216	261	255	138	191	129	162	129	170	119	177
sgRNA0964	381	216	274	346	303	304	310	309	320	173	185	215	226	184	215	146	249
sgRNA0965	258	255	263	255	273	295	299	269	340	213	233	266	283	205	250	176	200
sgRNA0966	11	13	16	22	10	12	111	66	194	106	120	721	535	650	1391	1775	904
sgRNA0967	1017	683	857	1073	979	856	773	813	771	597	823	617	635	528	560	529	529
sgRNA0968	694	525	683	722	783	617	753	681	714	433	570	509	502	425	438	410	426
sgRNA0969	549	386	481	529	553	406	526	480	475	310	392	377	413	308	382	304	329
sgRNA0970	457	300	380	396	380	433	394	394	379	229	347	260	271	282	342	211	305
sgRNA0971	467	344	504	561	569	402	506	489	432	268	330	339	344	368	298	280	307
sgRNA0972	938	745	1009	1110	893	838	776	734	756	485	673	474	428	395	514	401	375
sgRNA0973	1107	875	1046	1140	1024	947	1045	1022	909	624	823	731	643	654	688	492	603
sgRNA0974	401	316	410	391	420	301	430	381	375	253	258	215	243	277	239	180	264
sgRNA0975	329	293	339	411	379	316	351	321	288	229	237	231	234	255	222	191	206
sgRNA0976	256	206	243	258	219	231	231	194	201	102	149	145	153	123	140	126	119
sgRNA0977	427	280	371	385	406	338	363	333	344	262	310	317	283	320	217	245	257
sgRNA0978	728	459	584	691	673	527	572	528	570	448	482	398	347	340	368	330	392
sgRNA0979	466	379	422	424	393	421	346	341	364	235	328	189	273	240	262	174	236
sgRNA0980	822	615	795	773	889	643	745	693	640	457	600	511	479	421	363	336	367
sgRNA0981	472	300	433	500	389	296	401	370	342	209	277	353	233	272	262	257	267
sgRNA0982	282	267	347	269	296	333	232	273	259	172	188	168	169	136	155	118	188
sgRNA0983	551	410	664	560	525	425	427	448	453	217	348	348	298	325	285	294	240
sgRNA0984	632	430	558	650	632	538	627	520	473	298	444	376	450	397	316	256	295
sgRNA0985	704	446	646	698	576	585	581	593	552	400	536	414	424	440	300	358	417
sgRNA0986	599	524	585	543	392	490	205	221	115	112	131	96	103	105	95	68	61
sgRNA0987	834	618	897	654	455	423	179	190	123	103	171	80	90	66	80	88	116
sgRNA0988	436	304	382	430	446	345	378	388	395	262	302	267	260	324	249	198	231
sgRNA0989	130	136	125	157	133	152	110	127	112	84	92	122	98	86	60	72	97
sgRNA0990	345	220	339	442	329	239	378	380	360	188	231	261	201	217	235	162	207
sgRNA0991	138	121	172	127	78	119	126	109	106	75	95	83	86	94	114	73	95
sgRNA0992	291	233	265	323	292	304	302	234	208	151	174	215	210	182	156	152	142
sgRNA0993	203	121	169	190	177	126	161	147	123	110	125	128	139	82	105	107	112
sgRNA0994	676	569	682	662	637	563	772	577	562	408	402	465	474	441	452	427	433
sgRNA0995	371	278	363	443	358	236	369	354	385	224	227	267	290	294	252	200	183
sgRNA0996	163	144	162	148	145	128	166	171	147	122	95	146	139	126	98	108	92
sgRNA0997	568	472	637	628	675	591	564	533	605	326	571	350	394	380	391	307	456
sgRNA0998	473	372	427	482	463	424	485	404	407	336	382	282	338	276	277	202	301
sgRNA0999	1011	768	1013	1031	952	849	895	969	924	591	801	626	649	557	556	445	563
sgRNA1000	275	265	239	274	277	216	258	309	292	149	192	172	183	214	161	219	151
sgRNA1001	269	211	276	257	279	197	284	267	238	124	195	280	237	202	208	109	178
sgRNA1002	539	468	557	570	613	441	527	417	508	335	445	429	363	324	244	373	291
sgRNA1003	390	389	424	516	493	428	419	450	426	317	330	313	330	310	319	228	305
sgRNA1004	506	369	471	545	572	418	484	458	525	227	396	334	338	283	344	275	257
sgRNA1005	868	634	813	917	883	745	740	673	835	494	722	500	595	502	456	633	568
sgRNA1006	410	319	418	555	441	422	410	431	437	274	350	366	283	315	234	263	301
sgRNA1007	566	404	510	579	425	386	421	346	431	227	397	308	216	254	276	173	250
sgRNA1008	551	377	520	592	456	447	509	436	463	216	357	366	382	305	243	259	317
sgRNA1009	794	670	792	846	735	726	687	732	646	572	600	497	567	451	437	428	438
sgRNA1010	520	418	524	639	396	353	454	393	370	228	330	263	254	212	227	207	205
sgRNA1011	596	515	605	652	604	547	583	575	558	343	578	407	425	368	266	374	402
sgRNA1012	319	236	297	306	350	275	334	264	303	186	274	198	193	148	163	206	177
sgRNA1013	972	611	852	938	911	839	793	805	766	523	802	713	533	561	454	512	486
sgRNA1014	528	388	497	528	513	380	474	466	455	164	386	304	358	315	333	283	242
sgRNA1015	728	521	628	613	688	598	624	668	712	423	580	516	437	399	446	364	414
sgRNA1016	669	418	584	597	615	455	648	595	575	362	488	525	426	445	470	409	385
sgRNA1017	85	79	72	126	106	78	106	91	102	67	47	62	85	48	66	32	47
sgRNA1018	759	525	713	634	671	577	621	592	788	405	526	573	715	614	591	457	538
sgRNA1019	536	631	459	520	366	431	145	195	194	165	232	81	61	80	75	103	82
sgRNA1020	492	345	438	484	488	489	500	429	460	266	395	338	396	355	406	299	338
sgRNA1021	614	574	607	676	631	601	798	612	581	394	486	445	449	492	415	313	467
sgRNA1022	455	393	456	498	553	500	414	481	513	353	418	318	313	250	277	232	309
sgRNA1023	612	386	524	510	573	470	563	511	425	260	339	365	382	261	307	330	344
sgRNA1024	601	427	442	498	528	532	501	511	431	320	477	364	392	314	298	169	317
sgRNA1025	592	368	480	581	462	389	473	448	429	292	411	350	329	404	312	242	349
sgRNA1026	130	115	104	292	252	111	458	383	385	219	227	336	390	384	325	246	318
sgRNA1027	176	139	127	264	226	101	375	363	333	196	257	247	370	360	230	228	323
sgRNA1028	178	87	138	258	214	118	459	406	341	238	287	366	457	438	285	247	381
sgRNA1029	130	97	126	115	89	112	134	119	100	77	88	71	60	65	118	82	46
sgRNA1030	42	37	27	47	26	38	61	63	135	57	65	381	259	249	747	867	450
sgRNA1031	396	296	409	423	361	343	361	378	366	225	223	237	227	286	249	206	232
sgRNA1032	537	423	501	466	523	432	483	438	385	261	390	321	376	316	310	246	320
sgRNA1033	604	473	580	622	552	591	510	514	495	319	410	407	412	378	365	329	314
sgRNA1034	455	368	462	475	414	347	422	371	411	276	308	261	280	237	250	228	273
sgRNA1035	251	258	248	382	264	204	305	225	262	177	212	194	187	203	217	145	174
sgRNA1036	777	547	765	771	726	679	706	632	661	381	532	395	494	474	404	301	366
sgRNA1037	428	302	480	455	385	299	401	398	424	283	274	307	279	302	284	228	223
sgRNA1038	671	441	680	621	588	496	601	561	619	356	532	393	333	316	324	291	371
sgRNA1039	336	226	411	343	376	278	272	330	302	269	282	206	174	212	165	185	171
sgRNA1040	742	482	598	712	666	519	663	606	667	386	549	435	472	419	334	384	447
sgRNA1041	397	286	431	430	379	401	434	391	405	223	360	335	262	242	318	261	210
sgRNA1042	414	368	458	453	375	352	390	406	399	235	299	336	296	264	295	286	269
sgRNA1043	505	406	529	556	561	448	498	447	409	319	363	292	376	362	338	264	340
sgRNA1044	541	448	554	523	544	451	546	517	487	356	306	379	418	331	350	287	394
sgRNA1045	774	585	644	747	746	671	710	695	723	491	616	450	520	438	405	386	417
sgRNA1046	1034	704	1063	1104	906	931	924	881	1003	606	780	627	606	609	683	456	593
sgRNA1047	433	286	531	420	589	392	487	449	473	290	418	325	404	288	273	297	294
sgRNA1048	334	253	396	445	433	296	387	378	365	213	234	249	286	229	273	325	248
sgRNA1049	425	300	434	406	412	410	465	491	504	381	410	350	380	301	304	275	308
sgRNA1050	916	630	788	835	779	836	780	677	759	482	569	461	480	507	401	432	449
sgRNA1051	287	150	273	186	302	234	267	204	211	167	205	235	134	167	188	207	147
sgRNA1052	1098	760	970	983	834	850	709	667	630	362	570	463	447	537	464	324	392
sgRNA1053	1141	923	1127	1184	1110	1055	1035	948	852	692	863	712	652	634	525	523	554
sgRNA1054	432	342	344	430	392	384	421	421	382	228	329	309	266	252	155	205	212
sgRNA1055	220	213	215	354	346	293	758	647	935	578	645	1056	1062	1063	868	929	895
sgRNA1056	741	469	617	756	689	626	654	496	667	350	528	528	512	478	390	423	466
sgRNA1057	367	394	445	459	348	376	431	363	418	303	316	238	256	273	317	190	199
sgRNA1058	27	8	8	42	10	16	144	107	230	139	99	444	338	443	551	750	441
sgRNA1059	578	512	483	591	538	511	510	456	427	281	448	324	329	299	207	283	283
sgRNA1060	330	218	234	373	352	302	356	327	402	203	299	316	298	272	291	301	302
sgRNA1061	410	295	324	357	485	278	421	429	431	259	384	382	254	291	245	323	306
sgRNA1062	321	262	330	376	310	279	378	339	396	243	248	296	274	208	240	223	225
sgRNA1063	481	373	363	527	454	351	458	447	380	294	348	331	305	349	220	232	279
sgRNA1064	364	263	283	456	346	308	292	286	312	241	227	222	216	256	132	163	206
sgRNA1065	474	325	372	399	538	319	393	360	373	189	313	250	310	290	185	242	247
sgRNA1066	628	501	557	634	575	540	572	413	498	338	386	352	321	276	273	240	275
sgRNA1067	188	216	249	418	363	256	366	413	477	428	366	435	415	383	401	427	406
sgRNA1068	480	353	407	461	422	336	467	389	345	272	265	317	248	226	275	202	256
sgRNA1069	525	435	661	582	502	450	563	503	589	363	529	403	346	448	230	280	310
sgRNA1070	127	131	86	172	198	174	437	360	537	349	338	927	765	928	891	1025	742
sgRNA1071	117	133	121	162	222	183	304	275	410	165	299	542	403	515	387	452	406
sgRNA1072	279	207	254	234	204	221	217	182	221	143	128	137	88	113	121	136	110
sgRNA1073	536	342	503	438	366	374	417	372	310	191	256	177	131	120	121	141	173
sgRNA1074	900	641	882	740	533	588	509	408	405	254	387	295	178	190	236	179	219
sgRNA1075	328	342	250	204	196	213	87	121	73	62	81	56	27	27	65	57	49
sgRNA1076	411	363	347	326	401	268	372	298	311	213	233	240	252	253	203	182	225
sgRNA1077	159	107	134	144	135	128	180	128	121	88	85	86	90	80	70	58	95
sgRNA1078	477	324	400	500	462	409	486	456	417	330	343	353	309	269	247	224	308
sgRNA1079	334	280	310	301	333	241	365	330	301	225	219	243	243	230	280	216	200
sgRNA1080	456	361	432	547	440	515	463	487	413	327	435	329	334	273	232	249	270
sgRNA1081	432	300	329	339	301	267	358	317	320	201	299	249	318	181	274	188	235
sgRNA1082	565	404	490	422	476	389	470	432	348	297	305	298	374	330	249	243	352
sgRNA1083	470	399	494	503	519	386	484	471	396	299	355	304	318	350	260	261	320
sgRNA1084	312	218	248	313	282	251	321	300	222	161	223	194	172	184	148	164	144
sgRNA1085	395	250	295	366	301	322	331	300	336	229	207	233	215	242	227	189	226
sgRNA1086	102	66	83	114	82	64	124	88	102	53	73	50	74	61	79	71	57
sgRNA1087	203	202	196	215	190	204	222	181	186	111	133	103	159	113	108	101	113
sgRNA1088	341	265	354	288	338	298	360	338	239	191	269	241	238	249	183	177	219
sgRNA1089	780	655	951	836	833	716	831	703	777	519	647	658	536	627	476	457	473
sgRNA1090	836	656	816	797	812	796	825	807	648	440	580	567	461	450	397	375	476
sgRNA1091	403	330	347	407	387	375	453	373	368	221	251	284	295	289	273	206	274
sgRNA1092	354	261	304	395	361	331	396	411	392	224	284	330	417	320	225	240	291
sgRNA1093	325	187	241	187	342	224	314	281	260	143	168	201	240	179	211	164	191
sgRNA1094	180	165	124	184	105	74	216	243	250	185	156	167	136	122	142	195	153
sgRNA1095	412	320	412	381	334	295	286	316	251	178	239	183	203	178	178	130	182
sgRNA1096	606	495	616	475	345	403	246	269	213	181	168	129	170	110	130	149	144
sgRNA1097	476	296	354	325	322	357	298	285	299	158	257	252	204	175	178	161	209
sgRNA1098	581	418	582	628	563	455	477	483	443	315	407	331	326	294	310	316	243
sgRNA1099	361	248	352	366	271	273	285	271	214	196	153	169	221	169	126	131	137
sgRNA1100	420	301	403	408	452	388	404	414	404	233	290	262	299	263	282	218	260
sgRNA1101	438	428	456	424	500	482	498	426	456	267	404	338	359	305	225	240	326
sgRNA1102	622	571	641	661	611	474	751	654	535	478	438	456	477	455	393	396	392
sgRNA1103	439	283	369	421	425	334	410	349	372	243	284	289	327	255	269	199	280
sgRNA1104	295	228	271	317	256	201	320	239	241	183	178	170	188	139	200	131	126
sgRNA1105	347	287	339	328	344	322	367	296	305	224	261	225	253	238	236	219	214
sgRNA1106	845	628	797	913	818	633	707	682	649	491	624	592	535	396	498	415	423
sgRNA1107	502	408	503	535	460	387	429	418	354	218	294	318	213	252	259	184	256
sgRNA1108	469	310	448	526	392	436	462	478	446	313	326	289	327	296	352	235	274
sgRNA1109	419	247	312	315	334	285	288	339	312	237	295	263	231	208	172	170	184
sgRNA1110	470	347	492	484	426	439	460	467	466	360	352	314	364	236	329	249	291
sgRNA1111	442	330	479	421	448	366	477	384	427	279	329	310	309	317	274	215	247
sgRNA1112	360	234	294	357	344	259	264	297	294	196	244	185	205	152	146	167	227
sgRNA1113	210	146	173	211	163	149	217	147	201	105	117	151	139	107	117	107	117
sgRNA1114	367	241	315	364	326	294	363	392	355	205	271	267	280	248	212	260	206
sgRNA1115	579	403	501	563	546	535	490	458	409	315	454	351	384	310	289	242	240
sgRNA1116	421	276	355	349	359	351	364	465	323	225	298	278	268	221	226	163	240
sgRNA1117	852	621	870	903	845	813	723	727	759	463	625	605	531	525	477	398	429
sgRNA1118	815	549	663	770	672	658	735	676	681	449	591	484	515	441	427	398	499
sgRNA1119	422	360	455	540	412	382	485	415	373	280	369	324	278	312	258	274	288
sgRNA1120	359	265	289	384	337	243	378	303	309	106	230	216	214	298	226	177	245
sgRNA1121	53	64	64	101	108	73	287	230	439	275	224	790	740	826	633	788	718
sgRNA1122	354	225	356	403	459	302	503	475	503	346	509	440	481	474	415	408	399
sgRNA1123	264	157	194	282	245	260	253	258	247	182	193	254	271	241	249	156	202
sgRNA1124	228	152	234	252	213	166	227	209	167	138	167	126	126	129	125	141	97
sgRNA1125	264	199	308	381	326	236	403	353	338	162	241	260	267	253	226	154	160
sgRNA1126	351	250	343	316	272	263	329	255	333	214	209	261	184	195	239	166	204
sgRNA1127	269	287	300	592	648	527	718	626	785	465	438	662	558	620	573	547	583
sgRNA1128	97	96	96	88	96	83	93	90	108	61	49	70	46	70	50	44	40
sgRNA1129	619	442	632	667	597	572	623	595	581	295	479	453	422	423	387	331	331
sgRNA1130	471	344	473	357	413	336	463	421	351	237	320	274	267	240	251	155	215
sgRNA1131	87	72	36	115	104	59	336	313	403	278	237	325	445	367	279	318	261
sgRNA1132	85	59	74	119	104	67	346	408	408	267	292	280	434	414	403	349	343
sgRNA1133	432	270	355	323	326	315	342	340	291	217	226	249	218	258	191	204	224
sgRNA1134	608	523	631	735	633	563	714	644	623	459	527	554	518	482	287	279	377
sgRNA1135	329	253	335	350	377	244	399	226	329	175	313	237	235	213	221	187	204
sgRNA1136	489	316	460	402	457	439	405	468	341	287	359	273	246	296	299	227	262
sgRNA1137	853	580	742	708	880	625	732	633	618	457	582	544	570	403	393	397	531
sgRNA1138	697	488	693	693	742	592	643	531	605	270	625	483	444	475	323	370	395
sgRNA1139	618	495	596	567	480	468	382	452	396	244	343	325	275	245	277	206	263
sgRNA1140	540	353	496	547	497	310	610	497	556	270	434	393	363	366	359	269	289
sgRNA1141	301	229	249	340	292	243	251	252	283	223	171	144	167	138	167	127	162
sgRNA1142	728	611	683	803	699	549	331	357	284	201	355	165	167	159	152	175	221
sgRNA1143	264	154	208	258	200	189	259	200	213	126	173	184	112	105	167	122	87
sgRNA1144	768	620	826	792	773	693	842	763	776	431	700	524	527	509	442	473	616
sgRNA1145	450	361	365	440	395	365	385	424	388	277	317	260	263	248	261	207	199
sgRNA1146	708	484	637	696	622	559	760	549	685	345	515	428	437	412	486	470	323
sgRNA1147	358	305	418	412	377	352	378	338	361	204	260	294	210	257	226	191	229
sgRNA1148	570	479	599	716	713	527	576	512	607	430	577	424	427	364	349	341	456
sgRNA1149	343	259	362	331	315	291	333	286	324	201	229	154	203	227	205	224	145
sgRNA1150	537	419	488	558	531	470	532	402	534	281	396	458	334	345	334	281	362
sgRNA1151	340	243	293	390	280	284	322	277	327	194	224	216	233	224	222	200	207
sgRNA1152	445	337	447	445	466	414	446	368	350	237	316	363	280	291	323	308	266
sgRNA1153	470	373	464	486	534	433	449	447	417	291	299	329	290	323	348	239	268
sgRNA1154	640	440	561	722	608	537	617	517	598	332	451	457	397	355	348	314	356
sgRNA1155	441	303	442	432	426	368	384	335	323	256	252	221	285	246	241	160	210
sgRNA1156	447	319	395	442	337	298	345	293	313	182	252	243	274	198	200	129	184
sgRNA1157	336	197	362	263	281	272	325	224	241	154	218	202	275	170	147	139	145
sgRNA1158	283	232	238	285	213	225	270	243	249	162	158	169	207	147	134	196	201
sgRNA1159	241	176	256	200	165	199	188	236	186	147	180	163	158	103	135	121	122
sgRNA1160	673	517	678	732	585	633	646	622	604	458	495	489	430	438	409	389	393
sgRNA1161	203	146	197	158	160	205	248	165	176	94	124	162	137	102	89	123	119
sgRNA1162	358	291	334	407	345	331	393	364	404	224	236	252	266	257	233	166	233
sgRNA1163	272	243	297	282	240	251	305	284	237	193	137	166	165	186	167	149	175
sgRNA1164	349	365	350	386	343	364	358	322	307	226	254	240	294	282	244	205	251
sgRNA1165	695	561	703	815	732	608	689	583	652	442	616	454	531	451	453	367	448
sgRNA1166	235	148	197	179	140	183	215	190	182	84	145	184	159	111	92	131	119
sgRNA1167	680	474	641	752	591	677	522	526	525	329	530	459	308	349	299	300	276
sgRNA1168	516	417	478	526	453	386	394	430	311	278	323	274	260	222	259	250	241
sgRNA1169	214	127	197	280	140	206	186	158	172	105	120	154	114	109	60	108	116
sgRNA1170	563	456	536	554	515	435	485	474	440	269	478	333	272	295	331	189	248
sgRNA1171	213	133	200	175	216	193	191	178	205	144	176	152	113	119	110	131	135
sgRNA1172	274	208	219	265	269	221	302	266	295	231	249	210	205	188	187	172	188
sgRNA1173	196	149	242	281	282	184	218	211	206	135	156	133	143	123	152	145	120
sgRNA1174	505	387	522	466	581	433	462	383	464	262	405	272	348	292	360	272	311
sgRNA1175	633	522	524	650	656	543	503	502	498	306	412	243	278	274	233	193	265
sgRNA1176	57	41	56	62	55	62	82	85	83	70	28	88	87	72	73	67	65
sgRNA1177	321	214	342	358	337	284	464	476	452	288	337	436	482	435	367	375	434
sgRNA1178	431	307	396	535	511	432	654	584	684	414	445	456	620	497	463	371	519
sgRNA1179	302	196	263	385	345	376	483	436	448	265	280	417	504	364	398	326	314
sgRNA1180	475	326	483	444	543	403	501	562	607	307	478	560	542	541	463	392	488
sgRNA1181	240	201	206	222	222	181	150	150	119	101	139	100	107	107	82	118	109
sgRNA1182	465	325	468	450	434	372	369	410	434	257	318	288	340	305	280	287	265
sgRNA1183	221	170	204	185	223	205	165	156	179	159	195	154	217	107	144	97	108
sgRNA1184	315	241	300	365	264	227	267	270	317	210	237	228	225	192	287	194	176
sgRNA1185	165	121	145	145	143	150	123	95	170	87	113	100	66	103	67	68	81
sgRNA1186	269	194	219	231	243	246	213	279	240	148	165	230	175	129	156	125	145
sgRNA1187	309	246	290	327	344	282	344	309	266	132	250	235	199	154	144	151	188
sgRNA1188	419	334	464	491	420	364	454	469	401	329	319	307	271	263	310	246	334
sgRNA1189	427	335	406	612	370	339	439	376	432	241	292	300	316	318	328	260	273
sgRNA1190	606	529	583	527	627	621	555	558	503	397	561	482	457	434	329	340	302
sgRNA1191	274	238	278	303	238	238	285	229	253	153	184	197	158	145	136	119	185
sgRNA1192	475	310	450	449	408	285	447	441	363	215	268	300	365	263	312	239	279
sgRNA1193	493	303	434	438	412	384	485	405	501	362	323	336	316	244	310	253	316
sgRNA1194	411	356	399	449	359	416	426	424	419	322	312	287	382	285	283	263	266
sgRNA1195	554	373	521	612	550	484	497	529	406	290	392	401	338	291	320	345	347
sgRNA1196	414	295	381	396	335	337	411	401	356	191	280	237	266	301	280	227	245
sgRNA1197	401	298	402	440	397	290	425	319	337	259	399	257	233	245	206	164	199
sgRNA1198	509	322	478	560	541	406	424	400	473	263	410	301	278	235	225	207	257
sgRNA1199	292	267	304	381	291	251	280	295	309	183	188	193	223	150	203	155	194
sgRNA1200	966	728	946	986	851	812	909	759	717	478	659	464	508	515	408	343	445
sgRNA1201	796	718	802	750	751	719	710	730	669	455	535	481	456	493	467	376	411
sgRNA1202	693	602	635	796	812	658	872	715	701	434	591	553	567	552	564	427	554
sgRNA1203	300	280	386	342	317	248	300	321	307	249	220	244	228	232	224	168	229
sgRNA1204	344	229	316	284	338	341	328	284	271	205	217	202	215	165	176	153	196
sgRNA1205	948	640	960	928	848	839	879	876	797	608	778	621	577	520	535	510	506
sgRNA1206	221	207	252	213	234	242	205	224	216	164	166	129	164	131	138	115	156
sgRNA1207	622	518	614	634	404	465	525	578	467	324	464	385	384	336	311	256	356
sgRNA1208	290	187	239	288	223	204	293	285	225	166	158	225	185	174	218	177	132
sgRNA1209	465	391	563	524	554	448	460	463	499	304	386	364	276	321	285	246	275
sgRNA1210	440	266	342	441	433	353	390	383	440	261	269	354	358	265	271	237	257
sgRNA1211	490	417	465	502	465	393	487	497	401	311	314	316	326	250	359	232	234
sgRNA1212	398	280	397	307	268	330	341	323	312	208	206	242	222	218	236	191	224
sgRNA1213	371	281	354	443	367	355	322	355	335	273	249	232	282	271	257	154	259
sgRNA1214	254	245	232	277	383	280	213	205	193	182	129	126	148	177	142	156	162
sgRNA1215	301	258	358	316	308	285	266	209	217	142	188	149	142	148	150	90	168
sgRNA1216	1	0	0	2	1	4	5	4	2	10	9	29	7	7	26	28	20
sgRNA1217	353	294	357	347	220	245	377	406	334	216	282	252	236	256	252	134	247
sgRNA1218	426	293	357	419	390	379	324	398	329	200	275	247	291	258	240	174	243
sgRNA1219	17	7	4	10	12	11	40	36	99	35	31	353	322	346	1002	1069	575
sgRNA1220	322	236	296	302	272	278	275	254	234	170	238	235	161	225	125	181	180
sgRNA1221	193	177	225	162	222	159	161	192	166	108	131	166	123	136	144	131	121
sgRNA1222	305	221	294	342	352	236	504	488	596	200	417	441	461	450	338	406	350
sgRNA1223	413	309	422	465	500	360	522	522	595	293	403	511	450	427	397	406	354
sgRNA1224	102	81	101	136	117	91	184	164	173	127	113	72	113	151	104	91	127
sgRNA1225	306	199	290	316	244	222	364	294	253	184	208	217	248	174	185	156	175
sgRNA1226	603	412	660	605	482	472	500	469	583	291	407	301	403	334	256	258	352
sgRNA1227	451	290	437	477	429	331	422	333	333	275	273	277	242	160	230	237	213
sgRNA1228	285	231	177	275	224	275	306	254	304	181	270	193	199	258	150	184	187
sgRNA1229	206	176	224	265	313	308	583	522	595	410	420	697	590	617	445	524	578
sgRNA1230	1075	795	971	1019	1048	830	991	950	1020	548	916	636	685	635	632	660	556
sgRNA1231	248	215	220	264	266	203	242	269	249	133	161	144	151	166	167	88	148
sgRNA1232	241	202	186	236	199	177	182	208	213	155	150	139	152	134	184	100	100
sgRNA1233	471	288	505	576	439	391	530	413	478	291	354	326	358	268	267	251	326
sgRNA1234	195	181	218	202	294	164	232	266	174	142	202	177	177	156	146	97	140
sgRNA1235	441	343	404	419	442	482	473	455	468	309	355	400	328	327	262	270	366
sgRNA1236	21	14	29	39	14	47	40	48	72	75	46	174	146	158	331	454	247
sgRNA1237	54	31	34	36	26	23	89	78	198	81	88	343	248	356	895	988	444
sgRNA1238	17	15	7	20	15	2	29	26	83	39	28	139	97	116	264	273	177
sgRNA1239	898	905	850	838	858	843	410	445	419	219	452	276	300	211	264	223	283
sgRNA1240	143	134	101	96	54	75	58	98	86	43	61	37	40	28	47	49	43
sgRNA1241	553	434	662	635	738	495	540	543	572	397	556	456	437	364	346	295	380
sgRNA1242	323	232	258	288	317	247	270	366	253	205	209	176	191	183	223	151	170
sgRNA1243	737	571	703	694	800	654	703	676	660	427	555	543	515	442	568	303	492
sgRNA1244	544	435	478	545	538	411	587	479	453	285	382	394	337	340	333	331	313
sgRNA1245	152	124	193	170	200	165	205	181	134	102	178	129	132	117	162	145	86
sgRNA1246	442	434	452	444	419	414	408	416	430	288	331	337	354	240	331	268	240
sgRNA1247	478	317	448	343	485	418	349	365	308	190	331	190	179	264	221	123	179
sgRNA1248	407	322	347	399	378	311	329	350	223	182	223	168	262	159	181	183	161
sgRNA1249	169	110	161	179	145	156	131	137	138	74	107	78	94	110	101	82	106
sgRNA1250	611	581	684	675	642	669	639	619	627	397	576	540	522	452	345	313	353
sgRNA1251	544	416	544	516	532	571	456	525	528	281	476	341	308	352	352	180	276
sgRNA1252	84	64	80	93	64	65	78	85	81	40	39	44	36	51	33	28	58
sgRNA1253	747	535	737	758	771	765	680	649	786	518	610	605	554	495	527	419	527
sgRNA1254	747	605	655	771	640	652	666	574	712	462	464	390	543	412	469	347	456
sgRNA1255	461	321	419	431	385	324	451	390	371	204	226	243	242	236	256	243	201
sgRNA1256	555	412	544	540	461	434	485	401	458	312	410	397	235	268	235	214	212
sgRNA1257	28	27	17	12	13	18	85	74	82	71	78	105	63	69	101	160	86
sgRNA1258	15	14	13	5	9	12	53	30	32	14	23	36	27	10	23	27	42
sgRNA1259	664	533	588	583	532	475	577	543	522	333	435	406	365	385	375	329	364
sgRNA1260	324	264	272	271	236	272	326	304	291	172	135	199	206	189	230	164	183
sgRNA1261	630	457	603	608	523	499	624	556	520	284	439	418	431	374	349	341	358
sgRNA1262	858	660	819	891	883	719	887	862	740	568	595	585	635	551	607	524	510
sgRNA1263	674	464	649	667	633	607	588	612	593	344	512	420	417	411	391	317	356
sgRNA1264	49	39	27	31	28	48	114	112	118	80	104	257	207	205	211	183	197
sgRNA1265	840	631	801	790	752	632	801	752	745	387	582	490	560	528	476	411	426
sgRNA1266	205	192	191	207	237	239	209	222	242	164	163	167	195	185	207	178	172
sgRNA1267	762	592	729	691	739	590	742	614	636	392	475	456	399	385	448	373	311
sgRNA1268	785	536	742	840	719	594	710	656	528	338	544	422	413	368	373	293	383
sgRNA1269	423	369	435	474	376	399	487	457	420	263	321	326	340	319	286	240	261
sgRNA1270	239	187	181	256	360	372	570	534	842	394	507	1082	1041	1091	1117	982	974
sgRNA1271	268	237	290	301	462	344	708	585	834	444	476	922	886	899	1057	924	756
sgRNA1272	415	344	420	359	544	489	604	629	752	493	555	861	665	719	754	700	711
sgRNA1273	511	416	561	524	614	544	663	514	545	342	569	699	498	457	565	334	518
sgRNA1274	646	467	666	687	584	446	446	447	428	226	390	334	283	329	273	222	266
sgRNA1275	233	232	268	225	207	248	300	305	248	123	161	223	234	173	177	162	171
sgRNA1276	477	335	451	406	353	401	482	378	421	254	316	291	267	262	265	217	237
sgRNA1277	791	555	762	753	761	652	862	663	726	492	774	553	432	485	487	317	498
sgRNA1278	586	436	536	500	595	551	600	626	716	390	479	516	438	503	392	392	364
sgRNA1279	394	277	387	340	341	333	407	400	406	296	314	294	330	355	305	282	260
sgRNA1280	485	406	479	467	422	450	556	485	438	370	312	370	382	368	370	275	334
sgRNA1281	434	317	380	456	408	344	372	423	435	277	260	278	312	275	313	191	285
sgRNA1282	355	271	389	399	403	320	350	381	279	206	280	217	213	208	245	200	232
sgRNA1283	213	173	230	234	249	214	349	298	345	190	241	261	291	283	261	188	287
sgRNA1284	315	312	344	330	467	372	385	325	389	281	292	281	312	296	324	215	249
sgRNA1285	384	525	415	1587	1969	1201	870	805	1203	664	824	913	770	952	693	742	807
sgRNA1286	541	619	604	1407	2093	1339	1041	931	1187	768	878	1005	873	861	717	760	718
sgRNA1287	458	321	354	384	394	344	392	329	335	252	320	258	342	227	328	212	274
sgRNA1288	330	227	280	316	286	224	306	284	249	203	174	262	272	198	133	141	173
sgRNA1289	400	262	316	438	398	266	326	320	355	131	287	204	286	248	220	255	162
sgRNA1290	16	11	12	37	15	29	100	98	195	142	89	748	563	697	1086	1442	810
sgRNA1291	470	378	574	505	540	466	514	541	479	267	405	319	388	346	259	261	272
sgRNA1292	795	587	671	825	671	653	821	764	782	445	629	561	682	572	495	480	497
sgRNA1293	933	634	899	1013	866	715	833	870	704	441	660	616	554	522	464	476	476
sgRNA1294	815	650	776	855	896	653	745	635	516	348	515	311	353	450	256	263	324
sgRNA1295	751	507	674	790	601	512	485	461	420	229	360	323	356	277	280	235	195
sgRNA1296	687	576	630	676	736	587	703	656	667	461	507	444	459	511	438	440	385
sgRNA1297	97	51	35	143	74	98	509	352	842	459	385	2003	1519	1954	2063	2740	1862
sgRNA1298	74	53	57	171	100	113	539	398	1105	625	558	2354	1897	2509	2516	3129	2295
sgRNA1299	34	24	19	60	69	47	239	180	386	261	232	1024	642	934	970	1262	782
sgRNA1300	85	50	48	85	66	107	377	313	843	481	408	1984	1393	1657	1841	2221	1670
sgRNA1301	311	200	311	350	321	323	282	252	258	188	231	187	177	210	174	134	164
sgRNA1302	157	181	188	229	335	354	723	692	860	657	592	1867	1713	1742	1726	1642	1646
sgRNA1303	496	475	528	636	556	479	513	505	504	352	401	388	435	376	332	338	377
sgRNA1304	638	461	534	641	619	499	614	596	633	291	428	372	423	364	381	254	326
sgRNA1305	838	567	672	804	597	619	529	440	410	232	358	318	259	322	195	249	282
sgRNA1306	450	403	418	445	441	361	373	345	314	235	313	295	257	201	181	164	234
sgRNA1307	30	29	34	20	28	32	87	54	116	63	102	402	306	329	781	1187	568
sgRNA1308	107	145	159	336	249	233	429	321	525	365	373	677	590	705	721	734	470
sgRNA1309	150	121	163	173	142	140	170	184	118	85	106	126	105	99	111	77	61
sgRNA1310	431	323	359	460	432	328	467	371	373	259	303	293	317	256	289	182	246
sgRNA1311	616	457	672	660	661	665	614	584	540	364	494	405	464	382	411	305	360
sgRNA1312	201	185	192	271	237	201	245	271	240	145	184	161	158	143	157	138	157
sgRNA1313	501	383	456	539	580	394	501	477	507	323	394	378	389	378	425	346	284
sgRNA1314	571	462	644	571	562	520	562	538	540	390	482	391	405	338	400	271	374
sgRNA1315	574	420	538	472	403	505	568	468	529	327	341	361	412	285	366	231	324
sgRNA1316	386	258	398	446	368	420	349	331	399	237	320	222	179	209	326	187	173
sgRNA1317	273	220	234	323	247	224	234	243	276	164	245	250	204	242	188	204	220
sgRNA1318	254	161	248	336	271	206	319	251	301	187	218	243	238	238	189	154	249
sgRNA1319	141	112	184	203	151	145	147	149	140	117	113	117	99	118	136	85	98
sgRNA1320	630	470	585	701	700	517	792	650	536	414	490	461	442	350	383	284	335
sgRNA1321	493	376	425	493	429	547	519	457	431	277	346	353	383	265	276	247	307
sgRNA1322	702	475	587	529	587	441	441	457	443	238	420	277	287	304	241	254	303
sgRNA1323	501	388	484	486	367	396	491	456	381	262	321	310	378	314	225	239	234
sgRNA1324	481	370	501	508	660	483	711	644	739	381	486	540	592	554	689	329	498
sgRNA1325	648	482	545	633	865	635	870	733	897	592	625	549	734	665	630	438	612
sgRNA1326	328	275	320	450	360	299	396	400	341	170	276	292	248	238	218	175	230
sgRNA1327	563	441	577	513	562	462	536	519	522	292	343	449	365	353	388	374	368
sgRNA1328	682	504	666	783	643	622	678	562	567	456	539	359	470	447	418	352	343
sgRNA1329	707	462	693	816	762	563	647	619	641	414	576	503	504	486	505	441	457
sgRNA1330	395	278	381	357	350	308	377	301	276	223	223	206	254	206	150	194	183
sgRNA1331	634	487	617	538	555	509	544	580	544	403	405	403	386	372	403	278	376
sgRNA1332	693	461	583	585	630	584	682	492	500	383	547	435	424	360	336	291	394
sgRNA1333	94	116	89	180	162	144	804	583	1173	662	660	3172	2603	3310	3807	4668	3000
sgRNA1334	245	237	278	265	344	241	433	308	298	258	214	236	205	159	154	210	262
sgRNA1335	157	106	140	127	131	92	130	129	107	83	76	88	84	73	109	64	94
sgRNA1336	509	431	490	453	510	448	552	486	484	280	404	365	368	312	370	238	329
sgRNA1337	237	221	303	260	257	249	261	225	250	181	215	190	174	174	175	144	147
sgRNA1338	204	178	201	212	203	200	194	188	190	134	159	165	162	132	165	118	142
sgRNA1339	22	25	28	84	26	49	204	156	318	178	187	959	727	897	887	1122	741
sgRNA1340	28	39	20	49	39	28	138	105	285	104	129	1228	912	898	2919	3696	1663
sgRNA1341	227	164	268	294	333	300	484	455	460	270	387	553	537	570	398	529	432
sgRNA1342	26	8	14	33	25	21	118	75	204	141	129	540	377	483	680	961	554
sgRNA1343	53	27	52	60	43	51	212	130	374	208	225	701	546	569	1027	1309	789
sgRNA1344	37	23	42	67	51	39	66	58	153	68	61	353	305	299	737	904	499
sgRNA1345	56	43	46	64	52	39	287	231	555	308	235	1648	1136	1346	1734	2476	1475
sgRNA1346	894	638	840	892	829	855	733	802	752	489	706	511	530	589	545	415	646
sgRNA1347	681	543	683	629	777	580	671	655	592	479	638	433	516	383	404	308	444
sgRNA1348	766	589	694	754	697	693	702	712	671	481	551	563	508	396	558	374	501
sgRNA1349	539	395	483	526	513	511	515	406	466	300	419	335	285	313	354	282	285
sgRNA1350	645	487	654	667	586	601	669	620	615	466	607	427	404	469	467	312	391
sgRNA1351	641	560	605	734	705	636	647	717	596	375	500	441	584	379	450	426	374
sgRNA1352	366	231	344	404	413	381	363	352	337	214	266	208	260	225	247	166	248
sgRNA1353	391	283	342	405	393	315	443	361	313	231	242	285	288	257	217	187	272
sgRNA1354	447	271	355	431	333	366	413	352	357	209	242	308	286	254	281	204	268
sgRNA1355	394	366	338	384	433	365	390	317	298	200	316	271	252	218	235	212	248
sgRNA1356	202	106	146	161	164	111	159	160	138	90	96	118	119	150	60	94	122
sgRNA1357	98	130	126	213	294	244	472	403	468	276	195	626	603	592	665	634	465
sgRNA1358	497	343	505	444	385	384	478	487	416	188	323	307	258	293	243	230	272
sgRNA1359	583	388	517	567	587	515	647	579	471	363	346	412	361	343	379	267	377
sgRNA1360	39	64	38	127	116	92	267	260	510	356	252	1416	1198	1448	1766	2189	1277
sgRNA1361	485	365	472	464	521	433	536	506	444	265	378	340	388	335	369	283	353
sgRNA1362	221	241	252	253	234	248	256	248	255	177	183	195	182	180	149	115	133
sgRNA1363	517	453	474	429	488	469	316	417	457	325	432	297	290	361	335	296	309
sgRNA1364	516	361	397	468	487	381	441	415	439	272	357	224	379	275	200	235	313
sgRNA1365	313	215	284	382	352	287	337	312	283	190	210	219	220	172	200	163	244
sgRNA1366	122	114	138	97	104	96	126	133	92	98	91	83	66	97	64	71	72
sgRNA1367	380	281	344	340	429	251	418	382	357	177	300	264	269	239	326	249	232
sgRNA1368	562	426	589	600	575	473	597	532	519	362	482	412	354	359	290	341	365
sgRNA1369	370	291	330	453	348	298	390	376	382	227	260	227	218	210	250	190	172
sgRNA1370	700	446	755	735	650	604	764	693	653	402	518	583	562	472	414	415	449
sgRNA1371	312	219	311	332	345	278	325	290	356	168	203	189	229	199	197	181	197
sgRNA1372	439	354	448	619	419	375	462	355	392	252	254	321	265	249	334	228	280
sgRNA1373	461	381	510	459	512	465	486	423	477	318	333	355	306	308	309	211	364
sgRNA1374	767	551	820	780	725	696	772	683	734	468	617	519	537	693	540	490	517
sgRNA1375	722	452	704	705	666	575	673	602	618	377	534	491	355	419	349	407	463
sgRNA1376	698	492	669	698	560	537	614	582	427	265	457	332	362	374	341	212	331
sgRNA1377	749	559	795	679	730	587	746	743	766	430	573	519	385	447	524	341	505
sgRNA1378	715	456	610	669	694	570	577	591	593	360	579	527	423	368	450	324	481
sgRNA1379	213	165	181	234	221	195	245	161	216	139	160	129	165	146	135	116	135
sgRNA1380	358	296	361	327	380	316	320	365	323	223	309	321	317	238	216	209	260
sgRNA1381	295	219	300	297	264	272	315	263	275	176	188	210	208	174	186	166	207
sgRNA1382	616	441	662	620	615	467	608	639	558	400	454	381	419	391	373	291	416
sgRNA1383	277	242	293	353	346	294	306	345	276	178	301	232	252	219	248	153	183
sgRNA1384	593	441	583	594	622	525	640	564	583	343	445	411	383	402	374	292	340
sgRNA1385	830	680	840	833	779	821	817	699	743	506	596	477	473	447	539	422	454
sgRNA1386	376	308	325	385	313	330	387	341	384	207	241	249	267	251	246	153	221
sgRNA1387	686	438	562	563	509	507	605	527	573	309	360	372	462	358	314	301	410
sgRNA1388	283	259	323	272	298	283	355	339	236	168	246	223	241	174	206	185	187
sgRNA1389	302	191	263	280	278	219	248	234	243	119	164	176	161	136	201	134	150
sgRNA1390	658	393	546	732	756	665	791	724	755	448	640	701	515	607	555	383	594
sgRNA1391	394	364	445	522	626	416	661	684	725	320	529	566	689	551	601	441	491
sgRNA1392	290	209	228	228	220	189	225	208	209	160	134	121	158	139	181	135	160
sgRNA1393	499	348	377	474	410	329	480	384	450	253	270	331	306	263	255	276	310
sgRNA1394	211	192	156	229	146	75	348	294	374	185	256	524	485	356	497	511	644
sgRNA1395	323	321	324	394	325	145	446	530	570	291	375	818	770	583	796	542	721
sgRNA1396	172	181	97	220	135	46	243	195	281	170	206	324	253	228	346	275	387
sgRNA1397	394	352	367	372	316	387	321	313	310	168	296	229	202	215	178	133	183
sgRNA1398	469	368	407	480	421	390	479	385	423	320	287	252	393	292	282	262	257
sgRNA1399	162	170	137	399	322	317	783	703	1024	732	656	2307	2113	2507	2516	2922	2117
sgRNA1400	441	312	418	455	386	373	426	379	443	284	295	359	252	302	318	281	283
sgRNA1401	398	336	297	319	377	364	426	376	313	243	282	286	288	294	276	269	258
sgRNA1402	1232	939	1189	1311	1250	1025	1181	1136	1145	736	959	873	842	826	825	548	695
sgRNA1403	169	140	146	198	161	128	175	188	221	123	117	82	111	96	125	109	88
sgRNA1404	485	434	500	535	557	514	521	478	550	300	360	355	302	361	360	256	322
sgRNA1405	405	347	416	472	418	273	324	361	330	193	249	287	301	259	277	211	227
sgRNA1406	788	423	566	753	709	521	683	560	638	358	486	445	411	338	407	317	392
sgRNA1407	345	262	312	306	245	293	310	250	284	198	298	228	232	182	196	165	187
sgRNA1408	609	465	559	707	581	549	678	601	580	381	452	421	430	458	372	333	369
sgRNA1409	798	523	681	700	687	577	630	613	676	384	568	430	361	403	445	430	423
sgRNA1410	292	238	297	291	275	198	294	281	226	130	162	206	190	168	125	194	166
sgRNA1411	772	627	843	782	801	709	721	660	741	435	558	533	477	554	447	418	506
sgRNA1412	387	305	304	361	339	353	326	359	324	183	263	278	263	231	177	204	178
sgRNA1413	631	481	622	704	572	594	603	580	627	391	490	415	355	314	360	340	293
sgRNA1414	459	383	477	353	543	387	515	459	438	268	410	358	340	312	290	247	289
sgRNA1415	525	402	479	465	478	407	372	362	298	230	286	233	219	238	237	183	205
sgRNA1416	245	172	197	239	220	211	206	201	167	161	116	123	158	139	157	91	133
sgRNA1417	360	266	302	392	378	315	376	343	300	223	228	231	234	246	300	184	226
sgRNA1418	368	260	345	304	325	302	353	291	319	226	332	224	182	270	215	214	207
sgRNA1419	233	166	180	237	166	174	204	170	155	97	80	131	110	129	121	101	107
sgRNA1420	480	362	421	505	477	445	384	367	317	203	248	318	258	227	253	198	196
sgRNA1421	608	380	523	682	447	437	406	407	450	298	308	233	181	213	277	181	256
sgRNA1422	511	353	414	453	465	367	432	454	453	175	278	344	340	237	292	231	290
sgRNA1423	315	221	239	293	264	231	276	253	243	198	189	178	185	212	217	168	168
sgRNA1424	367	244	308	322	287	250	261	253	271	183	226	222	175	152	139	189	184
sgRNA1425	524	415	554	513	591	406	537	504	494	313	369	343	337	357	275	235	314
sgRNA1426	420	330	420	414	431	405	443	434	358	287	353	322	325	236	258	271	271
sgRNA1427	608	315	537	575	486	462	524	465	442	299	387	394	330	280	339	216	276
sgRNA1428	414	380	442	448	347	411	375	326	346	260	247	245	211	241	237	219	289
sgRNA1429	546	395	491	503	565	518	542	468	531	344	392	454	397	310	337	329	281
sgRNA1430	379	255	350	346	405	291	387	291	310	224	221	259	258	231	273	231	195
sgRNA1431	416	342	485	483	358	354	413	418	374	242	275	282	313	269	265	237	200
sgRNA1432	43	53	77	42	70	67	87	68	92	43	75	40	51	55	57	47	51
sgRNA1433	720	615	751	877	628	687	720	704	708	474	499	498	446	402	499	425	488
sgRNA1434	259	263	284	251	257	244	322	225	286	186	212	196	204	206	214	188	204
sgRNA1435	315	203	308	346	245	216	269	228	213	129	190	139	141	165	163	167	165
sgRNA1436	463	334	453	485	531	400	515	475	427	297	360	329	405	320	246	257	319
sgRNA1437	893	604	841	903	949	744	911	812	821	541	641	644	618	548	618	418	591
sgRNA1438	316	213	301	348	351	262	359	260	305	188	235	236	282	167	191	176	217
sgRNA1439	265	171	231	249	195	230	221	207	208	153	162	119	138	156	111	136	150
sgRNA1440	650	437	650	694	628	455	652	604	607	355	476	435	403	420	405	317	347
sgRNA1441	443	341	349	418	454	371	387	297	352	255	356	247	277	264	216	170	216
sgRNA1442	278	186	236	308	228	213	277	163	205	140	162	206	198	148	143	147	141
sgRNA1443	325	271	322	472	586	497	981	879	1071	683	753	1756	1536	1703	1644	1214	1369
sgRNA1444	581	419	543	674	558	546	646	509	626	351	422	401	456	440	458	373	410
sgRNA1445	806	536	605	721	669	667	614	671	628	446	659	477	509	441	426	318	366
sgRNA1446	325	219	305	320	309	183	308	226	274	185	163	248	201	224	155	169	158
sgRNA1447	348	299	339	436	525	441	663	598	651	449	489	571	694	580	567	477	516
sgRNA1448	751	484	569	689	682	545	538	688	647	394	542	432	436	427	330	342	444
sgRNA1449	563	454	506	580	444	389	526	466	466	316	353	304	320	338	350	255	275
sgRNA1450	707	677	718	650	760	738	793	850	761	544	666	555	637	564	537	429	608
sgRNA1451	212	168	142	339	425	243	463	522	558	338	319	466	524	549	494	368	525
sgRNA1452	354	296	369	368	355	352	430	357	332	257	295	309	281	252	251	190	208
sgRNA1453	374	317	377	402	397	365	390	301	361	207	315	360	242	261	270	163	239
sgRNA1454	858	537	828	813	763	663	664	694	776	508	622	540	521	520	466	372	415
sgRNA1455	502	420	485	493	426	448	501	391	457	262	376	272	320	287	206	241	294
sgRNA1456	437	330	411	494	486	362	467	421	389	281	289	318	298	274	252	257	271
sgRNA1457	420	313	364	380	374	294	441	374	340	218	281	263	275	292	268	191	260
sgRNA1458	416	332	403	387	406	331	440	379	387	237	308	282	336	216	231	219	279
sgRNA1459	477	409	477	519	459	393	519	499	423	307	315	309	319	322	358	242	327
sgRNA1460	427	329	463	388	410	348	400	407	376	243	328	266	261	262	272	217	259
sgRNA1461	366	251	301	296	319	329	358	342	338	278	233	192	194	281	235	175	187
sgRNA1462	157	172	181	202	159	157	259	194	159	173	121	153	158	138	153	97	145
sgRNA1463	706	470	487	695	613	516	638	530	526	340	410	413	442	412	355	344	377
sgRNA1464	657	467	598	721	702	556	618	509	544	350	419	395	418	444	427	323	301
sgRNA1465	585	490	557	532	490	515	481	527	409	302	406	362	388	351	304	343	383
sgRNA1466	435	305	449	320	454	349	376	329	333	250	300	265	334	278	309	251	249
sgRNA1467	594	502	573	620	924	631	856	935	928	692	844	942	923	803	963	753	785
sgRNA1468	514	379	490	549	458	422	543	426	488	226	407	378	336	268	310	301	273
sgRNA1469	728	518	634	804	636	638	710	542	643	437	535	478	409	443	331	276	424
sgRNA1470	494	348	424	425	449	383	492	446	405	271	312	313	393	305	244	209	296
sgRNA1471	328	207	344	351	373	325	374	369	375	213	287	340	348	273	290	246	298
sgRNA1472	683	543	582	814	781	673	909	861	822	565	654	799	952	697	671	605	701
sgRNA1473	660	526	696	766	648	598	612	616	582	359	486	418	362	333	453	283	361
sgRNA1474	893	674	825	828	854	724	824	770	783	507	656	592	610	534	564	439	525
sgRNA1475	526	375	541	554	576	477	533	549	569	351	416	421	350	398	276	233	300
sgRNA1476	625	412	527	562	586	482	599	455	553	320	406	392	393	343	257	338	348
sgRNA1477	701	576	721	864	764	662	664	747	725	392	588	515	423	521	357	305	418
sgRNA1478	580	447	573	686	677	523	593	527	563	324	432	402	404	416	402	295	406
sgRNA1479	906	761	917	1033	880	847	883	965	837	523	770	627	711	643	530	549	526
sgRNA1480	662	458	573	529	546	517	594	547	535	336	478	357	369	417	362	321	307
sgRNA1481	701	535	700	608	626	630	702	565	621	370	482	466	486	395	352	375	382
sgRNA1482	522	402	485	509	444	424	477	424	440	354	325	275	345	292	263	295	264
sgRNA1483	332	211	272	379	289	251	294	226	255	188	219	204	172	158	176	154	146
sgRNA1484	806	611	914	633	757	608	676	599	605	373	574	398	367	330	409	318	377
sgRNA1485	499	378	592	573	475	431	536	459	479	284	406	357	366	379	257	203	304
sgRNA1486	454	376	422	497	442	420	439	493	457	280	376	404	341	323	395	298	306
sgRNA1487	722	498	734	747	764	604	716	637	611	378	573	585	549	507	481	402	396
sgRNA1488	737	508	626	669	837	611	670	620	551	461	577	476	470	480	369	359	442
sgRNA1489	435	292	349	452	353	282	319	291	313	203	233	207	206	247	231	181	202
sgRNA1490	1105	679	1102	942	1091	892	1022	911	947	615	729	722	627	633	623	498	584
sgRNA1491	515	468	608	620	676	679	616	526	577	381	421	466	441	402	401	338	332
sgRNA1492	281	191	221	259	253	201	252	261	239	134	161	150	171	159	99	126	160
sgRNA1493	318	237	309	330	252	297	319	287	268	151	199	238	168	176	208	181	222
sgRNA1494	218	110	173	147	157	114	143	123	137	77	105	86	91	86	117	93	80
sgRNA1495	525	390	479	514	489	353	527	422	390	276	394	334	351	306	232	233	285
sgRNA1496	241	165	167	196	199	234	215	174	214	154	139	155	145	129	160	133	164
sgRNA1497	373	304	358	412	378	315	378	275	391	232	344	328	321	248	230	191	226
sgRNA1498	262	180	248	266	303	236	315	298	312	254	204	275	328	244	262	186	227
sgRNA1499	212	196	162	234	179	191	177	176	203	123	164	129	153	117	193	116	105

## Sheet: Max_vs_Middle
sgRNA	target_operon_locus_tags	target_operon_names	log2FoldChange	lfcSE	pvalue	padj	significant	normcts_median_FSCMax	normcts_median_FSCMiddle	normcts_median_FSCMin
sgRNA0001	SPV_0001,SPV_0002	dnaA,dnaN	-2.56195	0.192169	4.3642e-16	2.17919e-14	TRUE	20.6028	110.672	435.092
sgRNA0002	SPV_0004	ychF	1.17868	0.199345	0.370062	1	FALSE	368.412	152.529	109.34
sgRNA0003	SPV_0007,SPV_0008	SPV_0007,divIC	2.67833	0.334969	5.43131e-07	8.94077e-06	TRUE	67.3643	8.40464	20.5312
sgRNA0004	SPV_0012	hpt	-2.52133	0.215342	1.60924e-12	5.60615e-11	TRUE	33.3998	185.953	785.432
sgRNA0005	SPV_0024,SPV_2078	purA,ccnC	0.332936	0.217803	1	1	FALSE	266.252	201.581	152.234
sgRNA0006	SPV_0023,SPV_0024,SPV_2078	comW,purA,ccnC	0.0174345	0.0990477	1	1	FALSE	395.951	409.726	363.196
sgRNA0007	SPV_2078	ccnC	0.655631	0.157013	1	1	FALSE	297.617	200.661	137.106
sgRNA0008	SPV_0025,SPV_0026	SPV_0025,scRNA	-0.0708632	0.152789	1	1	FALSE	250.754	266.403	192.56
sgRNA0009	SPV_0026	scRNA	-1.6718	0.127041	1.23615e-07	2.31468e-06	TRUE	147.487	483.267	651.944
sgRNA0010	SPV_0027,SPV_0028,SPV_0029	dut,SPV_0028,radA	0.166997	0.10503	1	1	FALSE	722.967	615.628	612.338
sgRNA0011	SPV_0030,SPV_2079	SPV_0030,prsW	-0.666769	0.235908	1	1	FALSE	218.258	329.882	270.173
sgRNA0012	SPV_0033	prs1	-3.57349	0.361857	1.14472e-12	4.08283e-11	TRUE	3.96589	73.1058	403.975
sgRNA0013	SPV_2081	srf-01	0.140176	0.119983	1	1	FALSE	534.123	476.68	455.262
sgRNA0014	SPV_2082,SPV_0037	SPV_2082,SPV_0037	0.147622	0.104166	1	1	FALSE	310.428	292.061	295.707
sgRNA0015	SPV_0039	SPV_0039	-0.105726	0.110969	1	1	FALSE	385.145	427.092	329.572
sgRNA0016	SPV_0040	yeiH	0.0592219	0.100428	1	1	FALSE	416.983	408.696	360.215
sgRNA0017	SPV_0046	blpU	0.106393	0.119283	1	1	FALSE	472.82	412.648	399.641
sgRNA0018	SPV_0051,SPV_0052,SPV_0053,SPV_0054,SPV_0055,SPV_0056,SPV_0057,SPV_0058,SPV_0059,SPV_0060,SPV_0061,SPV_0062	purC,purL,purF,purM,purN,vanZ,purH,purD,purE,purK,SPV_0061,purB	0.0536253	0.114388	1	1	FALSE	310.825	289.96	303.689
sgRNA0019	SPV_0058,SPV_0059,SPV_0060,SPV_0061,SPV_0062	purD,purE,purK,SPV_0061,purB	-0.0171192	0.0979431	1	1	FALSE	434.06	444.325	391.87
sgRNA0020	SPV_0061,SPV_0062	SPV_0061,purB	-1.63868	0.137983	3.67917e-06	5.19943e-05	TRUE	122.105	377.158	699.774
sgRNA0021	SPV_0064	cpsR	-1.41144	0.128935	0.00141745	0.0134388	TRUE	97.6329	262.596	355.908
sgRNA0022	SPV_0065,SPV_0066,SPV_0067,SPV_0068,SPV_0069,SPV_0070,SPV_0071	bgaC,gadV,gadW,gadE,gadF,agaS,galM	-0.300753	0.102998	1	1	FALSE	301.511	369.377	566.325
sgRNA0023	SPV_0072,SPV_0073	SPV_0072,SPV_0073	0.0911937	0.120976	1	1	FALSE	363.869	344.02	370.913
sgRNA0024	SPV_0073	SPV_0073	0.114454	0.11954	1	1	FALSE	383.123	349.843	356.701
sgRNA0025	SPV_0074	SPV_0074	0.119901	0.124563	1	1	FALSE	287.514	267.984	269.964
sgRNA0026	SPV_0076	SPV_0076	0.183956	0.148921	1	1	FALSE	148.101	150.177	132.417
sgRNA0027	SPV_2092,SPV_0078	SPV_2092,SPV_0078	0.101713	0.0953977	1	1	FALSE	491.979	479.842	470.429
sgRNA0028	SPV_0080	pavB	-0.122047	0.132622	1	1	FALSE	266.801	289.96	268.417
sgRNA0029	SPV_0081,SPV_0082	SPV_0081,SPV_0082	-0.0218717	0.0978286	1	1	FALSE	448.823	475.826	396.33
sgRNA0030	SPV_0083	rpsD	-1.75766	0.284725	0.00779052	0.0670701	FALSE	33.9979	112.412	505.037
sgRNA0031	SPV_0091	SPV_0091	0.0913309	0.112833	1	1	FALSE	331.571	310.972	293.415
sgRNA0032	SPV_0092	SPV_0092	-0.0485997	0.133839	1	1	FALSE	316.171	297.314	305.812
sgRNA0033	SPV_0093,SPV_0094,SPV_0095,SPV_0096	ptvC,ptvB,ptvA,ptvR	0.102194	0.104368	1	1	FALSE	535.869	539.998	526.313
sgRNA0034	SPV_0097	SPV_0097	-0.0148914	0.124106	1	1	FALSE	268.614	258.637	248.049
sgRNA0035	SPV_0098	SPV_0098	0.350067	0.219356	1	1	FALSE	197.139	198.951	48.3386
sgRNA0036	SPV_0099	aatA	0.248015	0.201128	1	1	FALSE	98.1517	68.2877	47.2583
sgRNA0037	SPV_2095,SPV_0101,SPV_0102,SPV_0103	SPV_2095,gph,sdhA,sdhB	0.0651525	0.12802	1	1	FALSE	289.329	269.337	211.952
sgRNA0038	SPV_0104	SPV_0104	0.243717	0.101685	1	1	FALSE	406.51	334.748	288.908
sgRNA0039	SPV_0107,SPV_0108	SPV_0107,SPV_0108	-0.0276591	0.0964114	1	1	FALSE	481.092	496.014	421.748
sgRNA0040	SPV_0112	SPV_0112	0.138681	0.153548	1	1	FALSE	242.136	213.873	273.899
sgRNA0041	SPV_0123,SPV_0124,SPV_2103	SPV_0123,SPV_0124,SPV_2103	0.0269805	0.102431	1	1	FALSE	278.577	267.755	258.087
sgRNA0042	SPV_0119,SPV_0120,SPV_0121,SPV_2102,SPV_0122,SPV_0123,SPV_0124,SPV_2103	SPV_0119,SPV_0120,SPV_0121,SPV_2102,SPV_0122,SPV_0123,SPV_0124,SPV_2103	-0.300071	0.0847886	1	1	FALSE	375.312	466.851	651.481
sgRNA0043	SPV_0126	pspA	0.128781	0.117406	1	1	FALSE	486.189	441.95	429.932
sgRNA0044	SPV_0127,SPV_2107,SPV_0128,SPV_0129	mnmA,srf-04,SPV_0128,mnmG	-2.19017	0.191071	4.69564e-10	1.15313e-08	TRUE	23.1062	117.665	540.087
sgRNA0045	SPV_0128,SPV_0129	SPV_0128,mnmG	-0.458696	0.134243	1	1	FALSE	247.308	333.244	317.975
sgRNA0046	SPV_0131	SPV_0131	1.94447	0.18172	2.02122e-07	3.48537e-06	TRUE	607.791	150.059	81.9581
sgRNA0047	SPV_2109,SPV_0132	cibC,cibB	-0.096936	0.0917613	1	1	FALSE	390.861	452.174	405.038
sgRNA0048	SPV_2109,SPV_0132,SPV_0133	cibC,cibB,cibA	0.101916	0.0949565	1	1	FALSE	440.903	399.561	375.508
sgRNA0049	SPV_0134	SPV_0134	-1.53411	0.192016	0.00540926	0.0485214	TRUE	230.729	662.916	2117.67
sgRNA0050	SPV_2119	srf-05	0.23366	0.135456	1	1	FALSE	210.342	179.056	208.522
sgRNA0051	SPV_0144	mutR1	0.156159	0.100394	1	1	FALSE	315.043	295.213	284.432
sgRNA0052	SPV_2120	srf-06	0.0889584	0.111357	1	1	FALSE	322.447	296.769	277.01
sgRNA0053	SPV_0145,SPV_0146,SPV_0147,SPV_0148	SPV_0145,SPV_0146,SPV_0147,SPV_0148	0.118375	0.108369	1	1	FALSE	238.729	220.622	207.925
sgRNA0054	SPV_0146,SPV_0147,SPV_0148	SPV_0146,SPV_0147,SPV_0148	0.0483511	0.0842425	1	1	FALSE	430.804	428.374	396.213
sgRNA0055	SPV_0147,SPV_0148	SPV_0147,SPV_0148	0.0484653	0.125743	1	1	FALSE	138.815	139.131	137.133
sgRNA0056	SPV_0150	gshT	-0.0539364	0.105346	1	1	FALSE	496.981	528.442	537.781
sgRNA0057	SPV_0151	metQ	-0.221305	0.109767	1	1	FALSE	281.606	332.415	341.417
sgRNA0058	SPV_0153,SPV_0154	metN,metP	-0.777027	0.13975	1	1	FALSE	238.372	405.364	469.162
sgRNA0059	SPV_0155	SPV_0155	0.142442	0.188509	1	1	FALSE	539.016	494.297	497.13
sgRNA0060	SPV_0156,SPV_0157,SPV_0158	SPV_0156,SPV_0157,SPV_0158	0.127911	0.119642	1	1	FALSE	301.426	271.146	291.488
sgRNA0061	SPV_0159	SPV_0159	0.19945	0.137882	1	1	FALSE	283.069	257.808	234.746
sgRNA0062	SPV_0160	nrdI	0.132271	0.1261	1	1	FALSE	312.723	274.467	254.208
sgRNA0063	SPV_0161	SPV_0161	-0.162507	0.129893	1	1	FALSE	286.842	334.073	331.675
sgRNA0064	SPV_0162,SPV_0163	SPV_0162,SPV_0163	-0.0241625	0.084659	1	1	FALSE	724.013	722.53	707.57
sgRNA0065	SPV_0165	hexB	0.0760209	0.121499	1	1	FALSE	499.589	459.246	421.278
sgRNA0066	SPV_0166,SPV_0167,SPV_0168,SPV_0169	ribH,ribB,ribE,ribD	0.244654	0.132238	1	1	FALSE	358.077	321.808	328.231
sgRNA0067	SPV_0170,SPV_0171	ruvA,tag	0.189427	0.115166	1	1	FALSE	309.347	261.66	285.286
sgRNA0068	SPV_0173	SPV_0173	0.00215173	0.138477	1	1	FALSE	252.992	265.797	215.6
sgRNA0069	SPV_0174,SPV_0175	SPV_0174,corA1	-0.74567	0.191276	1	1	FALSE	155.578	243.716	283.874
sgRNA0070	SPV_0176,SPV_0177	uvrA,ypdF	0.170169	0.165525	1	1	FALSE	128.485	111.081	110.308
sgRNA0071	SPV_0178	spxA2	-0.975477	0.118713	1	1	FALSE	232.357	451.786	532.778
sgRNA0072	SPV_0180,SPV_0181,SPV_0182	SPV_0180,yqgF,SPV_0182	-0.93647	0.176149	1	1	FALSE	133.265	279.842	373.955
sgRNA0073	SPV_0184	SPV_0184	-0.188513	0.118822	1	1	FALSE	280.73	324.901	325.733
sgRNA0074	SPV_0185	cls	-0.242824	0.125515	1	1	FALSE	354.104	430.738	538.727
sgRNA0075	SPV_2121,SPV_0186	SPV_2121,SPV_0186	-0.219459	0.120414	1	1	FALSE	229.571	262.782	326.082
sgRNA0076	SPV_0186	SPV_0186	-0.193535	0.0871128	1	1	FALSE	602.708	699.686	993.292
sgRNA0077	SPV_0187,SPV_0188,SPV_0189,SPV_0190,SPV_0191	nrdD,SPV_0188,SPV_0189,nrdG,SPV_0191	0.219895	0.103731	1	1	FALSE	476.376	429.936	457.028
sgRNA0078	SPV_0191	SPV_0191	0.0840696	0.110048	1	1	FALSE	433.051	413.929	384.292
sgRNA0079	SPV_0192,SPV_0193,SPV_0194,SPV_0195,SPV_0196,SPV_0197,SPV_0198,SPV_0199,SPV_0200,SPV_0201,SPV_0202,SPV_0203,SPV_0204,SPV_0205,SPV_0206,SPV_0207,SPV_0208,SPV_0209,SPV_0210,SPV_0211,SPV_0212,SPV_0213	rpsJ,rplC,rplD,rplW,rplB,rpsS,rplV,rpsC,rplP,rpmC,rpsQ,rplN,rplX,rplE,rpsN,rpsH,rplF,rplR,rpsE,rpmD,rplO,secY	-1.60208	0.242727	0.0131211	0.109807	FALSE	29.1003	86.1661	427.96
sgRNA0080	SPV_0193,SPV_0194,SPV_0195,SPV_0196,SPV_0197,SPV_0198,SPV_0199,SPV_0200,SPV_0201,SPV_0202,SPV_0203,SPV_0204,SPV_0205,SPV_0206,SPV_0207,SPV_0208,SPV_0209,SPV_0210,SPV_0211,SPV_0212,SPV_0213	rplC,rplD,rplW,rplB,rpsS,rplV,rpsC,rplP,rpmC,rpsQ,rplN,rplX,rplE,rpsN,rpsH,rplF,rplR,rpsE,rpmD,rplO,secY	-0.114589	0.109844	1	1	FALSE	337.084	357.851	569.046
sgRNA0081	SPV_0201,SPV_0202,SPV_0203,SPV_0204,SPV_0205,SPV_0206,SPV_0207,SPV_0208,SPV_0209,SPV_0210,SPV_0211,SPV_0212,SPV_0213	rpmC,rpsQ,rplN,rplX,rplE,rpsN,rpsH,rplF,rplR,rpsE,rpmD,rplO,secY	-1.87309	0.251299	0.00051217	0.005255	TRUE	40.4211	151.284	601.714
sgRNA0082	SPV_0215,SPV_2122,SPV_0216,SPV_0217,SPV_0218,SPV_0219	infA,rpmJ,rpsM,rpsK,rpoA,rplQ	-2.46825	0.269176	4.90755e-08	9.54742e-07	TRUE	20.132	120.817	289.217
sgRNA0083	SPV_0220,SPV_0221	SPV_0220,SPV_0221	0.0249829	0.108183	1	1	FALSE	330.578	323.296	310.849
sgRNA0084	SPV_2125	ccnE	0.312839	0.112817	1	1	FALSE	436.357	325.783	331.951
sgRNA0085	SPV_0222	gpmB1	0.149724	0.128556	1	1	FALSE	246.211	238.567	205.514
sgRNA0086	SPV_0228,SPV_0229	SPV_0228,SPV_0229	0.240405	0.115748	1	1	FALSE	256.74	225.297	224.624
sgRNA0087	SPV_0238	leuS	-2.08644	0.429362	0.0113947	0.095895	FALSE	3.42605	12.0142	144.088
sgRNA0088	SPV_0239	SPV_0239	0.0975399	0.10864	1	1	FALSE	261.03	243.735	253.282
sgRNA0089	SPV_2129	ccnA	0.219323	0.0955495	1	1	FALSE	348.547	304.668	271.314
sgRNA0090	SPV_2131	srf-07	0.0669623	0.11216	1	1	FALSE	577.931	547.352	536.967
sgRNA0091	SPV_2132	SPV_2132	0.0679798	0.121548	1	1	FALSE	261.47	252.298	250.358
sgRNA0092	SPV_0241	ruvB	0.0584558	0.133689	1	1	FALSE	378.29	358.248	383.098
sgRNA0093	SPV_0243,SPV_0244,SPV_0245,SPV_0246	uppS,cdsA,eep,proS	-2.65209	0.346838	1.90462e-06	2.94136e-05	TRUE	14.8298	99.8051	839.383
sgRNA0094	SPV_0247	bglA	0.25372	0.143717	1	1	FALSE	306.111	296.264	269.112
sgRNA0095	SPV_0248	glmS	-1.77866	0.336341	0.0206079	0.171504	FALSE	19.9942	97.704	56.1681
sgRNA0096	SPV_0249	SPV_0249	0.105553	0.0805324	1	1	FALSE	749.399	686.957	603.44
sgRNA0097	SPV_0250	spuA	-0.0418296	0.110911	1	1	FALSE	243.693	271.937	253.22
sgRNA0098	SPV_0251,SPV_0252	rpsL,rpsG	-1.52737	0.245141	0.0314536	0.246688	FALSE	23.2439	64.8222	249.574
sgRNA0099	SPV_0253	fusA	-1.43368	0.192998	0.0246343	0.197029	FALSE	30.6126	116.614	233.114
sgRNA0100	SPV_0254	polC	-0.897045	0.210156	1	1	FALSE	60.116	139.266	252.021
sgRNA0101	SPV_0255	relB1	-0.274785	0.116195	1	1	FALSE	244.958	301.186	271.708
sgRNA0102	SPV_0260	rsuA-1	0.02196	0.122196	1	1	FALSE	599.679	571.531	548.801
sgRNA0103	SPV_0261	pepC	0.100911	0.0885762	1	1	FALSE	407.546	382.609	379.693
sgRNA0104	SPV_0262,SPV_0263,SPV_0264	manN,manM,manL	-1.37441	0.232858	0.107864	0.765785	FALSE	106.161	260.544	624.315
sgRNA0105	SPV_0265	adhA	0.0377568	0.137977	1	1	FALSE	311.938	273.752	275.174
sgRNA0106	SPV_2134	SPV_2134	0.0989202	0.134326	1	1	FALSE	330.751	297.314	261.98
sgRNA0107	SPV_0266	SPV_0266	0.251144	0.089838	1	1	FALSE	422.931	376.108	365.453
sgRNA0108	SPV_0267	SPV_0267	0.0869566	0.111589	1	1	FALSE	332.811	333.822	303.489
sgRNA0109	SPV_0269	sulA	-0.767725	0.180492	1	1	FALSE	107.71	183.645	287.074
sgRNA0110	SPV_0273	SPV_0273	0.0923564	0.110198	1	1	FALSE	298.408	267.744	284.221
sgRNA0111	SPV_0274,SPV_0275	rplM,rpsI	-2.42992	0.272684	1.57238e-07	2.83787e-06	TRUE	31.7805	168.093	572.283
sgRNA0112	SPV_0279,SPV_0280,SPV_0281,SPV_0282,SPV_0283	celB,celR,celC,SPV_0282,celD	-0.0111856	0.109088	1	1	FALSE	195.817	214.187	179.996
sgRNA0113	SPV_0280,SPV_0281,SPV_0282,SPV_0283	celR,celC,SPV_0282,celD	0.218776	0.133785	1	1	FALSE	235.917	203.953	194.609
sgRNA0114	SPV_0277,SPV_0278,SPV_0279,SPV_0280,SPV_0281,SPV_0282,SPV_0283	celA,SPV_0278,celB,celR,celC,SPV_0282,celD	0.0312374	0.160094	1	1	FALSE	141.531	126.832	124.96
sgRNA0115	SPV_0284	SPV_0284	-0.0915131	0.136035	1	1	FALSE	132.61	135.178	137.933
sgRNA0116	SPV_0286	basA	0.0417785	0.109137	1	1	FALSE	324.852	330.39	324.717
sgRNA0117	SPV_0288,SPV_2140	SPV_0288,SPV_2140	0.17965	0.135226	1	1	FALSE	273.299	241.633	256.936
sgRNA0118	SPV_0289,SPV_0290,SPV_0291,SPV_0292	eda,SPV_0290,SPV_0291,SPV_0292	0.172597	0.0969804	1	1	FALSE	474.101	426.503	426.795
sgRNA0119	SPV_0301	regR	-0.198054	0.0906065	1	1	FALSE	445.103	473.702	493.822
sgRNA0120	SPV_0303	SPV_0303	0.108383	0.111168	1	1	FALSE	536.723	501.977	472.142
sgRNA0121	SPV_0304	mraW	-1.76344	1.16693	0.512963	1	FALSE	0	1.28256	19.1722
sgRNA0122	SPV_0306,SPV_0307	pbp2x,mraY	-0.600986	0.57066	1	1	FALSE	3.70481	7.11463	13.99
sgRNA0123	SPV_0308	clpL	0.274021	0.0987472	1	1	FALSE	519.711	449.803	372.258
sgRNA0124	SPV_0309	luxS	0.106575	0.09874	1	1	FALSE	287.792	263.241	232.96
sgRNA0125	SPV_0310	SPV_0310	0.125286	0.103793	1	1	FALSE	421.891	380.495	403.866
sgRNA0126	SPV_0311,SPV_0313	dexB,SPV_0313	0.0984644	0.0978689	1	1	FALSE	336.844	318.326	311.557
sgRNA0127	SPV_0315,SPV_0316,SPV_0317,SPV_0318,SPV_0319,SPV_0320,SPV_0321,SPV_0322,SPV_0323,SPV_0324,SPV_0325,SPV_0326,SPV_0327,SPV_0328,SPV_0329,SPV_0330	cps2A,cps2B,cps2C,cps2D,cps2E,cps2T,cps2F,cps2G,cps2H,cps2I,cps2J,cps2K,cps2P,cps2L,cps2M,cps2N	1.0389	0.21498	0.856394	1	FALSE	108.016	51.3958	66.8599
sgRNA0128	SPV_0321,SPV_0322,SPV_0323,SPV_0324,SPV_0325,SPV_0326,SPV_0327,SPV_0328,SPV_0329,SPV_0330	cps2F,cps2G,cps2H,cps2I,cps2J,cps2K,cps2P,cps2L,cps2M,cps2N	0.64983	0.131295	1	1	FALSE	406.901	255.73	154.71
sgRNA0129	SPV_0334	aliA	0.0450256	0.0965583	1	1	FALSE	580.967	560.478	513.725
sgRNA0130	SPV_0336,SPV_0337	pbp1a,recU	-3.20714	0.210951	1.28029e-25	1.91788e-23	TRUE	16.7462	184.688	757.043
sgRNA0131	SPV_0338	SPV_0338	-0.188698	0.135803	1	1	FALSE	159.294	187.346	183.527
sgRNA0132	SPV_0339	gpsB	0.982274	0.324191	1	1	FALSE	54.8811	26.087	26.2741
sgRNA0133	SPV_0340	rnpB	-1.70133	0.213204	0.0010038	0.00976421	TRUE	105.439	426.536	1064.6
sgRNA0134	SPV_0343,SPV_0344	gnd,ritR	-4.23649	0.640451	4.33903e-07	7.22207e-06	TRUE	1.60389	48.7372	253.573
sgRNA0135	SPV_0346,SPV_0347,SPV_0348,SPV_0349	mvk,mvaD,mvaK2,fni	-1.28819	0.263098	0.273354	1	FALSE	63.9741	191.491	155.944
sgRNA0136	SPV_0350,SPV_0351,SPV_0352,SPV_2148	vraT,vraS,vraR,alkD	0.141866	0.100223	1	1	FALSE	432.326	402.877	387.132
sgRNA0137	SPV_0355,SPV_0356,SPV_0357	SPV_0355,cbpG,cbpK	0.184235	0.128928	1	1	FALSE	396.636	337.55	303.192
sgRNA0138	SPV_0365	tig	-0.826398	0.144054	1	1	FALSE	123.455	232.939	320.457
sgRNA0139	SPV_0367,SPV_0368	lepB,rnhC	-1.89865	0.180954	6.82966e-07	1.11205e-05	TRUE	88.9015	350.894	758.785
sgRNA0140	SPV_0369,SPV_0370	zapA,zapB	0.636132	0.147123	1	1	FALSE	318.244	211.106	138.548
sgRNA0141	SPV_0372	glyP	-0.939421	0.124408	1	1	FALSE	248.832	538.674	765.205
sgRNA0142	SPV_0373	mip	0.177061	0.106808	1	1	FALSE	409.446	371.376	321.243
sgRNA0143	SPV_0374	shetA	0.0703356	0.118041	1	1	FALSE	207.258	198.951	206.592
sgRNA0144	SPV_0375	serS	-2.97068	0.241286	3.15128e-16	1.6278e-14	TRUE	17.4529	125.019	1051.99
sgRNA0145	SPV_0375,SPV_0376,SPV_0377	serS,manO,lysC	-0.346799	0.104172	1	1	FALSE	329.068	442.667	413.427
sgRNA0146	SPV_0378,SPV_0379,SPV_0380,SPV_0381	fabM,fabT,fabH,acpP	0.330724	0.134604	1	1	FALSE	350.708	270.62	187.484
sgRNA0147	SPV_0379,SPV_0380,SPV_0381	fabT,fabH,acpP	-1.98471	0.250753	8.60089e-05	0.00099877	TRUE	16.0184	69.5106	117.202
sgRNA0148	SPV_0382,SPV_0383,SPV_0384,SPV_0385,SPV_0386,SPV_0387,SPV_0388,SPV_0389,SPV_0390	fabK,fabD,fabG1,fabF,accB,fabZ,accC,accD,accA	-1.48093	0.21416	0.0247273	0.197029	FALSE	68.9945	211.622	362.788
sgRNA0149	SPV_0391,SPV_2157	SPV_0391,ydiL	0.125878	0.135882	1	1	FALSE	358.062	346.691	280.655
sgRNA0150	SPV_0393,SPV_0394,SPV_0395	nusB,SPV_0394,efp	-1.70727	0.115054	7.88438e-10	1.90497e-08	TRUE	107.129	348.994	678.431
sgRNA0151	SPV_0396,SPV_0397,SPV_0398	gatB,gatA,gatC	-2.51232	0.668785	0.0237405	0.192234	FALSE	2.38398	14.0924	166.983
sgRNA0152	SPV_0399	prfC	0.348764	0.13262	1	1	FALSE	291.779	201.438	235.097
sgRNA0153	SPV_0401	rpmB	-0.10027	0.0931574	1	1	FALSE	441.96	479.065	534.809
sgRNA0154	SPV_0402	asp23	-0.138301	0.107108	1	1	FALSE	371.896	402.723	509.689
sgRNA0155	SPV_0404,SPV_0405,SPV_0406,SPV_2159,SPV_0408	ilvB,ilvH,ilvC,SPV_2159,SPV_0408	-0.0332568	0.094979	1	1	FALSE	413.812	417.798	422.492
sgRNA0156	SPV_0409	ilvA	-0.0786095	0.0962186	1	1	FALSE	473.336	513.734	475.589
sgRNA0157	SPV_0410	SPV_0410	-0.800881	0.111759	1	1	FALSE	294.505	509.531	841.832
sgRNA0158	SPV_0411,SPV_0412	glnQ1,glnHP1	0.284479	0.14556	1	1	FALSE	284.79	235.135	191.798
sgRNA0159	SPV_0414	SPV_0414	-0.156458	0.101658	1	1	FALSE	421.092	457.588	486.987
sgRNA0160	SPV_0417	uppP	0.938316	0.227762	1	1	FALSE	424.061	214.702	176.738
sgRNA0161	SPV_0420	pfl	0.0446161	0.13579	1	1	FALSE	191.501	201.581	219.455
sgRNA0162	SPV_0423	xylR	0.0250257	0.121637	1	1	FALSE	224.663	224.649	240.116
sgRNA0163	SPV_0429,SPV_0430	trkH,trkA	-0.276765	0.126271	1	1	FALSE	331.815	432.51	451.328
sgRNA0164	SPV_0431	SPV_0431	-0.0103422	0.104607	1	1	FALSE	307.244	331.586	280.438
sgRNA0165	SPV_0434	mtsB	0.203881	0.165245	1	1	FALSE	170.116	157.042	117.531
sgRNA0166	SPV_2167	srf-09	-1.02875	0.172063	0.867317	1	FALSE	207.607	441.092	672.421
sgRNA0167	SPV_0441	rpoE	-3.21883	0.23855	1.38729e-20	9.89598e-19	TRUE	33.9875	344.664	1856.08
sgRNA0168	SPV_0442	pyrG	0.203123	0.185374	1	1	FALSE	199.44	182.372	168.916
sgRNA0169	SPV_0443	nptA	-1.43525	0.139904	0.00186387	0.0173421	TRUE	168.423	485.716	873.96
sgRNA0170	SPV_0444	endoD	0.130572	0.114483	1	1	FALSE	374.016	360.425	328.362
sgRNA0171	SPV_0445	pgk	-2.30932	0.210199	4.69503e-10	1.15313e-08	TRUE	129.804	604.084	2265.47
sgRNA0172	SPV_0446	SPV_0446	0.39623	0.0975335	1	1	FALSE	511.702	389.898	282.117
sgRNA0173	SPV_0447,SPV_0448	glnR,glnA	1.15145	0.156766	0.334001	1	FALSE	193.214	94.3971	76.1864
sgRNA0174	SPV_0452	creX	0.174781	0.190389	1	1	FALSE	191.314	170.58	185.303
sgRNA0175	SPV_2170,SPV_0454,SPV_0455	hsdS-F,hsdM,hsdR	-0.0170564	0.112587	1	1	FALSE	445.972	469.566	396.806
sgRNA0176	SPV_0458,SPV_0459,SPV_0460,SPV_2171,SPV_0461	hrcA,grpE,dnaK,SPV_2171,dnaJ	-0.395896	0.08551	1	1	FALSE	428.308	563.043	697.197
sgRNA0177	SPV_0462,SPV_0463	SPV_0462,SPV_0463	0.100748	0.109555	1	1	FALSE	341.414	336.03	318.53
sgRNA0178	SPV_0464,SPV_0465	ecsA,ecsB	-0.410008	0.123674	1	1	FALSE	671.034	976.52	1096.66
sgRNA0179	SPV_0466	blpT	0.22436	0.137136	1	1	FALSE	179.247	157.042	162.17
sgRNA0180	SPV_0467,SPV_0468,SPV_0469	blpS,blpR,blpH	0.130343	0.128325	1	1	FALSE	276.516	260.079	219.73
sgRNA0181	SPV_0470,SPV_0471,SPV_0472,SPV_2175	blpC,blpB,blpA,SPV_2175	0.151661	0.0982803	1	1	FALSE	438.239	413.631	367.31
sgRNA0182	SPV_2176,SPV_0473,SPV_0474,SPV_0475	pncW,blpY,blpZ,pncP	0.120819	0.159316	1	1	FALSE	302.605	283.506	325.494
sgRNA0183	SPV_0476,SPV_0477	SPV_0476,trmB	-1.60194	0.138813	1.44891e-05	0.00018711	TRUE	54.8674	177.638	327.224
sgRNA0184	SPV_0478,SPV_0479,SPV_0480,SPV_0481,SPV_0482,SPV_0483	rimP,nusA,SPV_0480,SPV_0481,infB,rbfA	-1.61491	0.179561	0.000615831	0.0061501	TRUE	104.79	304.668	661.203
sgRNA0185	SPV_0487,SPV_0488	SPV_0487,SPV_0488	-0.000918394	0.111776	1	1	FALSE	327.697	343.54	331.73
sgRNA0186	SPV_0490	SPV_0490	0.0247532	0.104091	1	1	FALSE	431.931	418.973	432.122
sgRNA0187	SPV_0495,SPV_0496	SPV_0495,SPV_0496	-0.519255	0.163507	1	1	FALSE	118.652	173.145	240.284
sgRNA0188	SPV_2178,SPV_2179	SPV_2178,SPV_2179	0.134282	0.108001	1	1	FALSE	494.622	470.023	434.587
sgRNA0189	SPV_0500,SPV_2185,SPV_2180	SPV_0500,srf-10,SPV_2180	0.0829164	0.123322	1	1	FALSE	272.841	261.953	314.909
sgRNA0190	SPV_2185	srf-10	-0.0645027	0.130222	1	1	FALSE	216.665	229.623	218.039
sgRNA0191	SPV_0504,SPV_0505	pheS,paiA	-2.48409	0.193864	1.92799e-14	8.25181e-13	TRUE	30.6634	178.599	978.43
sgRNA0192	SPV_0507	SPV_0507	0.230863	0.14256	1	1	FALSE	169.787	151.342	133.59
sgRNA0193	SPV_0510,SPV_0511	metE,metF	0.0349736	0.105616	1	1	FALSE	545.344	558.659	543.198
sgRNA0194	SPV_0512,SPV_0513,SPV_0514,SPV_0515,SPV_0516,SPV_0517	pnp,cysE,SPV_0514,cysS,mrnC,SPV_0517	-2.81765	0.211399	8.0979e-18	5.2742e-16	TRUE	47.5211	305.139	2250.34
sgRNA0195	SPV_0521,SPV_0522,SPV_0523	vex1,vex2,vex3	0.111626	0.137702	1	1	FALSE	195.829	170.58	176.533
sgRNA0196	SPV_0524,SPV_0525	vncR,vncS	0.0445634	0.102857	1	1	FALSE	249.893	246.251	248.249
sgRNA0197	SPV_0526	fba	-3.39375	0.227341	6.3295e-26	1.35451e-23	TRUE	38.6647	492.722	3060.5
sgRNA0198	SPV_0527	SPV_0527	0.023054	0.0766209	1	1	FALSE	634.898	623.381	602.19
sgRNA0199	SPV_0528,SPV_0529,SPV_0530,SPV_0531,SPV_2191	glnP2b,glnP2a,glnH2,glnQ2,SPV_2191	0.189782	0.112723	1	1	FALSE	517.374	435.085	460.407
sgRNA0200	SPV_0532	recJ	0.306719	0.100359	1	1	FALSE	535.441	422.772	410.865
sgRNA0201	SPV_0533	rnjB	2.231	0.184546	2.55033e-11	7.64079e-10	TRUE	375.566	81.423	57.8126
sgRNA0202	SPV_0535,SPV_0536	murM,murN	0.575707	0.164081	1	1	FALSE	364.559	229.986	164.796
sgRNA0203	SPV_0537	SPV_0537	0.206258	0.109685	1	1	FALSE	409.115	363.858	350.99
sgRNA0204	SPV_0538,SPV_0539	uvrC,SPV_0539	0.107469	0.0895007	1	1	FALSE	521.129	505.453	437.285
sgRNA0205	SPV_0540	SPV_0540	0.147194	0.0867033	1	1	FALSE	615.798	573.248	573.586
sgRNA0206	SPV_0541,SPV_0542	nrd,pepV	-0.316438	0.150506	1	1	FALSE	520.553	622.135	693.461
sgRNA0207	SPV_0546	brnQ	-0.0451442	0.0994203	1	1	FALSE	349.287	358.942	365.793
sgRNA0208	SPV_0547,SPV_0548,SPV_0549	SPV_0547,SPV_0548,ldcB	-0.0276375	0.0872059	1	1	FALSE	724.753	754.151	613.115
sgRNA0209	SPV_0550,SPV_0551	rplK,rplA	-1.94286	0.18142	2.02421e-07	3.48537e-06	TRUE	52.0423	179.056	463.56
sgRNA0210	SPV_2193	SPV_2193	0.182481	0.100382	1	1	FALSE	728.924	644.269	630.17
sgRNA0211	SPV_0554	SPV_0554	0.081967	0.109947	1	1	FALSE	463.472	441.092	418.854
sgRNA0212	SPV_0558	prtA	1.4083	0.147797	0.00573469	0.0508317	FALSE	643.846	279.759	191.145
sgRNA0213	SPV_0564	SPV_0564	0.210152	0.155773	1	1	FALSE	324.846	279.361	179.533
sgRNA0214	SPV_0571,SPV_0572,SPV_0573	ccdA-1,SPV_0572,msrAB2	0.154964	0.120859	1	1	FALSE	363.036	358.894	326.752
sgRNA0215	SPV_0574,SPV_0575	yesN,yesM	0.00801996	0.090415	1	1	FALSE	703.384	688.869	570.685
sgRNA0216	SPV_0576	ywlG	0.095168	0.131559	1	1	FALSE	458.056	387.664	338.704
sgRNA0217	SPV_0578	pabB	0.207635	0.0996517	1	1	FALSE	533.34	494.892	452.039
sgRNA0218	SPV_0579	cbpL	-0.0627585	0.101858	1	1	FALSE	357.933	373.298	348.603
sgRNA0219	SPV_0580	gki	-0.136716	0.112623	1	1	FALSE	318.012	331.586	360.587
sgRNA0220	SPV_0581	thyA	-0.409322	0.145429	1	1	FALSE	217.1	307.82	332.708
sgRNA0221	SPV_0582	SPV_0582	-0.409938	0.11897	1	1	FALSE	276.392	360.349	700.9
sgRNA0222	SPV_0583,SPV_0584,SPV_0585,SPV_0586,SPV_0587	miaA,hflX,SPV_0585,rnz,SPV_0587	-2.11732	0.131727	2.21097e-17	1.32481e-15	TRUE	155.517	668.169	1782.32
sgRNA0223	SPV_0588	mtaR	0.491628	0.142832	1	1	FALSE	891.396	613.439	476.863
sgRNA0224	SPV_0589,SPV_0590	SPV_0589,SPV_0590	-0.0745172	0.0850763	1	1	FALSE	771.233	806.846	805.464
sgRNA0225	SPV_0592	rsuA-2	0.301818	0.119011	1	1	FALSE	744.886	633.992	532.087
sgRNA0226	SPV_0593,SPV_0594	typA,SPV_0594	-0.755552	0.111372	1	1	FALSE	223.851	384.454	364.373
sgRNA0227	SPV_0595,SPV_0596,SPV_0597	SPV_0595,SPV_0596,SPV_0597	0.108655	0.110553	1	1	FALSE	465.763	430.04	382.489
sgRNA0228	SPV_0598,SPV_0599	murD,murG	-3.62086	0.976695	0.00728782	0.0634718	FALSE	0.391622	5.14893	7.28345
sgRNA0229	SPV_0610	SPV_0610	0.0558811	0.111187	1	1	FALSE	571.754	546.288	466.017
sgRNA0230	SPV_0608,SPV_0609,SPV_0610	pyrF,pyrE,SPV_0610	0.112305	0.0955818	1	1	FALSE	562.474	505.139	476.86
sgRNA0231	SPV_0615,SPV_0616,SPV_0617,SPV_0618	glnH3,glnQ3,glnP3b,glnP3a	0.127536	0.123605	1	1	FALSE	437.048	391.866	398.223
sgRNA0232	SPV_0620	lysS	-2.77684	0.239004	1.05091e-13	3.94404e-12	TRUE	27.0133	234.279	1538.77
sgRNA0233	SPV_0633,SPV_0634,SPV_0635	copY,cupA,ctpA	0.0980144	0.0931199	1	1	FALSE	326.525	300.119	312.062
sgRNA0234	SPV_0636	spxB	-1.27271	0.154885	0.0782894	0.572086	FALSE	290.237	657.952	1124.31
sgRNA0235	SPV_0641	manA	0.100813	0.168172	1	1	FALSE	141.882	134.669	171.148
sgRNA0236	SPV_0644,SPV_0645	SPV_0644,SPV_0645	0.0395416	0.0936018	1	1	FALSE	662.458	690.231	578.206
sgRNA0237	SPV_0646	SPV_0646	0.337951	0.111569	1	1	FALSE	466.841	385.771	274.974
sgRNA0238	SPV_0647,SPV_0648	SPV_0647,comEB	0.05556	0.114964	1	1	FALSE	265.119	239.532	230.496
sgRNA0239	SPV_0649	upp	-1.36282	0.212076	0.0871193	0.630458	FALSE	301.294	694.248	884.112
sgRNA0240	SPV_0650	clpP	-1.01787	0.152053	0.906425	1	FALSE	311.604	661.8	1330.98
sgRNA0241	SPV_0651	SPV_0651	-0.00279417	0.117827	1	1	FALSE	249.549	266.028	252.944
sgRNA0242	SPV_0652	livJ	0.10689	0.114276	1	1	FALSE	395.408	366.799	337.818
sgRNA0243	SPV_0657	SPV_0657	-0.119447	0.126845	1	1	FALSE	213.601	215.02	199.434
sgRNA0244	SPV_2217	SPV_2217	-1.69969	0.167145	2.83761e-05	0.0003513	TRUE	115.244	381.361	942.996
sgRNA0245	SPV_0661	malT	0.0850485	0.100571	1	1	FALSE	398.559	377.866	335.691
sgRNA0246	SPV_0663	yqfR	-1.66083	0.161596	4.32538e-05	0.000518353	TRUE	54.839	160.474	334.653
sgRNA0247	SPV_0664	metK	-0.477771	0.243575	1	1	FALSE	164.923	208.899	246.187
sgRNA0248	SPV_0665,SPV_0666	pyrDa,holA	-0.048931	0.112865	1	1	FALSE	510.73	502.177	477.663
sgRNA0249	SPV_0667	sodA	-0.402292	0.235379	1	1	FALSE	115.29	145.886	152.213
sgRNA0250	SPV_0668	SPV_0668	0.0358833	0.112988	1	1	FALSE	326.841	330.39	359.451
sgRNA0251	SPV_0672	ppiA	0.191257	0.135505	1	1	FALSE	237.605	227.013	257.165
sgRNA0252	SPV_0673,SPV_2218	SPV_0673,SPV_2218	0.0250201	0.149488	1	1	FALSE	209.711	211.964	251.253
sgRNA0253	SPV_0674,SPV_0675	rpsP,khpA	-1.41362	0.295149	0.161098	1	FALSE	17.6063	39.4751	187.56
sgRNA0254	SPV_2220,SPV_0676	SPV_2220,SPV_0676	-1.42202	0.150815	0.00513732	0.0463597	TRUE	153.572	419.763	968.381
sgRNA0255	SPV_0681	SPV_0681	0.00625124	0.110198	1	1	FALSE	217.347	204.754	233.686
sgRNA0256	SPV_0684	bioY	-0.0893879	0.0781804	1	1	FALSE	614.755	663.171	628.906
sgRNA0257	SPV_0685	gor	0.00289421	0.085769	1	1	FALSE	473.256	463.391	435.218
sgRNA0258	SPV_0686,SPV_0687,SPV_0688	SPV_0686,SPV_0687,SPV_0688	0.0557564	0.124926	1	1	FALSE	264.32	272.727	259.338
sgRNA0259	SPV_0689	metG	-2.66613	0.250065	2.68672e-11	7.89159e-10	TRUE	10.038	61.9842	694.246
sgRNA0260	SPV_0691	SPV_0691	0.230941	0.135725	1	1	FALSE	182.953	160.819	163.95
sgRNA0261	SPV_0693	SPV_0693	0.12239	0.121949	1	1	FALSE	329.39	286.166	266.509
sgRNA0262	SPV_0694,SPV_0695	SPV_0694,fabG2	-0.0363293	0.126031	1	1	FALSE	203.964	198.797	204.336
sgRNA0263	SPV_0698	SPV_0698	0.145081	0.103318	1	1	FALSE	523.502	489.57	481.881
sgRNA0264	SPV_0700	pepN	-0.127633	0.122518	1	1	FALSE	233.922	259.077	251.422
sgRNA0265	SPV_0701,SPV_0702	ciaR,ciaH	-0.475262	0.325173	1	1	FALSE	74.308	106.107	127.561
sgRNA0266	SPV_0703	SPV_0703	0.82205	0.193488	1	1	FALSE	223.364	124.433	99.0448
sgRNA0267	SPV_0704	SPV_0704	0.259002	0.122594	1	1	FALSE	395.414	315.415	326.569
sgRNA0268	SPV_0705	yoaA	-1.69055	0.191314	0.000306774	0.00323625	TRUE	74.5823	264.746	686.648
sgRNA0269	SPV_0708	SPV_0708	-0.220307	0.188013	1	1	FALSE	146.199	187.003	240.904
sgRNA0270	SPV_0710	ezrA	0.732783	0.216585	1	1	FALSE	397.874	244.785	464.981
sgRNA0271	SPV_0714	SPV_0714	0.413491	0.0962456	1	1	FALSE	768.836	565.608	515.366
sgRNA0272	SPV_0717	clpE	0.108075	0.0850159	1	1	FALSE	452.172	444.269	427.649
sgRNA0273	SPV_0718	SPV_0718	0.029807	0.106883	1	1	FALSE	571.771	539.921	509.256
sgRNA0274	SPV_0719,SPV_0720,SPV_0721	glnP4,glnQ4,folD	-0.196026	0.130724	1	1	FALSE	235.097	278.315	290.943
sgRNA0275	SPV_0721	folD	-0.687079	0.312925	1	1	FALSE	398.828	619.842	1131.4
sgRNA0276	SPV_0722	nnrD	-0.0601536	0.13228	1	1	FALSE	255.577	263.611	268.137
sgRNA0277	SPV_0723,SPV_0724,SPV_0725,SPV_0726	rpiA,deoB,SPV_0725,SPV_0726	-0.259966	0.110632	1	1	FALSE	334.088	406.571	476.221
sgRNA0278	SPV_0732	rpsT	-0.347294	0.109918	1	1	FALSE	301.674	384.19	515.373
sgRNA0279	SPV_0733	coaA	0.0285031	0.120708	1	1	FALSE	381.432	387.028	381.466
sgRNA0280	SPV_0735	SPV_0735	-0.0983876	0.132212	1	1	FALSE	840.543	818.68	774.934
sgRNA0281	SPV_0737,SPV_0738,SPV_0739	deoC,cdd-1,SPV_0739	-0.803288	0.220756	1	1	FALSE	129.89	276.326	323.94
sgRNA0282	SPV_0745	plsY	-1.66821	0.194637	0.000596726	0.00599929	TRUE	231.311	709.142	1423.77
sgRNA0283	SPV_0746	parE	-0.166461	0.178753	1	1	FALSE	99.3537	115.851	121.406
sgRNA0284	SPV_0749,SPV_0750,SPV_0751,SPV_0752,SPV_0753	ilvE,SPV_0750,SPV_0751,SPV_0752,pcp1	-0.158606	0.185075	1	1	FALSE	107.137	107.735	115.202
sgRNA0285	SPV_0754,SPV_0755	SPV_0754,tRNA-Tyr-1	-0.304857	0.0984486	1	1	FALSE	324.422	382.202	501.054
sgRNA0286	SPV_0757	rpsA	-3.46298	0.174714	3.95047e-45	5.9178e-42	TRUE	124.392	1348.94	9795.95
sgRNA0287	SPV_0759	SPV_0759	-1.05208	0.170904	0.760578	1	FALSE	55.639	124.345	244.797
sgRNA0288	SPV_0761	SPV_0761	-0.21363	0.132825	1	1	FALSE	281.34	304.348	355.264
sgRNA0289	SPV_0762,SPV_0763,SPV_0764,SPV_0765,SPV_0766	sufC,sufD,sufS,sufE2,sufB	-0.25309	0.086729	1	1	FALSE	503.277	600.709	644.585
sgRNA0290	SPV_0767	pbp3	0.961939	0.0893891	1	1	FALSE	831.779	416.831	388.111
sgRNA0291	SPV_0769	ssrA	-0.204708	0.10385	1	1	FALSE	468.586	523.475	631.614
sgRNA0292	SPV_0770	tRNA-Ser-1	0.195438	0.101066	1	1	FALSE	442.881	391.271	345.066
sgRNA0293	SPV_0771,SPV_0772	fruR,fruB	0.178528	0.110881	1	1	FALSE	724.912	632.46	547.18
sgRNA0294	SPV_0774	ftsK	-0.287592	0.117207	1	1	FALSE	297.718	364.551	505.925
sgRNA0295	SPV_0775	SPV_0775	-0.667032	0.19987	1	1	FALSE	264.376	349.843	347.297
sgRNA0296	SPV_0776,SPV_0777	SPV_0776,thiI	0.0108572	0.0828356	1	1	FALSE	569.256	548.935	454.745
sgRNA0297	SPV_0778,SPV_2238,SPV_0781	SPV_0778,SPV_2238,SPV_0781	0.079571	0.113968	1	1	FALSE	411.273	393.676	402.805
sgRNA0298	SPV_0782,SPV_0783,SPV_0784,SPV_0785	SPV_0782,SPV_0783,SPV_0784,SPV_0785	0.0100811	0.110106	1	1	FALSE	334.541	338.113	341.67
sgRNA0299	SPV_0784,SPV_0785	SPV_0784,SPV_0785	0.0375501	0.0960413	1	1	FALSE	324.939	338.971	286.451
sgRNA0300	SPV_0786,SPV_0787	argR2,pepX	0.0146412	0.11222	1	1	FALSE	509.605	534.631	494.831
sgRNA0301	SPV_0788	dnaE	0.190556	0.0999895	1	1	FALSE	569.622	463.241	501.104
sgRNA0302	SPV_0789,SPV_0790	pfkA,pyk	-2.55563	0.259382	2.00448e-09	4.54957e-08	TRUE	16.8283	104.007	897.521
sgRNA0303	SPV_0790	pyk	-2.92579	0.222525	4.96046e-18	3.37763e-16	TRUE	25.7849	167.589	1666.85
sgRNA0304	SPV_0792,SPV_0793	SPV_0792,SPV_0793	0.186961	0.0946616	1	1	FALSE	406.587	365.218	359.916
sgRNA0305	SPV_0799	SPV_0799	0.136188	0.0914983	1	1	FALSE	407.36	366.812	354.085
sgRNA0306	SPV_0802	tex	-0.127071	0.0886095	1	1	FALSE	311.882	349.407	340.086
sgRNA0307	SPV_0803	SPV_0803	-0.0224762	0.0778876	1	1	FALSE	731.555	762.721	706.732
sgRNA0308	SPV_2245	SPV_2245	0.110298	0.0858266	1	1	FALSE	575.556	538.674	603.997
sgRNA0309	SPV_2246	SPV_2246	-0.114231	0.0881105	1	1	FALSE	334.053	359.567	308.659
sgRNA0310	SPV_2247	srf-13	0.0498999	0.112753	1	1	FALSE	404.535	374.507	382.776
sgRNA0311	SPV_0816	SPV_0816	-0.164347	0.127679	1	1	FALSE	245.408	268.055	269.907
sgRNA0312	SPV_2249,SPV_0817	SPV_2249,SPV_0817	0.0471624	0.12209	1	1	FALSE	602.392	576.285	546.072
sgRNA0313	SPV_0818,SPV_0819	cmbR,lspA	-0.897709	0.195679	1	1	FALSE	265.917	600.709	658.792
sgRNA0314	SPV_0822	proB	-0.0237632	0.0980786	1	1	FALSE	687.36	678.801	607.403
sgRNA0315	SPV_0825	tmk	-1.55565	0.158804	0.000467057	0.00485869	TRUE	44.2121	143.647	268.786
sgRNA0316	SPV_2251,SPV_0832	SPV_2251,SPV_0832	-0.0792765	0.113074	1	1	FALSE	362.715	361.681	304.668
sgRNA0317	SPV_0833	trmFO	-0.259098	0.126204	1	1	FALSE	358.237	377.075	385.841
sgRNA0318	SPV_0834	pyrH	-2.32414	0.239313	3.14663e-08	6.20217e-07	TRUE	15.7883	74.6595	92.0186
sgRNA0319	SPV_0838,SPV_0839,SPV_2252	phoH,SPV_0839,SPV_2252	-0.0186083	0.103826	1	1	FALSE	338.973	347.553	337.931
sgRNA0320	SPV_0842	SPV_0842	0.0864998	0.136088	1	1	FALSE	352.21	350.894	339.975
sgRNA0321	SPV_2256,SPV_2257,SPV_0846	SPV_2256,SPV_2257,SPV_0846	0.162383	0.111985	1	1	FALSE	497.858	460.438	427.331
sgRNA0322	SPV_0843,SPV_0844,SPV_2256,SPV_2257,SPV_0846	comEA,comEC,SPV_2256,SPV_2257,SPV_0846	0.114079	0.106262	1	1	FALSE	449.796	426.088	421.635
sgRNA0323	SPV_2258	srf-14	-1.7273	0.254461	0.00426044	0.0386796	TRUE	19.6138	71.4394	282.261
sgRNA0324	SPV_0851,SPV_0852,SPV_0853	pyrK,pyrDb,lytB	-0.048608	0.117777	1	1	FALSE	371.294	373.913	333.435
sgRNA0325	SPV_0853	lytB	-0.0162993	0.126495	1	1	FALSE	545.315	519.184	514.174
sgRNA0326	SPV_0854	pavA	0.0753697	0.117645	1	1	FALSE	442.884	400	389.359
sgRNA0327	SPV_0855,SPV_0856	ybeY,dgkA	-0.582443	0.142663	1	1	FALSE	175.558	257.808	349.83
sgRNA0328	SPV_0861	secG	0.626792	0.219841	1	1	FALSE	249.046	147.081	104.35
sgRNA0329	SPV_0865	coiA	0.0174123	0.108081	1	1	FALSE	860.966	841.399	778.585
sgRNA0330	SPV_0866,SPV_0867	pepF1,SPV_0867	0.0199568	0.107687	1	1	FALSE	498.401	465.978	467.654
sgRNA0331	SPV_0868	prsA	0.281493	0.0969546	1	1	FALSE	434.61	330.757	370.219
sgRNA0332	SPV_0871,SPV_0872	ebsC,SPV_0872	1.74086	0.158128	2.79685e-06	3.99017e-05	TRUE	448.615	141.753	120.132
sgRNA0333	SPV_0873	SPV_0873	-0.124007	0.0947875	1	1	FALSE	542.504	610.277	810.123
sgRNA0334	SPV_0874,SPV_0875	glmU,SPV_0875	-0.245858	0.22131	1	1	FALSE	216.701	251.089	244.736
sgRNA0335	SPV_0878	orfX	-0.69631	0.208953	1	1	FALSE	57.4627	94.5019	71.5657
sgRNA0336	SPV_0885,SPV_0886	ccdA-2,SPV_0886	0.169912	0.111257	1	1	FALSE	420.137	374.507	366.285
sgRNA0337	SPV_0886	SPV_0886	0.243404	0.11248	1	1	FALSE	288.228	251.439	228.526
sgRNA0338	SPV_0887	yfnA	0.373002	0.106573	1	1	FALSE	304.44	216.36	223.616
sgRNA0339	SPV_0888,SPV_2265	lmb,phtD	0.394911	0.148756	1	1	FALSE	182.813	137.305	124.658
sgRNA0340	SPV_1034,SPV_1033	SPV_1034,SPV_1033	0.10909	0.105432	1	1	FALSE	508.626	471.147	428.1
sgRNA0341	SPV_1032,SPV_1031,SPV_1030	ung,mutX,pyrC	-0.0280672	0.0941191	1	1	FALSE	339.778	344.02	353.604
sgRNA0342	SPV_1028	acoA	-0.487076	0.145929	1	1	FALSE	184.587	298.024	469.643
sgRNA0343	SPV_1023	xerS	-0.021765	0.127731	1	1	FALSE	310.809	316.792	289.977
sgRNA0344	SPV_1020,SPV_1019	rnhB,rbgA	-1.16101	0.125156	0.198276	1	FALSE	149.515	332.964	462.974
sgRNA0345	SPV_1018	zmpA	0.138434	0.097883	1	1	FALSE	484.053	440.234	378.302
sgRNA0346	SPV_1017,SPV_1016,SPV_1015	SPV_1017,rexA,rexB	0.066573	0.101995	1	1	FALSE	347.728	324.383	316.603
sgRNA0347	SPV_1012	eno	-3.42567	0.237335	1.6062e-24	2.00507e-22	TRUE	17.1302	140.778	1686.12
sgRNA0348	SPV_1010	SPV_1010	0.0116054	0.0952207	1	1	FALSE	678.729	675.099	603.998
sgRNA0349	SPV_1008,SPV_1007	glgA,glgD	0.156345	0.118298	1	1	FALSE	338.095	285.164	311.868
sgRNA0350	SPV_1008,SPV_1007,SPV_1006,SPV_1005	glgA,glgD,glgC,glgB	0.0922344	0.171921	1	1	FALSE	141.741	124.408	119.436
sgRNA0351	SPV_1004	gapN	-0.0305013	0.131281	1	1	FALSE	255.342	258.498	255.986
sgRNA0352	SPV_1002,SPV_1001	pulA,ligA	-0.289763	0.101682	1	1	FALSE	295.486	354.15	403.93
sgRNA0353	SPV_1000	SPV_1000	0.0177111	0.0873775	1	1	FALSE	603.061	575.869	527.059
sgRNA0354	SPV_1000,SPV_0999,SPV_0998	SPV_1000,rggD,SPV_0998	-0.0707964	0.116196	1	1	FALSE	340.277	378.446	326.754
sgRNA0355	SPV_0997	hlpA	0.545626	0.193699	1	1	FALSE	120.39	86.2123	67.6575
sgRNA0356	SPV_0996	SPV_0996	-1.37347	0.142598	0.00881814	0.0750544	FALSE	160.114	345.837	610.044
sgRNA0357	SPV_0995	SPV_0995	0.0889813	0.0826164	1	1	FALSE	517.575	465.978	443.335
sgRNA0358	SPV_0994	ribF	-2.54998	0.230284	1.68822e-11	5.16114e-10	TRUE	17.5252	89.5282	295.923
sgRNA0359	SPV_2270	srf-15	-1.34429	0.296549	0.245652	1	FALSE	28.5335	101.322	274.665
sgRNA0360	SPV_0988	SPV_0988	0.0569539	0.107339	1	1	FALSE	405.388	407.115	430.993
sgRNA0361	SPV_0987	SPV_0987	-0.0117441	0.097782	1	1	FALSE	544.972	539.957	463.272
sgRNA0362	SPV_0985,SPV_0984,SPV_0983,SPV_0982	eutD,rluD3,ppnK,SPV_0982	-1.59806	0.270051	0.0267864	0.212307	FALSE	14.1938	40.3162	88.3993
sgRNA0363	SPV_0981	SPV_0981	0.108918	0.134083	1	1	FALSE	497.543	448.222	390.972
sgRNA0364	SPV_0980	prs2	-1.74627	0.170428	1.19332e-05	0.000156807	TRUE	140.168	453.851	1371.48
sgRNA0365	SPV_0976,SPV_0974	rex,SPV_0974	0.620854	0.122285	1	1	FALSE	401.855	274.201	238.299
sgRNA0366	SPV_0975	radC	0.130866	0.125053	1	1	FALSE	310.548	286.166	278.507
sgRNA0367	SPV_0973	pcrA	-0.25086	0.142367	1	1	FALSE	163.073	184.19	157.347
sgRNA0368	SPV_0967	murA-1	1.25216	0.293782	0.390705	1	FALSE	198.404	79.5186	61.7616
sgRNA0369	SPV_0963	SPV_0963	-1.92956	0.134441	4.70275e-12	1.56549e-10	TRUE	54.3088	223.82	434.209
sgRNA0370	SPV_0960	lafB	-1.14719	0.179815	0.413043	1	FALSE	159.636	310.972	489.463
sgRNA0371	SPV_0959,SPV_0958,SPV_0957	SPV_0959,rpoD,dnaG	-1.27483	0.241522	0.255163	1	FALSE	30.5092	74.6595	304.691
sgRNA0372	SPV_0953,SPV_0952	ppc,ftsW	2.85653	0.330936	2.02402e-08	4.1534e-07	TRUE	195.985	24.3686	32.2395
sgRNA0373	SPV_0939	mutR2	0.110574	0.0819271	1	1	FALSE	471.17	440.193	398.498
sgRNA0374	SPV_2285,SPV_0931,SPV_0930	SPV_2285,pezT,pezA	-0.189666	0.120749	1	1	FALSE	256.204	296.769	235.538
sgRNA0375	SPV_2285,SPV_0931,SPV_0930,SPV_2286,SPV_2287,SPV_0928	SPV_2285,pezT,pezA,SPV_2286,SPV_2287,SPV_0928	0.0100322	0.0985225	1	1	FALSE	298.087	284.335	257.656
sgRNA0376	SPV_2285,SPV_0931,SPV_0930,SPV_2286,SPV_2287,SPV_0927	SPV_2285,pezT,pezA,SPV_2286,SPV_2287,nplT	-0.102867	0.0969779	1	1	FALSE	495.862	550.078	489.826
sgRNA0377	SPV_0926	SPV_0926	-0.024336	0.0803175	1	1	FALSE	543.511	533.853	509.824
sgRNA0378	SPV_0923	SPV_0923	0.11887	0.16868	1	1	FALSE	168.283	147.494	157.889
sgRNA0379	SPV_0922,SPV_0921	SPV_0922,ccrB	0.0534781	0.126899	1	1	FALSE	292.655	274.467	222.262
sgRNA0380	SPV_0919,SPV_2288,SPV_0918,SPV_0917,SPV_0916,SPV_0915	SPV_0919,SPV_2288,piaD,piaC,piaB,piaA	0.201474	0.114115	1	1	FALSE	227.4	208.015	192.757
sgRNA0381	SPV_0914	rlmCD	-0.193689	0.097797	1	1	FALSE	422.547	468.553	440.56
sgRNA0382	SPV_0913	SPV_0913	0.0903615	0.152427	1	1	FALSE	98.8335	101.186	79.5609
sgRNA0383	SPV_0904	tdk	-1.3871	0.143694	0.00706251	0.0618693	FALSE	202.04	450.593	1286.08
sgRNA0384	SPV_0903	xylH	-0.0431011	0.0979286	1	1	FALSE	388.802	392.886	355.224
sgRNA0385	SPV_0902	mnmE	-0.567028	0.133452	1	1	FALSE	303.779	471.147	598.202
sgRNA0386	SPV_0901,SPV_0900	dapA,asd	-0.459441	0.116454	1	1	FALSE	337.375	510.672	439.528
sgRNA0387	SPV_2292	srf-17	0.110518	0.0835728	1	1	FALSE	416.41	377.179	387.973
sgRNA0388	SPV_0899	tRNA-Thr-1	0.129581	0.106649	1	1	FALSE	472.829	417.798	403.44
sgRNA0389	SPV_0898	queT	0.0437482	0.0948291	1	1	FALSE	679.5	679.659	606.12
sgRNA0390	SPV_0897	mesH	0.264462	0.096813	1	1	FALSE	712.756	556.522	468.003
sgRNA0391	SPV_0896	mscL	-0.0198473	0.0987452	1	1	FALSE	562.001	577.538	523.71
sgRNA0392	SPV_0895	hemH	0.0246644	0.125583	1	1	FALSE	199.351	203.383	219.923
sgRNA0393	SPV_0894	pepT	0.227016	0.108781	1	1	FALSE	346.592	300.085	298.817
sgRNA0394	SPV_0890	phtE	-0.0385293	0.0957905	1	1	FALSE	615.898	604.999	540.485
sgRNA0395	SPV_1039,SPV_1040	ptsI,ptsH	-3.33219	0.491064	2.04165e-06	3.1208e-05	TRUE	8.20757	72.085	1143.93
sgRNA0396	SPV_1041,SPV_1042,SPV_1043	nrdH,nrdE,nrdF	-0.995882	0.234277	1	1	FALSE	34.5553	56.7313	163.655
sgRNA0397	SPV_1043	nrdF	-0.933981	0.137818	1	1	FALSE	188.647	336.03	397.318
sgRNA0398	SPV_1044	lacR	0.208879	0.10643	1	1	FALSE	423.993	378.209	348.999
sgRNA0399	SPV_2301,SPV_1051,SPV_1052,SPV_1053	lacD,lacC,lacB,lacA	-0.0613767	0.127302	1	1	FALSE	264.181	261.642	232.455
sgRNA0400	SPV_2304,SPV_2306	SPV_2304,SPV_2306	0.103851	0.113941	1	1	FALSE	278.932	255.291	244.765
sgRNA0401	SPV_1060	lepA	-0.0539935	0.12553	1	1	FALSE	252.963	271.937	331.47
sgRNA0402	SPV_1064,SPV_1065	SPV_1064,ispA	-0.0816345	0.115171	1	1	FALSE	471.635	503.558	553.505
sgRNA0403	SPV_1067	xseA	-0.0879241	0.174504	1	1	FALSE	225.453	250.581	311.134
sgRNA0404	SPV_1068	udk	-1.25274	0.320911	0.430942	1	FALSE	199.088	580.971	682.43
sgRNA0405	SPV_2309	SPV_2309	0.243953	0.109867	1	1	FALSE	371.426	320.427	328.204
sgRNA0406	SPV_1072	SPV_1072	0.0265227	0.14873	1	1	FALSE	120.75	125.019	124.227
sgRNA0407	SPV_2310,SPV_1074	SPV_2310,SPV_1074	-0.0219798	0.130765	1	1	FALSE	608.654	599.341	558.502
sgRNA0408	SPV_1075	nirC	0.0271706	0.113538	1	1	FALSE	440.594	435.991	370.191
sgRNA0409	SPV_1077	gyrA	-0.344869	0.211711	1	1	FALSE	204.925	309.204	197.464
sgRNA0410	SPV_1078	ldh	-1.72172	0.174176	3.41873e-05	0.000419776	TRUE	147.8	587.412	1217.97
sgRNA0411	SPV_1079	SPV_1079	-0.0129003	0.14593	1	1	FALSE	216.753	234.783	213.586
sgRNA0412	SPV_1079,SPV_1080	SPV_1079,SPV_1080	-0.0342153	0.0823886	1	1	FALSE	512.035	520.719	466.074
sgRNA0413	SPV_1079,SPV_1080,SPV_1081,SPV_1082	SPV_1079,SPV_1080,relE2,relB2	-0.0440164	0.112761	1	1	FALSE	259.82	243.686	284.196
sgRNA0414	SPV_1083,SPV_1084,SPV_1085	vicX,vicK,vicR	1.84436	0.401989	0.0356883	0.275572	FALSE	285.913	90.3571	34.7529
sgRNA0415	SPV_1083,SPV_1084,SPV_1085,SPV_1086	vicX,vicK,vicR,mutY	0.0392429	0.146919	1	1	FALSE	221.399	213.268	237.636
sgRNA0416	SPV_1087	fhs	-1.49941	0.139539	0.000344865	0.00361264	TRUE	121.575	351.944	471.574
sgRNA0417	SPV_1088,SPV_1089,SPV_1090	coaB,coaC,panT	-0.288597	0.119445	1	1	FALSE	447.36	590.223	488.952
sgRNA0418	SPV_1093	niaR	-0.0483282	0.0859288	1	1	FALSE	504.865	522.138	540.869
sgRNA0419	SPV_1091,SPV_1093	niaX,niaR	0.00234638	0.119955	1	1	FALSE	304.237	302.567	324.974
sgRNA0420	SPV_1096	uvrB	-0.0370472	0.136516	1	1	FALSE	302.619	280.505	276.601
sgRNA0421	SPV_1097	SPV_1097	0.0863249	0.109066	1	1	FALSE	317.134	307.22	283.912
sgRNA0422	SPV_1098,SPV_1099	glnHP5,glnQ5	-2.5993	0.304671	1.52707e-07	2.82414e-06	TRUE	77.961	468.559	2535.39
sgRNA0423	SPV_1100	zwf	-1.03712	0.200215	0.852934	1	FALSE	201.756	448.47	751.869
sgRNA0424	SPV_1105	rnc	-0.271811	0.122119	1	1	FALSE	268.237	306.769	193.873
sgRNA0425	SPV_1106,SPV_1107	tRNA-Arg-1,guaC	0.428096	0.114015	1	1	FALSE	341.291	239.838	222.301
sgRNA0426	SPV_1118	cutC	0.124733	0.121463	1	1	FALSE	571.114	523.284	479.917
sgRNA0427	SPV_1118,SPV_1119	cutC,SPV_1119	0.150572	0.102695	1	1	FALSE	438.352	402.877	378.568
sgRNA0428	SPV_1120	topA	0.597694	0.221164	1	1	FALSE	332.591	204.743	167.554
sgRNA0429	SPV_1121	SPV_1121	0.0614533	0.126461	1	1	FALSE	341.215	341.16	282.843
sgRNA0430	SPV_1122	dprA	0.0433282	0.128639	1	1	FALSE	213.439	223.716	209.925
sgRNA0431	SPV_1123,SPV_1124,SPV_1125,SPV_1126,SPV_1127	licC,licB,licA,tarJ,tarI	-1.88685	0.228974	0.000107445	0.00122865	TRUE	45.2456	174.083	161.034
sgRNA0432	SPV_1128	tacF	-3.03774	0.457652	8.48339e-06	0.000114488	TRUE	19.0035	173.346	190.51
sgRNA0433	SPV_1131,SPV_1132,SPV_1133,SPV_1134	carB,carA,pyrB,pyrR	-0.0504751	0.101094	1	1	FALSE	639.043	658.198	634.663
sgRNA0434	SPV_1136	SPV_1136	0.0361878	0.108731	1	1	FALSE	347.132	366.652	359.993
sgRNA0435	SPV_2315,SPV_2316	SPV_2315,SPV_2316	0.0418355	0.121834	1	1	FALSE	450.868	460.075	474.276
sgRNA0436	SPV_2317	srf-19	0.0272196	0.127764	1	1	FALSE	161.803	170.58	156.599
sgRNA0437	SPV_1138,SPV_1139	htpX,lemA	0.369904	0.119221	1	1	FALSE	323.4	253.947	214.532
sgRNA0438	SPV_1140	rsmG	0.25523	0.122999	1	1	FALSE	387.978	319.376	277.178
sgRNA0439	SPV_1141	uraA	0.0564169	0.117703	1	1	FALSE	489.555	471.127	427.782
sgRNA0440	SPV_1143	SPV_1143	-2.53038	0.198485	1.25519e-14	5.53024e-13	TRUE	25.3838	158.103	417.308
sgRNA0441	SPV_1144	SPV_1144	0.112491	0.0856163	1	1	FALSE	663.144	611.007	613.725
sgRNA0442	SPV_1145,SPV_1146	SPV_1145,yidA	-0.047052	0.114434	1	1	FALSE	335.779	348.165	302.649
sgRNA0443	SPV_1148	rplS	-1.48491	0.281611	0.0850849	0.618725	FALSE	21.8759	63.0348	262.784
sgRNA0444	SPV_1149,SPV_1150,SPV_1151	crcB1,crcB2,SPV_1151	0.0816186	0.097704	1	1	FALSE	550.165	511.741	548.581
sgRNA0445	SPV_1152	fld	-1.28949	0.132603	0.0290262	0.228849	FALSE	290.883	719.134	1249.93
sgRNA0446	SPV_1153	pde2	-0.319372	0.107988	1	1	FALSE	487.133	651.384	771.838
sgRNA0447	SPV_1154	rpmE2	-1.94299	0.211389	8.16073e-06	0.000111134	TRUE	57.4572	263.696	1349.24
sgRNA0448	SPV_1158	gdhA	-0.743155	0.216268	1	1	FALSE	212.216	440.316	595.445
sgRNA0449	SPV_1180,SPV_2327,SPV_1182,SPV_2328,SPV_2329,SPV_1185	SPV_1180,SPV_2327,SPV_1182,SPV_2328,SPV_2329,SPV_1185	0.0274117	0.13098	1	1	FALSE	204.2	192.095	190.696
sgRNA0450	SPV_2330	srf-20	-1.82034	0.433733	0.0585765	0.436555	FALSE	11.3891	38.4767	355.435
sgRNA0451	SPV_1190	trzA	0.480853	0.125104	1	1	FALSE	400.178	283.506	285.426
sgRNA0452	SPV_1193	msrAB1	0.283203	0.136032	1	1	FALSE	221.151	169.057	164.246
sgRNA0453	SPV_1193,SPV_2331,SPV_1194,SPV_1195	msrAB1,SPV_2331,thrB,hom	-0.151087	0.148095	1	1	FALSE	325.457	342.443	318.683
sgRNA0454	SPV_1196	mecA	-0.604049	0.113046	1	1	FALSE	496.564	773.383	1095.75
sgRNA0455	SPV_1197,SPV_1198,SPV_1199,SPV_1200,SPV_1201	tarQ,tarP,cps23FU,SPV_1200,licD3	0.655874	0.307126	1	1	FALSE	139.495	109.26	45.063
sgRNA0456	SPV_1202,SPV_1203,SPV_1204,SPV_1205	psr,pheA,aroK,aroA	0.681816	0.182048	1	1	FALSE	416.825	264.312	111.648
sgRNA0457	SPV_1212	ywbD	-0.226011	0.136103	1	1	FALSE	339.184	404.191	323.57
sgRNA0458	SPV_1213,SPV_1214	SPV_1213,SPV_1214	0.148714	0.120815	1	1	FALSE	323.506	282.214	313.36
sgRNA0459	SPV_1215	amy	0.149012	0.100487	1	1	FALSE	943.803	898.024	865.567
sgRNA0460	SPV_1216,SPV_1217	alaS,SPV_1217	-2.59192	0.229885	4.36357e-12	1.4856e-10	TRUE	29.6164	173.346	1581.32
sgRNA0461	SPV_1218,SPV_1219,SPV_1220,SPV_1221,SPV_1222	potD,potC,potB,potA,murB	-2.25451	1.33207	0.346307	1	FALSE	0	0.790514	5.94145
sgRNA0462	SPV_1224	budA	-0.0545134	0.129295	1	1	FALSE	291.181	290.119	232.306
sgRNA0463	SPV_1226	SPV_1226	0.21683	0.135936	1	1	FALSE	256.53	217.113	201.385
sgRNA0464	SPV_1234,SPV_1235,SPV_1236	SPV_1234,SPV_1235,spxA1	0.217813	0.131383	1	1	FALSE	582.126	504.839	413.927
sgRNA0465	SPV_1238,SPV_1239,SPV_1240	nagD,SPV_1239,hemN	-0.118334	0.12001	1	1	FALSE	753.882	770.817	759.684
sgRNA0466	SPV_1243,SPV_1244	lgt,hprK	0.028044	0.141362	1	1	FALSE	247.135	250.581	275.631
sgRNA0467	SPV_1245	rpsU	1.00769	0.239834	0.974415	1	FALSE	145.92	70.3558	52.8662
sgRNA0468	SPV_1246	nagB	-0.00168112	0.108528	1	1	FALSE	226.596	241.633	268.408
sgRNA0469	SPV_1247	queA	0.0149918	0.0968887	1	1	FALSE	631.935	638.736	600.168
sgRNA0470	SPV_1249,SPV_1250,SPV_1251	SPV_1249,nadE,pncB	-0.546765	0.117391	1	1	FALSE	290.372	457.708	583.253
sgRNA0471	SPV_1258	SPV_1258	0.00890171	0.101743	1	1	FALSE	495.508	503.558	476.26
sgRNA0472	SPV_1259,SPV_1260,SPV_2335	SPV_1259,SPV_1260,SPV_2335	0.12876	0.119119	1	1	FALSE	380.21	358.709	382.057
sgRNA0473	SPV_1262	SPV_1262	-0.00131339	0.0899004	1	1	FALSE	464.228	457.002	467.502
sgRNA0474	SPV_1273	SPV_1273	0.170345	0.0952182	1	1	FALSE	641.305	590.514	548.762
sgRNA0475	SPV_1274	guaA	-0.277269	0.123523	1	1	FALSE	360.873	429.404	394.153
sgRNA0476	SPV_1278	cppA	0.19353	0.154931	1	1	FALSE	186.127	179.056	210.09
sgRNA0477	SPV_1280,SPV_2338	SPV_1280,capA	-0.0402176	0.125377	1	1	FALSE	339.496	361.265	303.501
sgRNA0478	SPV_1285	def1	0.398623	0.127757	1	1	FALSE	402.143	299.256	399.191
sgRNA0479	SPV_1286	trmH	0.225638	0.0889725	1	1	FALSE	885.688	756.035	691.15
sgRNA0480	SPV_1287	trxB	-0.740288	0.128928	1	1	FALSE	301.77	495.874	667.549
sgRNA0481	SPV_1288	SPV_1288	2.36814	0.254076	7.25399e-08	1.39314e-06	TRUE	167.68	30.6717	39.4092
sgRNA0482	SPV_1289,SPV_1290	SPV_1289,SPV_1290	-0.356592	0.126418	1	1	FALSE	180.662	237.154	314.307
sgRNA0483	SPV_1291,SPV_1292,SPV_1293	SPV_1291,ogt,SPV_1293	-0.0121002	0.117379	1	1	FALSE	296.912	321.922	299.595
sgRNA0484	SPV_1294,SPV_1295	SPV_1294,SPV_1295	0.176651	0.10589	1	1	FALSE	558.27	493.785	456.346
sgRNA0485	SPV_1298	nox	0.804084	0.132146	1	1	FALSE	877.817	483.141	342.584
sgRNA0486	SPV_1300,SPV_1301,SPV_1302	apbE,SPV_1301,SPV_1302	0.292258	0.147251	1	1	FALSE	208.866	189.104	175.619
sgRNA0487	SPV_1303,SPV_1304,SPV_1305,SPV_2339,SPV_1307	SPV_1303,glyS,glyQ,SPV_2339,SPV_1307	-2.46161	0.250685	5.52747e-09	1.15002e-07	TRUE	21.1375	114.513	868.427
sgRNA0488	SPV_1308	SPV_1308	-0.0368706	0.10452	1	1	FALSE	218.287	225.73	261.29
sgRNA0489	SPV_1308,SPV_1309	SPV_1308,pgdA	-0.959205	0.112763	1	1	FALSE	203.426	383.399	602.094
sgRNA0490	SPV_1308,SPV_1309,SPV_2340	SPV_1308,pgdA,SPV_2340	-0.043914	0.105862	1	1	FALSE	593.248	610.277	535.967
sgRNA0491	SPV_1311	mocA	0.0557712	0.140139	1	1	FALSE	263.847	244.785	245.364
sgRNA0492	SPV_1318	tuf	-2.11255	0.235782	2.37544e-06	3.48864e-05	TRUE	43.2807	171.245	1381.76
sgRNA0493	SPV_1320	SPV_1320	0.997831	0.138715	1	1	FALSE	639.019	314.625	263.674
sgRNA0494	SPV_1326	pgm	-0.364334	0.141537	1	1	FALSE	434.192	592.985	669.917
sgRNA0495	SPV_1327	bta	2.81818	0.173145	8.55366e-26	1.60167e-23	TRUE	1061.36	153.358	189.949
sgRNA0496	SPV_1328,SPV_1329,SPV_1330	glnH6,glnQ6,glnP6	0.204185	0.113208	1	1	FALSE	410.243	362.056	327.896
sgRNA0497	SPV_1331,SPV_1332	SPV_1331,SPV_1332	0.339568	0.132549	1	1	FALSE	223.7	162.191	190.087
sgRNA0498	SPV_1333	SPV_1333	0.132862	0.0956232	1	1	FALSE	562.472	530.537	535.847
sgRNA0499	SPV_1334,SPV_1335,SPV_1336,SPV_1337,SPV_1338,SPV_1339,SPV_1340,SPV_1341	atpC,atpD,atpG,atpA,atpH,atpF,atpB,atpE	-1.60175	0.164687	0.000258305	0.00278374	TRUE	82.3385	239.838	459.016
sgRNA0500	SPV_1345,SPV_1346	greA,mltG	0.99513	0.124607	1	1	FALSE	617.093	335.135	376.894
sgRNA0501	SPV_1350	SPV_1350	-2.6283	0.717485	0.0232403	0.189206	FALSE	0.935609	5.13023	31.9328
sgRNA0502	SPV_1351	snf	0.257116	0.0781798	1	1	FALSE	770.567	645.85	573.593
sgRNA0503	SPV_1352,SPV_1353	patB2,metB	0.0413053	0.139977	1	1	FALSE	208.391	216.42	215.361
sgRNA0504	SPV_1357	aliB	-1.0159	0.188899	0.932916	1	FALSE	216.19	493.234	622.315
sgRNA0505	SPV_1358	ytgP	-3.26645	0.268581	3.2113e-17	1.71804e-15	TRUE	34.3504	358.248	459.94
sgRNA0506	SPV_1359	murE	-0.656745	0.538402	1	1	FALSE	3.89921	6.63171	13.9188
sgRNA0507	SPV_1360	SPV_1360	0.00692986	0.1132	1	1	FALSE	290.066	286.808	311.736
sgRNA0508	SPV_1363	ppaC	-2.48346	0.203538	3.13745e-13	1.14632e-11	TRUE	43.6072	248.987	2175.12
sgRNA0509	SPV_1364,SPV_1365	SPV_1364,SPV_1365	0.497564	0.114699	1	1	FALSE	686.915	477.471	386.007
sgRNA0510	SPV_1364,SPV_1365,SPV_1366,SPV_1367	SPV_1364,SPV_1365,SPV_1366,SPV_1367	1.8725	0.183856	2.07896e-06	3.14575e-05	TRUE	433.413	121.843	110.932
sgRNA0511	SPV_1368,SPV_1369	rpsR,ssbA	-1.66982	0.156135	1.78696e-05	0.000228792	TRUE	66.207	295.213	519.333
sgRNA0512	SPV_1370	rpsF	-1.54348	0.264781	0.0401146	0.305034	FALSE	31.6332	118.716	211.767
sgRNA0513	SPV_1371	asnC	-2.38981	0.248299	2.17703e-08	4.40702e-07	TRUE	24.9921	134.474	1387.01
sgRNA0514	SPV_1374	SPV_1374	-3.04813	0.312468	5.5755e-11	1.57587e-09	TRUE	6.44959	72.49	664.256
sgRNA0515	SPV_1375	SPV_1375	-0.0180652	0.0877922	1	1	FALSE	551.303	556.807	538.036
sgRNA0516	SPV_1378	yaaA	-0.0139165	0.114476	1	1	FALSE	388.278	393.676	409.624
sgRNA0517	SPV_1379	SPV_1379	0.147587	0.0866489	1	1	FALSE	549.552	500.076	537.828
sgRNA0518	SPV_1379,SPV_1380,SPV_1381	SPV_1379,SPV_1380,def2	0.104686	0.0895961	1	1	FALSE	536.462	522.138	481.569
sgRNA0519	SPV_1382,SPV_1383	SPV_1382,pacL	1.04872	0.119015	0.682294	1	FALSE	329.437	153.385	150.09
sgRNA0520	SPV_1384	mntE	0.0169409	0.100491	1	1	FALSE	279.708	256.917	231.479
sgRNA0521	SPV_1385,SPV_1386,SPV_1387,SPV_1388,SPV_1389	SPV_1385,cca,dapB,SPV_1388,SPV_1389	-1.84621	0.174151	1.17944e-06	1.89979e-05	TRUE	113.376	434.94	1013.11
sgRNA0522	SPV_1390,SPV_1391,SPV_1392	glmM,SPV_1391,disA	1.26461	0.305072	0.385744	1	FALSE	150.617	60.0709	52.0609
sgRNA0523	SPV_1394,SPV_1395,SPV_1396	SPV_1394,SPV_1395,SPV_1396	-0.448583	0.0920285	1	1	FALSE	493.947	691.356	820.51
sgRNA0524	SPV_1401	folA	-1.70465	0.218051	0.00123111	0.0117465	TRUE	22.2341	76.9535	130.187
sgRNA0525	SPV_1402	dpr	-0.339316	0.112935	1	1	FALSE	532.255	723.686	711.102
sgRNA0526	SPV_1403,SPV_1404	lytC,tpiA	-3.02954	0.185065	5.52865e-28	1.65638e-25	TRUE	43.3152	397.119	1820.54
sgRNA0527	SPV_1405,SPV_1406	dnaD,metA	-2.00643	0.252256	6.61556e-05	0.000780324	TRUE	31.3917	135.951	285.841
sgRNA0528	SPV_1407	apt	-0.0262472	0.108541	1	1	FALSE	241.745	243.735	238.655
sgRNA0529	SPV_1408	SPV_1408	0.0349598	0.0910916	1	1	FALSE	570.132	545.787	468.178
sgRNA0530	SPV_1409	msmK	0.131552	0.100151	1	1	FALSE	440.539	411.701	371.726
sgRNA0531	SPV_1410	tRNA-Leu-1	0.0042084	0.122044	1	1	FALSE	342.374	349.843	355.685
sgRNA0532	SPV_1411,SPV_1412	SPV_1411,codY	0.900246	0.118794	1	1	FALSE	963.692	499.605	406.864
sgRNA0533	SPV_1413	cshA	0.206781	0.104391	1	1	FALSE	857.315	746.449	590.92
sgRNA0534	SPV_1415	merA	0.0826589	0.103434	1	1	FALSE	589.149	572.021	504.193
sgRNA0535	SPV_1416,SPV_1417	murT,gatD	-3.03918	0.296562	6.15265e-12	2.00363e-10	TRUE	11.3202	101.906	126.442
sgRNA0536	SPV_1418,SPV_1419	pepQ,SPV_1419	0.0780855	0.0981586	1	1	FALSE	457.827	452.174	374.632
sgRNA0537	SPV_1420,SPV_1421,SPV_2360	SPV_1420,SPV_1421,SPV_2360	0.159475	0.0961359	1	1	FALSE	849.892	747.453	789.381
sgRNA0538	SPV_1422,SPV_1423,SPV_1424	pdxU2,pdxK,truA	-1.60909	0.180541	0.000741678	0.00730944	TRUE	75.3193	233.768	261.239
sgRNA0539	SPV_1427	phnA	0.338657	0.137098	1	1	FALSE	164.062	146.745	126.545
sgRNA0540	SPV_1430	fer	-1.68786	0.201394	0.000636614	0.00631554	TRUE	166.747	504.01	686.123
sgRNA0541	SPV_1429	SPV_1429	-2.03317	0.262211	8.14079e-05	0.000952727	TRUE	20.9612	75.4358	183.852
sgRNA0542	SPV_1431,SPV_1432	gtrB,galE-1	-0.287913	0.227209	1	1	FALSE	97.3684	98.7545	112.265
sgRNA0543	SPV_1435	SPV_1435	-1.48089	0.16281	0.0031397	0.0288544	TRUE	77.5153	237.273	369.001
sgRNA0544	SPV_1436	ctpE	0.635758	0.26007	1	1	FALSE	163.766	122.918	78.1558
sgRNA0545	SPV_1437	plsC	-1.69079	0.234423	0.00321111	0.0293308	TRUE	116.707	467.508	969.454
sgRNA0546	SPV_1438	cadD	0.102391	0.119788	1	1	FALSE	322.006	299.605	295.025
sgRNA0547	SPV_1439	rpsO	-0.0659537	0.102868	1	1	FALSE	423.784	449.012	486.013
sgRNA0548	SPV_2364	SPV_2364	0.433299	0.181002	1	1	FALSE	197.446	165.793	140.826
sgRNA0549	SPV_2365,SPV_1444,SPV_1442	SPV_2365,thrS,SPV_1442	-1.74177	0.323946	0.0220326	0.181345	FALSE	29.5161	121.867	1130.66
sgRNA0550	SPV_1445,SPV_1446	SPV_1445,SPV_1446	0.00456401	0.104942	1	1	FALSE	198.283	196.518	202.375
sgRNA0551	SPV_1447	SPV_1447	-0.0381247	0.104688	1	1	FALSE	543.545	558.722	524.624
sgRNA0552	SPV_2366	SPV_2366	0.142387	0.121271	1	1	FALSE	349.949	320.092	301.151
sgRNA0553	SPV_1448	SPV_1448	0.114346	0.106706	1	1	FALSE	313.795	298.024	307.612
sgRNA0554	SPV_1449	SPV_1449	0.242334	0.104679	1	1	FALSE	492.612	405.364	395.436
sgRNA0555	SPV_1450,SPV_1451	mntR,SPV_1451	-1.10026	0.129852	0.440068	1	FALSE	256.183	537.55	741.634
sgRNA0556	SPV_2369,SPV_2370	SPV_2369,SPV_2370	-0.0746589	0.0933039	1	1	FALSE	315.581	325.241	314.595
sgRNA0557	SPV_1458	relA	-0.471681	0.104324	1	1	FALSE	285.096	421.354	541.832
sgRNA0558	SPV_1459	SPV_1459	0.16106	0.100824	1	1	FALSE	364.695	325.241	351.094
sgRNA0559	SPV_1460	pepO	-0.0708448	0.0906889	1	1	FALSE	410	406.193	448.192
sgRNA0560	SPV_1461,SPV_1462,SPV_1463	psaB,psaC,psaA	-0.139934	0.115794	1	1	FALSE	310.884	338.971	412.163
sgRNA0561	SPV_1464	psaD	0.146215	0.087308	1	1	FALSE	485.252	456.917	464.246
sgRNA0562	SPV_1466	SPV_1466	0.0743491	0.106563	1	1	FALSE	404.026	397.074	350.623
sgRNA0563	SPV_1467	SPV_1467	0.0456147	0.11009	1	1	FALSE	481.046	464.286	441.486
sgRNA0564	SPV_1468	gpmA	-3.11673	0.188149	2.30745e-29	8.64141e-27	TRUE	42.5098	312.022	2288.02
sgRNA0565	SPV_1479,SPV_1480	ftsZ,ftsA	3.30162	0.381956	1.68188e-09	3.87609e-08	TRUE	68.8532	8.28964	6.00157
sgRNA0566	SPV_1481	SPV_1481	0.294574	0.120353	1	1	FALSE	327.385	266.098	209.638
sgRNA0567	SPV_1484	ddl	-3.54741	0.827919	0.00209177	0.0193424	TRUE	0.387369	9.45522	27.8532
sgRNA0568	SPV_1486	pbp2b	-1.8278	0.1952	2.22728e-05	0.000280376	TRUE	75.4295	290.966	637.877
sgRNA0569	SPV_1487	nanR	0.228994	0.0844371	1	1	FALSE	740.121	650.482	546.631
sgRNA0570	SPV_1504,SPV_1505	nanA,SPV_1505	0.095875	0.0869058	1	1	FALSE	475.429	442.688	453.348
sgRNA0571	SPV_1506	axe1	-0.0888927	0.0955184	1	1	FALSE	341.982	357.834	385.465
sgRNA0572	SPV_2378	srf-21	0.00247046	0.109102	1	1	FALSE	374.842	380.163	357.81
sgRNA0573	SPV_1512	secA	0.521828	0.321564	1	1	FALSE	166.77	158.638	54.1844
sgRNA0574	SPV_1518	SPV_1518	0.0077907	0.134784	1	1	FALSE	283.528	280.505	222.469
sgRNA0575	SPV_2382	SPV_2382	-0.0405307	0.105346	1	1	FALSE	274.063	260.87	259.003
sgRNA0576	SPV_1522,SPV_1523	dnaB,nrdR	-2.6351	0.293628	2.56797e-08	5.12909e-07	TRUE	6.59101	41.0419	169.194
sgRNA0577	SPV_1524,SPV_1525,SPV_1526	gntR,SPV_1525,SPV_1526	-0.128227	0.133415	1	1	FALSE	262.956	281.423	258.373
sgRNA0578	SPV_2383,SPV_1527,SPV_1528	srf-22,qsrB,qsrA	0.0783744	0.0950058	1	1	FALSE	436.429	407.85	416.781
sgRNA0579	SPV_1530	SPV_1530	-0.192368	0.0940689	1	1	FALSE	385.645	441.2	452.59
sgRNA0580	SPV_1531	scrK	-0.105767	0.123288	1	1	FALSE	432.12	465.12	493.987
sgRNA0581	SPV_1532	scrA	-0.854027	0.157262	1	1	FALSE	303.547	551.794	865.341
sgRNA0582	SPV_1534,SPV_1535	scrB,scrR	-1.60232	0.16057	0.000176035	0.00195334	TRUE	161.577	513.734	942.081
sgRNA0583	SPV_1536,SPV_1537	mvaA,mvaS	-0.0964725	0.143003	1	1	FALSE	216.615	238.735	212.379
sgRNA0584	SPV_1538	SPV_1538	-0.068884	0.124053	1	1	FALSE	156.346	157.503	142.949
sgRNA0585	SPV_1541	SPV_1541	0.164142	0.0940255	1	1	FALSE	480.034	419.638	383.738
sgRNA0586	SPV_1542,SPV_1543	stkP,phpP	-1.04244	0.182807	0.816436	1	FALSE	316.973	706.278	682.382
sgRNA0587	SPV_1547,SPV_1548	rpoZ,gmk	-2.72486	0.254353	1.19034e-11	3.71486e-10	TRUE	18.7775	126.07	886.957
sgRNA0588	SPV_1549	rny	-0.972609	0.195344	1	1	FALSE	352.249	624.045	1130.55
sgRNA0589	SPV_1550,SPV_1551	yoeB,yefM	-0.467152	0.115841	1	1	FALSE	209.768	287.482	378.584
sgRNA0590	SPV_1555,SPV_1556,SPV_1557,SPV_1558,SPV_1559,SPV_1560,SPV_1561	SPV_1555,yqeK,nadD,SPV_1558,yqeH,SPV_1560,corA2	-1.68834	0.170297	5.29999e-05	0.00063011	TRUE	64.0613	208.015	348.564
sgRNA0591	SPV_1555,SPV_1556,SPV_1557,SPV_1558,SPV_1559,SPV_1560,SPV_1561,SPV_1562	SPV_1555,yqeK,nadD,SPV_1558,yqeH,SPV_1560,corA2,SPV_1562	-0.0159171	0.129521	1	1	FALSE	247.169	254.492	249.074
sgRNA0592	SPV_2388	SPV_2388	-0.277182	0.105487	1	1	FALSE	449.706	529.492	536.164
sgRNA0593	SPV_1565	SPV_1565	0.0462732	0.143285	1	1	FALSE	224.493	203.953	197.04
sgRNA0594	SPV_1566,SPV_1567	SPV_1566,trxA	0.098298	0.110882	1	1	FALSE	467.053	435.206	446.911
sgRNA0595	SPV_1569	aqpZ	0.0381873	0.0893802	1	1	FALSE	616.588	606.324	606.437
sgRNA0596	SPV_1576	SPV_1576	-0.0539759	0.0914714	1	1	FALSE	515.349	536.34	522.902
sgRNA0597	SPV_2391	hicA	0.165493	0.101526	1	1	FALSE	488.9	467.194	443.002
sgRNA0598	SPV_1578,SPV_1579	SPV_1578,SPV_1579	0.0300451	0.115641	1	1	FALSE	243.709	241.142	260.518
sgRNA0599	SPV_1580,SPV_2392,SPV_1581	SPV_1580,ssrS,tRNA-Lys-1	-0.103896	0.0872538	1	1	FALSE	684.039	759.684	645.64
sgRNA0600	SPV_2392,SPV_1581	ssrS,tRNA-Lys-1	-0.118719	0.157867	1	1	FALSE	118.223	137.234	151.925
sgRNA0601	SPV_1582,SPV_1583,SPV_1584,SPV_1585	sacA,SPV_1583,SPV_1584,SPV_1585	0.0345483	0.087405	1	1	FALSE	678.605	656.127	620.447
sgRNA0602	SPV_1586	SPV_1586	-0.0863637	0.0985806	1	1	FALSE	377.502	423.601	421.925
sgRNA0603	SPV_2393,SPV_1588,SPV_1589,SPV_1590,SPV_1591	SPV_2393,SPV_1588,SPV_1589,gls24,SPV_1591	0.0153795	0.119708	1	1	FALSE	392.921	408.696	396.162
sgRNA0604	SPV_1592	SPV_1592	0.0443699	0.103123	1	1	FALSE	579.679	568.364	533.978
sgRNA0605	SPV_1593	cclA	-0.0476652	0.109599	1	1	FALSE	287.97	286.01	282.164
sgRNA0606	SPV_1594,SPV_1595	SPV_1594,SPV_1595	-0.521782	0.116263	1	1	FALSE	223.721	319.98	554.148
sgRNA0607	SPV_1596,SPV_1597,SPV_1598,SPV_1599,SPV_1600,SPV_1601,SPV_1602	trpA,trpB,trpF,trpC,trpD,trpG,trpE	-0.0348252	0.120984	1	1	FALSE	334.757	334.388	319.705
sgRNA0608	SPV_1603	SPV_1603	0.0403913	0.098026	1	1	FALSE	551.916	539.656	468.897
sgRNA0609	SPV_1606,SPV_1607,SPV_1608,SPV_1609,SPV_1610	mgtC,sfuB,SPV_1608,SPV_1609,SPV_1610	0.126688	0.109833	1	1	FALSE	492.408	446.497	387.972
sgRNA0610	SPV_1606,SPV_1607,SPV_1608,SPV_1609,SPV_1610,SPV_1612,SPV_1613,SPV_1614,SPV_2396,SPV_1617	mgtC,sfuB,SPV_1608,SPV_1609,SPV_1610,galE-2,galT-1,phoU3,SPV_2396,pfbA	-0.00759657	0.119271	1	1	FALSE	559.22	543.212	465.606
sgRNA0611	SPV_1619,SPV_1620	aatB,SPV_1620	1.21367	0.175098	0.222347	1	FALSE	783.377	431.788	83.1819
sgRNA0612	SPV_2397,SPV_2398,SPV_1625	SPV_2397,SPV_2398,SPV_1625	-0.00195611	0.21948	1	1	FALSE	395.21	379.259	465.855
sgRNA0613	SPV_1626	exoA	-0.0374931	0.109215	1	1	FALSE	540.999	541.496	531.122
sgRNA0614	SPV_1628,SPV_1629	xpt,pbuX	0.111877	0.0962471	1	1	FALSE	427.747	384.98	339.5
sgRNA0615	SPV_1630,SPV_1631	dpnD,dpnC	-0.0573932	0.110578	1	1	FALSE	360.8	392.1	372.207
sgRNA0616	SPV_1632	paaI	0.0404455	0.131413	1	1	FALSE	235.751	222.262	236.61
sgRNA0617	SPV_1635	galR	0.106811	0.086547	1	1	FALSE	451.435	423.929	416.626
sgRNA0618	SPV_1636,SPV_1637	adhB,nmlR	0.0178911	0.100421	1	1	FALSE	331.746	321.638	295.025
sgRNA0619	SPV_1636,SPV_1637,SPV_1638	adhB,nmlR,czcD	0.0265351	0.13817	1	1	FALSE	312.695	301.186	319.868
sgRNA0620	SPV_1642,SPV_1643,SPV_1644,SPV_1645	proWX,proV,SPV_1644,SPV_1645	0.0920023	0.087222	1	1	FALSE	313.518	309.794	279.572
sgRNA0621	SPV_1646,SPV_1647	SPV_1646,pepA	0.193838	0.0962829	1	1	FALSE	438.582	367.231	330.931
sgRNA0622	SPV_1649,SPV_1650,SPV_1651,SPV_1652	piuB,piuC,piuD,piuA	0.0505144	0.106278	1	1	FALSE	286.618	271.902	233.573
sgRNA0623	SPV_1658,SPV_1659,SPV_1660,SPV_1661	SPV_1658,SPV_1659,rdgB,murI	-0.0411613	0.200564	1	1	FALSE	163.191	181.929	128.52
sgRNA0624	SPV_1662	SPV_1662	0.572156	0.124849	1	1	FALSE	429.266	280.88	170.915
sgRNA0625	SPV_1663	treC	0.288306	0.115583	1	1	FALSE	407.765	324.629	318.621
sgRNA0626	SPV_1665	treR	0.0453039	0.114724	1	1	FALSE	285.601	253.156	254.784
sgRNA0627	SPV_1671	amiA	-2.58216	0.186784	2.44285e-17	1.40746e-15	TRUE	48.534	301.516	1493.41
sgRNA0628	SPV_1672	tacL	1.92781	0.410795	0.0239108	0.192572	FALSE	79.4435	23.1702	35.008
sgRNA0629	SPV_1679,SPV_1680	msmR,birA	-0.0198505	0.100292	1	1	FALSE	286.516	280.617	272.481
sgRNA0630	SPV_1704	rumA-2	0.113744	0.110652	1	1	FALSE	312.084	273.518	278.727
sgRNA0631	SPV_1705	recX	0.0262701	0.0834875	1	1	FALSE	497.478	482.457	460.783
sgRNA0632	SPV_1706	SPV_1706	1.96467	0.205293	2.61422e-06	3.76548e-05	TRUE	317.445	72.9432	69.7208
sgRNA0633	SPV_1709,SPV_1710	groEL,groES	-0.307886	0.111393	1	1	FALSE	496.052	591.269	713.066
sgRNA0634	SPV_1711	ssbB	0.167022	0.135041	1	1	FALSE	470.706	435.573	429.035
sgRNA0635	SPV_1715	SPV_1715	0.0328063	0.096649	1	1	FALSE	312.643	305.503	335.654
sgRNA0636	SPV_1716,SPV_1717,SPV_1718	SPV_1716,SPV_1717,SPV_1718	0.0862788	0.13891	1	1	FALSE	283.771	260.021	265.923
sgRNA0637	SPV_1719,SPV_1720	SPV_1719,SPV_1720	0.0647245	0.0988285	1	1	FALSE	712.877	657.952	570.162
sgRNA0638	SPV_1725	yeeN	-0.351721	0.115646	1	1	FALSE	451.77	583.4	646.854
sgRNA0639	SPV_1726,SPV_1727,SPV_1728,SPV_1729	ply,SPV_1727,SPV_1728,SPV_1729	0.0524826	0.116131	1	1	FALSE	529.935	495.067	493.5
sgRNA0640	SPV_1737	lytA	0.601053	0.153129	1	1	FALSE	407.698	285.766	248.722
sgRNA0641	SPV_1737,SPV_1738	lytA,dinF	0.156206	0.146479	1	1	FALSE	372.069	336.397	260.163
sgRNA0642	SPV_1737,SPV_1738,SPV_1739	lytA,dinF,recA	0.0888487	0.102715	1	1	FALSE	550.289	500.694	470.273
sgRNA0643	SPV_1737,SPV_1738,SPV_1739,SPV_1740	lytA,dinF,recA,cinA	0.298674	0.117331	1	1	FALSE	452.202	387.886	352.18
sgRNA0644	SPV_1741,SPV_1742,SPV_1743	lytR,SPV_1742,tsaE	1.03935	0.151291	0.794789	1	FALSE	296.707	149.182	380.028
sgRNA0645	SPV_1741,SPV_1742,SPV_1743,SPV_1744	lytR,SPV_1742,tsaE,comM	0.0407906	0.0916682	1	1	FALSE	514.441	483.141	449.475
sgRNA0646	SPV_1745	plcR	0.0198268	0.0902309	1	1	FALSE	379.46	368.38	371.14
sgRNA0647	SPV_1746,SPV_1747,SPV_1748,SPV_1749,SPV_1750,SPV_1751,SPV_1752,SPV_1753,SPV_1754,SPV_1755,SPV_2420	SPV_1746,pneA1,pneA2,lanM,wrbA,SPV_1751,clyB,SPV_1753,SPV_1754,SPV_1755,SPV_2420	0.0631376	0.139234	1	1	FALSE	209.758	228.459	205.692
sgRNA0648	SPV_1757	ndk	0.0584942	0.148662	1	1	FALSE	235.892	233.229	211.832
sgRNA0649	SPV_2421	srf-23	-3.71028	0.281872	6.89053e-22	7.37287e-20	TRUE	11.5515	177.548	798.641
sgRNA0650	SPV_1760	tRNA-Cys-1	-2.39842	0.23673	3.4791e-09	7.55318e-08	TRUE	28.4593	189.104	1064.02
sgRNA0651	SPV_1761	hlyX	0.0744795	0.12287	1	1	FALSE	324.626	298.836	267.88
sgRNA0652	SPV_2422	SPV_2422	-1.21323	0.112507	0.0580528	0.434816	FALSE	215.55	441.95	917.198
sgRNA0653	SPV_1765,SPV_1766,SPV_1767	SPV_1765,coaD,SPV_1767	-1.22968	0.115987	0.0476799	0.36073	FALSE	286.348	723.85	1328.86
sgRNA0654	SPV_1768	asnA	-0.41891	0.0935104	1	1	FALSE	271.872	362.142	377.942
sgRNA0655	SPV_1769	SPV_1769	-0.080193	0.117643	1	1	FALSE	380.599	416.205	392.167
sgRNA0656	SPV_1771	yjfA	0.0693295	0.0887771	1	1	FALSE	399.576	396.048	392.716
sgRNA0657	SPV_1772	acyP	0.222941	0.15094	1	1	FALSE	506.748	486.957	479.433
sgRNA0658	SPV_1773	yidC1	-2.21119	0.182731	3.39663e-11	9.7849e-10	TRUE	124.438	631.019	1143.99
sgRNA0659	SPV_1774	pflA	-0.136393	0.11279	1	1	FALSE	264.832	296.271	259.931
sgRNA0660	SPV_1776	purR	-1.1347	0.152312	0.37648	1	FALSE	177.63	392.095	608.911
sgRNA0661	SPV_1777,SPV_1778	yhaM,rmuC	0.156262	0.0889229	1	1	FALSE	564.683	513.734	441.247
sgRNA0662	SPV_1779,SPV_1780,SPV_1781,SPV_1782	SPV_1779,rpe,rsgA,ksgA	-0.892798	0.182362	1	1	FALSE	307.395	641.279	1145.21
sgRNA0663	SPV_1783,SPV_1784,SPV_1785	SPV_1783,SPV_1784,SPV_1785	0.0910464	0.124871	1	1	FALSE	242.23	232.143	199.538
sgRNA0664	SPV_1787,SPV_1788	rnmV,tatD	-0.289071	0.123419	1	1	FALSE	384.696	451.39	669.427
sgRNA0665	SPV_1790	rpmH	-1.09451	0.196987	0.631381	1	FALSE	69.8337	133.597	316.997
sgRNA0666	SPV_1791	SPV_1791	-2.58289	0.415769	0.000140587	0.00158345	TRUE	4.44557	26.8775	33.0658
sgRNA0667	SPV_1792	SPV_1792	-0.132198	0.11596	1	1	FALSE	201.017	222.991	203.222
sgRNA0668	SPV_1793	SPV_1793	-0.154611	0.100111	1	1	FALSE	534.94	580.999	504.952
sgRNA0669	SPV_1794	SPV_1794	-0.020159	0.0831938	1	1	FALSE	639.396	665.658	653.604
sgRNA0670	SPV_1796	SPV_1796	0.279189	0.101028	1	1	FALSE	328.238	268.949	249.743
sgRNA0671	SPV_1797	ccpA	-0.203678	0.116253	1	1	FALSE	334.345	372.956	423.858
sgRNA0672	SPV_1798,SPV_1799,SPV_1800,SPV_1801,SPV_1802,SPV_1803	SPV_1798,SPV_1799,SPV_1800,SPV_1801,SPV_1802,SPV_1803	0.0347142	0.0987923	1	1	FALSE	483.413	437.945	420.606
sgRNA0673	SPV_2423	rpmG2	-0.45017	0.232193	1	1	FALSE	114.753	215.369	159.985
sgRNA0674	SPV_1821	pbp2a	-2.35577	0.197805	7.17777e-12	2.28772e-10	TRUE	108.124	592.527	1568.71
sgRNA0675	SPV_1822	rluD2	0.13808	0.136003	1	1	FALSE	562.515	525.692	521.289
sgRNA0676	SPV_1823	gap	-3.52269	0.189832	2.67823e-40	2.00599e-37	TRUE	27.015	308.871	2384.63
sgRNA0677	SPV_1824	SPV_1824	0.039152	0.099808	1	1	FALSE	520.63	502.763	449.476
sgRNA0678	SPV_1827,SPV_2426	SPV_1827,SPV_2426	0.0924644	0.120029	1	1	FALSE	297.051	281.848	298.877
sgRNA0679	SPV_1829	bguR	-0.097072	0.138709	1	1	FALSE	294.529	316.792	259.612
sgRNA0680	SPV_1830,SPV_1831,SPV_1832,SPV_1833	bguA,bguD,bguB,bguC	0.0658802	0.0747308	1	1	FALSE	620.305	598.955	585.766
sgRNA0681	SPV_1834	adhE	-0.76333	0.214373	1	1	FALSE	321.574	536.846	764.407
sgRNA0682	SPV_1838	yajC	-0.0753012	0.113589	1	1	FALSE	295.857	306.361	333.958
sgRNA0683	SPV_1838,SPV_1839	yajC,ulaH	-0.481552	0.107163	1	1	FALSE	297.281	398.419	542.183
sgRNA0684	SPV_1840,SPV_1841	ulaG,ulaR	0.240953	0.0987335	1	1	FALSE	524.293	430.04	463.197
sgRNA0685	SPV_1851	rnpA	-2.72207	0.272169	2.49606e-10	6.44673e-09	TRUE	14.3994	97.4744	742.596
sgRNA0686	SPV_1853	ackA	-1.27505	0.128887	0.0328386	0.254882	FALSE	217.546	511.463	831.69
sgRNA0687	SPV_1854	SPV_1854	-0.368218	0.0919816	1	1	FALSE	347.901	463.391	554.893
sgRNA0688	SPV_2427,SPV_1857,SPV_1858,SPV_1859,SPV_1860,SPV_1861,SPV_1862,SPV_1863	SPV_2427,comGG,comGF,comGE,comGD,comGC,comGB,comGA	-0.00862423	0.107331	1	1	FALSE	726.505	723.85	709.847
sgRNA0689	SPV_1864	SPV_1864	0.113342	0.131173	1	1	FALSE	695.529	679.751	685.438
sgRNA0690	SPV_1865	adh	0.035461	0.0958504	1	1	FALSE	479.631	470.699	425.659
sgRNA0691	SPV_1866	nagA	0.166728	0.115378	1	1	FALSE	387.101	340.388	388.495
sgRNA0692	SPV_1867	adr	-0.431659	0.131188	1	1	FALSE	225.218	291.011	320.043
sgRNA0693	SPV_1869	SPV_1869	0.29685	0.102402	1	1	FALSE	354.297	302.684	294.234
sgRNA0694	SPV_1870	pcp2	0.0509739	0.121659	1	1	FALSE	468.703	425.259	453.029
sgRNA0695	SPV_1870,SPV_1871,SPV_1872,SPV_2431	pcp2,SPV_1871,SPV_1872,SPV_2431	0.0905959	0.079033	1	1	FALSE	682.45	633.992	556.449
sgRNA0696	SPV_1874	SPV_1874	0.101514	0.0841444	1	1	FALSE	578.096	523.32	459.707
sgRNA0697	SPV_1877	thrC	-1.05673	0.172594	0.742397	1	FALSE	184.605	443.496	620.871
sgRNA0698	SPV_1878	SPV_1878	-0.22926	0.0936627	1	1	FALSE	629.774	753.36	781.263
sgRNA0699	SPV_1879	tRNA-Leu-6	-1.55184	0.148844	0.000209305	0.0022886	TRUE	184.247	539.998	2286.67
sgRNA0700	SPV_1879,SPV_1880,SPV_1881	tRNA-Leu-6,tRNA-Gln-2,tRNA-His-1	-0.944354	0.227844	1	1	FALSE	132.625	251.089	1727.6
sgRNA0701	SPV_1896	gltX	-2.19357	0.324423	0.000234104	0.00254121	TRUE	39.0461	175.494	2238.07
sgRNA0702	SPV_1897	pgi	-1.13815	0.158679	0.383949	1	FALSE	82.2022	202.762	229.973
sgRNA0703	SPV_1898,SPV_1899	SPV_1898,SPV_1899	0.0128296	0.0940643	1	1	FALSE	622.787	638.736	532.102
sgRNA0704	SPV_1902	patA	0.0872579	0.126522	1	1	FALSE	412.162	398.732	391.143
sgRNA0705	SPV_1904	argR1	-2.05042	0.168567	4.62156e-10	1.15313e-08	TRUE	81.7488	379.259	2564.58
sgRNA0706	SPV_1905	argS	-0.64004	0.115686	1	1	FALSE	252.973	382.737	957.733
sgRNA0707	SPV_1908,SPV_1909	pnpR,pnpS	-0.0546204	0.109262	1	1	FALSE	395.088	409.136	409.053
sgRNA0708	SPV_1918,SPV_1919	gpsA,galU	-1.11577	0.219568	0.598024	1	FALSE	343.685	791.305	1454.88
sgRNA0709	SPV_1923	dapD	0.0711608	0.126347	1	1	FALSE	372.734	345.008	354.291
sgRNA0710	SPV_2436	srf-25	0.0560448	0.0918309	1	1	FALSE	315.074	320.092	310.127
sgRNA0711	SPV_1924	SPV_1924	0.0874313	0.107377	1	1	FALSE	641.775	590.426	672.888
sgRNA0712	SPV_1925	pbp1b	-0.131091	0.108258	1	1	FALSE	389.568	413.653	454.206
sgRNA0713	SPV_1926	tyrS	0.0178178	0.132442	1	1	FALSE	209.333	207.115	228.705
sgRNA0714	SPV_1927,SPV_1928	ctpC,SPV_1928	0.068617	0.122885	1	1	FALSE	300.134	280.88	310.811
sgRNA0715	SPV_1929	rrmA	0.144737	0.100534	1	1	FALSE	556.67	488.26	531.643
sgRNA0716	SPV_1932,SPV_1933	malP,malQ	-0.324298	0.114941	1	1	FALSE	519.301	669.803	765.794
sgRNA0717	SPV_1934	malX	0.136847	0.104701	1	1	FALSE	486.502	422.212	395.845
sgRNA0718	SPV_1937,SPV_1938	malA,malR	-0.208483	0.128059	1	1	FALSE	263.42	282.606	357.413
sgRNA0719	SPV_1940,SPV_1941	SPV_1940,aspS	-2.31367	0.278301	2.35476e-06	3.48864e-05	TRUE	9.35684	66.1865	476.147
sgRNA0720	SPV_1943	SPV_1943	0.0451173	0.137677	1	1	FALSE	296.102	278.315	278.827
sgRNA0721	SPV_1948	SPV_1948	0.0296165	0.0946126	1	1	FALSE	383.38	377.588	406.843
sgRNA0722	SPV_1950	hisS	-2.71321	0.261674	5.86627e-11	1.62735e-09	TRUE	11.0847	58.4981	812.656
sgRNA0723	SPV_1951	SPV_1951	-0.0251487	0.10555	1	1	FALSE	285.632	313.834	317.958
sgRNA0724	SPV_1952	rgg	0.0857958	0.0857676	1	1	FALSE	544.915	514.625	496.713
sgRNA0725	SPV_1954	SPV_1954	-0.0535796	0.109881	1	1	FALSE	377.459	390.816	365.879
sgRNA0726	SPV_1956	ilvD	-0.0216237	0.0940257	1	1	FALSE	765.323	733.623	732.906
sgRNA0727	SPV_1962,SPV_2438	SPV_1962,SPV_2438	-0.101558	0.127736	1	1	FALSE	339.936	366.402	325.297
sgRNA0728	SPV_1963,SPV_1964	rpmF,rpmG3	-1.16782	0.156077	0.282274	1	FALSE	152.673	379.259	820.909
sgRNA0729	SPV_1965	cbpN	0.150451	0.114509	1	1	FALSE	390.677	352.702	296.159
sgRNA0730	SPV_2439,SPV_1969,SPV_1970,SPV_1971,SPV_1972	SPV_2439,SPV_1969,SPV_1970,SPV_1971,SPV_1972	0.159181	0.0797033	1	1	FALSE	639.978	559.551	541.821
sgRNA0731	SPV_1974,SPV_2441	SPV_1974,SPV_2441	0.132132	0.10023	1	1	FALSE	558.143	508.155	469.445
sgRNA0732	SPV_2442,SPV_1975	srf-26,arcA	0.0794674	0.108061	1	1	FALSE	374.886	343.54	345.882
sgRNA0733	SPV_1984	ybbK	0.0551278	0.0913545	1	1	FALSE	634.757	614.439	567.859
sgRNA0734	SPV_1985,SPV_1986,SPV_1987,SPV_1988,SPV_1989,SPV_1990,SPV_1991,SPV_1992,SPV_1993,SPV_1994,SPV_1995	adh2,fucI,fucL,fucY,SPV_1989,SPV_1990,SPV_1991,SPV_1992,fucU,fucA,fucK	-0.0802903	0.109721	1	1	FALSE	276.59	300.395	250.358
sgRNA0735	SPV_1996	fucR	0.155117	0.125419	1	1	FALSE	260.525	224.649	254.066
sgRNA0736	SPV_2448	SPV_2448	0.0481666	0.155632	1	1	FALSE	229.478	197.629	195.517
sgRNA0737	SPV_2447,SPV_2449	srf-27,srf-28	-2.24361	0.238293	1.80082e-07	3.17369e-06	TRUE	33.9044	147.494	848.659
sgRNA0738	SPV_2450	SPV_2450	-0.0590181	0.146185	1	1	FALSE	217.995	229.986	209.907
sgRNA0739	SPV_2449	srf-28	-0.181852	0.18931	1	1	FALSE	287.354	305.249	796.302
sgRNA0740	SPV_1997,SPV_1998,SPV_1999,SPV_2000	adcA,adcB,adcC,adcR	-2.25448	0.131952	1.96141e-21	1.83637e-19	TRUE	132.812	665.017	2996.85
sgRNA0741	SPV_2006	SPV_2006	-0.00833734	0.0998541	1	1	FALSE	879.016	905.354	831.06
sgRNA0742	SPV_2007	SPV_2007	-0.0117785	0.116069	1	1	FALSE	223.214	227.013	233.878
sgRNA0743	SPV_2010,SPV_2011,SPV_2012,SPV_2013	SPV_2010,glpF,glpO,glpK	0.15093	0.111805	1	1	FALSE	348.969	314.085	301.367
sgRNA0744	SPV_2010,SPV_2011,SPV_2012,SPV_2013,SPV_2014	SPV_2010,glpF,glpO,glpK,SPV_2014	0.0284527	0.11618	1	1	FALSE	337.609	333.244	295.462
sgRNA0745	SPV_2015,SPV_2016	hslO,SPV_2016	-0.707795	0.135031	1	1	FALSE	410.516	756.709	1194.92
sgRNA0746	SPV_2017,SPV_2018	cbpA,SPV_2018	0.196334	0.0925027	1	1	FALSE	577.857	514.035	470.557
sgRNA0747	SPV_2022,SPV_2023	clpC,ctsR	-0.279289	0.134113	1	1	FALSE	485.174	561.265	859.56
sgRNA0748	SPV_2024,SPV_2025,SPV_2026,SPV_2027	thiZ,thiY,thiX,SPV_2027	-0.0537082	0.0952243	1	1	FALSE	313.603	318.376	348.77
sgRNA0749	SPV_2028,SPV_2028,SPV_2454	cbpD,cbpD,srf-29	0.0407844	0.12665	1	1	FALSE	240.849	247.149	219.407
sgRNA0750	SPV_2029	SPV_2029	-0.292592	0.227812	1	1	FALSE	122.725	148.617	213.051
sgRNA0751	SPV_2031,SPV_2032	rplI,pde1	-2.08625	0.259391	2.81808e-05	0.0003513	TRUE	18.4573	85.097	250.08
sgRNA0752	SPV_2033	hpf	-0.200633	0.0885389	1	1	FALSE	312.043	358.894	403.491
sgRNA0753	SPV_2034,SPV_2035	comFC,comFA	0.0740075	0.110074	1	1	FALSE	642.561	589.724	597.432
sgRNA0754	SPV_2036	SPV_2036	0.00266135	0.101102	1	1	FALSE	389.072	381.021	372.218
sgRNA0755	SPV_2037	cysK	0.136325	0.104455	1	1	FALSE	274.166	248.987	234.934
sgRNA0756	SPV_2042,SPV_2458	rpsB,srf-30	-1.63426	0.373196	0.0892192	0.641408	FALSE	30.6126	112.412	364.846
sgRNA0757	SPV_2043	pcsB	-2.24073	0.373329	0.000889236	0.00870638	TRUE	5.34652	35.7197	104.914
sgRNA0758	SPV_2049,SPV_2050,SPV_2051,SPV_2052	pgsA,rodZ,SPV_2051,SPV_2052	-0.575503	0.237575	1	1	FALSE	102.25	171.631	241.625
sgRNA0759	SPV_2053,SPV_2054	SPV_2053,recF	0.0188808	0.0842838	1	1	FALSE	434.732	414.482	400.686
sgRNA0760	SPV_2055	guaB	-2.1952	0.305202	8.99897e-05	0.00103696	TRUE	145.835	605.134	1776.45
sgRNA0761	SPV_2056	trpS	-2.67776	0.323997	2.23867e-07	3.81083e-06	TRUE	18.5399	115.415	1272.62
sgRNA0762	SPV_2057	SPV_2057	0.049511	0.123811	1	1	FALSE	446.259	428.219	481.568
sgRNA0763	SPV_2060	pipR	0.138889	0.141289	1	1	FALSE	184.078	158.893	164.255
sgRNA0764	SPV_2062,SPV_2063,SPV_2064,SPV_2065	tRNA-Glu-5,comE,comD,comC1	0.136655	0.121222	1	1	FALSE	221.742	191.101	235.867
sgRNA0765	SPV_2066	tRNA-Arg-5	-1.81589	0.173576	2.59569e-06	3.76548e-05	TRUE	81.0191	269.413	254.732
sgRNA0766	SPV_2066,SPV_2067	tRNA-Arg-5,rlmH	-0.0732444	0.092082	1	1	FALSE	587.502	596.048	639.386
sgRNA0767	SPV_2068,SPV_2069	htrA,parB	-0.418433	0.135911	1	1	FALSE	203.445	299.256	376.989
sgRNA0768	SPV_2069	parB	-0.00158861	0.138995	1	1	FALSE	321.991	302.684	340.553
sgRNA0769	SPV_0005	pth	0.876	0.134124	1	1	FALSE	515.646	272.729	210.937
sgRNA0770	SPV_0011	tilS	-0.13873	0.178082	1	1	FALSE	103.057	111.081	107.682
sgRNA0771	SPV_0013	ftsH	-2.11782	0.402485	0.00548146	0.0488764	TRUE	31.2515	121.739	381.939
sgRNA0772	SPV_0038	polA	-0.424468	0.116109	1	1	FALSE	313.105	421.344	453.483
sgRNA0773	SPV_0111	argH	0.0579407	0.106634	1	1	FALSE	599.336	558.894	526.093
sgRNA0774	SPV_0130	rnjA	1.95688	0.262944	0.000273578	0.00292729	TRUE	246.355	65.4882	54.7847
sgRNA0775	SPV_0136	tsaD	-1.74597	0.170007	1.14482e-05	0.000151764	TRUE	135.043	526.341	1344.89
sgRNA0776	SPV_0214	adk	-2.28761	0.284673	6.09308e-06	8.53031e-05	TRUE	12.3374	51.4784	312.799
sgRNA0777	SPV_0270	sulB	-0.704077	0.192822	1	1	FALSE	230.77	358.248	528.731
sgRNA0778	SPV_0271	sulC	-0.437743	0.175677	1	1	FALSE	286.189	354.797	633.53
sgRNA0779	SPV_0272	sulD	-0.582419	0.136827	1	1	FALSE	127.196	201.438	274.9
sgRNA0780	SPV_0305	ftsL	-2.5198	1.28295	0.236171	1	FALSE	0	1.05058	15.2883
sgRNA0781	SPV_0331	cps2O	-0.314831	0.112852	1	1	FALSE	339.685	421.283	372.334
sgRNA0782	SPV_0403	SPV_0403	-0.595721	0.143713	1	1	FALSE	290.968	469.609	606.118
sgRNA0783	SPV_0494	valS	-2.5472	0.20656	6.87106e-14	2.70864e-12	TRUE	34.6715	219.571	1895.07
sgRNA0784	SPV_0506	pheT	-2.91093	0.204119	7.83307e-21	6.17576e-19	TRUE	22.662	126.07	1400.93
sgRNA0785	SPV_0600	divIB	2.8802	0.543389	0.000539899	0.00550182	TRUE	38.6288	6.41279	9.74121
sgRNA0786	SPV_0678	rimM	-1.25742	0.13846	0.0630011	0.467206	FALSE	269.535	682.877	1263.17
sgRNA0787	SPV_0679	trmD	-0.623332	0.143186	1	1	FALSE	167.302	262.451	389.778
sgRNA0788	SPV_0706	rodA	-1.93018	0.206608	6.7275e-06	9.24569e-05	TRUE	50.1725	174.911	455.323
sgRNA0789	SPV_0709	gyrB	-1.27912	0.156345	0.0742111	0.544942	FALSE	221.271	497.234	2039.92
sgRNA0790	SPV_0748	parC	-0.196497	0.171998	1	1	FALSE	200.092	209.057	199.604
sgRNA0791	SPV_0760	dnaX	-1.07305	0.167938	0.663586	1	FALSE	41.1391	81.423	154.351
sgRNA0792	SPV_0768	cozE	1.00689	0.160595	0.965768	1	FALSE	238.734	99.4757	138.474
sgRNA0793	SPV_0820	rluD1	-0.391722	0.147879	1	1	FALSE	508.507	633.992	696.1
sgRNA0794	SPV_0827	yabA	0.542997	0.144161	1	1	FALSE	639.445	403.706	367.735
sgRNA0795	SPV_0835	frr	-1.15723	0.174398	0.367291	1	FALSE	173.634	393.968	559.351
sgRNA0796	SPV_0847	infC	-2.41777	0.292844	1.28946e-06	2.05491e-05	TRUE	14.3806	90.3499	498.664
sgRNA0797	SPV_0848	rpmI	-1.4972	0.2716	0.0671551	0.495559	FALSE	21.2493	70.5407	340.727
sgRNA0798	SPV_0859	coaE	-0.178821	0.101861	1	1	FALSE	407.747	498.208	498.837
sgRNA0799	SPV_0877	mtnN	-0.240908	0.0936925	1	1	FALSE	625.857	742.293	858.935
sgRNA0800	SPV_0879	dnaQ	0.872407	0.15958	1	1	FALSE	567.199	298.638	199.329
sgRNA0801	SPV_0880	SPV_0880	0.363555	0.134103	1	1	FALSE	294.266	219.317	148.396
sgRNA0802	SPV_0906	prfA	-0.870057	0.119651	1	1	FALSE	237.865	459.104	736.141
sgRNA0803	SPV_0908	tsaC	-0.550651	0.126636	1	1	FALSE	392.644	546.302	792.403
sgRNA0804	SPV_0964	obgE	-1.03302	0.157596	0.834035	1	FALSE	100.065	206.815	404.925
sgRNA0805	SPV_0965	SPV_0965	-0.61882	0.155822	1	1	FALSE	181.209	249.518	342.688
sgRNA0806	SPV_0970	map	0.346746	0.156918	1	1	FALSE	249.065	193.149	195.969
sgRNA0807	SPV_0979	nifS	-1.5317	0.193007	0.00587198	0.0517425	FALSE	136.941	404.473	1159.05
sgRNA0808	SPV_0989	rplU	-0.870431	0.224331	1	1	FALSE	60.3655	121.867	370.389
sgRNA0809	SPV_0990	SPV_0990	-1.09594	0.256367	0.708247	1	FALSE	52.2651	133.424	446.38
sgRNA0810	SPV_0991	rpmA	-2.07377	0.21218	4.1784e-07	7.03285e-06	TRUE	60.7469	294.162	979.596
sgRNA0811	SPV_1101	ftsY	-0.843505	0.107398	1	1	FALSE	219.078	412.648	485.833
sgRNA0812	SPV_1104	smc	-2.18473	0.723279	0.101422	0.723474	FALSE	1.6959	12.8723	12.0053
sgRNA0813	SPV_1129	licD1	-0.736807	0.248931	1	1	FALSE	69.0225	98.0238	118.616
sgRNA0814	SPV_1142	ffh	-2.25923	0.166323	3.70298e-14	1.54085e-12	TRUE	37.4785	187.352	468.181
sgRNA0815	SPV_1187	rplL	-0.796543	0.125809	1	1	FALSE	275.906	485.368	1062.87
sgRNA0816	SPV_1188	rplJ	-2.79978	0.375109	1.60243e-06	2.50045e-05	TRUE	11.7807	70.3687	712.077
sgRNA0817	SPV_1349	murC	-0.306123	0.442688	1	1	FALSE	6.39314	10.2767	17.6857
sgRNA0818	SPV_1373	aspC	-2.40397	0.323208	1.40007e-05	0.000182375	TRUE	24.6968	115.564	1279.65
sgRNA0819	SPV_1398	engB	-1.10848	0.118378	0.359477	1	FALSE	283.052	615.297	946.07
sgRNA0820	SPV_1399	clpX	-0.865058	0.157172	1	1	FALSE	65.556	123.126	193.892
sgRNA0821	SPV_1428	cmk	-1.41346	0.154978	0.00763342	0.0660975	FALSE	115.695	321.478	468.645
sgRNA0822	SPV_1472	ileS	-2.00488	0.317326	0.00154179	0.0145258	TRUE	10.5143	48.3267	471.657
sgRNA0823	SPV_2374,SPV_1474	SPV_2374,divIVA	-1.68891	0.22101	0.00182656	0.0171012	TRUE	35.1273	98.0238	656.294
sgRNA0824	SPV_1483	murF	-3.79462	0.53287	1.56738e-07	2.83787e-06	TRUE	1.5078	21.0116	48.8683
sgRNA0825	SPV_1485	recR	0.587723	0.135325	1	1	FALSE	358.588	230.83	257.887
sgRNA0826	SPV_1508	alr	-2.53691	0.293534	1.64184e-07	2.92795e-06	TRUE	9.67438	50.0198	76.5839
sgRNA0827	SPV_1509	acpS	-2.67411	0.390467	1.80739e-05	0.000229446	TRUE	5.87957	46.422	78.0828
sgRNA0828	SPV_1519	engA	-1.22504	0.14371	0.117372	0.829358	FALSE	136.645	327.052	625.01
sgRNA0829	SPV_1521	dnaI	-2.06088	0.174266	1.14552e-09	2.68122e-08	TRUE	41.6039	159.99	424.279
sgRNA0830	SPV_1545	fmt	-1.43742	0.224859	0.0517401	0.38948	FALSE	97.459	242.684	341.593
sgRNA0831	SPV_1546	priA	-1.67149	0.204723	0.00103799	0.0100317	TRUE	77.0956	251.384	346.587
sgRNA0832	SPV_1655	scpB	0.619322	0.199749	1	1	FALSE	207.047	120.817	132.875
sgRNA0833	SPV_1656	scpA	0.565773	0.112858	1	1	FALSE	486.894	319.98	284.566
sgRNA0834	SPV_1758	rpoC	-3.29511	0.241325	1.89837e-21	1.83637e-19	TRUE	15.8898	152.624	791.646
sgRNA0835	SPV_1759	rpoB	-3.1075	0.224647	6.5106e-21	5.41827e-19	TRUE	26.0821	262.645	1298.26
sgRNA0836	SPV_1764	murA-2	-1.20605	0.0960772	0.0319835	0.249538	FALSE	317.082	651.384	1291.72
sgRNA0837	SPV_1819	nusG	0.228447	0.131419	1	1	FALSE	804.973	804.095	1011.2
sgRNA0838	SPV_1820	secE	-0.523017	0.222413	1	1	FALSE	152.152	256.342	171.626
sgRNA0839	SPV_1849	eloR	-2.44773	0.137279	5.30281e-26	1.32394e-23	TRUE	64.7951	366.652	2022.55
sgRNA0840	SPV_2030	dnaC	-1.14132	0.164817	0.391204	1	FALSE	66.9898	135.525	314.692
sgRNA0841	SPV_2041	tsf	-1.94797	0.154639	8.77591e-10	2.08672e-08	TRUE	53.7291	202.762	886.381
sgRNA0842	SPV_2044	mreD	-1.0626	0.187337	0.738254	1	FALSE	130.476	274.387	537.512
sgRNA0843	SPV_2045	mreC	-0.676751	0.210645	1	1	FALSE	151.498	247.149	526.417
sgRNA0844	SPV_0621,SPV_0619	lctO,SPV_0619	-0.0465656	0.106302	1	1	FALSE	463.959	482.214	407.539
sgRNA0845	NA	NA	0.212719	0.116625	1	1	FALSE	388.266	355.276	373.148
sgRNA0846	SPV_2297,SPV_1038	phtB,phtA	0.0369497	0.0979006	1	1	FALSE	584.931	575.718	541.291
sgRNA0847	SPV_1038	phtA	0.0464097	0.0968893	1	1	FALSE	364.305	343.262	339.872
sgRNA0848	SPV_2214,SPV_0639,SPV_2318,SPV_1316,SPV_2348,SPV_2221,SPV_0711	SPV_2214,SPV_0639,SPV_2318,SPV_1316,SPV_2348,SPV_2221,SPV_0711	0.124729	0.145156	1	1	FALSE	387.668	372.205	339.021
sgRNA0849	SPV_2163,SPV_2407	SPV_2163,SPV_2407	-0.140296	0.159177	1	1	FALSE	1024.55	1178.79	1126.43
sgRNA0850	SPV_1058,SPV_0559,SPV_0560,SPV_0561,SPV_0562	SPV_1058,SPV_0559,SPV_0560,SPV_0561,bgaA	0.0101575	0.0795814	1	1	FALSE	1122.37	1119.92	1072.39
sgRNA0851	SPV_0085,SPV_2094,SPV_1317	SPV_0085,SPV_2094,SPV_1317	0.216513	0.128698	1	1	FALSE	222.523	216.36	203.17
sgRNA0852	SPV_1682,SPV_1683,SPV_1887	tRNA-Ser-2,tRNA-Ile-1,tRNA-Ile-2	-2.07499	0.423601	0.0111569	0.0944241	FALSE	8.84007	58.8325	352.762
sgRNA0853	SPV_1883,SPV_0755	tRNA-Tyr-2,tRNA-Tyr-1	-2.91738	0.398451	1.49372e-06	2.35535e-05	TRUE	13.6331	101.976	1321.72
sgRNA0854	SPV_0794,SPV_2241,SPV_2251,SPV_0832,SPV_2274,SPV_0971,SPV_1966	SPV_0794,SPV_2241,SPV_2251,SPV_0832,SPV_2274,SPV_0971,SPV_1966	-0.00118295	0.0957399	1	1	FALSE	439.263	433.368	481.563
sgRNA0855	SPV_2274,SPV_0972,SPV_2304,SPV_2305,SPV_1170,SPV_1171,SPV_1172,SPV_1173,SPV_2322,SPV_1539,SPV_2386,SPV_1906,SPV_1967,SPV_2414,SPV_2415,SPV_2083,SPV_0045	SPV_2274,SPV_0972,SPV_2304,SPV_2305,appA,SPV_1171,nanE-2,SPV_1173,SPV_2322,SPV_1539,SPV_2386,SPV_1906,SPV_1967,SPV_2414,SPV_2415,SPV_2083,SPV_0045	0.227888	0.093103	1	1	FALSE	672.876	578.87	531.641
sgRNA0856	SPV_0041,SPV_0042,SPV_0043,SPV_0044,SPV_0045	araT,recO,plsX,SPV_0044,SPV_0045	-0.166178	0.110186	1	1	FALSE	421.718	493.234	492.261
sgRNA0857	SPV_2432	SPV_2432	-0.0243205	0.0845584	1	1	FALSE	590.301	596.838	527.038
sgRNA0858	SPV_2326	SPV_2326	0.0236149	0.127466	1	1	FALSE	232.116	200.808	268.957
sgRNA0859	SPV_1682	tRNA-Ser-2	-2.68177	0.262127	1.40032e-10	3.68015e-09	TRUE	11.7591	67.9842	351.044
sgRNA0860	SPV_1700,SPV_1814,SPV_1891,SPV_0018	rrlB,rrlC,rrlD,rrlA	-2.66158	0.206861	9.5591e-16	4.47485e-14	TRUE	56.0546	352.995	2217.33
sgRNA0861	SPV_1703,SPV_1817,SPV_1894,SPV_2062,SPV_0015	tRNA-Glu-2,tRNA-Glu-3,tRNA-Glu-4,tRNA-Glu-5,tRNA-Glu-1	-1.48235	0.327771	0.141123	0.983268	FALSE	12.1741	48.3267	130.777
sgRNA0862	SPV_1699,SPV_1813,SPV_1890,SPV_0019	rrfB,rrfC,rrfD,rrfA	-2.44272	0.271623	1.0874e-07	2.06192e-06	TRUE	21.9583	117.665	383.269
sgRNA0863	SPV_1818,SPV_0014	comX2,comX1	-0.0265918	0.0974464	1	1	FALSE	508.485	520.949	436.877
sgRNA0864	SPV_1682,SPV_1683,SPV_1684,SPV_1685,SPV_1686,SPV_1687,SPV_1688,SPV_1689,SPV_1690,SPV_1691,SPV_1692,SPV_1693,SPV_1694,SPV_1695,SPV_1804,SPV_1805,SPV_1806,SPV_1807,SPV_1808,SPV_1809	tRNA-Ser-2,tRNA-Ile-1,tRNA-Gly-1,tRNA-Phe-1,tRNA-fMet-1,tRNA-Ser-3,tRNA-Ile2-1,tRNA-Met-1,tRNA-Pro-1,tRNA-Arg-3,tRNA-Leu-2,tRNA-Gly-2,tRNA-Thr-2,tRNA-Leu-3,tRNA-Pro-2,tRNA-Arg-4,tRNA-Leu-4,tRNA-Gly-3,tRNA-Thr-3,tRNA-Leu-5	-2.36123	0.232285	4.62407e-09	9.75614e-08	TRUE	26.1211	134.474	776.493
sgRNA0865	SPV_0358,SPV_2155,SPV_2156,SPV_2341,SPV_2343,SPV_1315,SPV_2346,SPV_0743,SPV_2230,SPV_0744	SPV_0358,SPV_2155,SPV_2156,SPV_2341,SPV_2343,SPV_1315,SPV_2346,SPV_0743,SPV_2230,SPV_0744	0.123035	0.115782	1	1	FALSE	321.769	294.071	299.95
sgRNA0866	SPV_1702,SPV_1816,SPV_1893,SPV_0016	rrsB,rrsC,rrsD,rrsA	-1.8127	0.171971	2.29217e-06	3.43368e-05	TRUE	68.4616	254.24	461.08
sgRNA0868	SPV_1623,SPV_2086,SPV_0049,SPV_0050	SPV_1623,srf-03,comA,comB	-0.00414495	0.289765	1	1	FALSE	685.812	702.962	946.29
sgRNA0869	SPV_2143,SPV_0314,SPV_1825,SPV_2425,SPV_2268,SPV_1014,SPV_2263,SPV_2264,SPV_2223,SPV_0716,SPV_2093,SPV_2070,SPV_2071	SPV_2143,SPV_0314,SPV_1825,SPV_2425,SPV_2268,SPV_1014,SPV_2263,SPV_2264,SPV_2223,SPV_0716,SPV_2093,SPV_2070,SPV_2071	0.276012	0.163021	1	1	FALSE	213.169	179.447	146.413
sgRNA0870	SPV_0003	SPV_0003	-0.623319	0.142109	1	1	FALSE	252.213	427.586	641.781
sgRNA0871	SPV_0006	mfd	1.05192	0.160812	0.746781	1	FALSE	299.069	140.924	133.857
sgRNA0872	SPV_0010	SPV_0010	-0.0636029	0.167105	1	1	FALSE	140.041	142.293	213.147
sgRNA0873	SPV_1701,SPV_1815,SPV_1892,SPV_0017	tRNA-Ala-2,tRNA-Ala-3,tRNA-Ala-4,tRNA-Ala-1	-0.318728	0.0852329	1	1	FALSE	399.088	484.807	482.429
sgRNA0874	SPV_0034,SPV_2080	SPV_0034,SPV_2080	0.0455121	0.128319	1	1	FALSE	194.642	183.406	187.304
sgRNA0875	SPV_0047	SPV_0047	0.193714	0.121295	1	1	FALSE	271.601	231.702	257.708
sgRNA0876	SPV_0063	strH	-0.0621062	0.0915048	1	1	FALSE	429.421	438.635	388.266
sgRNA0877	SPV_0077	cabP	0.0952429	0.0963171	1	1	FALSE	833.869	757.313	759.857
sgRNA0878	SPV_0086	SPV_0086	-0.0243454	0.105467	1	1	FALSE	462.543	467.695	401.294
sgRNA0879	SPV_0086,SPV_0087	SPV_0086,SPV_0087	0.0761751	0.121996	1	1	FALSE	277.261	261.642	261.33
sgRNA0880	SPV_0088	SPV_0088	0.18713	0.112892	1	1	FALSE	305.658	250.038	258.078
sgRNA0881	SPV_0089	SPV_0089	0.0992668	0.0943294	1	1	FALSE	283.818	263.241	263.156
sgRNA0882	SPV_0090	SPV_0090	0.0173478	0.091009	1	1	FALSE	387.655	374.507	411.174
sgRNA0883	SPV_0106	SPV_0106	-0.2276	0.119373	1	1	FALSE	203.051	224.837	222.855
sgRNA0884	SPV_0109	SPV_0109	0.134857	0.141863	1	1	FALSE	160.675	141.828	157.92
sgRNA0885	SPV_0110	argG	0.11582	0.154501	1	1	FALSE	288.707	251.439	287.334
sgRNA0886	SPV_0113,SPV_2097	SPV_0113,SPV_2097	0.0510966	0.113818	1	1	FALSE	607.718	562.846	520.519
sgRNA0887	SPV_0114	SPV_0114	0.105487	0.116252	1	1	FALSE	385.963	349.823	367.931
sgRNA0888	SPV_0115	SPV_0115	0.064224	0.0855877	1	1	FALSE	513.372	487.432	418.883
sgRNA0889	SPV_0116	SPV_0116	0.166772	0.100169	1	1	FALSE	458.148	399.9	436.482
sgRNA0890	SPV_0117	SPV_0117	-0.0507595	0.106146	1	1	FALSE	364.844	366.799	320.05
sgRNA0891	SPV_0118	SPV_0118	-0.0593848	0.12331	1	1	FALSE	201.479	187.253	182.082
sgRNA0892	SPV_0135	rimI	-1.47691	0.208248	0.0220161	0.181345	FALSE	112.937	320.64	1034.11
sgRNA0893	SPV_0138	epsF	0.036989	0.113428	1	1	FALSE	281.321	272.729	273.016
sgRNA0894	SPV_0139	SPV_0139	-0.0364375	0.111962	1	1	FALSE	338.891	353.968	342.921
sgRNA0895	SPV_0140	SPV_0140	-0.00778971	0.142299	1	1	FALSE	285.088	268.603	257.448
sgRNA0896	SPV_0141	SPV_0141	-0.00548438	0.12517	1	1	FALSE	240.353	240.283	231.7
sgRNA0897	SPV_0142	SPV_0142	0.120914	0.109799	1	1	FALSE	371.946	335.539	299.667
sgRNA0898	SPV_0143	ugd	0.106667	0.107728	1	1	FALSE	310.575	304.23	276.651
sgRNA0899	SPV_0149	azlC	2.79291	0.155126	6.74407e-31	3.36754e-28	TRUE	669.78	96.9888	69.1366
sgRNA0900	SPV_0152	dapE	0.0220151	0.121853	1	1	FALSE	190.568	189.652	167.4
sgRNA0901	SPV_0172	SPV_0172	0.0830898	0.100278	1	1	FALSE	294.838	286.822	261.953
sgRNA0902	SPV_0179	SPV_0179	-0.00514609	0.154367	1	1	FALSE	256.247	242.688	232.936
sgRNA0903	SPV_0183	folC	-0.541374	0.144675	1	1	FALSE	258.485	376.285	407.29
sgRNA0904	SPV_0225	SPV_0225	0.0406079	0.155199	1	1	FALSE	239.798	247.937	245.059
sgRNA0905	SPV_0230	deoR	0.481009	0.110738	1	1	FALSE	507.096	356.455	292.697
sgRNA0906	SPV_0231	SPV_0231	0.112656	0.117663	1	1	FALSE	273.067	251.384	202.888
sgRNA0907	SPV_0232	SPV_0232	-0.0211437	0.120429	1	1	FALSE	236.013	233.992	216.622
sgRNA0908	SPV_0233	SPV_0233	0.0544279	0.10935	1	1	FALSE	278.206	274.467	271.674
sgRNA0909	SPV_0234	SPV_0234	-0.186182	0.130764	1	1	FALSE	226.522	257.708	254.789
sgRNA0910	SPV_0235	SPV_0235	-0.0212719	0.11904	1	1	FALSE	241.193	243.716	247.555
sgRNA0911	SPV_0236	talC	0.0957265	0.0917166	1	1	FALSE	416.866	373.863	381.651
sgRNA0912	SPV_0237	gldA	0.0672017	0.112166	1	1	FALSE	349.664	327.781	302.424
sgRNA0913	SPV_0240	SPV_0240	0.268089	0.120983	1	1	FALSE	435.47	403.162	323.208
sgRNA0914	SPV_0242	SPV_0242	-1.45468	0.17153	0.00803211	0.0687549	FALSE	60.8983	165.992	337.266
sgRNA0915	SPV_0256	relE1	0.0160199	0.0942267	1	1	FALSE	485.932	478.851	494.255
sgRNA0916	SPV_0257	SPV_0257	-0.13743	0.103867	1	1	FALSE	252.584	271.071	279.233
sgRNA0917	SPV_0258	pepS	0.0101256	0.117557	1	1	FALSE	234.106	239.838	271.761
sgRNA0918	SPV_0259	SPV_0259	-0.0751632	0.0976609	1	1	FALSE	330.822	350.988	332.199
sgRNA0919	SPV_0268	SPV_0268	0.208359	0.179795	1	1	FALSE	126.694	120.949	117.732
sgRNA0920	SPV_0276	SPV_0276	-0.0290331	0.14643	1	1	FALSE	122.773	122.687	125.893
sgRNA0921	SPV_0285	SPV_0285	-0.0893524	0.119939	1	1	FALSE	255.105	287.859	250.248
sgRNA0922	SPV_0287	spnHL	0.148062	0.0980327	1	1	FALSE	408.015	364.551	382.223
sgRNA0923	SPV_0293	SPV_0293	0.122493	0.113535	1	1	FALSE	215.231	200.609	184.868
sgRNA0924	SPV_0294	ugl	0.158259	0.117314	1	1	FALSE	368.431	314.625	339.968
sgRNA0925	SPV_0295	SPV_0295	0.185887	0.104449	1	1	FALSE	272.705	245.432	230.162
sgRNA0926	SPV_0296	SPV_0296	-0.031135	0.112291	1	1	FALSE	386.203	397.119	352.399
sgRNA0927	SPV_0297	SPV_0297	0.0895307	0.103552	1	1	FALSE	445.519	418.182	393.435
sgRNA0928	SPV_0298	yajC-1	-0.0894256	0.0921079	1	1	FALSE	419.311	455.952	424.805
sgRNA0929	SPV_0302	SPV_0302	0.255358	0.12227	1	1	FALSE	382.235	337.255	291.177
sgRNA0930	SPV_0335	eng	-0.0995928	0.117485	1	1	FALSE	514.953	546.37	456.707
sgRNA0931	SPV_0341	rlmL	-1.31158	0.0857835	0.000281112	0.00298657	TRUE	251.704	629.886	1567.04
sgRNA0932	SPV_0342	mapZ	-1.27615	0.133467	0.0385412	0.294565	FALSE	129.663	331.226	786.639
sgRNA0933	SPV_0345	cbpF	0.121876	0.0875108	1	1	FALSE	541.982	480.959	517.668
sgRNA0934	SPV_0360	mtlA	-0.027421	0.139539	1	1	FALSE	200.614	212.905	227.57
sgRNA0935	SPV_0361	mtlR	0.00456979	0.116341	1	1	FALSE	371.694	367.29	326.216
sgRNA0936	SPV_0362	mtlA2	0.225605	0.111327	1	1	FALSE	529.591	475.099	398
sgRNA0937	SPV_0363	mtlD	0.0235115	0.0994814	1	1	FALSE	256.241	259.289	259.414
sgRNA0938	SPV_0364	SPV_0364	0.24887	0.119253	1	1	FALSE	264.168	261.594	261.709
sgRNA0939	SPV_0366	yrrC	-0.0260104	0.154447	1	1	FALSE	176.984	173.346	149.892
sgRNA0940	SPV_0371	mutS2	-0.0282079	0.103863	1	1	FALSE	356.973	383.485	368.733
sgRNA0941	SPV_0400	SPV_0400	0.0473467	0.100906	1	1	FALSE	255.063	237.913	230.392
sgRNA0942	SPV_0413	SPV_0413	0.0458862	0.120295	1	1	FALSE	396.311	396.048	376.006
sgRNA0943	SPV_0418	SPV_0418	0.866532	0.135248	1	1	FALSE	402.662	223.774	235.298
sgRNA0944	SPV_0419	dinP	0.0295567	0.134248	1	1	FALSE	276.625	278.042	276.658
sgRNA0945	SPV_0422	SPV_0422	0.00735594	0.112198	1	1	FALSE	363.53	347.036	329.479
sgRNA0946	SPV_0424	SPV_0424	0.148974	0.118753	1	1	FALSE	308.689	275.89	287.111
sgRNA0947	SPV_0425	SPV_0425	0.223238	0.127648	1	1	FALSE	224.918	206.324	168.847
sgRNA0948	SPV_0426	lacF-1	0.116172	0.158181	1	1	FALSE	184.993	168.015	146.002
sgRNA0949	SPV_0427	lacG-1	-0.040821	0.194164	1	1	FALSE	53.4207	55.336	52.2848
sgRNA0950	SPV_0428	lacE-1	0.136067	0.104975	1	1	FALSE	449.525	403.423	389.525
sgRNA0951	SPV_0432	mtsA	-0.00540865	0.100991	1	1	FALSE	432.908	415.811	363.58
sgRNA0952	SPV_0433	SPV_0433	0.38712	0.129924	1	1	FALSE	544.059	411.166	321.933
sgRNA0953	SPV_0435	mtsC	0.0377649	0.0936765	1	1	FALSE	310.438	304.645	295.323
sgRNA0954	SPV_0436	cspR	-0.0859089	0.114796	1	1	FALSE	243.141	270.356	250.349
sgRNA0955	SPV_0438	SPV_0438	0.0815428	0.100047	1	1	FALSE	267.741	250.347	251.442
sgRNA0956	SPV_0439	SPV_0439	0.057258	0.128356	1	1	FALSE	221.935	214.229	181.651
sgRNA0957	SPV_0440	SPV_0440	-0.040834	0.153267	1	1	FALSE	196.526	199.092	193.537
sgRNA0958	SPV_0449	SPV_0449	0.158867	0.111847	1	1	FALSE	335.73	303.787	273.302
sgRNA0959	SPV_0453	SPV_0453	0.157734	0.115684	1	1	FALSE	236.45	217.113	209.955
sgRNA0960	SPV_0456	SPV_0456	0.0791098	0.124193	1	1	FALSE	297.625	301.743	287.159
sgRNA0961	SPV_0457	SPV_0457	0.0828521	0.100225	1	1	FALSE	423.222	411.858	392.48
sgRNA0962	SPV_0484	SPV_0484	0.0391522	0.129112	1	1	FALSE	340.324	339.921	308.367
sgRNA0963	SPV_0485	SPV_0485	0.069629	0.129825	1	1	FALSE	205.428	200.661	171.346
sgRNA0964	SPV_0486	SPV_0486	0.0909136	0.135996	1	1	FALSE	258.048	245.059	241.085
sgRNA0965	SPV_0489	SPV_0489	-0.133584	0.130926	1	1	FALSE	220.773	244.785	267.909
sgRNA0966	SPV_0493	SPV_0493	-3.09939	0.277859	4.16925e-14	1.68798e-12	TRUE	12.2221	126.07	948.93
sgRNA0967	SPV_0501	bglG	0.117201	0.0940766	1	1	FALSE	796.951	697.68	670.971
sgRNA0968	SPV_0502	bglF	-0.0332014	0.0801695	1	1	FALSE	562.836	591.881	537.75
sgRNA0969	SPV_0503	bglA-2	0.0147661	0.0913885	1	1	FALSE	406.037	411.827	415.803
sgRNA0970	SPV_0508,SPV_2186	SPV_0508,SPV_2186	0.0520873	0.110717	1	1	FALSE	313.849	314.177	315.099
sgRNA0971	SPV_0509	higA	0.12543	0.100997	1	1	FALSE	396.173	358.113	377.78
sgRNA0972	SPV_0534	estA	0.305289	0.0955557	1	1	FALSE	778.458	626.697	492.95
sgRNA0973	SPV_0543	SPV_0543	0.0804147	0.0781615	1	1	FALSE	874.7	826.087	756.964
sgRNA0974	SPV_0552	SPV_0552	0.0438101	0.114568	1	1	FALSE	321.687	324.487	276.389
sgRNA0975	SPV_0553	SPV_0553	0.171185	0.101814	1	1	FALSE	299.836	275.468	260.738
sgRNA0976	SPV_0555	SPV_0555	0.329076	0.118693	1	1	FALSE	200.997	166.482	162.707
sgRNA0977	SPV_0556	SPV_0556	0.0269628	0.0997953	1	1	FALSE	311.227	286.957	327.897
sgRNA0978	SPV_0557,SPV_2194	SPV_0557,SPV_2194	0.0646464	0.0840893	1	1	FALSE	513.116	472.51	436.864
sgRNA0979	SPV_0563,SPV_2199	SPV_0563,SPV_2199	0.278866	0.115685	1	1	FALSE	357.447	301.401	286.843
sgRNA0980	SPV_2201,SPV_0566,SPV_0567	SPV_2201,SPV_0566,ytqB	0.119502	0.0873896	1	1	FALSE	642.348	588.933	481.092
sgRNA0981	SPV_0568	SPV_0568	0.14486	0.118788	1	1	FALSE	338.729	291.011	324.801
sgRNA0982	SPV_0569	nha2	0.307112	0.135853	1	1	FALSE	260.269	214.702	184.203
sgRNA0983	SPV_0570	yihY	0.339858	0.113532	1	1	FALSE	430.666	365.602	359.98
sgRNA0984	SPV_0577	zmpB	0.16882	0.113149	1	1	FALSE	498.072	446.241	393.772
sgRNA0985	SPV_0591	SPV_0591	0.0507844	0.100445	1	1	FALSE	538.2	508.886	480.702
sgRNA0986	SPV_0601	SPV_0601	1.62842	0.152347	3.70821e-05	0.000451617	TRUE	462.793	143.647	108.794
sgRNA0987	SPV_0602	SPV_0602	1.94562	0.20974	6.52739e-06	9.05373e-05	TRUE	575.338	141.502	97.2691
sgRNA0988	SPV_0605	SPV_0605	0.0470058	0.104157	1	1	FALSE	327.248	327.441	288.055
sgRNA0989	SPV_0606	SPV_0606	0.26374	0.173828	1	1	FALSE	115.254	96.6534	104.522
sgRNA0990	SPV_0607	SPV_0607	-0.0879348	0.117388	1	1	FALSE	269.769	298.427	255.425
sgRNA0991	SPV_0611	SPV_0611	0.186904	0.184307	1	1	FALSE	109.467	96.1919	106.017
sgRNA0992	SPV_0612	SPV_0612	0.302177	0.127072	1	1	FALSE	240.916	193.666	212.651
sgRNA0993	SPV_0613	SPV_0613	0.128232	0.148336	1	1	FALSE	142.51	127.273	138.619
sgRNA0994	SPV_0614	SPV_0614	0.119673	0.0941827	1	1	FALSE	526.947	495.156	526.69
sgRNA0995	SPV_0623	thiM-1	0.00569439	0.0964808	1	1	FALSE	291.821	291.7	296.139
sgRNA0996	SPV_0624	thiE-1	-0.0543136	0.133932	1	1	FALSE	123.449	131.225	149.138
sgRNA0997	SPV_0632	thiD	0.119951	0.0916895	1	1	FALSE	510.012	457.397	440.422
sgRNA0998	SPV_0637	SPV_0637	0.00545281	0.099322	1	1	FALSE	376.218	383.399	328.566
sgRNA0999	SPV_0640,SPV_2215	SPV_0640,SPV_2215	0.036948	0.0755205	1	1	FALSE	795.308	765.963	673.477
sgRNA1000	SPV_0642	SPV_0642	0.026125	0.154192	1	1	FALSE	213.835	203.953	196.783
sgRNA1001	SPV_0643	SPV_0643	0.0354051	0.142159	1	1	FALSE	215.284	204.863	243.625
sgRNA1002	SPV_0653	livH	0.102686	0.125058	1	1	FALSE	451.72	421.114	390.372
sgRNA1003	SPV_0654	livM	0.0828688	0.10432	1	1	FALSE	399.218	353.139	364
sgRNA1004	SPV_0655	livG	0.0936325	0.117481	1	1	FALSE	393.426	393.035	367.34
sgRNA1005	SPV_0656	livF	0.117762	0.112293	1	1	FALSE	686.903	633.584	622.715
sgRNA1006	SPV_0662	SPV_0662	0.0328436	0.116872	1	1	FALSE	353.794	362.257	367.449
sgRNA1007	SPV_0669	rlmN	0.236238	0.114789	1	1	FALSE	421.931	332.807	303.719
sgRNA1008	SPV_0670	SPV_0670	0.192768	0.11435	1	1	FALSE	423.764	375.057	375.045
sgRNA1009	SPV_0671	SPV_0671	0.103768	0.0999817	1	1	FALSE	656.059	628.17	540.154
sgRNA1010	SPV_0680	SPV_0680	0.28263	0.12038	1	1	FALSE	420.881	337.255	275.246
sgRNA1011	SPV_0682	SPV_0682	0.0444455	0.115111	1	1	FALSE	503.383	462.562	454.831
sgRNA1012	SPV_0683	SPV_0683	-0.0031592	0.114825	1	1	FALSE	248.057	251.176	213.718
sgRNA1013	SPV_0690	SPV_0690	0.0367258	0.0948622	1	1	FALSE	736.225	670.778	630.086
sgRNA1014	SPV_0692	SPV_0692	0.203466	0.14893	1	1	FALSE	410.575	377.179	381.85
sgRNA1015	SPV_0696	SPV_0696	-0.0845214	0.0879464	1	1	FALSE	549.969	573.248	506.964
sgRNA1016	SPV_0697	SPV_0697	-0.102143	0.0894421	1	1	FALSE	473.372	510.602	543.749
sgRNA1017	SPV_0698,SPV_0699	SPV_0698,SPV_0699	0.0466852	0.193792	1	1	FALSE	77.4891	83.7945	62.6809
sgRNA1018	SPV_0707	thiJ	0.0234331	0.108716	1	1	FALSE	548.183	519.436	684.797
sgRNA1019	SPV_0713	SPV_0713	1.29617	0.230499	0.198827	1	FALSE	402.165	167.34	92.0713
sgRNA1020	SPV_0715	SPV_0715	0.0549195	0.098808	1	1	FALSE	380.165	381.324	417.467
sgRNA1021	SPV_0729	SPV_0729	0.0214211	0.0974557	1	1	FALSE	520.13	510.582	494.772
sgRNA1022	SPV_0730	deoD	0.00258686	0.104948	1	1	FALSE	397.676	425.259	337.549
sgRNA1023	SPV_0731	flaR	0.161113	0.123633	1	1	FALSE	436.135	356.147	408.366
sgRNA1024	SPV_0734	SPV_0734	0.0169169	0.127275	1	1	FALSE	438.591	410.419	380.354
sgRNA1025	SPV_0736	pdp	0.0655221	0.111864	1	1	FALSE	390.737	374.507	377.225
sgRNA1026	SPV_0740	SPV_0740	-1.11133	0.208569	0.59351	1	FALSE	111.616	319.151	390.212
sgRNA1027	SPV_0741	SPV_0741	-0.91616	0.199276	1	1	FALSE	141.349	276.045	356.747
sgRNA1028	SPV_0742	SPV_0742	-1.20229	0.203395	0.31995	1	FALSE	126.92	305.249	433.756
sgRNA1029	SPV_0747	SPV_0747	-0.00576559	0.225182	1	1	FALSE	101.451	98.757	76.9946
sgRNA1030	SPV_1879,SPV_1880,SPV_0756	tRNA-Leu-6,tRNA-Gln-2,tRNA-Gln-1	-1.08974	0.280558	0.749062	1	FALSE	34.1462	68.2877	484.394
sgRNA1031	SPV_0758,SPV_2237,SPV_1681,SPV_2406,SPV_2275,SPV_0966	SPV_0758,SPV_2237,SPV_1681,SPV_2406,SPV_2275,SPV_0966	0.159476	0.100328	1	1	FALSE	314.83	288.576	285.495
sgRNA1032	SPV_0773	fruA	0.184138	0.0918008	1	1	FALSE	418.004	375.872	371.909
sgRNA1033	SPV_0795	SPV_0795	0.223856	0.0907091	1	1	FALSE	481.398	410.337	444.545
sgRNA1034	SPV_0796	SPV_0796	0.114872	0.0973782	1	1	FALSE	362.188	333.597	303.28
sgRNA1035	SPV_0797	SPV_0797	0.0721461	0.127663	1	1	FALSE	210.87	222.723	212.71
sgRNA1036	SPV_0798	SPV_0798	0.185508	0.0901486	1	1	FALSE	602.952	547.945	467.029
sgRNA1037	SPV_0804	SPV_0804	-0.00757387	0.0910985	1	1	FALSE	325.195	341.546	325.053
sgRNA1038	SPV_0805	SPV_0805	-0.0206334	0.0948822	1	1	FALSE	481.225	481.425	395.445
sgRNA1039	SPV_0806	SPV_0806	0.0174021	0.103875	1	1	FALSE	264.453	283.191	217.396
sgRNA1040	SPV_0807,SPV_1342	SPV_0807,SPV_1342	-0.0289905	0.104	1	1	FALSE	523.732	524.111	506.241
sgRNA1041	SPV_0809	cad	-0.0342745	0.131011	1	1	FALSE	322.043	335.731	324.594
sgRNA1042	SPV_0810,SPV_2248	SPV_0810,SPV_2248	0.1071	0.108433	1	1	FALSE	339.418	314.123	342.099
sgRNA1043	SPV_0811	speE	0.206845	0.0917549	1	1	FALSE	426.917	383.595	408.629
sgRNA1044	SPV_0812	lys1	0.097465	0.108974	1	1	FALSE	434.527	431.621	415.75
sgRNA1045	SPV_0813	nspC	-0.0263739	0.0819558	1	1	FALSE	607.92	599.341	515.056
sgRNA1046	SPV_0814	aguA	0.0625053	0.0738305	1	1	FALSE	832.593	777.23	700.576
sgRNA1047	SPV_0815	SPV_0815	-0.0653618	0.132601	1	1	FALSE	352.142	385.312	357.886
sgRNA1048	SPV_0821	cbpE	0.101189	0.127539	1	1	FALSE	302.031	302.572	309.629
sgRNA1049	SPV_0823	proA	-0.317883	0.100401	1	1	FALSE	335.071	421.354	380.07
sgRNA1050	SPV_0824	proC	0.163054	0.0934115	1	1	FALSE	654.937	616.601	539.832
sgRNA1051	SPV_0826	holB	-0.0345614	0.157074	1	1	FALSE	221.378	211.067	211.01
sgRNA1052	SPV_0828	SPV_0828	0.514472	0.0891862	1	1	FALSE	791.862	560.475	497.391
sgRNA1053	SPV_0829	SPV_0829	0.17475	0.0808509	1	1	FALSE	925.873	818.182	720.137
sgRNA1054	SPV_0831	SPV_0831	-0.0222431	0.127393	1	1	FALSE	335.75	332.807	288
sgRNA1055	SPV_0836	SPV_0836	-1.48863	0.129772	0.000166368	0.00185985	TRUE	247.441	677.624	1157.76
sgRNA1056	SPV_0837	SPV_0837	0.132146	0.103432	1	1	FALSE	572.2	516.996	568.813
sgRNA1057	SPV_0841,SPV_2255	ald,SPV_2255	0.0298947	0.128148	1	1	FALSE	352.92	340.712	272.121
sgRNA1058	SPV_0849	rplT	-3.19309	0.284035	1.15244e-14	5.23137e-13	TRUE	11.6201	113.834	532.778
sgRNA1059	SPV_0850	gloA	0.216666	0.114308	1	1	FALSE	455.293	391.319	352.76
sgRNA1060	SPV_0857	era	-0.209056	0.112416	1	1	FALSE	269.888	281.423	346.15
sgRNA1061	SPV_0858	mutM	-0.282019	0.130643	1	1	FALSE	291.996	357.284	360.015
sgRNA1062	SPV_0860	pmrA	-0.162469	0.103362	1	1	FALSE	266.451	298.814	294.003
sgRNA1063	SPV_0862	rnr	-0.00205634	0.128321	1	1	FALSE	374.193	365.602	339.139
sgRNA1064	SPV_0863	smpB	0.162524	0.163018	1	1	FALSE	284.168	245.432	239.407
sgRNA1065	SPV_0864	tehB	0.186509	0.145481	1	1	FALSE	323.896	309.204	319.664
sgRNA1066	SPV_0870	gpmB2	0.23896	0.0842179	1	1	FALSE	491.531	412.824	335.513
sgRNA1067	SPV_0876	SPV_0876	-0.658516	0.137977	1	1	FALSE	231.772	384.512	476.752
sgRNA1068	SPV_0883	SPV_0883	0.0830772	0.111486	1	1	FALSE	351.302	333.822	297.497
sgRNA1069	SPV_0884	SPV_0884	-0.100546	0.138013	1	1	FALSE	435.031	465.569	384.764
sgRNA1070	SPV_0905	bltD	-1.56063	0.16052	0.000478307	0.0049414	TRUE	134.883	355.096	1037.79
sgRNA1071	SPV_0907	hemK	-0.986484	0.188994	1	1	FALSE	132.051	240.316	544.954
sgRNA1072	SPV_0909	SPV_0909	0.252677	0.161336	1	1	FALSE	208.23	171.542	140.112
sgRNA1073	SPV_0910	glyA	0.312551	0.139823	1	1	FALSE	352.379	268.949	168.758
sgRNA1074	SPV_0911	SPV_0911	0.681803	0.138412	1	1	FALSE	620.635	350.127	258.79
sgRNA1075	SPV_0912	pvaA	1.44082	0.285368	0.122405	0.860861	FALSE	202.846	79.5186	60.6457
sgRNA1076	SPV_0920	SPV_0920	0.177625	0.11231	1	1	FALSE	304.815	257.808	268.965
sgRNA1077	SPV_0924	SPV_0924	0.0425434	0.154555	1	1	FALSE	111.532	109.844	94.0088
sgRNA1078	SPV_0925	SPV_0925	-0.0826836	0.103413	1	1	FALSE	375.9	384.19	328.288
sgRNA1079	SPV_0934	SPV_0934	-0.0571542	0.109804	1	1	FALSE	259.32	283.191	269.056
sgRNA1080	SPV_0935	SPV_0935	-0.022825	0.115463	1	1	FALSE	368.185	417.922	338.67
sgRNA1081	SPV_0940	rffD	-0.0182188	0.127335	1	1	FALSE	267.714	272.035	280.198
sgRNA1082	SPV_0941	SPV_0941	0.174645	0.108169	1	1	FALSE	397.969	370.723	362.991
sgRNA1083	SPV_0943	SPV_0943	0.100392	0.0922653	1	1	FALSE	399.647	382.609	355.331
sgRNA1084	SPV_0944	SPV_0944	0.0101851	0.126281	1	1	FALSE	232.323	234.279	200.014
sgRNA1085	SPV_0945	SPV_0945	0.051612	0.118356	1	1	FALSE	272.035	261.66	266.749
sgRNA1086	SPV_0946	SPV_0946	-0.135226	0.182529	1	1	FALSE	68.798	76.6923	76.6011
sgRNA1087	SPV_0947	SPV_0947	0.215245	0.118284	1	1	FALSE	164.541	154.187	136.214
sgRNA1088	SPV_0948	nikS	0.0528818	0.09482	1	1	FALSE	276.417	282.606	261.826
sgRNA1089	SPV_0949	SPV_0949	0.0572616	0.0988584	1	1	FALSE	674.415	656.917	610.751
sgRNA1090	SPV_0950	mefE	0.124051	0.0866646	1	1	FALSE	670.646	609.336	525.214
sgRNA1091	SPV_0951	SPV_0951	0.078395	0.104795	1	1	FALSE	316.223	305.059	325.276
sgRNA1092	SPV_0955	trpY	-0.13857	0.131975	1	1	FALSE	286.392	313.044	358.762
sgRNA1093	SPV_0956	SPV_0956	-0.0246146	0.166438	1	1	FALSE	204.238	215.531	231.165
sgRNA1094	SPV_0961	lafA	-0.772816	0.219416	1	1	FALSE	121.899	207.241	175.88
sgRNA1095	SPV_0962	SPV_0962	0.373448	0.107973	1	1	FALSE	308.936	228.295	211.516
sgRNA1096	SPV_0968	SPV_0968	1.05622	0.176067	0.749479	1	FALSE	425.015	194.467	166.426
sgRNA1097	SPV_0969	SPV_0969	0.27254	0.101049	1	1	FALSE	300.986	244.574	223.492
sgRNA1098	SPV_0977	SPV_0977	0.200283	0.101127	1	1	FALSE	457.968	404.006	359.12
sgRNA1099	SPV_0978	SPV_0978	0.351798	0.139828	1	1	FALSE	270.592	225.297	182.74
sgRNA1100	SPV_1641,SPV_2401,SPV_0986,SPV_2272	SPV_1641,SPV_2401,SPV_0986,SPV_2272	0.079453	0.0998956	1	1	FALSE	331.555	319.368	315.184
sgRNA1101	SPV_0993,SPV_0992	SPV_0993,SPV_0992	0.0458279	0.102368	1	1	FALSE	393.697	378.008	363.92
sgRNA1102	SPV_0993	SPV_0993	-0.0463475	0.089516	1	1	FALSE	506.134	561.234	510.046
sgRNA1103	SPV_1003	SPV_1003	0.0548244	0.102009	1	1	FALSE	318.639	308.375	318.288
sgRNA1104	SPV_1009	serB	0.0427596	0.118056	1	1	FALSE	227.879	205.099	183.284
sgRNA1105	SPV_1011	glxK	0.0709219	0.0963054	1	1	FALSE	281.341	274.201	279.264
sgRNA1106	SPV_1013	SPV_1013	0.127944	0.099662	1	1	FALSE	661.338	585.262	581.109
sgRNA1107	SPV_1021	SPV_1021	0.311405	0.113828	1	1	FALSE	403.837	308.871	303.638
sgRNA1108	SPV_1024	lplA	-0.0337681	0.107288	1	1	FALSE	369.401	369.718	343.268
sgRNA1109	SPV_1025	acoL	-0.0891167	0.106155	1	1	FALSE	262.083	290.915	240.457
sgRNA1110	SPV_1026	acoC	-0.0555561	0.118257	1	1	FALSE	371.549	386.297	351.596
sgRNA1111	SPV_1027	acoB	0.00143967	0.096842	1	1	FALSE	345.038	353.968	332.712
sgRNA1112	SPV_1029	pdrM	0.104478	0.130585	1	1	FALSE	260.213	251.381	213.228
sgRNA1113	SPV_1046	lacG-2	0.0193325	0.124487	1	1	FALSE	147.792	134.669	146.134
sgRNA1114	SPV_1047	lacE-2	-0.125756	0.117737	1	1	FALSE	270.359	286.957	291.645
sgRNA1115	SPV_1048	lacF-2	0.147176	0.115831	1	1	FALSE	441.567	393.035	355.804
sgRNA1116	SPV_1049	lacT	-0.073171	0.114406	1	1	FALSE	294.113	288.576	282.332
sgRNA1117	SPV_1054	SPV_1054	0.171345	0.0847784	1	1	FALSE	695.653	623.879	576.879
sgRNA1118	SPV_1057,SPV_0560,SPV_0561,SPV_0562	SPV_1057,SPV_0560,SPV_0561,bgaA	-0.00251611	0.0780542	1	1	FALSE	584.321	580.113	539.163
sgRNA1119	SPV_1059	SPV_1059	0.0400629	0.112429	1	1	FALSE	365.484	359.116	353.649
sgRNA1120	SPV_1061	pphA	0.194393	0.169273	1	1	FALSE	276.008	256.15	257.838
sgRNA1121	SPV_1062	recN	-2.00524	0.170412	3.65988e-09	7.83214e-08	TRUE	67.3449	235.33	872.003
sgRNA1122	SPV_1063	ahrC	-0.555389	0.115828	1	1	FALSE	288.242	416.969	512.336
sgRNA1123	SPV_1066	xseB	-0.109524	0.141796	1	1	FALSE	203.667	204.754	280.439
sgRNA1124	SPV_1069	SPV_1069	0.0564416	0.138813	1	1	FALSE	176.471	176.993	143.956
sgRNA1125	SPV_1070	truB	-0.156695	0.141777	1	1	FALSE	237.604	280.19	276.771
sgRNA1126	SPV_1071	SPV_1071	0.00286028	0.124613	1	1	FALSE	252.747	260.079	240.6
sgRNA1127	SPV_1076	srtA	-0.584737	0.180649	1	1	FALSE	378.859	567.589	719.227
sgRNA1128	SPV_1092	SPV_1092	0.097726	0.192884	1	1	FALSE	77.9491	77.234	60.3969
sgRNA1129	SPV_1094,SPV_1095	SPV_1094,SPV_1095	0.0806857	0.0960792	1	1	FALSE	502.728	492.49	463.198
sgRNA1130	SPV_1095	SPV_1095	0.0176553	0.108904	1	1	FALSE	348.276	336.186	288.128
sgRNA1131	SPV_1102	SPV_1102	-2.14702	0.193298	2.95681e-09	6.51367e-08	TRUE	71.5855	268.603	393.418
sgRNA1132	SPV_1103	SPV_1103	-2.10322	0.136318	5.82234e-16	2.81351e-14	TRUE	64.4923	338.217	479.358
sgRNA1133	SPV_1108	SPV_1108	0.0921316	0.103282	1	1	FALSE	287.386	270.356	273.427
sgRNA1134	SPV_1109	SPV_1109	-0.0918949	0.134112	1	1	FALSE	523.808	553.656	516.371
sgRNA1135	SPV_1110	SPV_1110	0.019787	0.142604	1	1	FALSE	267.401	272.729	258.002
sgRNA1136	SPV_1111	SPV_1111	0.06425	0.10759	1	1	FALSE	377.755	368.094	318.507
sgRNA1137	SPV_1112	SPV_1112	0.119776	0.0950854	1	1	FALSE	609.814	578.656	571.132
sgRNA1138	SPV_1113	SPV_1113	0.16946	0.139508	1	1	FALSE	548.677	501.523	499.991
sgRNA1139	SPV_1115	leuB	0.420398	0.103217	1	1	FALSE	461.661	328.27	312.824
sgRNA1140	SPV_1116,SPV_2313	leuA,SPV_2313	-0.194441	0.113668	1	1	FALSE	409.052	455.952	413.179
sgRNA1141	SPV_1117	SPV_1117	0.100542	0.125288	1	1	FALSE	237.195	216.255	179.632
sgRNA1142	SPV_1130	licD2	1.05631	0.140758	0.689113	1	FALSE	571.202	261.66	185.458
sgRNA1143	SPV_1135	nth	-0.0669305	0.151067	1	1	FALSE	174.256	176.569	146.447
sgRNA1144	SPV_1137	SPV_1137	-0.00896406	0.09371	1	1	FALSE	639.145	654.772	589.52
sgRNA1145	SPV_1147	tRNA-Arg-2	0.0105738	0.105672	1	1	FALSE	340.437	333.034	287.738
sgRNA1146	SPV_1155	efeU	0.00783116	0.126916	1	1	FALSE	524.432	541.049	482.901
sgRNA1147	SPV_1156	efeB	0.147664	0.1089	1	1	FALSE	318.511	290.056	276.19
sgRNA1148	SPV_1159	SPV_1159	0.0322128	0.101623	1	1	FALSE	497.906	503.181	465.183
sgRNA1149	SPV_1160	SPV_1160	0.127696	0.13477	1	1	FALSE	269.274	257.794	234.089
sgRNA1150	SPV_1162	SPV_1162	0.086102	0.099956	1	1	FALSE	433.491	416.03	403.378
sgRNA1151	SPV_1164	cdd-2	0.0658066	0.102811	1	1	FALSE	258.88	248.816	260.027
sgRNA1152	SPV_1165	SPV_1165	0.179433	0.11132	1	1	FALSE	360.904	315.801	364.941
sgRNA1153	SPV_1166	SPV_1166	0.159173	0.102478	1	1	FALSE	386.709	354.941	344.649
sgRNA1154	SPV_1167	appD	0.0750897	0.0874412	1	1	FALSE	498.956	473.812	435.404
sgRNA1155	SPV_1168	appC	0.256224	0.113564	1	1	FALSE	344.097	287.482	273.471
sgRNA1156	SPV_1169	appB	0.281296	0.104928	1	1	FALSE	329.967	259.466	236.478
sgRNA1157	SPV_1174	SPV_1174	0.162434	0.151173	1	1	FALSE	241.694	199.78	196.567
sgRNA1158	SPV_1175	SPV_1175	0.081027	0.155466	1	1	FALSE	215.191	207.774	205.616
sgRNA1159	SPV_1176	SPV_1176	-0.0260095	0.155247	1	1	FALSE	184.384	188.536	164.596
sgRNA1160	SPV_1177	SPV_1177	0.0352766	0.0912419	1	1	FALSE	550.457	520.037	503.118
sgRNA1161	SPV_1178	ptrB	0.0178963	0.165113	1	1	FALSE	155.57	141.596	148.444
sgRNA1162	SPV_1179	lanL	-0.00983903	0.10523	1	1	FALSE	292.829	310.672	282.841
sgRNA1163	SPV_1186	SPV_1186	0.113031	0.142033	1	1	FALSE	226.138	241.107	203.139
sgRNA1164	SPV_1189	SPV_1189	0.211903	0.101587	1	1	FALSE	294.626	276.326	300.502
sgRNA1165	SPV_1191	SPV_1191	0.0891854	0.0866471	1	1	FALSE	583.746	544.664	537.116
sgRNA1166	SPV_1192	SPV_1192	-0.0199558	0.159791	1	1	FALSE	158.784	152.334	160.519
sgRNA1167	SPV_1206	SPV_1206	0.222264	0.117115	1	1	FALSE	532.046	435.206	384.794
sgRNA1168	SPV_1207	tyrA	0.278023	0.119253	1	1	FALSE	400.244	339.337	297.5
sgRNA1169	SPV_1208	aroC	0.212283	0.206369	1	1	FALSE	165.479	135.589	135.701
sgRNA1170	SPV_1209	aroB	0.114496	0.122084	1	1	FALSE	435.086	383.399	326.674
sgRNA1171	SPV_1210	aroE	-0.0962942	0.117051	1	1	FALSE	166.331	169.938	152.944
sgRNA1172	SPV_1211	aroD	-0.293148	0.0997652	1	1	FALSE	210.232	244.544	226.837
sgRNA1173	SPV_1223	SPV_1223	0.156368	0.123222	1	1	FALSE	186.023	172.332	152.352
sgRNA1174	SPV_1225	SPV_1225	0.200916	0.115216	1	1	FALSE	403.304	365.218	379.417
sgRNA1175	SPV_1227	phoU2	0.300401	0.0991643	1	1	FALSE	504.686	412.824	292.01
sgRNA1176	SPV_1228	pstB2-2	-0.424131	0.226146	1	1	FALSE	45.7278	68.804	90.0913
sgRNA1177	SPV_1229	pstB2-1	-0.498603	0.0987145	1	1	FALSE	270.204	369.377	516.366
sgRNA1178	SPV_1230	pstA2	-0.44827	0.115034	1	1	FALSE	369.988	516.996	570.235
sgRNA1179	SPV_1231	pstC2	-0.398364	0.153612	1	1	FALSE	259.478	371.376	452.817
sgRNA1180	SPV_1232	pstS2	-0.265319	0.108115	1	1	FALSE	373.713	482.283	597.867
sgRNA1181	SPV_1233	SPV_1233	0.568349	0.142321	1	1	FALSE	176.861	128.723	121.85
sgRNA1182	SPV_1237	SPV_1237	0.110471	0.0987617	1	1	FALSE	351.953	334.084	347.469
sgRNA1183	SPV_1241	SPV_1241	0.0759903	0.184452	1	1	FALSE	175.124	148.385	151.023
sgRNA1184	SPV_1242	SPV_1242	-0.00879803	0.118581	1	1	FALSE	247.734	248.987	247.613
sgRNA1185	SPV_1248	cbpM	0.152369	0.175768	1	1	FALSE	123.159	111.583	96.96
sgRNA1186	SPV_1252	SPV_1252	-0.00668627	0.143345	1	1	FALSE	200.54	189.819	182.599
sgRNA1187	SPV_1253	SPV_1253	0.0918396	0.139273	1	1	FALSE	254.844	262.645	213.82
sgRNA1188	SPV_1254	SPV_1254	-0.04803	0.11526	1	1	FALSE	345.931	358.894	337.521
sgRNA1189	SPV_1255	SPV_1255	0.109477	0.100322	1	1	FALSE	335.541	322.666	353.541
sgRNA1190	SPV_1256,SPV_1258	SPV_1256,SPV_1258	0.0318694	0.120643	1	1	FALSE	498.329	478.851	486.346
sgRNA1191	SPV_1257	SPV_1257	0.117396	0.123131	1	1	FALSE	226.098	196.518	172.259
sgRNA1192	SPV_1261	SPV_1261	0.074072	0.118028	1	1	FALSE	340.923	300.914	337.283
sgRNA1193	SPV_1263	SPV_1263	-0.173847	0.109745	1	1	FALSE	348.511	383.399	358.157
sgRNA1194	SPV_1264	SPV_1264	-0.0393914	0.114292	1	1	FALSE	339.345	347.336	337.466
sgRNA1195	SPV_1265	SPV_1265	0.144975	0.113257	1	1	FALSE	442.074	392.886	405.07
sgRNA1196	SPV_1266	SPV_1266	0.0482561	0.107411	1	1	FALSE	310.658	295.111	308.043
sgRNA1197	SPV_1267	SPV_1267	-0.0583812	0.134905	1	1	FALSE	319.533	332.183	251.154
sgRNA1198	SPV_1272	SPV_1272	0.101587	0.108779	1	1	FALSE	397.503	343.262	295.972
sgRNA1199	SPV_1275	nagR	0.148174	0.117564	1	1	FALSE	245.138	234.708	226.778
sgRNA1200	SPV_1276	SPV_1276	0.212003	0.0786247	1	1	FALSE	757.619	651.34	526.499
sgRNA1201	SPV_1277	SPV_1277	0.178191	0.0881712	1	1	FALSE	644.221	562.06	522.291
sgRNA1202	SPV_1279	SPV_1279	-0.0125791	0.0920071	1	1	FALSE	614.801	613.581	636.842
sgRNA1203	SPV_1284	SPV_1284	0.0369729	0.122355	1	1	FALSE	262.228	254.492	266.864
sgRNA1204	SPV_1296	pdxT	0.105834	0.112863	1	1	FALSE	265.724	243.716	215.943
sgRNA1205	SPV_1297	pdxS	-0.0196627	0.0833838	1	1	FALSE	730.736	751.744	636.834
sgRNA1206	SPV_1299	SPV_1299	0.133898	0.12566	1	1	FALSE	200.249	179.056	162.235
sgRNA1207	SPV_1312	yfmL	0.060016	0.112434	1	1	FALSE	489.181	415.549	407.793
sgRNA1208	SPV_2155,SPV_0359,SPV_2179,SPV_0499,SPV_1315,SPV_2347,SPV_1421,SPV_2361,SPV_0743,SPV_2229	SPV_2155,SPV_0359,SPV_2179,SPV_0499,SPV_1315,SPV_2347,SPV_1421,SPV_2361,SPV_0743,SPV_2229	-0.0703318	0.132532	1	1	FALSE	196.517	212.905	225.128
sgRNA1209	SPV_1319	SPV_1319	0.0884773	0.0990539	1	1	FALSE	412.374	397.326	340.938
sgRNA1210	SPV_1321,SPV_1322	mucB,SPV_1322	-0.0366732	0.111272	1	1	FALSE	335.235	328.673	326.326
sgRNA1211	SPV_1322	SPV_1322	0.0580981	0.116453	1	1	FALSE	384.673	384.98	332.723
sgRNA1212	SPV_1323	SPV_1323	0.112156	0.127927	1	1	FALSE	299.583	266.772	264.04
sgRNA1213	SPV_1343	SPV_1343	0.118494	0.132731	1	1	FALSE	296.973	277.703	308.566
sgRNA1214	SPV_1344	SPV_1344	0.515541	0.136399	1	1	FALSE	234.954	168.38	184.686
sgRNA1215	SPV_1347	SPV_1347	0.476594	0.122337	1	1	FALSE	258.8	182.123	168.418
sgRNA1216	SPV_1348	SPV_1348	-2.59989	0.767588	0.0371323	0.285252	FALSE	0.800922	3.95257	27.8685
sgRNA1217	SPV_1361,SPV_2355	SPV_1361,SPV_2355	-0.232448	0.122602	1	1	FALSE	272.66	296.264	287.974
sgRNA1218	SPV_1362	SPV_1362	0.193761	0.111568	1	1	FALSE	321.935	272.729	293.185
sgRNA1219	SPV_1372	SPV_1372	-2.31887	0.403623	0.0010847	0.0104159	TRUE	8.7853	32.568	558.037
sgRNA1220	SPV_1376	pclA	0.123191	0.131115	1	1	FALSE	245.678	217.971	236.17
sgRNA1221	SPV_1377	mga1	0.194441	0.142173	1	1	FALSE	166.448	137.626	166.395
sgRNA1222	SPV_1393	SPV_1393	-0.689422	0.160234	1	1	FALSE	241.33	418.78	493.099
sgRNA1223	SPV_1397	aldR	-0.308668	0.108586	1	1	FALSE	342.617	423.384	498.885
sgRNA1224	SPV_1400	SPV_1400	-0.590908	0.168634	1	1	FALSE	84.5858	143.411	125.265
sgRNA1225	SPV_1414	oxlT	-0.117752	0.11883	1	1	FALSE	223.522	235.991	218.758
sgRNA1226	SPV_1425	SPV_1425	0.151198	0.123758	1	1	FALSE	454.187	402.475	375.741
sgRNA1227	SPV_1426	SPV_1426	0.137009	0.124549	1	1	FALSE	352.211	286.808	270.455
sgRNA1228	SPV_1433	SPV_1433	-0.222112	0.165672	1	1	FALSE	218.139	241.897	224.33
sgRNA1229	SPV_1434	ybgI	-1.15491	0.140031	0.268607	1	FALSE	195.518	460.87	718.739
sgRNA1230	SPV_1440	SPV_1440	-0.00462674	0.106119	1	1	FALSE	816.774	815.247	750.571
sgRNA1231	SPV_1441	SPV_1441	0.0862536	0.138484	1	1	FALSE	199.388	191.304	173.978
sgRNA1232	SPV_1454	SPV_1454	0.0481533	0.150414	1	1	FALSE	173.855	176.569	154.716
sgRNA1233	SPV_1457	dtd	-0.0213971	0.124052	1	1	FALSE	366.557	373.224	351.328
sgRNA1234	SPV_1465	SPV_1465	-0.0773299	0.162468	1	1	FALSE	168.626	183.399	179.389
sgRNA1235	SPV_1469	SPV_1469	-0.108373	0.105354	1	1	FALSE	351.42	387.955	379.924
sgRNA1236	SPV_1475	ylmH	-1.07606	0.295935	0.797169	1	FALSE	20.2468	48.3267	246.756
sgRNA1237	SPV_1476	ylmG	-1.66408	0.391071	0.0894888	0.641408	FALSE	28.0409	92.4511	483.302
sgRNA1238	SPV_1477	sepF	-1.77615	0.340749	0.0227398	0.186144	FALSE	12.7971	29.4162	184.616
sgRNA1239	SPV_1478	ylmE	1.06285	0.125455	0.616401	1	FALSE	704.066	347.336	312.44
sgRNA1240	SPV_1482	SPV_1482	0.392513	0.291399	1	1	FALSE	79.0597	64.0854	48.4227
sgRNA1241	SPV_1488	nanK	0.0266336	0.119782	1	1	FALSE	476.52	474.168	448.628
sgRNA1242	SPV_1490	SPV_1490	-0.0274807	0.139037	1	1	FALSE	235.917	219.571	209.475
sgRNA1243	SPV_1491	SPV_1491	0.0742065	0.114916	1	1	FALSE	588.957	555.732	578.264
sgRNA1244	SPV_1492	yjgK	0.0454382	0.0988011	1	1	FALSE	424.159	401.322	399.83
sgRNA1245	SPV_1493	satC	-0.0340189	0.188998	1	1	FALSE	142.7	155.326	142.675
sgRNA1246	SPV_1494	satB	0.0938746	0.121062	1	1	FALSE	360.485	356.455	369.092
sgRNA1247	SPV_1495	satA	0.31553	0.150068	1	1	FALSE	372.925	275.89	213.61
sgRNA1248	SPV_1496	nanP	0.371036	0.137881	1	1	FALSE	309.276	234.279	207.407
sgRNA1249	SPV_1497	nanE-1	0.296376	0.13554	1	1	FALSE	132.931	112.412	117.236
sgRNA1250	SPV_1498	SPV_1498	0.044093	0.116419	1	1	FALSE	546.341	519.761	483.921
sgRNA1251	SPV_1499	nanB	0.0913301	0.121087	1	1	FALSE	434.497	437.693	355.517
sgRNA1252	SPV_1500	SPV_1500	0.120143	0.214281	1	1	FALSE	66.0623	61.6601	43.7118
sgRNA1253	SPV_1501	ycjO	0.0082114	0.0856726	1	1	FALSE	599.169	640.854	619.422
sgRNA1254	SPV_1502	SPV_1502	0.137799	0.0998078	1	1	FALSE	591.203	526.483	523.683
sgRNA1255	SPV_1503	SPV_1503	0.148692	0.116954	1	1	FALSE	334.208	307.546	272.046
sgRNA1256	SPV_1507	recG	0.057644	0.119751	1	1	FALSE	423.845	383.399	288.853
sgRNA1257	SPV_1510	aroF	-2.18598	0.309596	0.000127766	0.00144995	TRUE	15.4311	67.9751	110.095
sgRNA1258	SPV_1511	aroG	-1.56201	0.381737	0.140958	0.983268	FALSE	10.9783	25.7447	33.5219
sgRNA1259	SPV_1513,SPV_2380	SPV_1513,SPV_2380	0.0917418	0.0931782	1	1	FALSE	469.607	456.127	448.445
sgRNA1260	SPV_1514	SPV_1514	0.0746495	0.153658	1	1	FALSE	239.445	241.229	225.71
sgRNA1261	SPV_1515	SPV_1515	0.0773591	0.0898774	1	1	FALSE	473.633	461.205	448.174
sgRNA1262	SPV_1516	SPV_1516	0.0250038	0.0788864	1	1	FALSE	683.419	701.186	673.575
sgRNA1263	SPV_1517	SPV_1517	0.0933177	0.0801417	1	1	FALSE	523.04	491.576	457.517
sgRNA1264	SPV_1520	frp	-1.69285	0.186199	0.000198445	0.00218582	TRUE	31.1979	97.8178	247.517
sgRNA1265	SPV_1529,SPV_2385	SPV_1529,SPV_2385	0.0786066	0.0828925	1	1	FALSE	636.565	617.578	569.52
sgRNA1266	SPV_1533	SPV_1533	0.00138155	0.130131	1	1	FALSE	177.287	190.51	216.164
sgRNA1267	SPV_1539,SPV_2387	SPV_1539,SPV_2387	0.133041	0.096246	1	1	FALSE	600.642	526.907	475.349
sgRNA1268	SPV_1540	SPV_1540	0.215438	0.102174	1	1	FALSE	601.71	561.265	449.881
sgRNA1269	SPV_1544	sun	-0.0173444	0.0888409	1	1	FALSE	363.954	348.165	348.602
sgRNA1270	SPV_1552	SPV_1552	-1.20292	0.162723	0.212387	1	FALSE	196.6	505.328	1243.12
sgRNA1271	SPV_1553	SPV_1553	-1.02654	0.134347	0.843423	1	FALSE	243.712	559.684	1032.24
sgRNA1272	SPV_1554	rsfA	-0.634977	0.11849	1	1	FALSE	353.357	583.072	888.819
sgRNA1273	SPV_1564	SPV_1564	-0.127153	0.132917	1	1	FALSE	449.327	451.786	592.183
sgRNA1274	SPV_1568	queF	0.454526	0.104001	1	1	FALSE	496.31	354.797	327.088
sgRNA1275	SPV_1570	SPV_1570	-0.0157772	0.138727	1	1	FALSE	202.354	205.583	218.127
sgRNA1276	SPV_1571	pepF2	-0.00771163	0.100428	1	1	FALSE	361.307	331.983	304.868
sgRNA1277	SPV_1572	SPV_1572	-0.127055	0.107917	1	1	FALSE	613.434	631.019	577.518
sgRNA1278	SPV_1573	prmA	-0.205552	0.111418	1	1	FALSE	456.661	503.228	511.937
sgRNA1279	SPV_1574,SPV_1575	SPV_1574,SPV_1575	-0.201766	0.103262	1	1	FALSE	298.625	336.56	363.634
sgRNA1280	SPV_1575	SPV_1575	-0.0488772	0.112462	1	1	FALSE	388.519	416.205	415.256
sgRNA1281	SPV_1577	hicB	0.0241669	0.114216	1	1	FALSE	332.162	355.269	333.474
sgRNA1282	SPV_1587	mga2	0.148808	0.113563	1	1	FALSE	303.596	276.68	261.237
sgRNA1283	SPV_1605	SPV_1605	-0.463678	0.110274	1	1	FALSE	185.997	255.73	315.9
sgRNA1284	SPV_1618	SPV_1618	0.000732445	0.12893	1	1	FALSE	305.176	306.769	324.515
sgRNA1285	SPV_1621	SPV_1621	0.00654554	0.353995	1	1	FALSE	832.893	851.619	993.743
sgRNA1286	SPV_1622	SPV_1622	0.00805501	0.289163	1	1	FALSE	867.548	922.409	987.079
sgRNA1287	SPV_1627	SPV_1627	0.0750445	0.119027	1	1	FALSE	321.478	309.882	315.503
sgRNA1288	SPV_1633	galT-2	0.0201935	0.137114	1	1	FALSE	235.334	241.897	223.289
sgRNA1289	SPV_1634	galK	0.186531	0.179349	1	1	FALSE	293.159	274.61	277.941
sgRNA1290	SPV_1639	sczA	-2.7415	0.234259	1.05315e-13	3.94404e-12	TRUE	12.4055	93.5016	909.745
sgRNA1291	SPV_1640	pnuC	0.0602952	0.102322	1	1	FALSE	413.984	406.324	354.444
sgRNA1292	SPV_1648	SPV_1648	-0.0882925	0.0893489	1	1	FALSE	609.973	649.012	638.404
sgRNA1293	SPV_1653	yidD	0.127984	0.0976984	1	1	FALSE	719.837	658.498	612.009
sgRNA1294	SPV_1654	rluB	0.407754	0.121289	1	1	FALSE	652.912	541.049	375.927
sgRNA1295	SPV_1657	xerD	0.568228	0.113065	1	1	FALSE	543.588	378.209	330.952
sgRNA1296	SPV_1664	treP	0.00717115	0.0859529	1	1	FALSE	542.432	555.732	514.024
sgRNA1297	SPV_1667	amiF	-2.7799	0.207701	1.03922e-17	6.48645e-16	TRUE	68.2756	404.473	2298.8
sgRNA1298	SPV_1668	amiE	-2.87394	0.182998	1.3094e-24	1.78316e-22	TRUE	69.9101	586.224	2892.72
sgRNA1299	SPV_1669	amiD	-2.8018	0.19322	1.10827e-20	8.30097e-19	TRUE	35.2048	243.735	1108.41
sgRNA1300	SPV_1670	amiC	-2.83714	0.194253	3.15482e-21	2.77995e-19	TRUE	59.9402	428.637	2107.97
sgRNA1301	SPV_1673	gtfA	0.186819	0.116136	1	1	FALSE	260.319	222.925	202.744
sgRNA1302	SPV_0552,SPV_2196,SPV_1674,SPV_1942,SPV_1949,SPV_1939,SPV_0690	SPV_0552,SPV_2196,SPV_1674,SPV_1942,SPV_1949,SPV_1939,SPV_0690	-1.66551	0.162393	4.16522e-05	0.000503185	TRUE	183.014	621.943	2043.97
sgRNA1303	SPV_1675	msmG	0.115377	0.0903353	1	1	FALSE	450.659	421.283	453.86
sgRNA1304	SPV_1676	msmF	0.0448813	0.100368	1	1	FALSE	488.5	485.376	417.234
sgRNA1305	SPV_1677	msmE	0.659473	0.12779	1	1	FALSE	583.717	376.108	345.588
sgRNA1306	SPV_1678	agaN	0.258487	0.110974	1	1	FALSE	349.523	296.064	259.632
sgRNA1307	SPV_1697,SPV_1811	tRNA-Asp-1,tRNA-Asp-2	-1.52306	0.387914	0.17753	1	FALSE	25.8443	80.8012	568.458
sgRNA1308	SPV_1698,SPV_1812,SPV_1889	tRNA-Val-1,tRNA-Val-2,tRNA-Val-3	-1.08071	0.183327	0.659765	1	FALSE	177.465	391.866	784.426
sgRNA1309	SPV_1707	SPV_1707	0.0455127	0.16436	1	1	FALSE	128.248	111.361	116.033
sgRNA1310	SPV_0048,SPV_1708,SPV_2403,SPV_1666,SPV_2400,SPV_2271	SPV_0048,SPV_1708,SPV_2403,SPV_1666,SPV_2400,SPV_2271	0.00369601	0.103601	1	1	FALSE	337.083	318.376	310.921
sgRNA1311	SPV_1712	ydfG	0.153738	0.0952377	1	1	FALSE	526.211	485.376	446.936
sgRNA1312	SPV_1713	SPV_1713	-0.112231	0.122776	1	1	FALSE	190.004	193.676	181.59
sgRNA1313	SPV_1714	SPV_1714	-0.0148227	0.0951958	1	1	FALSE	395.758	413.929	436.498
sgRNA1314	SPV_1731	SPV_1731	0.0208641	0.0975177	1	1	FALSE	470.744	461.688	435.143
sgRNA1315	SPV_1732,SPV_2416,SPV_1733	SPV_1732,SPV_2416,SPV_1733	-0.0073973	0.119188	1	1	FALSE	441.876	419.396	395.95
sgRNA1316	SPV_1736	SPV_1736	0.090982	0.133048	1	1	FALSE	316.167	303.966	244.142
sgRNA1317	SPV_1762	endA	-0.0100687	0.12801	1	1	FALSE	211.238	210.34	271.509
sgRNA1318	SPV_1763	epuA	-0.189709	0.141022	1	1	FALSE	202.287	239.838	262.914
sgRNA1319	SPV_1775	lysA	0.100116	0.143171	1	1	FALSE	129.336	118.716	124.013
sgRNA1320	SPV_1786	SPV_1786	-0.0731369	0.109504	1	1	FALSE	491.607	530.979	435.648
sgRNA1321	SPV_1789	diiA	0.0591696	0.108104	1	1	FALSE	384.043	363.501	360.059
sgRNA1322	SPV_1795	SPV_1795	0.336556	0.120946	1	1	FALSE	483.615	367.231	333.467
sgRNA1323	SPV_1826	nadC	0.0742759	0.103587	1	1	FALSE	384.464	337.236	334.306
sgRNA1324	SPV_1836	SPV_1836	-0.319123	0.141011	1	1	FALSE	404.486	552.652	631.466
sgRNA1325	SPV_1837	SPV_1837	-0.329268	0.127328	1	1	FALSE	504.909	687.747	753.683
sgRNA1326	SPV_1842	ulaF	-0.00323605	0.130036	1	1	FALSE	282.54	289.96	276.519
sgRNA1327	SPV_1843	ulaE	0.113107	0.105027	1	1	FALSE	450.259	423.716	458.686
sgRNA1328	SPV_1844	ulaD	0.104744	0.105797	1	1	FALSE	543.194	535.969	493.946
sgRNA1329	SPV_1845	ulaC	0.0666034	0.0883127	1	1	FALSE	564.178	531.198	567.993
sgRNA1330	SPV_1846	ulaB	0.179521	0.108173	1	1	FALSE	288.294	258.305	234.163
sgRNA1331	SPV_1847	ulaA	0.033049	0.101885	1	1	FALSE	485.349	450.957	438.828
sgRNA1332	SPV_1848	SPV_1848	0.0306648	0.0860611	1	1	FALSE	499.557	491.22	445.09
sgRNA1333	SPV_1850	yidC2	-2.63137	0.155815	1.18694e-25	1.91788e-23	TRUE	126.746	693.383	3799.19
sgRNA1334	SPV_1852	SPV_1852	-0.27812	0.149249	1	1	FALSE	227.495	264.312	240.991
sgRNA1335	SPV_1868	tgt	0.113995	0.17263	1	1	FALSE	108.848	102.767	94.0101
sgRNA1336	SPV_1873	SPV_1873	-0.00238769	0.0999287	1	1	FALSE	411.793	417.063	400.681
sgRNA1337	SPV_1875	SPV_1875	0.053903	0.119033	1	1	FALSE	220.338	207.241	202.39
sgRNA1338	SPV_1876	SPV_1876	0.0862648	0.117277	1	1	FALSE	166.418	161.333	176.323
sgRNA1339	SPV_1882	tRNA-Trp-1	-2.54969	0.239309	9.43888e-11	2.57081e-09	TRUE	24.634	196.458	1051.2
sgRNA1340	SPV_1883,SPV_0755	tRNA-Tyr-2,tRNA-Tyr-1	-2.15313	0.334091	0.000557405	0.00564184	TRUE	29.0034	133.386	1692.11
sgRNA1341	SPV_1682,SPV_1683,SPV_1684,SPV_1685,SPV_1884	tRNA-Ser-2,tRNA-Ile-1,tRNA-Gly-1,tRNA-Phe-1,tRNA-Phe-2	-0.750569	0.141721	1	1	FALSE	224.993	382.609	595.783
sgRNA1342	SPV_1682,SPV_1683,SPV_1684,SPV_1685,SPV_1686,SPV_1885	tRNA-Ser-2,tRNA-Ile-1,tRNA-Gly-1,tRNA-Phe-1,tRNA-fMet-1,tRNA-fMet-2	-2.82782	0.216522	3.12707e-17	1.71804e-15	TRUE	19.9627	135.525	634.964
sgRNA1343	SPV_1682,SPV_1683,SPV_1684,SPV_1685,SPV_1686,SPV_1687,SPV_1886	tRNA-Ser-2,tRNA-Ile-1,tRNA-Gly-1,tRNA-Phe-1,tRNA-fMet-1,tRNA-Ser-3,tRNA-Ser-4	-2.33669	0.20809	1.33062e-10	3.55941e-09	TRUE	42.3139	236.381	867.257
sgRNA1344	SPV_1682,SPV_1683,SPV_1684,SPV_1888	tRNA-Ser-2,tRNA-Ile-1,tRNA-Gly-1,tRNA-Gly-4	-0.948441	0.209568	1	1	FALSE	35.576	64.0854	499.312
sgRNA1345	SPV_1895	SPV_1895	-2.7798	0.182441	1.74784e-22	2.01405e-20	TRUE	43.2144	246.886	1805.03
sgRNA1346	SPV_1900	patB	0.135014	0.0781971	1	1	FALSE	693.778	627.171	617.02
sgRNA1347	SPV_1903	hexA	-0.0309319	0.106092	1	1	FALSE	553.049	562.092	477.459
sgRNA1348	SPV_1906,SPV_1967	SPV_1906,SPV_1967	0.0231211	0.0991752	1	1	FALSE	592.059	578.87	585.309
sgRNA1349	SPV_1907	SPV_1907	0.105456	0.100476	1	1	FALSE	415.779	386.297	367.006
sgRNA1350	SPV_1910	pstS1	-0.102307	0.0991615	1	1	FALSE	512.118	532.056	473.118
sgRNA1351	SPV_1911	pstC1	0.0983694	0.115708	1	1	FALSE	572.886	511.463	509.339
sgRNA1352	SPV_1912	pstA1	0.116545	0.119847	1	1	FALSE	299.831	279.454	275.437
sgRNA1353	SPV_1913	pstB1	0.0391017	0.115611	1	1	FALSE	300.576	296.271	306.753
sgRNA1354	SPV_1914	phoU1	0.0803881	0.104123	1	1	FALSE	314.131	295.94	321.939
sgRNA1355	SPV_1915,SPV_2435	SPV_1915,SPV_2435	0.208119	0.103923	1	1	FALSE	324.293	272.035	287.467
sgRNA1356	SPV_1916	SPV_1916	0.042933	0.182818	1	1	FALSE	122.895	115.43	130.428
sgRNA1357	SPV_1917	SPV_1917	-1.03918	0.219272	0.858181	1	FALSE	150.244	353.986	690.004
sgRNA1358	SPV_1920	SPV_1920	0.0646051	0.109035	1	1	FALSE	357.557	344.849	326.439
sgRNA1359	SPV_1921	SPV_1921	-0.00183799	0.121555	1	1	FALSE	447.954	465.569	426.62
sgRNA1360	SPV_1922	hipO	-2.13697	0.190602	2.44395e-09	5.46424e-08	TRUE	76.194	264.746	1640.22
sgRNA1361	SPV_1930	SPV_1930	0.00924008	0.0990861	1	1	FALSE	385.857	397.119	410.583
sgRNA1362	SPV_1931	SPV_1931	-0.00116632	0.133178	1	1	FALSE	202.478	211.386	189.054
sgRNA1363	SPV_1935	malC	0.171139	0.144135	1	1	FALSE	402.207	378.837	390.656
sgRNA1364	SPV_1936	malD	0.0707348	0.136922	1	1	FALSE	369.382	356.134	325.005
sgRNA1365	SPV_1944	SPV_1944	0.074904	0.130196	1	1	FALSE	256.244	243.686	238.894
sgRNA1366	SPV_1945	SPV_1945	-0.0793933	0.160537	1	1	FALSE	92.4887	99.6048	89.5009
sgRNA1367	SPV_1946	SPV_1946	-0.0613221	0.145994	1	1	FALSE	289.024	315.174	291.361
sgRNA1368	SPV_1947	SPV_1947	-0.0260654	0.0933536	1	1	FALSE	454.382	464.286	436.059
sgRNA1369	SPV_1953	SPV_1953	-0.0261849	0.0976593	1	1	FALSE	287.337	308.301	247.454
sgRNA1370	SPV_2177,SPV_1955,SPV_0433	SPV_2177,SPV_1955,SPV_0433	-0.0384559	0.100067	1	1	FALSE	555.441	544.2	565.899
sgRNA1371	SPV_1957	tktC	0.0754872	0.11629	1	1	FALSE	257.54	248.865	239.14
sgRNA1372	SPV_1958	tktN	0.24417	0.115324	1	1	FALSE	359.097	323.205	330.279
sgRNA1373	SPV_1959	ulaA2	0.0684049	0.117387	1	1	FALSE	408.075	384.19	366.592
sgRNA1374	SPV_1960	ulaB2	0.0345578	0.0913927	1	1	FALSE	602.522	608.46	641.354
sgRNA1375	SPV_1961	ulaR2	0.0310964	0.103619	1	1	FALSE	545.689	516.609	514.459
sgRNA1376	SPV_1973	SPV_1973	0.278404	0.104203	1	1	FALSE	526.732	480.115	402.432
sgRNA1377	SPV_1976	arcB	-0.0551335	0.110322	1	1	FALSE	584.582	601.982	546.219
sgRNA1378	SPV_1977	arcC	0.0385929	0.0951477	1	1	FALSE	524.621	491.576	501.445
sgRNA1379	SPV_1978	arcD	0.0352868	0.118953	1	1	FALSE	176.426	178.276	163.878
sgRNA1380	SPV_1979	SPV_1979	-0.00241639	0.111357	1	1	FALSE	296.835	286.01	304.807
sgRNA1381	SPV_1981	SPV_1981	0.0589385	0.110652	1	1	FALSE	230.577	225.73	228.484
sgRNA1382	SPV_1983	SPV_1983	-0.0197489	0.0940994	1	1	FALSE	481.408	480.633	453.174
sgRNA1383	SPV_2002	dltD	-0.000203387	0.135762	1	1	FALSE	262.831	241.897	255.485
sgRNA1384	SPV_2003	dltC	0.00397413	0.0854722	1	1	FALSE	473.93	483.286	433.956
sgRNA1385	SPV_2004	dltB	0.140851	0.0890687	1	1	FALSE	673.29	626.146	543.139
sgRNA1386	SPV_2005	dltA	0.0190618	0.101055	1	1	FALSE	296.387	292.631	282.581
sgRNA1387	SPV_2008,SPV_2452	SPV_2008,SPV_2452	0.0754072	0.112532	1	1	FALSE	461.204	452.248	419.684
sgRNA1388	SPV_2009	SPV_2009	0.00445353	0.123127	1	1	FALSE	253.775	258.443	244.661
sgRNA1389	SPV_2019	SPV_2019	0.215825	0.125237	1	1	FALSE	217.497	196.048	185.148
sgRNA1390	SPV_2020	SPV_2020	-0.260556	0.121203	1	1	FALSE	541.242	625.297	690.176
sgRNA1391	SPV_2021	SPV_2021	-0.405529	0.132909	1	1	FALSE	383.403	555.757	633.155
sgRNA1392	SPV_2214,SPV_2341,SPV_2342,SPV_2039,SPV_2323	SPV_2214,SPV_2341,SPV_2342,SPV_2039,SPV_2323	0.168812	0.154027	1	1	FALSE	184.569	177.866	180.234
sgRNA1393	SPV_0713,SPV_2040,SPV_2457	SPV_0713,SPV_2040,SPV_2457	0.00531406	0.111814	1	1	FALSE	349.132	329.532	348.143
sgRNA1394	SPV_2046	cbiQ	-0.938255	0.213252	1	1	FALSE	147.306	268.949	582.646
sgRNA1395	SPV_2047	cbiO2	-0.680169	0.168692	1	1	FALSE	267.345	393.968	866.429
sgRNA1396	SPV_2048	cbiO1	-0.825997	0.254286	1	1	FALSE	122.615	216.42	366.863
sgRNA1397	SPV_2058	SPV_2058	0.255128	0.106318	1	1	FALSE	306.449	256.979	223.514
sgRNA1398	SPV_2059,SPV_2460	SPV_2059,SPV_2460	0.0640181	0.107554	1	1	FALSE	365.308	350.652	340.997
sgRNA1399	SPV_2061,SPV_0020	tRNA-Asn-2,tRNA-Asn-1	-1.75607	0.170056	8.74773e-06	0.000117001	TRUE	220.37	689.181	2781.98
sgRNA1400	SPV_2073,SPV_2075	SPV_2073,SPV_2075	-0.0243759	0.101123	1	1	FALSE	345.998	336.759	368.438
sgRNA1401	SPV_2076	SPV_2076	-0.0260475	0.117166	1	1	FALSE	310.172	311.662	323.959
sgRNA1402	SPV_2084	srf-02	0.0354445	0.0811377	1	1	FALSE	982.181	949.164	937.389
sgRNA1403	SPV_2085,SPV_0758,SPV_2236,SPV_1708,SPV_2403,SPV_2404	SPV_2085,SPV_0758,SPV_2236,SPV_1708,SPV_2403,SPV_2404	-0.146106	0.136847	1	1	FALSE	132.081	157.755	117.556
sgRNA1404	SPV_2087	SPV_2087	0.10118	0.105015	1	1	FALSE	433.416	410.198	391.452
sgRNA1405	SPV_2088	SPV_2088	0.294504	0.105137	1	1	FALSE	343.551	261.594	309.021
sgRNA1406	SPV_2089	SPV_2089	0.0321474	0.0988821	1	1	FALSE	532.843	510.582	466.874
sgRNA1407	SPV_2090	SPV_2090	-0.0152313	0.115817	1	1	FALSE	264.457	245.059	232.386
sgRNA1408	SPV_2091	SPV_2091	-0.00700217	0.0906937	1	1	FALSE	480.778	488.655	459.843
sgRNA1409	SPV_2096,SPV_0105	SPV_2096,SPV_0105	0.0652669	0.103473	1	1	FALSE	553.689	526.049	498.102
sgRNA1410	SPV_2100	SPV_2100	0.16793	0.143894	1	1	FALSE	227.078	187.346	206.464
sgRNA1411	SPV_2104,SPV_0125	SPV_2104,SPV_0125	0.165491	0.0836248	1	1	FALSE	654.537	569.961	579.69
sgRNA1412	SPV_2110,SPV_2112	SPV_2110,SPV_2112	0.094819	0.127644	1	1	FALSE	291.398	268.584	277.576
sgRNA1413	SPV_2113,SPV_2114	SPV_2113,SPV_2114	0.0232605	0.0964625	1	1	FALSE	508.483	501.48	410.267
sgRNA1414	SPV_2115,SPV_2116	SPV_2115,SPV_2116	-0.0739411	0.114714	1	1	FALSE	377.993	393.893	361.939
sgRNA1415	SPV_2116,SPV_2223,SPV_0716	SPV_2116,SPV_2223,SPV_0716	0.4397	0.0992278	1	1	FALSE	394.228	294.988	253.599
sgRNA1416	SPV_2117,SPV_2118	SPV_2117,SPV_2118	0.211445	0.160568	1	1	FALSE	182.627	162.846	163.863
sgRNA1417	SPV_2126,SPV_0224	SPV_2126,SPV_0224	0.0817433	0.12445	1	1	FALSE	287.691	286.01	267.546
sgRNA1418	SPV_2127,SPV_2128	SPV_2127,SPV_2128	-0.077301	0.128561	1	1	FALSE	276.121	279.052	256.066
sgRNA1419	SPV_2130,SPV_2129	ccnB,ccnA	0.33895	0.155548	1	1	FALSE	167.53	128.489	141.273
sgRNA1420	SPV_2133	ccnD	0.425441	0.113824	1	1	FALSE	383.85	262.782	278.76
sgRNA1421	SPV_2143,SPV_2223,SPV_2224,SPV_2135,SPV_2136	SPV_2143,SPV_2223,SPV_2224,SPV_2135,SPV_2136	0.29664	0.117277	1	1	FALSE	420.351	349.269	252.49
sgRNA1422	SPV_2137,SPV_2138	SPV_2137,SPV_2138	0.145651	0.13405	1	1	FALSE	359.403	341.502	353.23
sgRNA1423	SPV_2137,SPV_2139	SPV_2137,srf-08	0.0359575	0.12382	1	1	FALSE	221.554	217.113	219.779
sgRNA1424	SPV_2141	SPV_2141	0.133074	0.121301	1	1	FALSE	251.865	224.649	209.31
sgRNA1425	SPV_2142	SPV_2142	0.0555305	0.0969116	1	1	FALSE	421.439	409.508	371.69
sgRNA1426	SPV_2144	SPV_2144	-0.0245844	0.0986431	1	1	FALSE	346.063	368.094	342.096
sgRNA1427	SPV_2146,SPV_2147	SPV_2146,SPV_2147	0.0459541	0.109164	1	1	FALSE	437.798	399.042	351.014
sgRNA1428	SPV_2158	SPV_2158	0.283594	0.132468	1	1	FALSE	356.784	286.822	283.984
sgRNA1429	SPV_2160,SPV_2162	SPV_2160,SPV_2162	-0.00740768	0.103075	1	1	FALSE	419.634	428.459	419.557
sgRNA1430	SPV_2164	SPV_2164	0.106631	0.106761	1	1	FALSE	280.631	256.979	282.602
sgRNA1431	SPV_2165	SPV_2165	0.131233	0.102115	1	1	FALSE	343.064	310.379	317.257
sgRNA1432	SPV_2166	SPV_2166	-0.339724	0.210024	1	1	FALSE	56.2657	68.7747	63.837
sgRNA1433	SPV_2168	SPV_2168	0.0862894	0.10478	1	1	FALSE	631.309	586.907	565.486
sgRNA1434	SPV_2169	SPV_2169	-0.00390011	0.120948	1	1	FALSE	218.83	237.084	247.089
sgRNA1435	SPV_2188,SPV_0518	SPV_2188,SPV_0518	0.290755	0.148454	1	1	FALSE	229.131	195.659	194.871
sgRNA1436	SPV_2008,SPV_2451,SPV_2189,SPV_0520	SPV_2008,SPV_2451,SPV_2189,SPV_0520	-0.0141061	0.106606	1	1	FALSE	374.098	380.92	367.87
sgRNA1437	SPV_2192,SPV_0544	SPV_2192,SPV_0544	0.00812983	0.0912154	1	1	FALSE	698.377	693.864	689.78
sgRNA1438	SPV_2200	srf-11	0.0278946	0.123769	1	1	FALSE	248.54	246.886	250.383
sgRNA1439	SPV_2201,SPV_0565	SPV_2201,SPV_0565	0.111869	0.139139	1	1	FALSE	192.222	174.704	167.77
sgRNA1440	SPV_2202	SPV_2202	-0.0169776	0.0858125	1	1	FALSE	511.595	503.181	457.998
sgRNA1441	SPV_2203,SPV_2204	SPV_2203,SPV_2204	0.129733	0.12052	1	1	FALSE	346.277	305.929	267.414
sgRNA1442	SPV_2205,SPV_2206	SPV_2205,SPV_2206	0.205954	0.129572	1	1	FALSE	197.042	170.194	189.131
sgRNA1443	SPV_2213	SPV_2213	-1.20628	0.149656	0.168094	1	FALSE	324.038	791.087	1798.99
sgRNA1444	SPV_2219	SPV_2219	0.0229299	0.0874582	1	1	FALSE	455.922	450.178	510.736
sgRNA1445	SPV_2226	srf-12	-0.0162972	0.110611	1	1	FALSE	558.567	572.021	514.576
sgRNA1446	SPV_2227,SPV_0727	SPV_2227,SPV_0727	0.0874952	0.123113	1	1	FALSE	250.404	227.136	227.386
sgRNA1447	SPV_2239	SPV_2239	-0.617134	0.115035	1	1	FALSE	324.682	524.111	669.69
sgRNA1448	SPV_2240,SPV_0791	SPV_2240,SPV_0791	-0.00436198	0.110025	1	1	FALSE	520.725	536.34	476.205
sgRNA1449	SPV_2242,SPV_0800	SPV_2242,SPV_0800	0.0810295	0.0985735	1	1	FALSE	430.259	399.9	352.273
sgRNA1450	SPV_2244	SPV_2244	-0.12828	0.0927255	1	1	FALSE	608.734	697.712	654.039
sgRNA1451	SPV_2250	SPV_2250	-0.908436	0.194411	1	1	FALSE	200.708	433.505	583.21
sgRNA1452	SPV_2259	rpmG1	-0.0671228	0.107449	1	1	FALSE	298.28	309.921	298.851
sgRNA1453	SPV_2178,SPV_0497,SPV_2260,SPV_0869,SPV_2341,SPV_2343,SPV_2344,SPV_1420,SPV_2358,SPV_0744,SPV_2232	SPV_2178,SPV_0497,SPV_2260,SPV_0869,SPV_2341,SPV_2343,SPV_2344,SPV_1420,SPV_2358,SPV_0744,SPV_2232	0.102104	0.127333	1	1	FALSE	318.787	299.256	301.078
sgRNA1454	SPV_2266,SPV_1036	dhaM,SPV_1036	0.0265875	0.0891207	1	1	FALSE	627.227	643.276	564.808
sgRNA1455	SPV_2267	SPV_2267	0.117515	0.103441	1	1	FALSE	397.664	378.837	336.24
sgRNA1456	SPV_2278	SPV_2278	0.0576717	0.0955681	1	1	FALSE	343.08	360.399	330.372
sgRNA1457	SPV_2279,SPV_2281	SPV_2279,SPV_2281	9.70799e-05	0.103723	1	1	FALSE	303.984	295.213	310.978
sgRNA1458	SPV_2282	shp	-0.000329203	0.101556	1	1	FALSE	329.091	323.579	305.21
sgRNA1459	SPV_2283,SPV_0936	SPV_2283,SPV_0936	0.0475205	0.104981	1	1	FALSE	385.622	393.745	365.042
sgRNA1460	SPV_2289	SPV_2289	0.051532	0.0939849	1	1	FALSE	335.036	316.206	304.868
sgRNA1461	SPV_2290	SPV_2290	-0.114267	0.146364	1	1	FALSE	261.346	283.004	236.323
sgRNA1462	SPV_2291	srf-16	-0.174776	0.166501	1	1	FALSE	148.159	166.482	170.011
sgRNA1463	SPV_2293,SPV_2296	phtF,SPV_2296	0.114018	0.100495	1	1	FALSE	495.786	436.07	470.336
sgRNA1464	SPV_2298	SPV_2298	0.221945	0.0997072	1	1	FALSE	516.246	448.895	453.165
sgRNA1465	SPV_2299,SPV_1045	SPV_2299,SPV_1045	0.203034	0.0985436	1	1	FALSE	460.018	387.333	420.021
sgRNA1466	SPV_2311	SPV_2311	0.153835	0.121809	1	1	FALSE	332.898	297.233	337.858
sgRNA1467	SPV_2314	SPV_2314	-0.543502	0.114737	1	1	FALSE	501.727	802.375	1019.41
sgRNA1468	SPV_2319,SPV_1161	SPV_2319,SPV_1161	0.0456625	0.117017	1	1	FALSE	398.765	404.535	369.919
sgRNA1469	SPV_2320,SPV_2321,SPV_2375,SPV_2376	SPV_2320,SPV_2321,SPV_2375,SPV_2376	0.0499233	0.109336	1	1	FALSE	554.996	560.478	484.699
sgRNA1470	SPV_2325	SPV_2325	0.00390786	0.102607	1	1	FALSE	359.697	347.573	350.311
sgRNA1471	SPV_2332	SPV_2332	-0.135746	0.113934	1	1	FALSE	278.581	301.516	356.958
sgRNA1472	SPV_2333	SPV_2333	-0.283625	0.100575	1	1	FALSE	596.362	718.578	850.556
sgRNA1473	SPV_2337,SPV_1271	SPV_2337,SPV_1271	0.170065	0.094734	1	1	FALSE	552.574	483.795	420.898
sgRNA1474	SPV_2349	SPV_2349	0.0472141	0.0723221	1	1	FALSE	691.568	651.384	645.421
sgRNA1475	SPV_2351,SPV_2353	msbA,SPV_2353	-0.0738887	0.110288	1	1	FALSE	436.76	450.178	376.764
sgRNA1476	SPV_2362	SPV_2362	0.0490551	0.106962	1	1	FALSE	442.967	426.536	427.598
sgRNA1477	SPV_2363	SPV_2363	0.0837055	0.109717	1	1	FALSE	608.433	600.999	489.464
sgRNA1478	SPV_2367	SPV_2367	0.150078	0.0925091	1	1	FALSE	481.133	453.851	462.294
sgRNA1479	SPV_2371,SPV_1455	SPV_2371,SPV_1455	0.0607026	0.0927394	1	1	FALSE	774.646	698.024	720.633
sgRNA1480	SPV_2372	SPV_2372	0.00920953	0.100134	1	1	FALSE	476.185	469.411	419.148
sgRNA1481	SPV_2373,SPV_1471	SPV_2373,SPV_1471	0.086687	0.089915	1	1	FALSE	553.28	506.38	488.809
sgRNA1482	SPV_2377	SPV_2377	0.0854803	0.10444	1	1	FALSE	398.542	364.744	334.753
sgRNA1483	SPV_2381	SPV_2381	0.119003	0.112278	1	1	FALSE	235.188	230.077	199.721
sgRNA1484	SPV_2384	SPV_2384	0.22567	0.121751	1	1	FALSE	625.488	514.035	436.932
sgRNA1485	SPV_2389	SPV_2389	0.0609784	0.110445	1	1	FALSE	397.683	397.074	381.461
sgRNA1486	SPV_2395	SPV_2395	-0.035533	0.101252	1	1	FALSE	373.433	378.837	396.959
sgRNA1487	SPV_2407	SPV_2407	0.0799618	0.100881	1	1	FALSE	572.116	546.645	586.905
sgRNA1488	SPV_2408,SPV_2410	SPV_2408,SPV_2410	0.0590558	0.0923384	1	1	FALSE	549.25	532.056	517.092
sgRNA1489	SPV_2411,SPV_2412	SPV_2411,SPV_2412	0.268298	0.11042	1	1	FALSE	296.829	252.174	249.712
sgRNA1490	SPV_2274,SPV_0972,SPV_2304,SPV_2305,SPV_1539,SPV_2386,SPV_2414,SPV_2415,SPV_2083,SPV_0045	SPV_2274,SPV_0972,SPV_2304,SPV_2305,SPV_1539,SPV_2386,SPV_2414,SPV_2415,SPV_2083,SPV_0045	0.0441194	0.0848225	1	1	FALSE	848.18	785.029	732.259
sgRNA1491	SPV_2416,SPV_1734	SPV_2416,SPV_1734	0.13499	0.117092	1	1	FALSE	495.906	478.312	477.094
sgRNA1492	SPV_2417	SPV_2417	0.0433002	0.141824	1	1	FALSE	199.846	198.122	181.073
sgRNA1493	SPV_2418	SPV_2418	0.123612	0.132101	1	1	FALSE	252.368	222.162	249.838
sgRNA1494	SPV_2419	SPV_2419	0.221159	0.168508	1	1	FALSE	121.574	110.311	100.68
sgRNA1495	SPV_2434	SPV_2434	0.0524381	0.105736	1	1	FALSE	399.256	362.142	355.938
sgRNA1496	SPV_2437	SPV_2437	0.0141624	0.137843	1	1	FALSE	167.421	169.961	176.504
sgRNA1497	SPV_2446,SPV_1982	SPV_2446,SPV_1982	-0.0042031	0.123274	1	1	FALSE	303.134	298.814	285.407
sgRNA1498	SPV_2453	SPV_2453	-0.28413	0.131378	1	1	FALSE	205.855	255.73	293.64
sgRNA1499	SPV_2455	SPV_2455	0.103843	0.149703	1	1	FALSE	171.98	157.755	150.575

## Sheet: Max_vs_Middle_significant
sgRNA	target_operon_locus_tags	target_operon_names	log2FoldChange	lfcSE	pvalue	padj	significant	normcts_median_FSCMax	normcts_median_FSCMiddle	normcts_median_FSCMin
sgRNA0565	SPV_1479,SPV_1480	ftsZ,ftsA	3.30162	0.381956	1.68188e-09	3.87609e-08	TRUE	68.8532	8.28964	6.00157
sgRNA0785	SPV_0600	divIB	2.8802	0.543389	0.000539899	0.00550182	TRUE	38.6288	6.41279	9.74121
sgRNA0372	SPV_0953,SPV_0952	ppc,ftsW	2.85653	0.330936	2.02402e-08	4.1534e-07	TRUE	195.985	24.3686	32.2395
sgRNA0495	SPV_1327	bta	2.81818	0.173145	8.55366e-26	1.60167e-23	TRUE	1061.36	153.358	189.949
sgRNA0899	SPV_0149	azlC	2.79291	0.155126	6.74407e-31	3.36754e-28	TRUE	669.78	96.9888	69.1366
sgRNA0003	SPV_0007,SPV_0008	SPV_0007,divIC	2.67833	0.334969	5.43131e-07	8.94077e-06	TRUE	67.3643	8.40464	20.5312
sgRNA0481	SPV_1288	SPV_1288	2.36814	0.254076	7.25399e-08	1.39314e-06	TRUE	167.68	30.6717	39.4092
sgRNA0201	SPV_0533	rnjB	2.231	0.184546	2.55033e-11	7.64079e-10	TRUE	375.566	81.423	57.8126
sgRNA0632	SPV_1706	SPV_1706	1.96467	0.205293	2.61422e-06	3.76548e-05	TRUE	317.445	72.9432	69.7208
sgRNA0774	SPV_0130	rnjA	1.95688	0.262944	0.000273578	0.00292729	TRUE	246.355	65.4882	54.7847
sgRNA0987	SPV_0602	SPV_0602	1.94562	0.20974	6.52739e-06	9.05373e-05	TRUE	575.338	141.502	97.2691
sgRNA0046	SPV_0131	SPV_0131	1.94447	0.18172	2.02122e-07	3.48537e-06	TRUE	607.791	150.059	81.9581
sgRNA0510	SPV_1364,SPV_1365,SPV_1366,SPV_1367	SPV_1364,SPV_1365,SPV_1366,SPV_1367	1.8725	0.183856	2.07896e-06	3.14575e-05	TRUE	433.413	121.843	110.932
sgRNA0332	SPV_0871,SPV_0872	ebsC,SPV_0872	1.74086	0.158128	2.79685e-06	3.99017e-05	TRUE	448.615	141.753	120.132
sgRNA0986	SPV_0601	SPV_0601	1.62842	0.152347	3.70821e-05	0.000451617	TRUE	462.793	143.647	108.794
sgRNA0931	SPV_0341	rlmL	-1.31158	0.0857835	0.000281112	0.00298657	TRUE	251.704	629.886	1567.04
sgRNA0021	SPV_0064	cpsR	-1.41144	0.128935	0.00141745	0.0134388	TRUE	97.6329	262.596	355.908
sgRNA0254	SPV_2220,SPV_0676	SPV_2220,SPV_0676	-1.42202	0.150815	0.00513732	0.0463597	TRUE	153.572	419.763	968.381
sgRNA0169	SPV_0443	nptA	-1.43525	0.139904	0.00186387	0.0173421	TRUE	168.423	485.716	873.96
sgRNA0543	SPV_1435	SPV_1435	-1.48089	0.16281	0.0031397	0.0288544	TRUE	77.5153	237.273	369.001
sgRNA1055	SPV_0836	SPV_0836	-1.48863	0.129772	0.000166368	0.00185985	TRUE	247.441	677.624	1157.76
sgRNA0416	SPV_1087	fhs	-1.49941	0.139539	0.000344865	0.00361264	TRUE	121.575	351.944	471.574
sgRNA0049	SPV_0134	SPV_0134	-1.53411	0.192016	0.00540926	0.0485214	TRUE	230.729	662.916	2117.67
sgRNA0699	SPV_1879	tRNA-Leu-6	-1.55184	0.148844	0.000209305	0.0022886	TRUE	184.247	539.998	2286.67
sgRNA0315	SPV_0825	tmk	-1.55565	0.158804	0.000467057	0.00485869	TRUE	44.2121	143.647	268.786
sgRNA1070	SPV_0905	bltD	-1.56063	0.16052	0.000478307	0.0049414	TRUE	134.883	355.096	1037.79
sgRNA0499	SPV_1334,SPV_1335,SPV_1336,SPV_1337,SPV_1338,SPV_1339,SPV_1340,SPV_1341	atpC,atpD,atpG,atpA,atpH,atpF,atpB,atpE	-1.60175	0.164687	0.000258305	0.00278374	TRUE	82.3385	239.838	459.016
sgRNA0183	SPV_0476,SPV_0477	SPV_0476,trmB	-1.60194	0.138813	1.44891e-05	0.00018711	TRUE	54.8674	177.638	327.224
sgRNA0582	SPV_1534,SPV_1535	scrB,scrR	-1.60232	0.16057	0.000176035	0.00195334	TRUE	161.577	513.734	942.081
sgRNA0538	SPV_1422,SPV_1423,SPV_1424	pdxU2,pdxK,truA	-1.60909	0.180541	0.000741678	0.00730944	TRUE	75.3193	233.768	261.239
sgRNA0184	SPV_0478,SPV_0479,SPV_0480,SPV_0481,SPV_0482,SPV_0483	rimP,nusA,SPV_0480,SPV_0481,infB,rbfA	-1.61491	0.179561	0.000615831	0.0061501	TRUE	104.79	304.668	661.203
sgRNA0020	SPV_0061,SPV_0062	SPV_0061,purB	-1.63868	0.137983	3.67917e-06	5.19943e-05	TRUE	122.105	377.158	699.774
sgRNA0246	SPV_0663	yqfR	-1.66083	0.161596	4.32538e-05	0.000518353	TRUE	54.839	160.474	334.653
sgRNA1302	SPV_0552,SPV_2196,SPV_1674,SPV_1942,SPV_1949,SPV_1939,SPV_0690	SPV_0552,SPV_2196,SPV_1674,SPV_1942,SPV_1949,SPV_1939,SPV_0690	-1.66551	0.162393	4.16522e-05	0.000503185	TRUE	183.014	621.943	2043.97
sgRNA0282	SPV_0745	plsY	-1.66821	0.194637	0.000596726	0.00599929	TRUE	231.311	709.142	1423.77
sgRNA0511	SPV_1368,SPV_1369	rpsR,ssbA	-1.66982	0.156135	1.78696e-05	0.000228792	TRUE	66.207	295.213	519.333
sgRNA0831	SPV_1546	priA	-1.67149	0.204723	0.00103799	0.0100317	TRUE	77.0956	251.384	346.587
sgRNA0009	SPV_0026	scRNA	-1.6718	0.127041	1.23615e-07	2.31468e-06	TRUE	147.487	483.267	651.944
sgRNA0540	SPV_1430	fer	-1.68786	0.201394	0.000636614	0.00631554	TRUE	166.747	504.01	686.123
sgRNA0590	SPV_1555,SPV_1556,SPV_1557,SPV_1558,SPV_1559,SPV_1560,SPV_1561	SPV_1555,yqeK,nadD,SPV_1558,yqeH,SPV_1560,corA2	-1.68834	0.170297	5.29999e-05	0.00063011	TRUE	64.0613	208.015	348.564
sgRNA0823	SPV_2374,SPV_1474	SPV_2374,divIVA	-1.68891	0.22101	0.00182656	0.0171012	TRUE	35.1273	98.0238	656.294
sgRNA0268	SPV_0705	yoaA	-1.69055	0.191314	0.000306774	0.00323625	TRUE	74.5823	264.746	686.648
sgRNA0545	SPV_1437	plsC	-1.69079	0.234423	0.00321111	0.0293308	TRUE	116.707	467.508	969.454
sgRNA1264	SPV_1520	frp	-1.69285	0.186199	0.000198445	0.00218582	TRUE	31.1979	97.8178	247.517
sgRNA0244	SPV_2217	SPV_2217	-1.69969	0.167145	2.83761e-05	0.0003513	TRUE	115.244	381.361	942.996
sgRNA0133	SPV_0340	rnpB	-1.70133	0.213204	0.0010038	0.00976421	TRUE	105.439	426.536	1064.6
sgRNA0524	SPV_1401	folA	-1.70465	0.218051	0.00123111	0.0117465	TRUE	22.2341	76.9535	130.187
sgRNA0150	SPV_0393,SPV_0394,SPV_0395	nusB,SPV_0394,efp	-1.70727	0.115054	7.88438e-10	1.90497e-08	TRUE	107.129	348.994	678.431
sgRNA0410	SPV_1078	ldh	-1.72172	0.174176	3.41873e-05	0.000419776	TRUE	147.8	587.412	1217.97
sgRNA0323	SPV_2258	srf-14	-1.7273	0.254461	0.00426044	0.0386796	TRUE	19.6138	71.4394	282.261
sgRNA0775	SPV_0136	tsaD	-1.74597	0.170007	1.14482e-05	0.000151764	TRUE	135.043	526.341	1344.89
sgRNA0364	SPV_0980	prs2	-1.74627	0.170428	1.19332e-05	0.000156807	TRUE	140.168	453.851	1371.48
sgRNA1399	SPV_2061,SPV_0020	tRNA-Asn-2,tRNA-Asn-1	-1.75607	0.170056	8.74773e-06	0.000117001	TRUE	220.37	689.181	2781.98
sgRNA0866	SPV_1702,SPV_1816,SPV_1893,SPV_0016	rrsB,rrsC,rrsD,rrsA	-1.8127	0.171971	2.29217e-06	3.43368e-05	TRUE	68.4616	254.24	461.08
sgRNA0765	SPV_2066	tRNA-Arg-5	-1.81589	0.173576	2.59569e-06	3.76548e-05	TRUE	81.0191	269.413	254.732
sgRNA0568	SPV_1486	pbp2b	-1.8278	0.1952	2.22728e-05	0.000280376	TRUE	75.4295	290.966	637.877
sgRNA0521	SPV_1385,SPV_1386,SPV_1387,SPV_1388,SPV_1389	SPV_1385,cca,dapB,SPV_1388,SPV_1389	-1.84621	0.174151	1.17944e-06	1.89979e-05	TRUE	113.376	434.94	1013.11
sgRNA0081	SPV_0201,SPV_0202,SPV_0203,SPV_0204,SPV_0205,SPV_0206,SPV_0207,SPV_0208,SPV_0209,SPV_0210,SPV_0211,SPV_0212,SPV_0213	rpmC,rpsQ,rplN,rplX,rplE,rpsN,rpsH,rplF,rplR,rpsE,rpmD,rplO,secY	-1.87309	0.251299	0.00051217	0.005255	TRUE	40.4211	151.284	601.714
sgRNA0431	SPV_1123,SPV_1124,SPV_1125,SPV_1126,SPV_1127	licC,licB,licA,tarJ,tarI	-1.88685	0.228974	0.000107445	0.00122865	TRUE	45.2456	174.083	161.034
sgRNA0139	SPV_0367,SPV_0368	lepB,rnhC	-1.89865	0.180954	6.82966e-07	1.11205e-05	TRUE	88.9015	350.894	758.785
sgRNA0369	SPV_0963	SPV_0963	-1.92956	0.134441	4.70275e-12	1.56549e-10	TRUE	54.3088	223.82	434.209
sgRNA0788	SPV_0706	rodA	-1.93018	0.206608	6.7275e-06	9.24569e-05	TRUE	50.1725	174.911	455.323
sgRNA0209	SPV_0550,SPV_0551	rplK,rplA	-1.94286	0.18142	2.02421e-07	3.48537e-06	TRUE	52.0423	179.056	463.56
sgRNA0447	SPV_1154	rpmE2	-1.94299	0.211389	8.16073e-06	0.000111134	TRUE	57.4572	263.696	1349.24
sgRNA0841	SPV_2041	tsf	-1.94797	0.154639	8.77591e-10	2.08672e-08	TRUE	53.7291	202.762	886.381
sgRNA0147	SPV_0379,SPV_0380,SPV_0381	fabT,fabH,acpP	-1.98471	0.250753	8.60089e-05	0.00099877	TRUE	16.0184	69.5106	117.202
sgRNA0822	SPV_1472	ileS	-2.00488	0.317326	0.00154179	0.0145258	TRUE	10.5143	48.3267	471.657
sgRNA1121	SPV_1062	recN	-2.00524	0.170412	3.65988e-09	7.83214e-08	TRUE	67.3449	235.33	872.003
sgRNA0527	SPV_1405,SPV_1406	dnaD,metA	-2.00643	0.252256	6.61556e-05	0.000780324	TRUE	31.3917	135.951	285.841
sgRNA0541	SPV_1429	SPV_1429	-2.03317	0.262211	8.14079e-05	0.000952727	TRUE	20.9612	75.4358	183.852
sgRNA0705	SPV_1904	argR1	-2.05042	0.168567	4.62156e-10	1.15313e-08	TRUE	81.7488	379.259	2564.58
sgRNA0829	SPV_1521	dnaI	-2.06088	0.174266	1.14552e-09	2.68122e-08	TRUE	41.6039	159.99	424.279
sgRNA0810	SPV_0991	rpmA	-2.07377	0.21218	4.1784e-07	7.03285e-06	TRUE	60.7469	294.162	979.596
sgRNA0751	SPV_2031,SPV_2032	rplI,pde1	-2.08625	0.259391	2.81808e-05	0.0003513	TRUE	18.4573	85.097	250.08
sgRNA1132	SPV_1103	SPV_1103	-2.10322	0.136318	5.82234e-16	2.81351e-14	TRUE	64.4923	338.217	479.358
sgRNA0492	SPV_1318	tuf	-2.11255	0.235782	2.37544e-06	3.48864e-05	TRUE	43.2807	171.245	1381.76
sgRNA0222	SPV_0583,SPV_0584,SPV_0585,SPV_0586,SPV_0587	miaA,hflX,SPV_0585,rnz,SPV_0587	-2.11732	0.131727	2.21097e-17	1.32481e-15	TRUE	155.517	668.169	1782.32
sgRNA0771	SPV_0013	ftsH	-2.11782	0.402485	0.00548146	0.0488764	TRUE	31.2515	121.739	381.939
sgRNA1360	SPV_1922	hipO	-2.13697	0.190602	2.44395e-09	5.46424e-08	TRUE	76.194	264.746	1640.22
sgRNA1131	SPV_1102	SPV_1102	-2.14702	0.193298	2.95681e-09	6.51367e-08	TRUE	71.5855	268.603	393.418
sgRNA1340	SPV_1883,SPV_0755	tRNA-Tyr-2,tRNA-Tyr-1	-2.15313	0.334091	0.000557405	0.00564184	TRUE	29.0034	133.386	1692.11
sgRNA1257	SPV_1510	aroF	-2.18598	0.309596	0.000127766	0.00144995	TRUE	15.4311	67.9751	110.095
sgRNA0044	SPV_0127,SPV_2107,SPV_0128,SPV_0129	mnmA,srf-04,SPV_0128,mnmG	-2.19017	0.191071	4.69564e-10	1.15313e-08	TRUE	23.1062	117.665	540.087
sgRNA0701	SPV_1896	gltX	-2.19357	0.324423	0.000234104	0.00254121	TRUE	39.0461	175.494	2238.07
sgRNA0760	SPV_2055	guaB	-2.1952	0.305202	8.99897e-05	0.00103696	TRUE	145.835	605.134	1776.45
sgRNA0658	SPV_1773	yidC1	-2.21119	0.182731	3.39663e-11	9.7849e-10	TRUE	124.438	631.019	1143.99
sgRNA0757	SPV_2043	pcsB	-2.24073	0.373329	0.000889236	0.00870638	TRUE	5.34652	35.7197	104.914
sgRNA0737	SPV_2447,SPV_2449	srf-27,srf-28	-2.24361	0.238293	1.80082e-07	3.17369e-06	TRUE	33.9044	147.494	848.659
sgRNA0740	SPV_1997,SPV_1998,SPV_1999,SPV_2000	adcA,adcB,adcC,adcR	-2.25448	0.131952	1.96141e-21	1.83637e-19	TRUE	132.812	665.017	2996.85
sgRNA0814	SPV_1142	ffh	-2.25923	0.166323	3.70298e-14	1.54085e-12	TRUE	37.4785	187.352	468.181
sgRNA0776	SPV_0214	adk	-2.28761	0.284673	6.09308e-06	8.53031e-05	TRUE	12.3374	51.4784	312.799
sgRNA0171	SPV_0445	pgk	-2.30932	0.210199	4.69503e-10	1.15313e-08	TRUE	129.804	604.084	2265.47
sgRNA0719	SPV_1940,SPV_1941	SPV_1940,aspS	-2.31367	0.278301	2.35476e-06	3.48864e-05	TRUE	9.35684	66.1865	476.147
sgRNA1219	SPV_1372	SPV_1372	-2.31887	0.403623	0.0010847	0.0104159	TRUE	8.7853	32.568	558.037
sgRNA0318	SPV_0834	pyrH	-2.32414	0.239313	3.14663e-08	6.20217e-07	TRUE	15.7883	74.6595	92.0186
sgRNA1343	SPV_1682,SPV_1683,SPV_1684,SPV_1685,SPV_1686,SPV_1687,SPV_1886	tRNA-Ser-2,tRNA-Ile-1,tRNA-Gly-1,tRNA-Phe-1,tRNA-fMet-1,tRNA-Ser-3,tRNA-Ser-4	-2.33669	0.20809	1.33062e-10	3.55941e-09	TRUE	42.3139	236.381	867.257
sgRNA0674	SPV_1821	pbp2a	-2.35577	0.197805	7.17777e-12	2.28772e-10	TRUE	108.124	592.527	1568.71
sgRNA0864	SPV_1682,SPV_1683,SPV_1684,SPV_1685,SPV_1686,SPV_1687,SPV_1688,SPV_1689,SPV_1690,SPV_1691,SPV_1692,SPV_1693,SPV_1694,SPV_1695,SPV_1804,SPV_1805,SPV_1806,SPV_1807,SPV_1808,SPV_1809	tRNA-Ser-2,tRNA-Ile-1,tRNA-Gly-1,tRNA-Phe-1,tRNA-fMet-1,tRNA-Ser-3,tRNA-Ile2-1,tRNA-Met-1,tRNA-Pro-1,tRNA-Arg-3,tRNA-Leu-2,tRNA-Gly-2,tRNA-Thr-2,tRNA-Leu-3,tRNA-Pro-2,tRNA-Arg-4,tRNA-Leu-4,tRNA-Gly-3,tRNA-Thr-3,tRNA-Leu-5	-2.36123	0.232285	4.62407e-09	9.75614e-08	TRUE	26.1211	134.474	776.493
sgRNA0513	SPV_1371	asnC	-2.38981	0.248299	2.17703e-08	4.40702e-07	TRUE	24.9921	134.474	1387.01
sgRNA0650	SPV_1760	tRNA-Cys-1	-2.39842	0.23673	3.4791e-09	7.55318e-08	TRUE	28.4593	189.104	1064.02
sgRNA0818	SPV_1373	aspC	-2.40397	0.323208	1.40007e-05	0.000182375	TRUE	24.6968	115.564	1279.65
sgRNA0796	SPV_0847	infC	-2.41777	0.292844	1.28946e-06	2.05491e-05	TRUE	14.3806	90.3499	498.664
sgRNA0111	SPV_0274,SPV_0275	rplM,rpsI	-2.42992	0.272684	1.57238e-07	2.83787e-06	TRUE	31.7805	168.093	572.283
sgRNA0862	SPV_1699,SPV_1813,SPV_1890,SPV_0019	rrfB,rrfC,rrfD,rrfA	-2.44272	0.271623	1.0874e-07	2.06192e-06	TRUE	21.9583	117.665	383.269
sgRNA0839	SPV_1849	eloR	-2.44773	0.137279	5.30281e-26	1.32394e-23	TRUE	64.7951	366.652	2022.55
sgRNA0487	SPV_1303,SPV_1304,SPV_1305,SPV_2339,SPV_1307	SPV_1303,glyS,glyQ,SPV_2339,SPV_1307	-2.46161	0.250685	5.52747e-09	1.15002e-07	TRUE	21.1375	114.513	868.427
sgRNA0082	SPV_0215,SPV_2122,SPV_0216,SPV_0217,SPV_0218,SPV_0219	infA,rpmJ,rpsM,rpsK,rpoA,rplQ	-2.46825	0.269176	4.90755e-08	9.54742e-07	TRUE	20.132	120.817	289.217
sgRNA0508	SPV_1363	ppaC	-2.48346	0.203538	3.13745e-13	1.14632e-11	TRUE	43.6072	248.987	2175.12
sgRNA0191	SPV_0504,SPV_0505	pheS,paiA	-2.48409	0.193864	1.92799e-14	8.25181e-13	TRUE	30.6634	178.599	978.43
sgRNA0004	SPV_0012	hpt	-2.52133	0.215342	1.60924e-12	5.60615e-11	TRUE	33.3998	185.953	785.432
sgRNA0440	SPV_1143	SPV_1143	-2.53038	0.198485	1.25519e-14	5.53024e-13	TRUE	25.3838	158.103	417.308
sgRNA0826	SPV_1508	alr	-2.53691	0.293534	1.64184e-07	2.92795e-06	TRUE	9.67438	50.0198	76.5839
sgRNA0783	SPV_0494	valS	-2.5472	0.20656	6.87106e-14	2.70864e-12	TRUE	34.6715	219.571	1895.07
sgRNA1339	SPV_1882	tRNA-Trp-1	-2.54969	0.239309	9.43888e-11	2.57081e-09	TRUE	24.634	196.458	1051.2
sgRNA0358	SPV_0994	ribF	-2.54998	0.230284	1.68822e-11	5.16114e-10	TRUE	17.5252	89.5282	295.923
sgRNA0302	SPV_0789,SPV_0790	pfkA,pyk	-2.55563	0.259382	2.00448e-09	4.54957e-08	TRUE	16.8283	104.007	897.521
sgRNA0001	SPV_0001,SPV_0002	dnaA,dnaN	-2.56195	0.192169	4.3642e-16	2.17919e-14	TRUE	20.6028	110.672	435.092
sgRNA0627	SPV_1671	amiA	-2.58216	0.186784	2.44285e-17	1.40746e-15	TRUE	48.534	301.516	1493.41
sgRNA0666	SPV_1791	SPV_1791	-2.58289	0.415769	0.000140587	0.00158345	TRUE	4.44557	26.8775	33.0658
sgRNA0460	SPV_1216,SPV_1217	alaS,SPV_1217	-2.59192	0.229885	4.36357e-12	1.4856e-10	TRUE	29.6164	173.346	1581.32
sgRNA0422	SPV_1098,SPV_1099	glnHP5,glnQ5	-2.5993	0.304671	1.52707e-07	2.82414e-06	TRUE	77.961	468.559	2535.39
sgRNA1333	SPV_1850	yidC2	-2.63137	0.155815	1.18694e-25	1.91788e-23	TRUE	126.746	693.383	3799.19
sgRNA0576	SPV_1522,SPV_1523	dnaB,nrdR	-2.6351	0.293628	2.56797e-08	5.12909e-07	TRUE	6.59101	41.0419	169.194
sgRNA0093	SPV_0243,SPV_0244,SPV_0245,SPV_0246	uppS,cdsA,eep,proS	-2.65209	0.346838	1.90462e-06	2.94136e-05	TRUE	14.8298	99.8051	839.383
sgRNA0860	SPV_1700,SPV_1814,SPV_1891,SPV_0018	rrlB,rrlC,rrlD,rrlA	-2.66158	0.206861	9.5591e-16	4.47485e-14	TRUE	56.0546	352.995	2217.33
sgRNA0259	SPV_0689	metG	-2.66613	0.250065	2.68672e-11	7.89159e-10	TRUE	10.038	61.9842	694.246
sgRNA0827	SPV_1509	acpS	-2.67411	0.390467	1.80739e-05	0.000229446	TRUE	5.87957	46.422	78.0828
sgRNA0761	SPV_2056	trpS	-2.67776	0.323997	2.23867e-07	3.81083e-06	TRUE	18.5399	115.415	1272.62
sgRNA0859	SPV_1682	tRNA-Ser-2	-2.68177	0.262127	1.40032e-10	3.68015e-09	TRUE	11.7591	67.9842	351.044
sgRNA0722	SPV_1950	hisS	-2.71321	0.261674	5.86627e-11	1.62735e-09	TRUE	11.0847	58.4981	812.656
sgRNA0685	SPV_1851	rnpA	-2.72207	0.272169	2.49606e-10	6.44673e-09	TRUE	14.3994	97.4744	742.596
sgRNA0587	SPV_1547,SPV_1548	rpoZ,gmk	-2.72486	0.254353	1.19034e-11	3.71486e-10	TRUE	18.7775	126.07	886.957
sgRNA1290	SPV_1639	sczA	-2.7415	0.234259	1.05315e-13	3.94404e-12	TRUE	12.4055	93.5016	909.745
sgRNA0232	SPV_0620	lysS	-2.77684	0.239004	1.05091e-13	3.94404e-12	TRUE	27.0133	234.279	1538.77
sgRNA1345	SPV_1895	SPV_1895	-2.7798	0.182441	1.74784e-22	2.01405e-20	TRUE	43.2144	246.886	1805.03
sgRNA1297	SPV_1667	amiF	-2.7799	0.207701	1.03922e-17	6.48645e-16	TRUE	68.2756	404.473	2298.8
sgRNA0816	SPV_1188	rplJ	-2.79978	0.375109	1.60243e-06	2.50045e-05	TRUE	11.7807	70.3687	712.077
sgRNA1299	SPV_1669	amiD	-2.8018	0.19322	1.10827e-20	8.30097e-19	TRUE	35.2048	243.735	1108.41
sgRNA0194	SPV_0512,SPV_0513,SPV_0514,SPV_0515,SPV_0516,SPV_0517	pnp,cysE,SPV_0514,cysS,mrnC,SPV_0517	-2.81765	0.211399	8.0979e-18	5.2742e-16	TRUE	47.5211	305.139	2250.34
sgRNA1342	SPV_1682,SPV_1683,SPV_1684,SPV_1685,SPV_1686,SPV_1885	tRNA-Ser-2,tRNA-Ile-1,tRNA-Gly-1,tRNA-Phe-1,tRNA-fMet-1,tRNA-fMet-2	-2.82782	0.216522	3.12707e-17	1.71804e-15	TRUE	19.9627	135.525	634.964
sgRNA1300	SPV_1670	amiC	-2.83714	0.194253	3.15482e-21	2.77995e-19	TRUE	59.9402	428.637	2107.97
sgRNA1298	SPV_1668	amiE	-2.87394	0.182998	1.3094e-24	1.78316e-22	TRUE	69.9101	586.224	2892.72
sgRNA0784	SPV_0506	pheT	-2.91093	0.204119	7.83307e-21	6.17576e-19	TRUE	22.662	126.07	1400.93
sgRNA0853	SPV_1883,SPV_0755	tRNA-Tyr-2,tRNA-Tyr-1	-2.91738	0.398451	1.49372e-06	2.35535e-05	TRUE	13.6331	101.976	1321.72
sgRNA0303	SPV_0790	pyk	-2.92579	0.222525	4.96046e-18	3.37763e-16	TRUE	25.7849	167.589	1666.85
sgRNA0144	SPV_0375	serS	-2.97068	0.241286	3.15128e-16	1.6278e-14	TRUE	17.4529	125.019	1051.99
sgRNA0526	SPV_1403,SPV_1404	lytC,tpiA	-3.02954	0.185065	5.52865e-28	1.65638e-25	TRUE	43.3152	397.119	1820.54
sgRNA0432	SPV_1128	tacF	-3.03774	0.457652	8.48339e-06	0.000114488	TRUE	19.0035	173.346	190.51
sgRNA0535	SPV_1416,SPV_1417	murT,gatD	-3.03918	0.296562	6.15265e-12	2.00363e-10	TRUE	11.3202	101.906	126.442
sgRNA0514	SPV_1374	SPV_1374	-3.04813	0.312468	5.5755e-11	1.57587e-09	TRUE	6.44959	72.49	664.256
sgRNA0966	SPV_0493	SPV_0493	-3.09939	0.277859	4.16925e-14	1.68798e-12	TRUE	12.2221	126.07	948.93
sgRNA0835	SPV_1759	rpoB	-3.1075	0.224647	6.5106e-21	5.41827e-19	TRUE	26.0821	262.645	1298.26
sgRNA0564	SPV_1468	gpmA	-3.11673	0.188149	2.30745e-29	8.64141e-27	TRUE	42.5098	312.022	2288.02
sgRNA1058	SPV_0849	rplT	-3.19309	0.284035	1.15244e-14	5.23137e-13	TRUE	11.6201	113.834	532.778
sgRNA0130	SPV_0336,SPV_0337	pbp1a,recU	-3.20714	0.210951	1.28029e-25	1.91788e-23	TRUE	16.7462	184.688	757.043
sgRNA0167	SPV_0441	rpoE	-3.21883	0.23855	1.38729e-20	9.89598e-19	TRUE	33.9875	344.664	1856.08
sgRNA0505	SPV_1358	ytgP	-3.26645	0.268581	3.2113e-17	1.71804e-15	TRUE	34.3504	358.248	459.94
sgRNA0834	SPV_1758	rpoC	-3.29511	0.241325	1.89837e-21	1.83637e-19	TRUE	15.8898	152.624	791.646
sgRNA0395	SPV_1039,SPV_1040	ptsI,ptsH	-3.33219	0.491064	2.04165e-06	3.1208e-05	TRUE	8.20757	72.085	1143.93
sgRNA0197	SPV_0526	fba	-3.39375	0.227341	6.3295e-26	1.35451e-23	TRUE	38.6647	492.722	3060.5
sgRNA0347	SPV_1012	eno	-3.42567	0.237335	1.6062e-24	2.00507e-22	TRUE	17.1302	140.778	1686.12
sgRNA0286	SPV_0757	rpsA	-3.46298	0.174714	3.95047e-45	5.9178e-42	TRUE	124.392	1348.94	9795.95
sgRNA0676	SPV_1823	gap	-3.52269	0.189832	2.67823e-40	2.00599e-37	TRUE	27.015	308.871	2384.63
sgRNA0567	SPV_1484	ddl	-3.54741	0.827919	0.00209177	0.0193424	TRUE	0.387369	9.45522	27.8532
sgRNA0012	SPV_0033	prs1	-3.57349	0.361857	1.14472e-12	4.08283e-11	TRUE	3.96589	73.1058	403.975
sgRNA0649	SPV_2421	srf-23	-3.71028	0.281872	6.89053e-22	7.37287e-20	TRUE	11.5515	177.548	798.641
sgRNA0824	SPV_1483	murF	-3.79462	0.53287	1.56738e-07	2.83787e-06	TRUE	1.5078	21.0116	48.8683
sgRNA0134	SPV_0343,SPV_0344	gnd,ritR	-4.23649	0.640451	4.33903e-07	7.22207e-06	TRUE	1.60389	48.7372	253.573

## Sheet: Min_vs_Middle
sgRNA	target_operon_locus_tags	target_operon_names	log2FoldChange	lfcSE	pvalue	padj	significant	normcts_median_FSCMax	normcts_median_FSCMiddle	normcts_median_FSCMin
sgRNA0001	SPV_0001,SPV_0002	dnaA,dnaN	1.88811	0.151345	4.40711e-09	8.15043e-08	TRUE	20.6028	110.672	435.092
sgRNA0002	SPV_0004	ychF	-0.48021	0.205971	1	1	FALSE	368.412	152.529	109.34
sgRNA0003	SPV_0007,SPV_0008	SPV_0007,divIC	0.953036	0.360698	1	1	FALSE	67.3643	8.40464	20.5312
sgRNA0004	SPV_0012	hpt	2.09123	0.195903	2.54365e-08	4.48281e-07	TRUE	33.3998	185.953	785.432
sgRNA0005	SPV_0024,SPV_2078	purA,ccnC	-0.585984	0.222402	1	1	FALSE	266.252	201.581	152.234
sgRNA0006	SPV_0023,SPV_0024,SPV_2078	comW,purA,ccnC	-0.129899	0.101082	1	1	FALSE	395.951	409.726	363.196
sgRNA0007	SPV_2078	ccnC	-0.414943	0.163191	1	1	FALSE	297.617	200.661	137.106
sgRNA0008	SPV_0025,SPV_0026	SPV_0025,scRNA	-0.274138	0.155186	1	1	FALSE	250.754	266.403	192.56
sgRNA0009	SPV_0026	scRNA	0.429304	0.121609	1	1	FALSE	147.487	483.267	651.944
sgRNA0010	SPV_0027,SPV_0028,SPV_0029	dut,SPV_0028,radA	-0.126682	0.106448	1	1	FALSE	722.967	615.628	612.338
sgRNA0011	SPV_0030,SPV_2079	SPV_0030,prsW	-0.238036	0.235997	1	1	FALSE	218.258	329.882	270.173
sgRNA0012	SPV_0033	prs1	2.76307	0.276526	1.8206e-10	3.49649e-09	TRUE	3.96589	73.1058	403.975
sgRNA0013	SPV_2081	srf-01	-0.183825	0.121734	1	1	FALSE	534.123	476.68	455.262
sgRNA0014	SPV_2082,SPV_0037	SPV_2082,SPV_0037	0.084327	0.106157	1	1	FALSE	310.428	292.061	295.707
sgRNA0015	SPV_0039	SPV_0039	-0.351478	0.113174	1	1	FALSE	385.145	427.092	329.572
sgRNA0016	SPV_0040	yeiH	-0.177561	0.102693	1	1	FALSE	416.983	408.696	360.215
sgRNA0017	SPV_0046	blpU	-0.126694	0.120967	1	1	FALSE	472.82	412.648	399.641
sgRNA0018	SPV_0051,SPV_0052,SPV_0053,SPV_0054,SPV_0055,SPV_0056,SPV_0057,SPV_0058,SPV_0059,SPV_0060,SPV_0061,SPV_0062	purC,purL,purF,purM,purN,vanZ,purH,purD,purE,purK,SPV_0061,purB	-0.0411494	0.116431	1	1	FALSE	310.825	289.96	303.689
sgRNA0019	SPV_0058,SPV_0059,SPV_0060,SPV_0061,SPV_0062	purD,purE,purK,SPV_0061,purB	-0.212548	0.0999722	1	1	FALSE	434.06	444.325	391.87
sgRNA0020	SPV_0061,SPV_0062	SPV_0061,purB	0.9151	0.130764	1	1	FALSE	122.105	377.158	699.774
sgRNA0021	SPV_0064	cpsR	0.455081	0.121288	1	1	FALSE	97.6329	262.596	355.908
sgRNA0022	SPV_0065,SPV_0066,SPV_0067,SPV_0068,SPV_0069,SPV_0070,SPV_0071	bgaC,gadV,gadW,gadE,gadF,agaS,galM	0.607591	0.101727	1	1	FALSE	301.511	369.377	566.325
sgRNA0023	SPV_0072,SPV_0073	SPV_0072,SPV_0073	0.0161683	0.122533	1	1	FALSE	363.869	344.02	370.913
sgRNA0024	SPV_0073	SPV_0073	-0.0540146	0.121382	1	1	FALSE	383.123	349.843	356.701
sgRNA0025	SPV_0074	SPV_0074	0.0556885	0.126429	1	1	FALSE	287.514	267.984	269.964
sgRNA0026	SPV_0076	SPV_0076	0.029636	0.152561	1	1	FALSE	148.101	150.177	132.417
sgRNA0027	SPV_2092,SPV_0078	SPV_2092,SPV_0078	-0.0244839	0.0969681	1	1	FALSE	491.979	479.842	470.429
sgRNA0028	SPV_0080	pavB	-0.0603565	0.133996	1	1	FALSE	266.801	289.96	268.417
sgRNA0029	SPV_0081,SPV_0082	SPV_0081,SPV_0082	-0.19685	0.0997322	1	1	FALSE	448.823	475.826	396.33
sgRNA0030	SPV_0083	rpsD	2.21631	0.268477	5.88713e-06	9.09167e-05	TRUE	33.9979	112.412	505.037
sgRNA0031	SPV_0091	SPV_0091	-0.0975463	0.115153	1	1	FALSE	331.571	310.972	293.415
sgRNA0032	SPV_0092	SPV_0092	-0.110828	0.135499	1	1	FALSE	316.171	297.314	305.812
sgRNA0033	SPV_0093,SPV_0094,SPV_0095,SPV_0096	ptvC,ptvB,ptvA,ptvR	0.071005	0.105461	1	1	FALSE	535.869	539.998	526.313
sgRNA0034	SPV_0097	SPV_0097	-0.112539	0.126185	1	1	FALSE	268.614	258.637	248.049
sgRNA0035	SPV_0098	SPV_0098	-1.19629	0.22957	0.392536	1	FALSE	197.139	198.951	48.3386
sgRNA0036	SPV_0099	aatA	-0.724282	0.213874	1	1	FALSE	98.1517	68.2877	47.2583
sgRNA0037	SPV_2095,SPV_0101,SPV_0102,SPV_0103	SPV_2095,gph,sdhA,sdhB	-0.310738	0.131323	1	1	FALSE	289.329	269.337	211.952
sgRNA0038	SPV_0104	SPV_0104	-0.19055	0.104839	1	1	FALSE	406.51	334.748	288.908
sgRNA0039	SPV_0107,SPV_0108	SPV_0107,SPV_0108	-0.169912	0.0981092	1	1	FALSE	481.092	496.014	421.748
sgRNA0040	SPV_0112	SPV_0112	0.237765	0.154744	1	1	FALSE	242.136	213.873	273.899
sgRNA0041	SPV_0123,SPV_0124,SPV_2103	SPV_0123,SPV_0124,SPV_2103	-0.0533049	0.104897	1	1	FALSE	278.577	267.755	258.087
sgRNA0042	SPV_0119,SPV_0120,SPV_0121,SPV_2102,SPV_0122,SPV_0123,SPV_0124,SPV_2103	SPV_0119,SPV_0120,SPV_0121,SPV_2102,SPV_0122,SPV_0123,SPV_0124,SPV_2103	0.573201	0.0835952	1	1	FALSE	375.312	466.851	651.481
sgRNA0043	SPV_0126	pspA	-0.0883944	0.119049	1	1	FALSE	486.189	441.95	429.932
sgRNA0044	SPV_0127,SPV_2107,SPV_0128,SPV_0129	mnmA,srf-04,SPV_0128,mnmG	2.4409	0.159214	1.42905e-19	5.63348e-18	TRUE	23.1062	117.665	540.087
sgRNA0045	SPV_0128,SPV_0129	SPV_0128,mnmG	-0.0205573	0.13437	1	1	FALSE	247.308	333.244	317.975
sgRNA0046	SPV_0131	SPV_0131	-0.881397	0.193715	1	1	FALSE	607.791	150.059	81.9581
sgRNA0047	SPV_2109,SPV_0132	cibC,cibB	-0.0545609	0.0932161	1	1	FALSE	390.861	452.174	405.038
sgRNA0048	SPV_2109,SPV_0132,SPV_0133	cibC,cibB,cibA	-0.0871656	0.0971167	1	1	FALSE	440.903	399.561	375.508
sgRNA0049	SPV_0134	SPV_0134	1.82936	0.188746	1.11249e-05	0.000160662	TRUE	230.729	662.916	2117.67
sgRNA0050	SPV_2119	srf-05	0.206981	0.137617	1	1	FALSE	210.342	179.056	208.522
sgRNA0051	SPV_0144	mutR1	-0.0428202	0.103165	1	1	FALSE	315.043	295.213	284.432
sgRNA0052	SPV_2120	srf-06	-0.125882	0.113843	1	1	FALSE	322.447	296.769	277.01
sgRNA0053	SPV_0145,SPV_0146,SPV_0147,SPV_0148	SPV_0145,SPV_0146,SPV_0147,SPV_0148	-0.0155223	0.111425	1	1	FALSE	238.729	220.622	207.925
sgRNA0054	SPV_0146,SPV_0147,SPV_0148	SPV_0146,SPV_0147,SPV_0148	-0.0737137	0.0863091	1	1	FALSE	430.804	428.374	396.213
sgRNA0055	SPV_0147,SPV_0148	SPV_0147,SPV_0148	0.0880157	0.128757	1	1	FALSE	138.815	139.131	137.133
sgRNA0056	SPV_0150	gshT	0.10122	0.106061	1	1	FALSE	496.981	528.442	537.781
sgRNA0057	SPV_0151	metQ	0.00758838	0.11065	1	1	FALSE	281.606	332.415	341.417
sgRNA0058	SPV_0153,SPV_0154	metN,metP	0.268884	0.138282	1	1	FALSE	238.372	405.364	469.162
sgRNA0059	SPV_0155	SPV_0155	0.161849	0.189121	1	1	FALSE	539.016	494.297	497.13
sgRNA0060	SPV_0156,SPV_0157,SPV_0158	SPV_0156,SPV_0157,SPV_0158	0.104532	0.121363	1	1	FALSE	301.426	271.146	291.488
sgRNA0061	SPV_0159	SPV_0159	-0.0100335	0.14015	1	1	FALSE	283.069	257.808	234.746
sgRNA0062	SPV_0160	nrdI	-0.141011	0.128662	1	1	FALSE	312.723	274.467	254.208
sgRNA0063	SPV_0161	SPV_0161	0.00127455	0.130843	1	1	FALSE	286.842	334.073	331.675
sgRNA0064	SPV_0162,SPV_0163	SPV_0162,SPV_0163	-0.104789	0.0857652	1	1	FALSE	724.013	722.53	707.57
sgRNA0065	SPV_0165	hexB	-0.0788164	0.122858	1	1	FALSE	499.589	459.246	421.278
sgRNA0066	SPV_0166,SPV_0167,SPV_0168,SPV_0169	ribH,ribB,ribE,ribD	-0.0474613	0.134294	1	1	FALSE	358.077	321.808	328.231
sgRNA0067	SPV_0170,SPV_0171	ruvA,tag	0.0568279	0.117343	1	1	FALSE	309.347	261.66	285.286
sgRNA0068	SPV_0173	SPV_0173	-0.19834	0.141011	1	1	FALSE	252.992	265.797	215.6
sgRNA0069	SPV_0174,SPV_0175	SPV_0174,corA1	0.256343	0.189521	1	1	FALSE	155.578	243.716	283.874
sgRNA0070	SPV_0176,SPV_0177	uvrA,ypdF	0.0679984	0.169105	1	1	FALSE	128.485	111.081	110.308
sgRNA0071	SPV_0178	spxA2	0.292678	0.11623	1	1	FALSE	232.357	451.786	532.778
sgRNA0072	SPV_0180,SPV_0181,SPV_0182	SPV_0180,yqgF,SPV_0182	0.49243	0.173275	1	1	FALSE	133.265	279.842	373.955
sgRNA0073	SPV_0184	SPV_0184	0.00689905	0.11978	1	1	FALSE	280.73	324.901	325.733
sgRNA0074	SPV_0185	cls	0.471952	0.124955	1	1	FALSE	354.104	430.738	538.727
sgRNA0075	SPV_2121,SPV_0186	SPV_2121,SPV_0186	0.354483	0.120028	1	1	FALSE	229.571	262.782	326.082
sgRNA0076	SPV_0186	SPV_0186	0.550575	0.0865958	1	1	FALSE	602.708	699.686	993.292
sgRNA0077	SPV_0187,SPV_0188,SPV_0189,SPV_0190,SPV_0191	nrdD,SPV_0188,SPV_0189,nrdG,SPV_0191	0.00695945	0.105439	1	1	FALSE	476.376	429.936	457.028
sgRNA0078	SPV_0191	SPV_0191	-0.0950288	0.111852	1	1	FALSE	433.051	413.929	384.292
sgRNA0079	SPV_0192,SPV_0193,SPV_0194,SPV_0195,SPV_0196,SPV_0197,SPV_0198,SPV_0199,SPV_0200,SPV_0201,SPV_0202,SPV_0203,SPV_0204,SPV_0205,SPV_0206,SPV_0207,SPV_0208,SPV_0209,SPV_0210,SPV_0211,SPV_0212,SPV_0213	rpsJ,rplC,rplD,rplW,rplB,rpsS,rplV,rpsC,rplP,rpmC,rpsQ,rplN,rplX,rplE,rpsN,rpsH,rplF,rplR,rpsE,rpmD,rplO,secY	2.5239	0.223044	8.35726e-12	1.86853e-10	TRUE	29.1003	86.1661	427.96
sgRNA0080	SPV_0193,SPV_0194,SPV_0195,SPV_0196,SPV_0197,SPV_0198,SPV_0199,SPV_0200,SPV_0201,SPV_0202,SPV_0203,SPV_0204,SPV_0205,SPV_0206,SPV_0207,SPV_0208,SPV_0209,SPV_0210,SPV_0211,SPV_0212,SPV_0213	rplC,rplD,rplW,rplB,rpsS,rplV,rpsC,rplP,rpmC,rpsQ,rplN,rplX,rplE,rpsN,rpsH,rplF,rplR,rpsE,rpmD,rplO,secY	0.601854	0.109184	1	1	FALSE	337.084	357.851	569.046
sgRNA0081	SPV_0201,SPV_0202,SPV_0203,SPV_0204,SPV_0205,SPV_0206,SPV_0207,SPV_0208,SPV_0209,SPV_0210,SPV_0211,SPV_0212,SPV_0213	rpmC,rpsQ,rplN,rplX,rplE,rpsN,rpsH,rplF,rplR,rpsE,rpmD,rplO,secY	2.17267	0.237486	7.89896e-07	1.28616e-05	TRUE	40.4211	151.284	601.714
sgRNA0082	SPV_0215,SPV_2122,SPV_0216,SPV_0217,SPV_0218,SPV_0219	infA,rpmJ,rpsM,rpsK,rpoA,rplQ	1.7328	0.239482	0.00221375	0.027182	TRUE	20.132	120.817	289.217
sgRNA0083	SPV_0220,SPV_0221	SPV_0220,SPV_0221	-0.151799	0.110573	1	1	FALSE	330.578	323.296	310.849
sgRNA0084	SPV_2125	ccnE	-0.0646607	0.115335	1	1	FALSE	436.357	325.783	331.951
sgRNA0085	SPV_0222	gpmB1	-0.179343	0.131875	1	1	FALSE	246.211	238.567	205.514
sgRNA0086	SPV_0228,SPV_0229	SPV_0228,SPV_0229	0.0396024	0.118747	1	1	FALSE	256.74	225.297	224.624
sgRNA0087	SPV_0238	leuS	3.87849	0.305973	5.07189e-21	2.23462e-19	TRUE	3.42605	12.0142	144.088
sgRNA0088	SPV_0239	SPV_0239	0.0527189	0.110872	1	1	FALSE	261.03	243.735	253.282
sgRNA0089	SPV_2129	ccnA	-0.198027	0.0992972	1	1	FALSE	348.547	304.668	271.314
sgRNA0090	SPV_2131	srf-07	-0.0658336	0.11337	1	1	FALSE	577.931	547.352	536.967
sgRNA0091	SPV_2132	SPV_2132	-0.0287197	0.12379	1	1	FALSE	261.47	252.298	250.358
sgRNA0092	SPV_0241	ruvB	0.168137	0.134527	1	1	FALSE	378.29	358.248	383.098
sgRNA0093	SPV_0243,SPV_0244,SPV_0245,SPV_0246	uppS,cdsA,eep,proS	3.28881	0.317775	5.90636e-13	1.4044e-11	TRUE	14.8298	99.8051	839.383
sgRNA0094	SPV_0247	bglA	0.00686178	0.14585	1	1	FALSE	306.111	296.264	269.112
sgRNA0095	SPV_0248	glmS	-0.557427	0.3289	1	1	FALSE	19.9942	97.704	56.1681
sgRNA0096	SPV_0249	SPV_0249	-0.175134	0.0822494	1	1	FALSE	749.399	686.957	603.44
sgRNA0097	SPV_0250	spuA	-0.0405275	0.112973	1	1	FALSE	243.693	271.937	253.22
sgRNA0098	SPV_0251,SPV_0252	rpsL,rpsG	2.13445	0.219673	2.41364e-07	4.10867e-06	TRUE	23.2439	64.8222	249.574
sgRNA0099	SPV_0253	fusA	1.47922	0.173898	0.00585516	0.0690632	FALSE	30.6126	116.614	233.114
sgRNA0100	SPV_0254	polC	0.981675	0.203247	1	1	FALSE	60.116	139.266	252.021
sgRNA0101	SPV_0255	relB1	-0.142965	0.117605	1	1	FALSE	244.958	301.186	271.708
sgRNA0102	SPV_0260	rsuA-1	-0.18063	0.12341	1	1	FALSE	599.679	571.531	548.801
sgRNA0103	SPV_0261	pepC	0.0068029	0.0905974	1	1	FALSE	407.546	382.609	379.693
sgRNA0104	SPV_0262,SPV_0263,SPV_0264	manN,manM,manL	1.23875	0.228249	0.295563	1	FALSE	106.161	260.544	624.315
sgRNA0105	SPV_0265	adhA	-0.117029	0.140026	1	1	FALSE	311.938	273.752	275.174
sgRNA0106	SPV_2134	SPV_2134	-0.135826	0.136512	1	1	FALSE	330.751	297.314	261.98
sgRNA0107	SPV_0266	SPV_0266	0.0483406	0.0921254	1	1	FALSE	422.931	376.108	365.453
sgRNA0108	SPV_0267	SPV_0267	-0.0872343	0.11383	1	1	FALSE	332.811	333.822	303.489
sgRNA0109	SPV_0269	sulA	0.674323	0.176438	1	1	FALSE	107.71	183.645	287.074
sgRNA0110	SPV_0273	SPV_0273	0.115107	0.111915	1	1	FALSE	298.408	267.744	284.221
sgRNA0111	SPV_0274,SPV_0275	rplM,rpsI	2.12344	0.252646	8.71927e-06	0.000131934	TRUE	31.7805	168.093	572.283
sgRNA0112	SPV_0279,SPV_0280,SPV_0281,SPV_0282,SPV_0283	celB,celR,celC,SPV_0282,celD	-0.112406	0.112396	1	1	FALSE	195.817	214.187	179.996
sgRNA0113	SPV_0280,SPV_0281,SPV_0282,SPV_0283	celR,celC,SPV_0282,celD	-0.0762363	0.137113	1	1	FALSE	235.917	203.953	194.609
sgRNA0114	SPV_0277,SPV_0278,SPV_0279,SPV_0280,SPV_0281,SPV_0282,SPV_0283	celA,SPV_0278,celB,celR,celC,SPV_0282,celD	0.011831	0.162845	1	1	FALSE	141.531	126.832	124.96
sgRNA0115	SPV_0284	SPV_0284	0.130149	0.137658	1	1	FALSE	132.61	135.178	137.933
sgRNA0116	SPV_0286	basA	0.0434786	0.11073	1	1	FALSE	324.852	330.39	324.717
sgRNA0117	SPV_0288,SPV_2140	SPV_0288,SPV_2140	0.108697	0.137117	1	1	FALSE	273.299	241.633	256.936
sgRNA0118	SPV_0289,SPV_0290,SPV_0291,SPV_0292	eda,SPV_0290,SPV_0291,SPV_0292	-0.017269	0.0988642	1	1	FALSE	474.101	426.503	426.795
sgRNA0119	SPV_0301	regR	-0.031158	0.0914948	1	1	FALSE	445.103	473.702	493.822
sgRNA0120	SPV_0303	SPV_0303	-0.0631718	0.112575	1	1	FALSE	536.723	501.977	472.142
sgRNA0121	SPV_0304	mraW	3.938	0.864457	0.000677155	0.0086699	TRUE	0	1.28256	19.1722
sgRNA0122	SPV_0306,SPV_0307	pbp2x,mraY	1.24275	0.528897	0.646248	1	FALSE	3.70481	7.11463	13.99
sgRNA0123	SPV_0308	clpL	-0.230784	0.101469	1	1	FALSE	519.711	449.803	372.258
sgRNA0124	SPV_0309	luxS	-0.161611	0.102378	1	1	FALSE	287.792	263.241	232.96
sgRNA0125	SPV_0310	SPV_0310	0.115544	0.105177	1	1	FALSE	421.891	380.495	403.866
sgRNA0126	SPV_0311,SPV_0313	dexB,SPV_0313	-0.0166704	0.100122	1	1	FALSE	336.844	318.326	311.557
sgRNA0127	SPV_0315,SPV_0316,SPV_0317,SPV_0318,SPV_0319,SPV_0320,SPV_0321,SPV_0322,SPV_0323,SPV_0324,SPV_0325,SPV_0326,SPV_0327,SPV_0328,SPV_0329,SPV_0330	cps2A,cps2B,cps2C,cps2D,cps2E,cps2T,cps2F,cps2G,cps2H,cps2I,cps2J,cps2K,cps2P,cps2L,cps2M,cps2N	0.187066	0.224139	1	1	FALSE	108.016	51.3958	66.8599
sgRNA0128	SPV_0321,SPV_0322,SPV_0323,SPV_0324,SPV_0325,SPV_0326,SPV_0327,SPV_0328,SPV_0329,SPV_0330	cps2F,cps2G,cps2H,cps2I,cps2J,cps2K,cps2P,cps2L,cps2M,cps2N	-0.704986	0.138747	1	1	FALSE	406.901	255.73	154.71
sgRNA0129	SPV_0334	aliA	-0.146375	0.098123	1	1	FALSE	580.967	560.478	513.725
sgRNA0130	SPV_0336,SPV_0337	pbp1a,recU	2.13703	0.169723	2.09359e-11	4.5452e-10	TRUE	16.7462	184.688	757.043
sgRNA0131	SPV_0338	SPV_0338	0.00648877	0.137284	1	1	FALSE	159.294	187.346	183.527
sgRNA0132	SPV_0339	gpsB	0.186868	0.336062	1	1	FALSE	54.8811	26.087	26.2741
sgRNA0133	SPV_0340	rnpB	1.61429	0.207689	0.00309909	0.0377434	TRUE	105.439	426.536	1064.6
sgRNA0134	SPV_0343,SPV_0344	gnd,ritR	2.84072	0.527986	0.000489747	0.00637949	TRUE	1.60389	48.7372	253.573
sgRNA0135	SPV_0346,SPV_0347,SPV_0348,SPV_0349	mvk,mvaD,mvaK2,fni	-0.29541	0.260856	1	1	FALSE	63.9741	191.491	155.944
sgRNA0136	SPV_0350,SPV_0351,SPV_0352,SPV_2148	vraT,vraS,vraR,alkD	0.0162756	0.101936	1	1	FALSE	432.326	402.877	387.132
sgRNA0137	SPV_0355,SPV_0356,SPV_0357	SPV_0355,cbpG,cbpK	-0.151692	0.131163	1	1	FALSE	396.636	337.55	303.192
sgRNA0138	SPV_0365	tig	0.583767	0.140016	1	1	FALSE	123.455	232.939	320.457
sgRNA0139	SPV_0367,SPV_0368	lepB,rnhC	1.2222	0.173095	0.199248	1	FALSE	88.9015	350.894	758.785
sgRNA0140	SPV_0369,SPV_0370	zapA,zapB	-0.570743	0.154081	1	1	FALSE	318.244	211.106	138.548
sgRNA0141	SPV_0372	glyP	0.588656	0.122027	1	1	FALSE	248.832	538.674	765.205
sgRNA0142	SPV_0373	mip	-0.222334	0.109669	1	1	FALSE	409.446	371.376	321.243
sgRNA0143	SPV_0374	shetA	0.127315	0.120094	1	1	FALSE	207.258	198.951	206.592
sgRNA0144	SPV_0375	serS	3.30316	0.199904	1.0304e-30	1.10252e-28	TRUE	17.4529	125.019	1051.99
sgRNA0145	SPV_0375,SPV_0376,SPV_0377	serS,manO,lysC	-0.0523046	0.104734	1	1	FALSE	329.068	442.667	413.427
sgRNA0146	SPV_0378,SPV_0379,SPV_0380,SPV_0381	fabM,fabT,fabH,acpP	-0.551176	0.139532	1	1	FALSE	350.708	270.62	187.484
sgRNA0147	SPV_0379,SPV_0380,SPV_0381	fabT,fabH,acpP	0.884813	0.220435	1	1	FALSE	16.0184	69.5106	117.202
sgRNA0148	SPV_0382,SPV_0383,SPV_0384,SPV_0385,SPV_0386,SPV_0387,SPV_0388,SPV_0389,SPV_0390	fabK,fabD,fabG1,fabF,accB,fabZ,accC,accD,accA	0.628992	0.207803	1	1	FALSE	68.9945	211.622	362.788
sgRNA0149	SPV_0391,SPV_2157	SPV_0391,ydiL	-0.186583	0.138201	1	1	FALSE	358.062	346.691	280.655
sgRNA0150	SPV_0393,SPV_0394,SPV_0395	nusB,SPV_0394,efp	0.944002	0.105011	1	1	FALSE	107.129	348.994	678.431
sgRNA0151	SPV_0396,SPV_0397,SPV_0398	gatB,gatA,gatC	3.76841	0.568136	1.10032e-06	1.77235e-05	TRUE	2.38398	14.0924	166.983
sgRNA0152	SPV_0399	prfC	0.0757648	0.135334	1	1	FALSE	291.779	201.438	235.097
sgRNA0153	SPV_0401	rpmB	0.190079	0.0936167	1	1	FALSE	441.96	479.065	534.809
sgRNA0154	SPV_0402	asp23	0.259304	0.107275	1	1	FALSE	371.896	402.723	509.689
sgRNA0155	SPV_0404,SPV_0405,SPV_0406,SPV_2159,SPV_0408	ilvB,ilvH,ilvC,SPV_2159,SPV_0408	-0.0292486	0.0964434	1	1	FALSE	413.812	417.798	422.492
sgRNA0156	SPV_0409	ilvA	-0.0726375	0.0974604	1	1	FALSE	473.336	513.734	475.589
sgRNA0157	SPV_0410	SPV_0410	0.648893	0.109504	1	1	FALSE	294.505	509.531	841.832
sgRNA0158	SPV_0411,SPV_0412	glnQ1,glnHP1	-0.286264	0.149557	1	1	FALSE	284.79	235.135	191.798
sgRNA0159	SPV_0414	SPV_0414	0.0485594	0.102361	1	1	FALSE	421.092	457.588	486.987
sgRNA0160	SPV_0417	uppP	-0.37315	0.231551	1	1	FALSE	424.061	214.702	176.738
sgRNA0161	SPV_0420	pfl	0.0872308	0.137668	1	1	FALSE	191.501	201.581	219.455
sgRNA0162	SPV_0423	xylR	0.0574772	0.12359	1	1	FALSE	224.663	224.649	240.116
sgRNA0163	SPV_0429,SPV_0430	trkH,trkA	0.194068	0.126278	1	1	FALSE	331.815	432.51	451.328
sgRNA0164	SPV_0431	SPV_0431	-0.114187	0.106914	1	1	FALSE	307.244	331.586	280.438
sgRNA0165	SPV_0434	mtsB	-0.370697	0.170762	1	1	FALSE	170.116	157.042	117.531
sgRNA0166	SPV_2167	srf-09	0.647374	0.169763	1	1	FALSE	207.607	441.092	672.421
sgRNA0167	SPV_0441	rpoE	2.42308	0.221972	1.44476e-10	2.8477e-09	TRUE	33.9875	344.664	1856.08
sgRNA0168	SPV_0442	pyrG	0.0459642	0.187742	1	1	FALSE	199.44	182.372	168.916
sgRNA0169	SPV_0443	nptA	0.915322	0.13512	1	1	FALSE	168.423	485.716	873.96
sgRNA0170	SPV_0444	endoD	-0.00249334	0.116271	1	1	FALSE	374.016	360.425	328.362
sgRNA0171	SPV_0445	pgk	2.09076	0.204214	9.23039e-08	1.58932e-06	TRUE	129.804	604.084	2265.47
sgRNA0172	SPV_0446	SPV_0446	-0.498333	0.102303	1	1	FALSE	511.702	389.898	282.117
sgRNA0173	SPV_0447,SPV_0448	glnR,glnA	-0.330966	0.170333	1	1	FALSE	193.214	94.3971	76.1864
sgRNA0174	SPV_0452	creX	0.157172	0.192134	1	1	FALSE	191.314	170.58	185.303
sgRNA0175	SPV_2170,SPV_0454,SPV_0455	hsdS-F,hsdM,hsdR	-0.164231	0.114166	1	1	FALSE	445.972	469.566	396.806
sgRNA0176	SPV_0458,SPV_0459,SPV_0460,SPV_2171,SPV_0461	hrcA,grpE,dnaK,SPV_2171,dnaJ	0.255317	0.0850153	1	1	FALSE	428.308	563.043	697.197
sgRNA0177	SPV_0462,SPV_0463	SPV_0462,SPV_0463	-0.0542342	0.111619	1	1	FALSE	341.414	336.03	318.53
sgRNA0178	SPV_0464,SPV_0465	ecsA,ecsB	0.195289	0.123507	1	1	FALSE	671.034	976.52	1096.66
sgRNA0179	SPV_0466	blpT	-0.0439162	0.141054	1	1	FALSE	179.247	157.042	162.17
sgRNA0180	SPV_0467,SPV_0468,SPV_0469	blpS,blpR,blpH	-0.286495	0.131863	1	1	FALSE	276.516	260.079	219.73
sgRNA0181	SPV_0470,SPV_0471,SPV_0472,SPV_2175	blpC,blpB,blpA,SPV_2175	-0.104232	0.100522	1	1	FALSE	438.239	413.631	367.31
sgRNA0182	SPV_2176,SPV_0473,SPV_0474,SPV_0475	pncW,blpY,blpZ,pncP	0.078744	0.160627	1	1	FALSE	302.605	283.506	325.494
sgRNA0183	SPV_0476,SPV_0477	SPV_0476,trmB	0.967701	0.122842	1	1	FALSE	54.8674	177.638	327.224
sgRNA0184	SPV_0478,SPV_0479,SPV_0480,SPV_0481,SPV_0482,SPV_0483	rimP,nusA,SPV_0480,SPV_0481,infB,rbfA	1.1548	0.172577	0.36973	1	FALSE	104.79	304.668	661.203
sgRNA0185	SPV_0487,SPV_0488	SPV_0487,SPV_0488	-0.0414819	0.113495	1	1	FALSE	327.697	343.54	331.73
sgRNA0186	SPV_0490	SPV_0490	0.0180438	0.105409	1	1	FALSE	431.931	418.973	432.122
sgRNA0187	SPV_0495,SPV_0496	SPV_0495,SPV_0496	0.567961	0.160763	1	1	FALSE	118.652	173.145	240.284
sgRNA0188	SPV_2178,SPV_2179	SPV_2178,SPV_2179	-0.0155943	0.109534	1	1	FALSE	494.622	470.023	434.587
sgRNA0189	SPV_0500,SPV_2185,SPV_2180	SPV_0500,srf-10,SPV_2180	0.20821	0.124517	1	1	FALSE	272.841	261.953	314.909
sgRNA0190	SPV_2185	srf-10	-0.0247876	0.132147	1	1	FALSE	216.665	229.623	218.039
sgRNA0191	SPV_0504,SPV_0505	pheS,paiA	2.64745	0.168489	1.40237e-22	7.24396e-21	TRUE	30.6634	178.599	978.43
sgRNA0192	SPV_0507	SPV_0507	-0.00515738	0.146367	1	1	FALSE	169.787	151.342	133.59
sgRNA0193	SPV_0510,SPV_0511	metE,metF	-0.0312054	0.10676	1	1	FALSE	545.344	558.659	543.198
sgRNA0194	SPV_0512,SPV_0513,SPV_0514,SPV_0515,SPV_0516,SPV_0517	pnp,cysE,SPV_0514,cysS,mrnC,SPV_0517	2.96707	0.195558	8.40869e-24	4.66526e-22	TRUE	47.5211	305.139	2250.34
sgRNA0195	SPV_0521,SPV_0522,SPV_0523	vex1,vex2,vex3	-0.0627167	0.140848	1	1	FALSE	195.829	170.58	176.533
sgRNA0196	SPV_0524,SPV_0525	vncR,vncS	0.0183542	0.105192	1	1	FALSE	249.893	246.251	248.249
sgRNA0197	SPV_0526	fba	2.97567	0.210176	5.45462e-21	2.33458e-19	TRUE	38.6647	492.722	3060.5
sgRNA0198	SPV_0527	SPV_0527	-0.0537063	0.0780289	1	1	FALSE	634.898	623.381	602.19
sgRNA0199	SPV_0528,SPV_0529,SPV_0530,SPV_0531,SPV_2191	glnP2b,glnP2a,glnH2,glnQ2,SPV_2191	0.00793306	0.1142	1	1	FALSE	517.374	435.085	460.407
sgRNA0200	SPV_0532	recJ	-0.0634914	0.102597	1	1	FALSE	535.441	422.772	410.865
sgRNA0201	SPV_0533	rnjB	-0.426814	0.200981	1	1	FALSE	375.566	81.423	57.8126
sgRNA0202	SPV_0535,SPV_0536	murM,murN	-0.380885	0.168434	1	1	FALSE	364.559	229.986	164.796
sgRNA0203	SPV_0537	SPV_0537	-0.00891366	0.111755	1	1	FALSE	409.115	363.858	350.99
sgRNA0204	SPV_0538,SPV_0539	uvrC,SPV_0539	-0.12959	0.0914893	1	1	FALSE	521.129	505.453	437.285
sgRNA0205	SPV_0540	SPV_0540	0.0435479	0.0880393	1	1	FALSE	615.798	573.248	573.586
sgRNA0206	SPV_0541,SPV_0542	nrd,pepV	0.052878	0.150631	1	1	FALSE	520.553	622.135	693.461
sgRNA0207	SPV_0546	brnQ	0.0166176	0.100809	1	1	FALSE	349.287	358.942	365.793
sgRNA0208	SPV_0547,SPV_0548,SPV_0549	SPV_0547,SPV_0548,ldcB	-0.298679	0.0887693	1	1	FALSE	724.753	754.151	613.115
sgRNA0209	SPV_0550,SPV_0551	rplK,rplA	1.27807	0.165513	0.0929497	0.947201	FALSE	52.0423	179.056	463.56
sgRNA0210	SPV_2193	SPV_2193	-0.0181757	0.10159	1	1	FALSE	728.924	644.269	630.17
sgRNA0211	SPV_0554	SPV_0554	-0.0544221	0.111483	1	1	FALSE	463.472	441.092	418.854
sgRNA0212	SPV_0558	prtA	-0.362549	0.153529	1	1	FALSE	643.846	279.759	191.145
sgRNA0213	SPV_0564	SPV_0564	-0.542815	0.159615	1	1	FALSE	324.846	279.361	179.533
sgRNA0214	SPV_0571,SPV_0572,SPV_0573	ccdA-1,SPV_0572,msrAB2	-0.0591191	0.122916	1	1	FALSE	363.036	358.894	326.752
sgRNA0215	SPV_0574,SPV_0575	yesN,yesM	-0.252184	0.0919889	1	1	FALSE	703.384	688.869	570.685
sgRNA0216	SPV_0576	ywlG	-0.259751	0.133666	1	1	FALSE	458.056	387.664	338.704
sgRNA0217	SPV_0578	pabB	-0.0303626	0.101452	1	1	FALSE	533.34	494.892	452.039
sgRNA0218	SPV_0579	cbpL	-0.0920047	0.103561	1	1	FALSE	357.933	373.298	348.603
sgRNA0219	SPV_0580	gki	0.0567622	0.113576	1	1	FALSE	318.012	331.586	360.587
sgRNA0220	SPV_0581	thyA	0.123982	0.145202	1	1	FALSE	217.1	307.82	332.708
sgRNA0221	SPV_0582	SPV_0582	1.04556	0.116585	0.695974	1	FALSE	276.392	360.349	700.9
sgRNA0222	SPV_0583,SPV_0584,SPV_0585,SPV_0586,SPV_0587	miaA,hflX,SPV_0585,rnz,SPV_0587	1.44325	0.125053	0.000393346	0.0051687	TRUE	155.517	668.169	1782.32
sgRNA0223	SPV_0588	mtaR	-0.342037	0.144613	1	1	FALSE	891.396	613.439	476.863
sgRNA0224	SPV_0589,SPV_0590	SPV_0589,SPV_0590	0.00360304	0.085787	1	1	FALSE	771.233	806.846	805.464
sgRNA0225	SPV_0592	rsuA-2	-0.247724	0.120779	1	1	FALSE	744.886	633.992	532.087
sgRNA0226	SPV_0593,SPV_0594	typA,SPV_0594	-0.0871323	0.110586	1	1	FALSE	223.851	384.454	364.373
sgRNA0227	SPV_0595,SPV_0596,SPV_0597	SPV_0595,SPV_0596,SPV_0597	-0.080224	0.11226	1	1	FALSE	465.763	430.04	382.489
sgRNA0228	SPV_0598,SPV_0599	murD,murG	0.213469	0.696009	1	1	FALSE	0.391622	5.14893	7.28345
sgRNA0229	SPV_0610	SPV_0610	-0.218455	0.112807	1	1	FALSE	571.754	546.288	466.017
sgRNA0230	SPV_0608,SPV_0609,SPV_0610	pyrF,pyrE,SPV_0610	-0.0900158	0.0972027	1	1	FALSE	562.474	505.139	476.86
sgRNA0231	SPV_0615,SPV_0616,SPV_0617,SPV_0618	glnH3,glnQ3,glnP3b,glnP3a	-0.0831058	0.125319	1	1	FALSE	437.048	391.866	398.223
sgRNA0232	SPV_0620	lysS	3.08279	0.215279	3.85593e-22	1.9254e-20	TRUE	27.0133	234.279	1538.77
sgRNA0233	SPV_0633,SPV_0634,SPV_0635	copY,cupA,ctpA	0.0376554	0.095337	1	1	FALSE	326.525	300.119	312.062
sgRNA0234	SPV_0636	spxB	0.732804	0.152455	1	1	FALSE	290.237	657.952	1124.31
sgRNA0235	SPV_0641	manA	0.346043	0.169214	1	1	FALSE	141.882	134.669	171.148
sgRNA0236	SPV_0644,SPV_0645	SPV_0644,SPV_0645	-0.183453	0.0950701	1	1	FALSE	662.458	690.231	578.206
sgRNA0237	SPV_0646	SPV_0646	-0.443662	0.115607	1	1	FALSE	466.841	385.771	274.974
sgRNA0238	SPV_0647,SPV_0648	SPV_0647,comEB	-0.10816	0.11777	1	1	FALSE	265.119	239.532	230.496
sgRNA0239	SPV_0649	upp	0.373641	0.210548	1	1	FALSE	301.294	694.248	884.112
sgRNA0240	SPV_0650	clpP	1.0722	0.149955	0.630158	1	FALSE	311.604	661.8	1330.98
sgRNA0241	SPV_0651	SPV_0651	0.0956048	0.119291	1	1	FALSE	249.549	266.028	252.944
sgRNA0242	SPV_0652	livJ	-0.0668529	0.116149	1	1	FALSE	395.408	366.799	337.818
sgRNA0243	SPV_0657	SPV_0657	-0.150255	0.129247	1	1	FALSE	213.601	215.02	199.434
sgRNA0244	SPV_2217	SPV_2217	1.46507	0.160143	0.00368343	0.0441422	TRUE	115.244	381.361	942.996
sgRNA0245	SPV_0661	malT	-0.136963	0.102881	1	1	FALSE	398.559	377.866	335.691
sgRNA0246	SPV_0663	yqfR	0.960298	0.147717	1	1	FALSE	54.839	160.474	334.653
sgRNA0247	SPV_0664	metK	0.276402	0.24279	1	1	FALSE	164.923	208.899	246.187
sgRNA0248	SPV_0665,SPV_0666	pyrDa,holA	-0.104185	0.114054	1	1	FALSE	510.73	502.177	477.663
sgRNA0249	SPV_0667	sodA	0.114952	0.235127	1	1	FALSE	115.29	145.886	152.213
sgRNA0250	SPV_0668	SPV_0668	0.181275	0.114015	1	1	FALSE	326.841	330.39	359.451
sgRNA0251	SPV_0672	ppiA	0.220674	0.137047	1	1	FALSE	237.605	227.013	257.165
sgRNA0252	SPV_0673,SPV_2218	SPV_0673,SPV_2218	0.204349	0.150602	1	1	FALSE	209.711	211.964	251.253
sgRNA0253	SPV_0674,SPV_0675	rpsP,khpA	2.18786	0.270367	1.11541e-05	0.000160662	TRUE	17.6063	39.4751	187.56
sgRNA0254	SPV_2220,SPV_0676	SPV_2220,SPV_0676	1.24334	0.145584	0.0946244	0.957752	FALSE	153.572	419.763	968.381
sgRNA0255	SPV_0681	SPV_0681	0.105561	0.112029	1	1	FALSE	217.347	204.754	233.686
sgRNA0256	SPV_0684	bioY	-0.0867026	0.0793716	1	1	FALSE	614.755	663.171	628.906
sgRNA0257	SPV_0685	gor	-0.0974508	0.0875441	1	1	FALSE	473.256	463.391	435.218
sgRNA0258	SPV_0686,SPV_0687,SPV_0688	SPV_0686,SPV_0687,SPV_0688	-0.00937837	0.126925	1	1	FALSE	264.32	272.727	259.338
sgRNA0259	SPV_0689	metG	3.55226	0.18866	1.06372e-41	7.96724e-39	TRUE	10.038	61.9842	694.246
sgRNA0260	SPV_0691	SPV_0691	0.082059	0.138885	1	1	FALSE	182.953	160.819	163.95
sgRNA0261	SPV_0693	SPV_0693	-0.0691488	0.124199	1	1	FALSE	329.39	286.166	266.509
sgRNA0262	SPV_0694,SPV_0695	SPV_0694,fabG2	0.0119144	0.128068	1	1	FALSE	203.964	198.797	204.336
sgRNA0263	SPV_0698	SPV_0698	-0.0258445	0.104814	1	1	FALSE	523.502	489.57	481.881
sgRNA0264	SPV_0700	pepN	0.0679172	0.123645	1	1	FALSE	233.922	259.077	251.422
sgRNA0265	SPV_0701,SPV_0702	ciaR,ciaH	0.205059	0.324436	1	1	FALSE	74.308	106.107	127.561
sgRNA0266	SPV_0703	SPV_0703	-0.156641	0.200085	1	1	FALSE	223.364	124.433	99.0448
sgRNA0267	SPV_0704	SPV_0704	0.0370653	0.124558	1	1	FALSE	395.414	315.415	326.569
sgRNA0268	SPV_0705	yoaA	1.36794	0.183018	0.044391	0.4784	FALSE	74.5823	264.746	686.648
sgRNA0269	SPV_0708	SPV_0708	0.525652	0.18694	1	1	FALSE	146.199	187.003	240.904
sgRNA0270	SPV_0710	ezrA	0.952411	0.216857	1	1	FALSE	397.874	244.785	464.981
sgRNA0271	SPV_0714	SPV_0714	-0.201804	0.0984994	1	1	FALSE	768.836	565.608	515.366
sgRNA0272	SPV_0717	clpE	0.0645774	0.0866691	1	1	FALSE	452.172	444.269	427.649
sgRNA0273	SPV_0718	SPV_0718	-0.139823	0.10827	1	1	FALSE	571.771	539.921	509.256
sgRNA0274	SPV_0719,SPV_0720,SPV_0721	glnP4,glnQ4,folD	0.0985775	0.131366	1	1	FALSE	235.097	278.315	290.943
sgRNA0275	SPV_0721	folD	1.06805	0.31206	0.827381	1	FALSE	398.828	619.842	1131.4
sgRNA0276	SPV_0722	nnrD	0.0817856	0.13348	1	1	FALSE	255.577	263.611	268.137
sgRNA0277	SPV_0723,SPV_0724,SPV_0725,SPV_0726	rpiA,deoB,SPV_0725,SPV_0726	0.253863	0.110507	1	1	FALSE	334.088	406.571	476.221
sgRNA0278	SPV_0732	rpsT	0.473944	0.108904	1	1	FALSE	301.674	384.19	515.373
sgRNA0279	SPV_0733	coaA	-0.0324949	0.122114	1	1	FALSE	381.432	387.028	381.466
sgRNA0280	SPV_0735	SPV_0735	-0.220209	0.132895	1	1	FALSE	840.543	818.68	774.934
sgRNA0281	SPV_0737,SPV_0738,SPV_0739	deoC,cdd-1,SPV_0739	0.261746	0.219198	1	1	FALSE	129.89	276.326	323.94
sgRNA0282	SPV_0745	plsY	1.14918	0.191757	0.436577	1	FALSE	231.311	709.142	1423.77
sgRNA0283	SPV_0746	parE	0.158589	0.179619	1	1	FALSE	99.3537	115.851	121.406
sgRNA0284	SPV_0749,SPV_0750,SPV_0751,SPV_0752,SPV_0753	ilvE,SPV_0750,SPV_0751,SPV_0752,pcp1	0.0394868	0.186765	1	1	FALSE	107.137	107.735	115.202
sgRNA0285	SPV_0754,SPV_0755	SPV_0754,tRNA-Tyr-1	0.370477	0.0978149	1	1	FALSE	324.422	382.202	501.054
sgRNA0286	SPV_0757	rpsA	2.9397	0.16768	5.99408e-31	6.90702e-29	TRUE	124.392	1348.94	9795.95
sgRNA0287	SPV_0759	SPV_0759	0.935561	0.161104	1	1	FALSE	55.639	124.345	244.797
sgRNA0288	SPV_0761	SPV_0761	0.202483	0.133001	1	1	FALSE	281.34	304.348	355.264
sgRNA0289	SPV_0762,SPV_0763,SPV_0764,SPV_0765,SPV_0766	sufC,sufD,sufS,sufE2,sufB	0.0878779	0.0870529	1	1	FALSE	503.277	600.709	644.585
sgRNA0290	SPV_0767	pbp3	-0.141405	0.0933252	1	1	FALSE	831.779	416.831	388.111
sgRNA0291	SPV_0769	ssrA	0.220214	0.103954	1	1	FALSE	468.586	523.475	631.614
sgRNA0292	SPV_0770	tRNA-Ser-1	-0.137231	0.103563	1	1	FALSE	442.881	391.271	345.066
sgRNA0293	SPV_0771,SPV_0772	fruR,fruB	-0.12205	0.112253	1	1	FALSE	724.912	632.46	547.18
sgRNA0294	SPV_0774	ftsK	0.440434	0.116508	1	1	FALSE	297.718	364.551	505.925
sgRNA0295	SPV_0775	SPV_0775	-0.0576921	0.199604	1	1	FALSE	264.376	349.843	347.297
sgRNA0296	SPV_0776,SPV_0777	SPV_0776,thiI	-0.273429	0.0850636	1	1	FALSE	569.256	548.935	454.745
sgRNA0297	SPV_0778,SPV_2238,SPV_0781	SPV_0778,SPV_2238,SPV_0781	0.00999378	0.1154	1	1	FALSE	411.273	393.676	402.805
sgRNA0298	SPV_0782,SPV_0783,SPV_0784,SPV_0785	SPV_0782,SPV_0783,SPV_0784,SPV_0785	0.0558359	0.111515	1	1	FALSE	334.541	338.113	341.67
sgRNA0299	SPV_0784,SPV_0785	SPV_0784,SPV_0785	-0.110864	0.0985468	1	1	FALSE	324.939	338.971	286.451
sgRNA0300	SPV_0786,SPV_0787	argR2,pepX	-0.03071	0.113354	1	1	FALSE	509.605	534.631	494.831
sgRNA0301	SPV_0788	dnaE	0.110677	0.10127	1	1	FALSE	569.622	463.241	501.104
sgRNA0302	SPV_0789,SPV_0790	pfkA,pyk	3.53594	0.217087	1.58078e-31	2.15273e-29	TRUE	16.8283	104.007	897.521
sgRNA0303	SPV_0790	pyk	3.27773	0.194121	8.57675e-32	1.2848e-29	TRUE	25.7849	167.589	1666.85
sgRNA0304	SPV_0792,SPV_0793	SPV_0792,SPV_0793	0.000250674	0.0968863	1	1	FALSE	406.587	365.218	359.916
sgRNA0305	SPV_0799	SPV_0799	-0.0604469	0.0938972	1	1	FALSE	407.36	366.812	354.085
sgRNA0306	SPV_0802	tex	-0.00322896	0.0900524	1	1	FALSE	311.882	349.407	340.086
sgRNA0307	SPV_0803	SPV_0803	-0.102704	0.0791022	1	1	FALSE	731.555	762.721	706.732
sgRNA0308	SPV_2245	SPV_2245	0.161509	0.0868302	1	1	FALSE	575.556	538.674	603.997
sgRNA0309	SPV_2246	SPV_2246	-0.307274	0.0910404	1	1	FALSE	334.053	359.567	308.659
sgRNA0310	SPV_2247	srf-13	-0.0780251	0.114466	1	1	FALSE	404.535	374.507	382.776
sgRNA0311	SPV_0816	SPV_0816	-0.0445679	0.128994	1	1	FALSE	245.408	268.055	269.907
sgRNA0312	SPV_2249,SPV_0817	SPV_2249,SPV_0817	-0.119689	0.123226	1	1	FALSE	602.392	576.285	546.072
sgRNA0313	SPV_0818,SPV_0819	cmbR,lspA	0.382116	0.19461	1	1	FALSE	265.917	600.709	658.792
sgRNA0314	SPV_0822	proB	-0.171503	0.099274	1	1	FALSE	687.36	678.801	607.403
sgRNA0315	SPV_0825	tmk	0.952259	0.142768	1	1	FALSE	44.2121	143.647	268.786
sgRNA0316	SPV_2251,SPV_0832	SPV_2251,SPV_0832	-0.273019	0.115321	1	1	FALSE	362.715	361.681	304.668
sgRNA0317	SPV_0833	trmFO	-0.123435	0.127149	1	1	FALSE	358.237	377.075	385.841
sgRNA0318	SPV_0834	pyrH	0.44799	0.202943	1	1	FALSE	15.7883	74.6595	92.0186
sgRNA0319	SPV_0838,SPV_0839,SPV_2252	phoH,SPV_0839,SPV_2252	-0.0108962	0.105417	1	1	FALSE	338.973	347.553	337.931
sgRNA0320	SPV_0842	SPV_0842	0.0182044	0.137459	1	1	FALSE	352.21	350.894	339.975
sgRNA0321	SPV_2256,SPV_2257,SPV_0846	SPV_2256,SPV_2257,SPV_0846	-0.0535856	0.113627	1	1	FALSE	497.858	460.438	427.331
sgRNA0322	SPV_0843,SPV_0844,SPV_2256,SPV_2257,SPV_0846	comEA,comEC,SPV_2256,SPV_2257,SPV_0846	-0.00111328	0.107822	1	1	FALSE	449.796	426.088	421.635
sgRNA0323	SPV_2258	srf-14	2.45313	0.224332	9.32064e-11	1.91265e-09	TRUE	19.6138	71.4394	282.261
sgRNA0324	SPV_0851,SPV_0852,SPV_0853	pyrK,pyrDb,lytB	-0.144922	0.119437	1	1	FALSE	371.294	373.913	333.435
sgRNA0325	SPV_0853	lytB	-0.0934449	0.12749	1	1	FALSE	545.315	519.184	514.174
sgRNA0326	SPV_0854	pavA	-0.0368616	0.119111	1	1	FALSE	442.884	400	389.359
sgRNA0327	SPV_0855,SPV_0856	ybeY,dgkA	0.366375	0.140883	1	1	FALSE	175.558	257.808	349.83
sgRNA0328	SPV_0861	secG	-0.467509	0.225712	1	1	FALSE	249.046	147.081	104.35
sgRNA0329	SPV_0865	coiA	-0.162178	0.109013	1	1	FALSE	860.966	841.399	778.585
sgRNA0330	SPV_0866,SPV_0867	pepF1,SPV_0867	-0.0756086	0.109036	1	1	FALSE	498.401	465.978	467.654
sgRNA0331	SPV_0868	prsA	0.102886	0.0990473	1	1	FALSE	434.61	330.757	370.219
sgRNA0332	SPV_0871,SPV_0872	ebsC,SPV_0872	-0.129793	0.166266	1	1	FALSE	448.615	141.753	120.132
sgRNA0333	SPV_0873	SPV_0873	0.464972	0.0945414	1	1	FALSE	542.504	610.277	810.123
sgRNA0334	SPV_0874,SPV_0875	glmU,SPV_0875	-0.156778	0.222137	1	1	FALSE	216.701	251.089	244.736
sgRNA0335	SPV_0878	orfX	-0.303069	0.209726	1	1	FALSE	57.4627	94.5019	71.5657
sgRNA0336	SPV_0885,SPV_0886	ccdA-2,SPV_0886	-0.0879408	0.113357	1	1	FALSE	420.137	374.507	366.285
sgRNA0337	SPV_0886	SPV_0886	-0.0779048	0.115771	1	1	FALSE	288.228	251.439	228.526
sgRNA0338	SPV_0887	yfnA	-0.044683	0.110641	1	1	FALSE	304.44	216.36	223.616
sgRNA0339	SPV_0888,SPV_2265	lmb,phtD	-0.081842	0.153937	1	1	FALSE	182.813	137.305	124.658
sgRNA0340	SPV_1034,SPV_1033	SPV_1034,SPV_1033	-0.0707335	0.107052	1	1	FALSE	508.626	471.147	428.1
sgRNA0341	SPV_1032,SPV_1031,SPV_1030	ung,mutX,pyrC	0.00670781	0.0957503	1	1	FALSE	339.778	344.02	353.604
sgRNA0342	SPV_1028	acoA	0.780716	0.143738	1	1	FALSE	184.587	298.024	469.643
sgRNA0343	SPV_1023	xerS	-0.125995	0.129624	1	1	FALSE	310.809	316.792	289.977
sgRNA0344	SPV_1020,SPV_1019	rnhB,rbgA	0.418088	0.120695	1	1	FALSE	149.515	332.964	462.974
sgRNA0345	SPV_1018	zmpA	-0.180824	0.100227	1	1	FALSE	484.053	440.234	378.302
sgRNA0346	SPV_1017,SPV_1016,SPV_1015	SPV_1017,rexA,rexB	-0.081713	0.104232	1	1	FALSE	347.728	324.383	316.603
sgRNA0347	SPV_1012	eno	3.59024	0.189541	1.62406e-42	2.43285e-39	TRUE	17.1302	140.778	1686.12
sgRNA0348	SPV_1010	SPV_1010	-0.120878	0.0964478	1	1	FALSE	678.729	675.099	603.998
sgRNA0349	SPV_1008,SPV_1007	glgA,glgD	0.0304206	0.120268	1	1	FALSE	338.095	285.164	311.868
sgRNA0350	SPV_1008,SPV_1007,SPV_1006,SPV_1005	glgA,glgD,glgC,glgB	-0.0611499	0.17531	1	1	FALSE	141.741	124.408	119.436
sgRNA0351	SPV_1004	gapN	-0.0667752	0.133162	1	1	FALSE	255.342	258.498	255.986
sgRNA0352	SPV_1002,SPV_1001	pulA,ligA	0.2098	0.10156	1	1	FALSE	295.486	354.15	403.93
sgRNA0353	SPV_1000	SPV_1000	-0.121028	0.0889224	1	1	FALSE	603.061	575.869	527.059
sgRNA0354	SPV_1000,SPV_0999,SPV_0998	SPV_1000,rggD,SPV_0998	-0.109437	0.117814	1	1	FALSE	340.277	378.446	326.754
sgRNA0355	SPV_0997	hlpA	-0.205844	0.202137	1	1	FALSE	120.39	86.2123	67.6575
sgRNA0356	SPV_0996	SPV_0996	0.607585	0.137987	1	1	FALSE	160.114	345.837	610.044
sgRNA0357	SPV_0995	SPV_0995	-0.0990422	0.084667	1	1	FALSE	517.575	465.978	443.335
sgRNA0358	SPV_0994	ribF	1.48654	0.193215	0.0117978	0.135947	FALSE	17.5252	89.5282	295.923
sgRNA0359	SPV_2270	srf-15	2.0079	0.280003	0.000318704	0.00422495	TRUE	28.5335	101.322	274.665
sgRNA0360	SPV_0988	SPV_0988	0.143304	0.108357	1	1	FALSE	405.388	407.115	430.993
sgRNA0361	SPV_0987	SPV_0987	-0.261513	0.0996004	1	1	FALSE	544.972	539.957	463.272
sgRNA0362	SPV_0985,SPV_0984,SPV_0983,SPV_0982	eutD,rluD3,ppnK,SPV_0982	1.05748	0.237829	0.809009	1	FALSE	14.1938	40.3162	88.3993
sgRNA0363	SPV_0981	SPV_0981	-0.15403	0.135691	1	1	FALSE	497.543	448.222	390.972
sgRNA0364	SPV_0980	prs2	1.71455	0.164346	1.37489e-05	0.000196151	TRUE	140.168	453.851	1371.48
sgRNA0365	SPV_0976,SPV_0974	rex,SPV_0974	-0.0753931	0.126091	1	1	FALSE	401.855	274.201	238.299
sgRNA0366	SPV_0975	radC	-0.0928405	0.127417	1	1	FALSE	310.548	286.166	278.507
sgRNA0367	SPV_0973	pcrA	-0.27065	0.145006	1	1	FALSE	163.073	184.19	157.347
sgRNA0368	SPV_0967	murA-1	-0.496824	0.303702	1	1	FALSE	198.404	79.5186	61.7616
sgRNA0369	SPV_0963	SPV_0963	1.12171	0.116924	0.297917	1	FALSE	54.3088	223.82	434.209
sgRNA0370	SPV_0960	lafB	0.589318	0.176642	1	1	FALSE	159.636	310.972	489.463
sgRNA0371	SPV_0959,SPV_0958,SPV_0957	SPV_0959,rpoD,dnaG	1.93709	0.224015	2.87489e-05	0.000406282	TRUE	30.5092	74.6595	304.691
sgRNA0372	SPV_0953,SPV_0952	ppc,ftsW	0.742902	0.34346	1	1	FALSE	195.985	24.3686	32.2395
sgRNA0373	SPV_0939	mutR2	-0.115941	0.084272	1	1	FALSE	471.17	440.193	398.498
sgRNA0374	SPV_2285,SPV_0931,SPV_0930	SPV_2285,pezT,pezA	-0.37432	0.123475	1	1	FALSE	256.204	296.769	235.538
sgRNA0375	SPV_2285,SPV_0931,SPV_0930,SPV_2286,SPV_2287,SPV_0928	SPV_2285,pezT,pezA,SPV_2286,SPV_2287,SPV_0928	-0.126046	0.101214	1	1	FALSE	298.087	284.335	257.656
sgRNA0376	SPV_2285,SPV_0931,SPV_0930,SPV_2286,SPV_2287,SPV_0927	SPV_2285,pezT,pezA,SPV_2286,SPV_2287,nplT	-0.193924	0.0983964	1	1	FALSE	495.862	550.078	489.826
sgRNA0377	SPV_0926	SPV_0926	-0.094214	0.0819036	1	1	FALSE	543.511	533.853	509.824
sgRNA0378	SPV_0923	SPV_0923	0.0670023	0.171061	1	1	FALSE	168.283	147.494	157.889
sgRNA0379	SPV_0922,SPV_0921	SPV_0922,ccrB	-0.199431	0.129614	1	1	FALSE	292.655	274.467	222.262
sgRNA0380	SPV_0919,SPV_2288,SPV_0918,SPV_0917,SPV_0916,SPV_0915	SPV_0919,SPV_2288,piaD,piaC,piaB,piaA	-0.141404	0.118145	1	1	FALSE	227.4	208.015	192.757
sgRNA0381	SPV_0914	rlmCD	-0.174161	0.0991141	1	1	FALSE	422.547	468.553	440.56
sgRNA0382	SPV_0913	SPV_0913	-0.263207	0.159577	1	1	FALSE	98.8335	101.186	79.5609
sgRNA0383	SPV_0904	tdk	1.33676	0.139305	0.015631	0.177389	FALSE	202.04	450.593	1286.08
sgRNA0384	SPV_0903	xylH	-0.112034	0.0997682	1	1	FALSE	388.802	392.886	355.224
sgRNA0385	SPV_0902	mnmE	0.412672	0.132365	1	1	FALSE	303.779	471.147	598.202
sgRNA0386	SPV_0901,SPV_0900	dapA,asd	-0.0848861	0.11669	1	1	FALSE	337.375	510.672	439.528
sgRNA0387	SPV_2292	srf-17	-0.0431375	0.0859046	1	1	FALSE	416.41	377.179	387.973
sgRNA0388	SPV_0899	tRNA-Thr-1	-0.101098	0.108488	1	1	FALSE	472.829	417.798	403.44
sgRNA0389	SPV_0898	queT	-0.161109	0.0962221	1	1	FALSE	679.5	679.659	606.12
sgRNA0390	SPV_0897	mesH	-0.288473	0.0991531	1	1	FALSE	712.756	556.522	468.003
sgRNA0391	SPV_0896	mscL	-0.0788581	0.0999544	1	1	FALSE	562.001	577.538	523.71
sgRNA0392	SPV_0895	hemH	0.0518057	0.127608	1	1	FALSE	199.351	203.383	219.923
sgRNA0393	SPV_0894	pepT	0.076142	0.110871	1	1	FALSE	346.592	300.085	298.817
sgRNA0394	SPV_0890	phtE	-0.232454	0.0972826	1	1	FALSE	615.898	604.999	540.485
sgRNA0395	SPV_1039,SPV_1040	ptsI,ptsH	4.37787	0.445142	3.24142e-14	8.37181e-13	TRUE	8.20757	72.085	1143.93
sgRNA0396	SPV_1041,SPV_1042,SPV_1043	nrdH,nrdE,nrdF	1.13267	0.220689	0.547719	1	FALSE	34.5553	56.7313	163.655
sgRNA0397	SPV_1043	nrdF	0.273111	0.135322	1	1	FALSE	188.647	336.03	397.318
sgRNA0398	SPV_1044	lacR	-0.110635	0.10878	1	1	FALSE	423.993	378.209	348.999
sgRNA0399	SPV_2301,SPV_1051,SPV_1052,SPV_1053	lacD,lacC,lacB,lacA	-0.240342	0.12998	1	1	FALSE	264.181	261.642	232.455
sgRNA0400	SPV_2304,SPV_2306	SPV_2304,SPV_2306	-0.0862954	0.116693	1	1	FALSE	278.932	255.291	244.765
sgRNA0401	SPV_1060	lepA	0.264742	0.126041	1	1	FALSE	252.963	271.937	331.47
sgRNA0402	SPV_1064,SPV_1065	SPV_1064,ispA	0.177893	0.115603	1	1	FALSE	471.635	503.558	553.505
sgRNA0403	SPV_1067	xseA	0.320961	0.174646	1	1	FALSE	225.453	250.581	311.134
sgRNA0404	SPV_1068	udk	0.311156	0.319824	1	1	FALSE	199.088	580.971	682.43
sgRNA0405	SPV_2309	SPV_2309	-0.0430008	0.112353	1	1	FALSE	371.426	320.427	328.204
sgRNA0406	SPV_1072	SPV_1072	0.0464171	0.15173	1	1	FALSE	120.75	125.019	124.227
sgRNA0407	SPV_2310,SPV_1074	SPV_2310,SPV_1074	-0.0729903	0.131605	1	1	FALSE	608.654	599.341	558.502
sgRNA0408	SPV_1075	nirC	-0.135825	0.115171	1	1	FALSE	440.594	435.991	370.191
sgRNA0409	SPV_1077	gyrA	-0.550218	0.213522	1	1	FALSE	204.925	309.204	197.464
sgRNA0410	SPV_1078	ldh	1.15862	0.169934	0.350612	1	FALSE	147.8	587.412	1217.97
sgRNA0411	SPV_1079	SPV_1079	-0.0754966	0.148008	1	1	FALSE	216.753	234.783	213.586
sgRNA0412	SPV_1079,SPV_1080	SPV_1079,SPV_1080	-0.195272	0.0843323	1	1	FALSE	512.035	520.719	466.074
sgRNA0413	SPV_1079,SPV_1080,SPV_1081,SPV_1082	SPV_1079,SPV_1080,relE2,relB2	0.222236	0.113583	1	1	FALSE	259.82	243.686	284.196
sgRNA0414	SPV_1083,SPV_1084,SPV_1085	vicX,vicK,vicR	-0.810152	0.412302	1	1	FALSE	285.913	90.3571	34.7529
sgRNA0415	SPV_1083,SPV_1084,SPV_1085,SPV_1086	vicX,vicK,vicR,mutY	0.129862	0.148302	1	1	FALSE	221.399	213.268	237.636
sgRNA0416	SPV_1087	fhs	0.417098	0.134076	1	1	FALSE	121.575	351.944	471.574
sgRNA0417	SPV_1088,SPV_1089,SPV_1090	coaB,coaC,panT	-0.189104	0.120251	1	1	FALSE	447.36	590.223	488.952
sgRNA0418	SPV_1093	niaR	0.0813769	0.0868462	1	1	FALSE	504.865	522.138	540.869
sgRNA0419	SPV_1091,SPV_1093	niaX,niaR	0.0367498	0.12136	1	1	FALSE	304.237	302.567	324.974
sgRNA0420	SPV_1096	uvrB	-0.117467	0.138204	1	1	FALSE	302.619	280.505	276.601
sgRNA0421	SPV_1097	SPV_1097	-0.0688264	0.111415	1	1	FALSE	317.134	307.22	283.912
sgRNA0422	SPV_1098,SPV_1099	glnHP5,glnQ5	2.68873	0.298059	1.4638e-08	2.61045e-07	TRUE	77.961	468.559	2535.39
sgRNA0423	SPV_1100	zwf	0.696027	0.198191	1	1	FALSE	201.756	448.47	751.869
sgRNA0424	SPV_1105	rnc	-0.748176	0.126356	1	1	FALSE	268.237	306.769	193.873
sgRNA0425	SPV_1106,SPV_1107	tRNA-Arg-1,guaC	-0.123188	0.118051	1	1	FALSE	341.291	239.838	222.301
sgRNA0426	SPV_1118	cutC	-0.171012	0.122997	1	1	FALSE	571.114	523.284	479.917
sgRNA0427	SPV_1118,SPV_1119	cutC,SPV_1119	-0.032612	0.104569	1	1	FALSE	438.352	402.877	378.568
sgRNA0428	SPV_1120	topA	-0.26165	0.224605	1	1	FALSE	332.591	204.743	167.554
sgRNA0429	SPV_1121	SPV_1121	-0.172943	0.128612	1	1	FALSE	341.215	341.16	282.843
sgRNA0430	SPV_1122	dprA	0.0528523	0.130655	1	1	FALSE	213.439	223.716	209.925
sgRNA0431	SPV_1123,SPV_1124,SPV_1125,SPV_1126,SPV_1127	licC,licB,licA,tarJ,tarI	0.0112289	0.219308	1	1	FALSE	45.2456	174.083	161.034
sgRNA0432	SPV_1128	tacF	0.520589	0.442518	1	1	FALSE	19.0035	173.346	190.51
sgRNA0433	SPV_1131,SPV_1132,SPV_1133,SPV_1134	carB,carA,pyrB,pyrR	-0.0891782	0.102079	1	1	FALSE	639.043	658.198	634.663
sgRNA0434	SPV_1136	SPV_1136	0.0030987	0.110374	1	1	FALSE	347.132	366.652	359.993
sgRNA0435	SPV_2315,SPV_2316	SPV_2315,SPV_2316	0.0444834	0.122898	1	1	FALSE	450.868	460.075	474.276
sgRNA0436	SPV_2317	srf-19	-0.0798597	0.131141	1	1	FALSE	161.803	170.58	156.599
sgRNA0437	SPV_1138,SPV_1139	htpX,lemA	-0.21512	0.12348	1	1	FALSE	323.4	253.947	214.532
sgRNA0438	SPV_1140	rsmG	-0.174968	0.125732	1	1	FALSE	387.978	319.376	277.178
sgRNA0439	SPV_1141	uraA	-0.171671	0.119351	1	1	FALSE	489.555	471.127	427.782
sgRNA0440	SPV_1143	SPV_1143	1.35885	0.174502	0.0397395	0.431375	FALSE	25.3838	158.103	417.308
sgRNA0441	SPV_1144	SPV_1144	-0.0116942	0.0869521	1	1	FALSE	663.144	611.007	613.725
sgRNA0442	SPV_1145,SPV_1146	SPV_1145,yidA	-0.221573	0.116661	1	1	FALSE	335.779	348.165	302.649
sgRNA0443	SPV_1148	rplS	2.28519	0.258798	6.83479e-07	1.12511e-05	TRUE	21.8759	63.0348	262.784
sgRNA0444	SPV_1149,SPV_1150,SPV_1151	crcB1,crcB2,SPV_1151	0.0580812	0.0988311	1	1	FALSE	550.165	511.741	548.581
sgRNA0445	SPV_1152	fld	0.773397	0.130052	1	1	FALSE	290.883	719.134	1249.93
sgRNA0446	SPV_1153	pde2	0.325397	0.107674	1	1	FALSE	487.133	651.384	771.838
sgRNA0447	SPV_1154	rpmE2	2.60521	0.200279	1.10257e-15	3.11632e-14	TRUE	57.4572	263.696	1349.24
sgRNA0448	SPV_1158	gdhA	0.424507	0.21526	1	1	FALSE	212.216	440.316	595.445
sgRNA0449	SPV_1180,SPV_2327,SPV_1182,SPV_2328,SPV_2329,SPV_1185	SPV_1180,SPV_2327,SPV_1182,SPV_2328,SPV_2329,SPV_1185	-0.0335411	0.133592	1	1	FALSE	204.2	192.095	190.696
sgRNA0450	SPV_2330	srf-20	3.33771	0.402991	6.59638e-09	1.20505e-07	TRUE	11.3891	38.4767	355.435
sgRNA0451	SPV_1190	trzA	0.0140439	0.127916	1	1	FALSE	400.178	283.506	285.426
sgRNA0452	SPV_1193	msrAB1	-0.182591	0.140686	1	1	FALSE	221.151	169.057	164.246
sgRNA0453	SPV_1193,SPV_2331,SPV_1194,SPV_1195	msrAB1,SPV_2331,thrB,hom	-0.153706	0.149312	1	1	FALSE	325.457	342.443	318.683
sgRNA0454	SPV_1196	mecA	0.526801	0.112061	1	1	FALSE	496.564	773.383	1095.75
sgRNA0455	SPV_1197,SPV_1198,SPV_1199,SPV_1200,SPV_1201	tarQ,tarP,cps23FU,SPV_1200,licD3	-1.05337	0.318655	0.86699	1	FALSE	139.495	109.26	45.063
sgRNA0456	SPV_1202,SPV_1203,SPV_1204,SPV_1205	psr,pheA,aroK,aroA	-1.11253	0.188995	0.551557	1	FALSE	416.825	264.312	111.648
sgRNA0457	SPV_1212	ywbD	-0.358986	0.1378	1	1	FALSE	339.184	404.191	323.57
sgRNA0458	SPV_1213,SPV_1214	SPV_1213,SPV_1214	0.122414	0.122428	1	1	FALSE	323.506	282.214	313.36
sgRNA0459	SPV_1215	amy	-0.0292047	0.101361	1	1	FALSE	943.803	898.024	865.567
sgRNA0460	SPV_1216,SPV_1217	alaS,SPV_1217	3.25639	0.208337	2.46848e-27	2.05433e-25	TRUE	29.6164	173.346	1581.32
sgRNA0461	SPV_1218,SPV_1219,SPV_1220,SPV_1221,SPV_1222	potD,potC,potB,potA,murB	2.87965	1.06613	0.0778899	0.804683	FALSE	0	0.790514	5.94145
sgRNA0462	SPV_1224	budA	-0.296415	0.131929	1	1	FALSE	291.181	290.119	232.306
sgRNA0463	SPV_1226	SPV_1226	-0.10338	0.138951	1	1	FALSE	256.53	217.113	201.385
sgRNA0464	SPV_1234,SPV_1235,SPV_1236	SPV_1234,SPV_1235,spxA1	-0.256343	0.133148	1	1	FALSE	582.126	504.839	413.927
sgRNA0465	SPV_1238,SPV_1239,SPV_1240	nagD,SPV_1239,hemN	-0.106567	0.120647	1	1	FALSE	753.882	770.817	759.684
sgRNA0466	SPV_1243,SPV_1244	lgt,hprK	0.109676	0.142624	1	1	FALSE	247.135	250.581	275.631
sgRNA0467	SPV_1245	rpsU	-0.35829	0.251032	1	1	FALSE	145.92	70.3558	52.8662
sgRNA0468	SPV_1246	nagB	0.183672	0.109765	1	1	FALSE	226.596	241.633	268.408
sgRNA0469	SPV_1247	queA	-0.0206191	0.0979652	1	1	FALSE	631.935	638.736	600.168
sgRNA0470	SPV_1249,SPV_1250,SPV_1251	SPV_1249,nadE,pncB	0.428781	0.116063	1	1	FALSE	290.372	457.708	583.253
sgRNA0471	SPV_1258	SPV_1258	-0.0825138	0.103162	1	1	FALSE	495.508	503.558	476.26
sgRNA0472	SPV_1259,SPV_1260,SPV_2335	SPV_1259,SPV_1260,SPV_2335	0.0929128	0.120512	1	1	FALSE	380.21	358.709	382.057
sgRNA0473	SPV_1262	SPV_1262	0.0185301	0.0912423	1	1	FALSE	464.228	457.002	467.502
sgRNA0474	SPV_1273	SPV_1273	-0.0245712	0.0966353	1	1	FALSE	641.305	590.514	548.762
sgRNA0475	SPV_1274	guaA	-0.140406	0.124448	1	1	FALSE	360.873	429.404	394.153
sgRNA0476	SPV_1278	cppA	0.29918	0.156362	1	1	FALSE	186.127	179.056	210.09
sgRNA0477	SPV_1280,SPV_2338	SPV_1280,capA	-0.1677	0.127205	1	1	FALSE	339.496	361.265	303.501
sgRNA0478	SPV_1285	def1	0.275638	0.129178	1	1	FALSE	402.143	299.256	399.191
sgRNA0479	SPV_1286	trmH	-0.114967	0.0904247	1	1	FALSE	885.688	756.035	691.15
sgRNA0480	SPV_1287	trxB	0.462664	0.127247	1	1	FALSE	301.77	495.874	667.549
sgRNA0481	SPV_1288	SPV_1288	0.133253	0.272555	1	1	FALSE	167.68	30.6717	39.4092
sgRNA0482	SPV_1289,SPV_1290	SPV_1289,SPV_1290	0.431763	0.125139	1	1	FALSE	180.662	237.154	314.307
sgRNA0483	SPV_1291,SPV_1292,SPV_1293	SPV_1291,ogt,SPV_1293	-0.0242517	0.118994	1	1	FALSE	296.912	321.922	299.595
sgRNA0484	SPV_1294,SPV_1295	SPV_1294,SPV_1295	-0.0916904	0.107622	1	1	FALSE	558.27	493.785	456.346
sgRNA0485	SPV_1298	nox	-0.436681	0.135084	1	1	FALSE	877.817	483.141	342.584
sgRNA0486	SPV_1300,SPV_1301,SPV_1302	apbE,SPV_1301,SPV_1302	-0.00770615	0.150521	1	1	FALSE	208.866	189.104	175.619
sgRNA0487	SPV_1303,SPV_1304,SPV_1305,SPV_2339,SPV_1307	SPV_1303,glyS,glyQ,SPV_2339,SPV_1307	3.04746	0.220024	1.33176e-20	5.54162e-19	TRUE	21.1375	114.513	868.427
sgRNA0488	SPV_1308	SPV_1308	0.249914	0.105389	1	1	FALSE	218.287	225.73	261.29
sgRNA0489	SPV_1308,SPV_1309	SPV_1308,pgdA	0.636965	0.109056	1	1	FALSE	203.426	383.399	602.094
sgRNA0490	SPV_1308,SPV_1309,SPV_2340	SPV_1308,pgdA,SPV_2340	-0.124243	0.106991	1	1	FALSE	593.248	610.277	535.967
sgRNA0491	SPV_1311	mocA	-0.133795	0.142578	1	1	FALSE	263.847	244.785	245.364
sgRNA0492	SPV_1318	tuf	3.19611	0.219679	1.57245e-23	8.41263e-22	TRUE	43.2807	171.245	1381.76
sgRNA0493	SPV_1320	SPV_1320	-0.318935	0.142828	1	1	FALSE	639.019	314.625	263.674
sgRNA0494	SPV_1326	pgm	0.298292	0.141231	1	1	FALSE	434.192	592.985	669.917
sgRNA0495	SPV_1327	bta	0.22476	0.178869	1	1	FALSE	1061.36	153.358	189.949
sgRNA0496	SPV_1328,SPV_1329,SPV_1330	glnH6,glnQ6,glnP6	-0.181195	0.115782	1	1	FALSE	410.243	362.056	327.896
sgRNA0497	SPV_1331,SPV_1332	SPV_1331,SPV_1332	0.0802091	0.136023	1	1	FALSE	223.7	162.191	190.087
sgRNA0498	SPV_1333	SPV_1333	0.0405946	0.096915	1	1	FALSE	562.472	530.537	535.847
sgRNA0499	SPV_1334,SPV_1335,SPV_1336,SPV_1337,SPV_1338,SPV_1339,SPV_1340,SPV_1341	atpC,atpD,atpG,atpA,atpH,atpF,atpB,atpE	0.929789	0.155637	1	1	FALSE	82.3385	239.838	459.016
sgRNA0500	SPV_1345,SPV_1346	greA,mltG	0.272921	0.126961	1	1	FALSE	617.093	335.135	376.894
sgRNA0501	SPV_1350	SPV_1350	2.53931	0.466772	0.000974524	0.0121653	TRUE	0.935609	5.13023	31.9328
sgRNA0502	SPV_1351	snf	-0.100585	0.0801101	1	1	FALSE	770.567	645.85	573.593
sgRNA0503	SPV_1352,SPV_1353	patB2,metB	0.0743881	0.141827	1	1	FALSE	208.391	216.42	215.361
sgRNA0504	SPV_1357	aliB	0.375085	0.187274	1	1	FALSE	216.19	493.234	622.315
sgRNA0505	SPV_1358	ytgP	0.621756	0.252926	1	1	FALSE	34.3504	358.248	459.94
sgRNA0506	SPV_1359	murE	1.13344	0.493844	0.787003	1	FALSE	3.89921	6.63171	13.9188
sgRNA0507	SPV_1360	SPV_1360	0.127856	0.114509	1	1	FALSE	290.066	286.808	311.736
sgRNA0508	SPV_1363	ppaC	3.21867	0.18707	1.90844e-32	3.17649e-30	TRUE	43.6072	248.987	2175.12
sgRNA0509	SPV_1364,SPV_1365	SPV_1364,SPV_1365	-0.24725	0.117337	1	1	FALSE	686.915	477.471	386.007
sgRNA0510	SPV_1364,SPV_1365,SPV_1366,SPV_1367	SPV_1364,SPV_1365,SPV_1366,SPV_1367	-0.128645	0.192219	1	1	FALSE	433.413	121.843	110.932
sgRNA0511	SPV_1368,SPV_1369	rpsR,ssbA	1.09963	0.145114	0.492357	1	FALSE	66.207	295.213	519.333
sgRNA0512	SPV_1370	rpsF	1.30978	0.248866	0.213224	1	FALSE	31.6332	118.716	211.767
sgRNA0513	SPV_1371	asnC	3.56278	0.224073	2.72344e-30	2.71981e-28	TRUE	24.9921	134.474	1387.01
sgRNA0514	SPV_1374	SPV_1374	3.56813	0.248137	4.19959e-25	2.62124e-23	TRUE	6.44959	72.49	664.256
sgRNA0515	SPV_1375	SPV_1375	-0.0471281	0.0891001	1	1	FALSE	551.303	556.807	538.036
sgRNA0516	SPV_1378	yaaA	0.0815119	0.115484	1	1	FALSE	388.278	393.676	409.624
sgRNA0517	SPV_1379	SPV_1379	0.0838292	0.0880508	1	1	FALSE	549.552	500.076	537.828
sgRNA0518	SPV_1379,SPV_1380,SPV_1381	SPV_1379,SPV_1380,def2	-0.0782346	0.0913675	1	1	FALSE	536.462	522.138	481.569
sgRNA0519	SPV_1382,SPV_1383	SPV_1382,pacL	-0.0661601	0.126942	1	1	FALSE	329.437	153.385	150.09
sgRNA0520	SPV_1384	mntE	-0.149964	0.103615	1	1	FALSE	279.708	256.917	231.479
sgRNA0521	SPV_1385,SPV_1386,SPV_1387,SPV_1388,SPV_1389	SPV_1385,cca,dapB,SPV_1388,SPV_1389	1.3557	0.167321	0.0335148	0.369155	FALSE	113.376	434.94	1013.11
sgRNA0522	SPV_1390,SPV_1391,SPV_1392	glmM,SPV_1391,disA	-0.140705	0.314262	1	1	FALSE	150.617	60.0709	52.0609
sgRNA0523	SPV_1394,SPV_1395,SPV_1396	SPV_1394,SPV_1395,SPV_1396	0.289799	0.0914662	1	1	FALSE	493.947	691.356	820.51
sgRNA0524	SPV_1401	folA	0.730125	0.194649	1	1	FALSE	22.2341	76.9535	130.187
sgRNA0525	SPV_1402	dpr	0.000713619	0.113157	1	1	FALSE	532.255	723.686	711.102
sgRNA0526	SPV_1403,SPV_1404	lytC,tpiA	2.31191	0.168126	6.03759e-15	1.64442e-13	TRUE	43.3152	397.119	1820.54
sgRNA0527	SPV_1405,SPV_1406	dnaD,metA	1.08319	0.236329	0.724828	1	FALSE	31.3917	135.951	285.841
sgRNA0528	SPV_1407	apt	-0.05034	0.110866	1	1	FALSE	241.745	243.735	238.655
sgRNA0529	SPV_1408	SPV_1408	-0.235894	0.0930234	1	1	FALSE	570.132	545.787	468.178
sgRNA0530	SPV_1409	msmK	-0.102976	0.102297	1	1	FALSE	440.539	411.701	371.726
sgRNA0531	SPV_1410	tRNA-Leu-1	0.0301761	0.123357	1	1	FALSE	342.374	349.843	355.685
sgRNA0532	SPV_1411,SPV_1412	SPV_1411,codY	-0.38074	0.121863	1	1	FALSE	963.692	499.605	406.864
sgRNA0533	SPV_1413	cshA	-0.311056	0.106075	1	1	FALSE	857.315	746.449	590.92
sgRNA0534	SPV_1415	merA	-0.178978	0.105038	1	1	FALSE	589.149	572.021	504.193
sgRNA0535	SPV_1416,SPV_1417	murT,gatD	0.425062	0.258363	1	1	FALSE	11.3202	101.906	126.442
sgRNA0536	SPV_1418,SPV_1419	pepQ,SPV_1419	-0.203007	0.100393	1	1	FALSE	457.827	452.174	374.632
sgRNA0537	SPV_1420,SPV_1421,SPV_2360	SPV_1420,SPV_1421,SPV_2360	0.0813109	0.0970001	1	1	FALSE	849.892	747.453	789.381
sgRNA0538	SPV_1422,SPV_1423,SPV_1424	pdxU2,pdxK,truA	0.156161	0.17361	1	1	FALSE	75.3193	233.768	261.239
sgRNA0539	SPV_1427	phnA	-0.125297	0.142521	1	1	FALSE	164.062	146.745	126.545
sgRNA0540	SPV_1430	fer	0.54663	0.19781	1	1	FALSE	166.747	504.01	686.123
sgRNA0541	SPV_1429	SPV_1429	1.16685	0.23594	0.479453	1	FALSE	20.9612	75.4358	183.852
sgRNA0542	SPV_1431,SPV_1432	gtrB,galE-1	0.0200502	0.228223	1	1	FALSE	97.3684	98.7545	112.265
sgRNA0543	SPV_1435	SPV_1435	0.697897	0.15492	1	1	FALSE	77.5153	237.273	369.001
sgRNA0544	SPV_1436	ctpE	-0.383157	0.266133	1	1	FALSE	163.766	122.918	78.1558
sgRNA0545	SPV_1437	plsC	1.34012	0.230147	0.139447	1	FALSE	116.707	467.508	969.454
sgRNA0546	SPV_1438	cadD	-0.0030345	0.121654	1	1	FALSE	322.006	299.605	295.025
sgRNA0547	SPV_1439	rpsO	0.100935	0.10369	1	1	FALSE	423.784	449.012	486.013
sgRNA0548	SPV_2364	SPV_2364	-0.119569	0.185507	1	1	FALSE	197.446	165.793	140.826
sgRNA0549	SPV_2365,SPV_1444,SPV_1442	SPV_2365,thrS,SPV_1442	3.61982	0.309561	2.60542e-17	8.67316e-16	TRUE	29.5161	121.867	1130.66
sgRNA0550	SPV_1445,SPV_1446	SPV_1445,SPV_1446	-0.0125294	0.10779	1	1	FALSE	198.283	196.518	202.375
sgRNA0551	SPV_1447	SPV_1447	-0.131205	0.105942	1	1	FALSE	543.545	558.722	524.624
sgRNA0552	SPV_2366	SPV_2366	-0.12131	0.123605	1	1	FALSE	349.949	320.092	301.151
sgRNA0553	SPV_1448	SPV_1448	0.0835615	0.108559	1	1	FALSE	313.795	298.024	307.612
sgRNA0554	SPV_1449	SPV_1449	-0.0545909	0.106722	1	1	FALSE	492.612	405.364	395.436
sgRNA0555	SPV_1450,SPV_1451	mntR,SPV_1451	0.4424	0.127426	1	1	FALSE	256.183	537.55	741.634
sgRNA0556	SPV_2369,SPV_2370	SPV_2369,SPV_2370	-0.0847329	0.0953176	1	1	FALSE	315.581	325.241	314.595
sgRNA0557	SPV_1458	relA	0.420391	0.103011	1	1	FALSE	285.096	421.354	541.832
sgRNA0558	SPV_1459	SPV_1459	0.144772	0.102458	1	1	FALSE	364.695	325.241	351.094
sgRNA0559	SPV_1460	pepO	0.0944407	0.0916719	1	1	FALSE	410	406.193	448.192
sgRNA0560	SPV_1461,SPV_1462,SPV_1463	psaB,psaC,psaA	0.178651	0.116219	1	1	FALSE	310.884	338.971	412.163
sgRNA0561	SPV_1464	psaD	0.0620202	0.088917	1	1	FALSE	485.252	456.917	464.246
sgRNA0562	SPV_1466	SPV_1466	-0.103218	0.108445	1	1	FALSE	404.026	397.074	350.623
sgRNA0563	SPV_1467	SPV_1467	-0.0846817	0.111535	1	1	FALSE	481.046	464.286	441.486
sgRNA0564	SPV_1468	gpmA	2.81639	0.167259	1.79199e-27	1.57906e-25	TRUE	42.5098	312.022	2288.02
sgRNA0565	SPV_1479,SPV_1480	ftsZ,ftsA	0.143828	0.43969	1	1	FALSE	68.8532	8.28964	6.00157
sgRNA0566	SPV_1481	SPV_1481	-0.257363	0.124475	1	1	FALSE	327.385	266.098	209.638
sgRNA0567	SPV_1484	ddl	1.87632	0.539858	0.104538	1	FALSE	0.387369	9.45522	27.8532
sgRNA0568	SPV_1486	pbp2b	1.22081	0.187259	0.23832	1	FALSE	75.4295	290.966	637.877
sgRNA0569	SPV_1487	nanR	-0.285645	0.0867129	1	1	FALSE	740.121	650.482	546.631
sgRNA0570	SPV_1504,SPV_1505	nanA,SPV_1505	0.10942	0.0882622	1	1	FALSE	475.429	442.688	453.348
sgRNA0571	SPV_1506	axe1	0.069549	0.0966187	1	1	FALSE	341.982	357.834	385.465
sgRNA0572	SPV_2378	srf-21	-0.0919883	0.110878	1	1	FALSE	374.842	380.163	357.81
sgRNA0573	SPV_1512	secA	-1.06743	0.33034	0.838255	1	FALSE	166.77	158.638	54.1844
sgRNA0574	SPV_1518	SPV_1518	-0.378293	0.13802	1	1	FALSE	283.528	280.505	222.469
sgRNA0575	SPV_2382	SPV_2382	-0.131328	0.107889	1	1	FALSE	274.063	260.87	259.003
sgRNA0576	SPV_1522,SPV_1523	dnaB,nrdR	1.99843	0.215611	3.64416e-06	5.74627e-05	TRUE	6.59101	41.0419	169.194
sgRNA0577	SPV_1524,SPV_1525,SPV_1526	gntR,SPV_1525,SPV_1526	-0.130693	0.135084	1	1	FALSE	262.956	281.423	258.373
sgRNA0578	SPV_2383,SPV_1527,SPV_1528	srf-22,qsrB,qsrA	-0.0425097	0.0968705	1	1	FALSE	436.429	407.85	416.781
sgRNA0579	SPV_1530	SPV_1530	0.0694145	0.0947181	1	1	FALSE	385.645	441.2	452.59
sgRNA0580	SPV_1531	scrK	0.0685932	0.123934	1	1	FALSE	432.12	465.12	493.987
sgRNA0581	SPV_1532	scrA	0.545095	0.155804	1	1	FALSE	303.547	551.794	865.341
sgRNA0582	SPV_1534,SPV_1535	scrB,scrR	0.931227	0.156023	1	1	FALSE	161.577	513.734	942.081
sgRNA0583	SPV_1536,SPV_1537	mvaA,mvaS	-0.0261328	0.144578	1	1	FALSE	216.615	238.735	212.379
sgRNA0584	SPV_1538	SPV_1538	-0.176762	0.127787	1	1	FALSE	156.346	157.503	142.949
sgRNA0585	SPV_1541	SPV_1541	-0.167103	0.0964805	1	1	FALSE	480.034	419.638	383.738
sgRNA0586	SPV_1542,SPV_1543	stkP,phpP	0.148821	0.181737	1	1	FALSE	316.973	706.278	682.382
sgRNA0587	SPV_1547,SPV_1548	rpoZ,gmk	2.8956	0.225216	3.86849e-17	1.23298e-15	TRUE	18.7775	126.07	886.957
sgRNA0588	SPV_1549	rny	0.860737	0.19387	1	1	FALSE	352.249	624.045	1130.55
sgRNA0589	SPV_1550,SPV_1551	yoeB,yefM	0.398383	0.114342	1	1	FALSE	209.768	287.482	378.584
sgRNA0590	SPV_1555,SPV_1556,SPV_1557,SPV_1558,SPV_1559,SPV_1560,SPV_1561	SPV_1555,yqeK,nadD,SPV_1558,yqeH,SPV_1560,corA2	0.791708	0.160078	1	1	FALSE	64.0613	208.015	348.564
sgRNA0591	SPV_1555,SPV_1556,SPV_1557,SPV_1558,SPV_1559,SPV_1560,SPV_1561,SPV_1562	SPV_1555,yqeK,nadD,SPV_1558,yqeH,SPV_1560,corA2,SPV_1562	-0.0777502	0.13158	1	1	FALSE	247.169	254.492	249.074
sgRNA0592	SPV_2388	SPV_2388	0.0447619	0.105856	1	1	FALSE	449.706	529.492	536.164
sgRNA0593	SPV_1565	SPV_1565	-0.151094	0.146078	1	1	FALSE	224.493	203.953	197.04
sgRNA0594	SPV_1566,SPV_1567	SPV_1566,trxA	0.0466905	0.112164	1	1	FALSE	467.053	435.206	446.911
sgRNA0595	SPV_1569	aqpZ	0.0246912	0.0905002	1	1	FALSE	616.588	606.324	606.437
sgRNA0596	SPV_1576	SPV_1576	-0.0404592	0.0926536	1	1	FALSE	515.349	536.34	522.902
sgRNA0597	SPV_2391	hicA	-0.0292879	0.103252	1	1	FALSE	488.9	467.194	443.002
sgRNA0598	SPV_1578,SPV_1579	SPV_1578,SPV_1579	0.0741618	0.117399	1	1	FALSE	243.709	241.142	260.518
sgRNA0599	SPV_1580,SPV_2392,SPV_1581	SPV_1580,ssrS,tRNA-Lys-1	-0.156575	0.0883307	1	1	FALSE	684.039	759.684	645.64
sgRNA0600	SPV_2392,SPV_1581	ssrS,tRNA-Lys-1	0.0727486	0.159495	1	1	FALSE	118.223	137.234	151.925
sgRNA0601	SPV_1582,SPV_1583,SPV_1584,SPV_1585	sacA,SPV_1583,SPV_1584,SPV_1585	-0.0603328	0.0885954	1	1	FALSE	678.605	656.127	620.447
sgRNA0602	SPV_1586	SPV_1586	0.0198171	0.0997105	1	1	FALSE	377.502	423.601	421.925
sgRNA0603	SPV_2393,SPV_1588,SPV_1589,SPV_1590,SPV_1591	SPV_2393,SPV_1588,SPV_1589,gls24,SPV_1591	0.0200598	0.120934	1	1	FALSE	392.921	408.696	396.162
sgRNA0604	SPV_1592	SPV_1592	-0.103313	0.104516	1	1	FALSE	579.679	568.364	533.978
sgRNA0605	SPV_1593	cclA	-0.0140578	0.111321	1	1	FALSE	287.97	286.01	282.164
sgRNA0606	SPV_1594,SPV_1595	SPV_1594,SPV_1595	0.789285	0.113616	1	1	FALSE	223.721	319.98	554.148
sgRNA0607	SPV_1596,SPV_1597,SPV_1598,SPV_1599,SPV_1600,SPV_1601,SPV_1602	trpA,trpB,trpF,trpC,trpD,trpG,trpE	-0.0919825	0.122626	1	1	FALSE	334.757	334.388	319.705
sgRNA0608	SPV_1603	SPV_1603	-0.238399	0.0999156	1	1	FALSE	551.916	539.656	468.897
sgRNA0609	SPV_1606,SPV_1607,SPV_1608,SPV_1609,SPV_1610	mgtC,sfuB,SPV_1608,SPV_1609,SPV_1610	-0.230099	0.111984	1	1	FALSE	492.408	446.497	387.972
sgRNA0610	SPV_1606,SPV_1607,SPV_1608,SPV_1609,SPV_1610,SPV_1612,SPV_1613,SPV_1614,SPV_2396,SPV_1617	mgtC,sfuB,SPV_1608,SPV_1609,SPV_1610,galE-2,galT-1,phoU3,SPV_2396,pfbA	-0.209257	0.120646	1	1	FALSE	559.22	543.212	465.606
sgRNA0611	SPV_1619,SPV_1620	aatB,SPV_1620	-1.83266	0.185884	7.48337e-06	0.000114389	TRUE	783.377	431.788	83.1819
sgRNA0612	SPV_2397,SPV_2398,SPV_1625	SPV_2397,SPV_2398,SPV_1625	0.269887	0.219701	1	1	FALSE	395.21	379.259	465.855
sgRNA0613	SPV_1626	exoA	-0.0547408	0.110249	1	1	FALSE	540.999	541.496	531.122
sgRNA0614	SPV_1628,SPV_1629	xpt,pbuX	-0.224953	0.0989311	1	1	FALSE	427.747	384.98	339.5
sgRNA0615	SPV_1630,SPV_1631	dpnD,dpnC	-0.0144879	0.111885	1	1	FALSE	360.8	392.1	372.207
sgRNA0616	SPV_1632	paaI	-0.00435947	0.133578	1	1	FALSE	235.751	222.262	236.61
sgRNA0617	SPV_1635	galR	-0.024542	0.0884744	1	1	FALSE	451.435	423.929	416.626
sgRNA0618	SPV_1636,SPV_1637	adhB,nmlR	-0.1376	0.102928	1	1	FALSE	331.746	321.638	295.025
sgRNA0619	SPV_1636,SPV_1637,SPV_1638	adhB,nmlR,czcD	0.0255453	0.139515	1	1	FALSE	312.695	301.186	319.868
sgRNA0620	SPV_1642,SPV_1643,SPV_1644,SPV_1645	proWX,proV,SPV_1644,SPV_1645	-0.0655694	0.0901005	1	1	FALSE	313.518	309.794	279.572
sgRNA0621	SPV_1646,SPV_1647	SPV_1646,pepA	-0.204689	0.0991728	1	1	FALSE	438.582	367.231	330.931
sgRNA0622	SPV_1649,SPV_1650,SPV_1651,SPV_1652	piuB,piuC,piuD,piuA	-0.190105	0.109399	1	1	FALSE	286.618	271.902	233.573
sgRNA0623	SPV_1658,SPV_1659,SPV_1660,SPV_1661	SPV_1658,SPV_1659,rdgB,murI	-0.432112	0.204273	1	1	FALSE	163.191	181.929	128.52
sgRNA0624	SPV_1662	SPV_1662	-0.834481	0.132044	1	1	FALSE	429.266	280.88	170.915
sgRNA0625	SPV_1663	treC	-0.0870779	0.118159	1	1	FALSE	407.765	324.629	318.621
sgRNA0626	SPV_1665	treR	-0.133821	0.11747	1	1	FALSE	285.601	253.156	254.784
sgRNA0627	SPV_1671	amiA	2.14211	0.173301	4.38799e-11	9.12947e-10	TRUE	48.534	301.516	1493.41
sgRNA0628	SPV_1672	tacL	0.550066	0.42207	1	1	FALSE	79.4435	23.1702	35.008
sgRNA0629	SPV_1679,SPV_1680	msmR,birA	-0.0946868	0.102673	1	1	FALSE	286.516	280.617	272.481
sgRNA0630	SPV_1704	rumA-2	-0.0530984	0.113045	1	1	FALSE	312.084	273.518	278.727
sgRNA0631	SPV_1705	recX	-0.082467	0.0852678	1	1	FALSE	497.478	482.457	460.783
sgRNA0632	SPV_1706	SPV_1706	-0.208201	0.218233	1	1	FALSE	317.445	72.9432	69.7208
sgRNA0633	SPV_1709,SPV_1710	groEL,groES	0.135235	0.111451	1	1	FALSE	496.052	591.269	713.066
sgRNA0634	SPV_1711	ssbB	0.0215913	0.136269	1	1	FALSE	470.706	435.573	429.035
sgRNA0635	SPV_1715	SPV_1715	0.137969	0.0980455	1	1	FALSE	312.643	305.503	335.654
sgRNA0636	SPV_1716,SPV_1717,SPV_1718	SPV_1716,SPV_1717,SPV_1718	-0.0798288	0.141013	1	1	FALSE	283.771	260.021	265.923
sgRNA0637	SPV_1719,SPV_1720	SPV_1719,SPV_1720	-0.218462	0.100344	1	1	FALSE	712.877	657.952	570.162
sgRNA0638	SPV_1725	yeeN	0.238325	0.115406	1	1	FALSE	451.77	583.4	646.854
sgRNA0639	SPV_1726,SPV_1727,SPV_1728,SPV_1729	ply,SPV_1727,SPV_1728,SPV_1729	-0.08119	0.117404	1	1	FALSE	529.935	495.067	493.5
sgRNA0640	SPV_1737	lytA	-0.0827978	0.155916	1	1	FALSE	407.698	285.766	248.722
sgRNA0641	SPV_1737,SPV_1738	lytA,dinF	-0.320289	0.149164	1	1	FALSE	372.069	336.397	260.163
sgRNA0642	SPV_1737,SPV_1738,SPV_1739	lytA,dinF,recA	-0.182621	0.104512	1	1	FALSE	550.289	500.694	470.273
sgRNA0643	SPV_1737,SPV_1738,SPV_1739,SPV_1740	lytA,dinF,recA,cinA	-0.111677	0.119656	1	1	FALSE	452.202	387.886	352.18
sgRNA0644	SPV_1741,SPV_1742,SPV_1743	lytR,SPV_1742,tsaE	1.42931	0.151397	0.00457343	0.054373	FALSE	296.707	149.182	380.028
sgRNA0645	SPV_1741,SPV_1742,SPV_1743,SPV_1744	lytR,SPV_1742,tsaE,comM	-0.11599	0.0934323	1	1	FALSE	514.441	483.141	449.475
sgRNA0646	SPV_1745	plcR	0.00876652	0.0919657	1	1	FALSE	379.46	368.38	371.14
sgRNA0647	SPV_1746,SPV_1747,SPV_1748,SPV_1749,SPV_1750,SPV_1751,SPV_1752,SPV_1753,SPV_1754,SPV_1755,SPV_2420	SPV_1746,pneA1,pneA2,lanM,wrbA,SPV_1751,clyB,SPV_1753,SPV_1754,SPV_1755,SPV_2420	0.0174863	0.141304	1	1	FALSE	209.758	228.459	205.692
sgRNA0648	SPV_1757	ndk	-0.0313174	0.150697	1	1	FALSE	235.892	233.229	211.832
sgRNA0649	SPV_2421	srf-23	2.42498	0.236083	1.58039e-09	2.99674e-08	TRUE	11.5515	177.548	798.641
sgRNA0650	SPV_1760	tRNA-Cys-1	2.91383	0.214124	3.96408e-19	1.52261e-17	TRUE	28.4593	189.104	1064.02
sgRNA0651	SPV_1761	hlyX	-0.201728	0.125426	1	1	FALSE	324.626	298.836	267.88
sgRNA0652	SPV_2422	SPV_2422	0.962619	0.107886	1	1	FALSE	215.55	441.95	917.198
sgRNA0653	SPV_1765,SPV_1766,SPV_1767	SPV_1765,coaD,SPV_1767	0.884771	0.11307	1	1	FALSE	286.348	723.85	1328.86
sgRNA0654	SPV_1768	asnA	0.105435	0.0932516	1	1	FALSE	271.872	362.142	377.942
sgRNA0655	SPV_1769	SPV_1769	-0.0657333	0.118876	1	1	FALSE	380.599	416.205	392.167
sgRNA0656	SPV_1771	yjfA	-0.0468589	0.0908442	1	1	FALSE	399.576	396.048	392.716
sgRNA0657	SPV_1772	acyP	0.108587	0.151957	1	1	FALSE	506.748	486.957	479.433
sgRNA0658	SPV_1773	yidC1	0.88135	0.177344	1	1	FALSE	124.438	631.019	1143.99
sgRNA0659	SPV_1774	pflA	-0.198577	0.114946	1	1	FALSE	264.832	296.271	259.931
sgRNA0660	SPV_1776	purR	0.69854	0.148762	1	1	FALSE	177.63	392.095	608.911
sgRNA0661	SPV_1777,SPV_1778	yhaM,rmuC	-0.181186	0.0911884	1	1	FALSE	564.683	513.734	441.247
sgRNA0662	SPV_1779,SPV_1780,SPV_1781,SPV_1782	SPV_1779,rpe,rsgA,ksgA	0.987699	0.18063	1	1	FALSE	307.395	641.279	1145.21
sgRNA0663	SPV_1783,SPV_1784,SPV_1785	SPV_1783,SPV_1784,SPV_1785	-0.055932	0.127453	1	1	FALSE	242.23	232.143	199.538
sgRNA0664	SPV_1787,SPV_1788	rnmV,tatD	0.589933	0.122588	1	1	FALSE	384.696	451.39	669.427
sgRNA0665	SPV_1790	rpmH	1.03933	0.189352	0.835476	1	FALSE	69.8337	133.597	316.997
sgRNA0666	SPV_1791	SPV_1791	0.576442	0.344837	1	1	FALSE	4.44557	26.8775	33.0658
sgRNA0667	SPV_1792	SPV_1792	-0.17837	0.118658	1	1	FALSE	201.017	222.991	203.222
sgRNA0668	SPV_1793	SPV_1793	-0.177608	0.101277	1	1	FALSE	534.94	580.999	504.952
sgRNA0669	SPV_1794	SPV_1794	-0.00868832	0.0842265	1	1	FALSE	639.396	665.658	653.604
sgRNA0670	SPV_1796	SPV_1796	-0.183368	0.10506	1	1	FALSE	328.238	268.949	249.743
sgRNA0671	SPV_1797	ccpA	0.172472	0.116509	1	1	FALSE	334.345	372.956	423.858
sgRNA0672	SPV_1798,SPV_1799,SPV_1800,SPV_1801,SPV_1802,SPV_1803	SPV_1798,SPV_1799,SPV_1800,SPV_1801,SPV_1802,SPV_1803	-0.161775	0.100705	1	1	FALSE	483.413	437.945	420.606
sgRNA0673	SPV_2423	rpmG2	0.0497675	0.231909	1	1	FALSE	114.753	215.369	159.985
sgRNA0674	SPV_1821	pbp2a	1.48216	0.192001	0.0120304	0.137569	FALSE	108.124	592.527	1568.71
sgRNA0675	SPV_1822	rluD2	-0.0154046	0.137046	1	1	FALSE	562.515	525.692	521.289
sgRNA0676	SPV_1823	gap	3.04105	0.160096	3.16214e-37	7.89481e-35	TRUE	27.015	308.871	2384.63
sgRNA0677	SPV_1824	SPV_1824	-0.21808	0.101663	1	1	FALSE	520.63	502.763	449.476
sgRNA0678	SPV_1827,SPV_2426	SPV_1827,SPV_2426	0.098356	0.121621	1	1	FALSE	297.051	281.848	298.877
sgRNA0679	SPV_1829	bguR	-0.200142	0.140516	1	1	FALSE	294.529	316.792	259.612
sgRNA0680	SPV_1830,SPV_1831,SPV_1832,SPV_1833	bguA,bguD,bguB,bguC	-0.00274568	0.0761983	1	1	FALSE	620.305	598.955	585.766
sgRNA0681	SPV_1834	adhE	0.460077	0.21347	1	1	FALSE	321.574	536.846	764.407
sgRNA0682	SPV_1838	yajC	0.134317	0.11449	1	1	FALSE	295.857	306.361	333.958
sgRNA0683	SPV_1838,SPV_1839	yajC,ulaH	0.428443	0.105877	1	1	FALSE	297.281	398.419	542.183
sgRNA0684	SPV_1840,SPV_1841	ulaG,ulaR	0.00898337	0.100519	1	1	FALSE	524.293	430.04	463.197
sgRNA0685	SPV_1851	rnpA	3.33953	0.228556	1.36544e-24	8.18171e-23	TRUE	14.3994	97.4744	742.596
sgRNA0686	SPV_1853	ackA	0.682822	0.125314	1	1	FALSE	217.546	511.463	831.69
sgRNA0687	SPV_1854	SPV_1854	0.324519	0.0912894	1	1	FALSE	347.901	463.391	554.893
sgRNA0688	SPV_2427,SPV_1857,SPV_1858,SPV_1859,SPV_1860,SPV_1861,SPV_1862,SPV_1863	SPV_2427,comGG,comGF,comGE,comGD,comGC,comGB,comGA	-0.0118721	0.108109	1	1	FALSE	726.505	723.85	709.847
sgRNA0689	SPV_1864	SPV_1864	0.0471212	0.13188	1	1	FALSE	695.529	679.751	685.438
sgRNA0690	SPV_1865	adh	-0.169389	0.0977936	1	1	FALSE	479.631	470.699	425.659
sgRNA0691	SPV_1866	nagA	0.112681	0.116818	1	1	FALSE	387.101	340.388	388.495
sgRNA0692	SPV_1867	adr	0.123083	0.130864	1	1	FALSE	225.218	291.011	320.043
sgRNA0693	SPV_1869	SPV_1869	-0.0091798	0.105262	1	1	FALSE	354.297	302.684	294.234
sgRNA0694	SPV_1870	pcp2	0.0627388	0.122711	1	1	FALSE	468.703	425.259	453.029
sgRNA0695	SPV_1870,SPV_1871,SPV_1872,SPV_2431	pcp2,SPV_1871,SPV_1872,SPV_2431	-0.222432	0.0810301	1	1	FALSE	682.45	633.992	556.449
sgRNA0696	SPV_1874	SPV_1874	-0.166744	0.0862928	1	1	FALSE	578.096	523.32	459.707
sgRNA0697	SPV_1877	thrC	0.479509	0.170452	1	1	FALSE	184.605	443.496	620.871
sgRNA0698	SPV_1878	SPV_1878	0.111259	0.0938926	1	1	FALSE	629.774	753.36	781.263
sgRNA0699	SPV_1879	tRNA-Leu-6	2.09895	0.143709	2.05575e-14	5.40265e-13	TRUE	184.247	539.998	2286.67
sgRNA0700	SPV_1879,SPV_1880,SPV_1881	tRNA-Leu-6,tRNA-Gln-2,tRNA-His-1	2.91064	0.223061	1.07593e-17	3.66306e-16	TRUE	132.625	251.089	1727.6
sgRNA0701	SPV_1896	gltX	3.63856	0.313463	3.84713e-17	1.23298e-15	TRUE	39.0461	175.494	2238.07
sgRNA0702	SPV_1897	pgi	0.412374	0.152551	1	1	FALSE	82.2022	202.762	229.973
sgRNA0703	SPV_1898,SPV_1899	SPV_1898,SPV_1899	-0.202985	0.0956169	1	1	FALSE	622.787	638.736	532.102
sgRNA0704	SPV_1902	patA	-0.0497882	0.128007	1	1	FALSE	412.162	398.732	391.143
sgRNA0705	SPV_1904	argR1	2.95981	0.158105	2.75973e-35	5.1676e-33	TRUE	81.7488	379.259	2564.58
sgRNA0706	SPV_1905	argS	1.37939	0.11215	0.000717286	0.00910589	TRUE	252.973	382.737	957.733
sgRNA0707	SPV_1908,SPV_1909	pnpR,pnpS	-0.106277	0.110762	1	1	FALSE	395.088	409.136	409.053
sgRNA0708	SPV_1918,SPV_1919	gpsA,galU	0.977777	0.218217	1	1	FALSE	343.685	791.305	1454.88
sgRNA0709	SPV_1923	dapD	0.0285347	0.127757	1	1	FALSE	372.734	345.008	354.291
sgRNA0710	SPV_2436	srf-25	0.0141683	0.0939083	1	1	FALSE	315.074	320.092	310.127
sgRNA0711	SPV_1924	SPV_1924	0.120554	0.108157	1	1	FALSE	641.775	590.426	672.888
sgRNA0712	SPV_1925	pbp1b	0.0454956	0.109046	1	1	FALSE	389.568	413.653	454.206
sgRNA0713	SPV_1926	tyrS	0.102091	0.134122	1	1	FALSE	209.333	207.115	228.705
sgRNA0714	SPV_1927,SPV_1928	ctpC,SPV_1928	0.042095	0.124568	1	1	FALSE	300.134	280.88	310.811
sgRNA0715	SPV_1929	rrmA	0.0698174	0.101774	1	1	FALSE	556.67	488.26	531.643
sgRNA0716	SPV_1932,SPV_1933	malP,malQ	0.220815	0.114819	1	1	FALSE	519.301	669.803	765.794
sgRNA0717	SPV_1934	malX	-0.0137369	0.106353	1	1	FALSE	486.502	422.212	395.845
sgRNA0718	SPV_1937,SPV_1938	malA,malR	0.20687	0.128223	1	1	FALSE	263.42	282.606	357.413
sgRNA0719	SPV_1940,SPV_1941	SPV_1940,aspS	3.35209	0.226691	3.1973e-25	2.08241e-23	TRUE	9.35684	66.1865	476.147
sgRNA0720	SPV_1943	SPV_1943	0.0479207	0.139125	1	1	FALSE	296.102	278.315	278.827
sgRNA0721	SPV_1948	SPV_1948	0.135674	0.0958306	1	1	FALSE	383.38	377.588	406.843
sgRNA0722	SPV_1950	hisS	3.63642	0.205715	1.33543e-37	4.00095e-35	TRUE	11.0847	58.4981	812.656
sgRNA0723	SPV_1951	SPV_1951	0.0769283	0.106972	1	1	FALSE	285.632	313.834	317.958
sgRNA0724	SPV_1952	rgg	-0.0352877	0.0873983	1	1	FALSE	544.915	514.625	496.713
sgRNA0725	SPV_1954	SPV_1954	-0.100547	0.111462	1	1	FALSE	377.459	390.816	365.879
sgRNA0726	SPV_1956	ilvD	-0.121458	0.0950487	1	1	FALSE	765.323	733.623	732.906
sgRNA0727	SPV_1962,SPV_2438	SPV_1962,SPV_2438	-0.197337	0.129426	1	1	FALSE	339.936	366.402	325.297
sgRNA0728	SPV_1963,SPV_1964	rpmF,rpmG3	1.28295	0.151268	0.0614067	0.647798	FALSE	152.673	379.259	820.909
sgRNA0729	SPV_1965	cbpN	-0.230939	0.117182	1	1	FALSE	390.677	352.702	296.159
sgRNA0730	SPV_2439,SPV_1969,SPV_1970,SPV_1971,SPV_1972	SPV_2439,SPV_1969,SPV_1970,SPV_1971,SPV_1972	-0.0544701	0.0814901	1	1	FALSE	639.978	559.551	541.821
sgRNA0731	SPV_1974,SPV_2441	SPV_1974,SPV_2441	-0.136151	0.102057	1	1	FALSE	558.143	508.155	469.445
sgRNA0732	SPV_2442,SPV_1975	srf-26,arcA	-0.0366404	0.10995	1	1	FALSE	374.886	343.54	345.882
sgRNA0733	SPV_1984	ybbK	-0.136569	0.092862	1	1	FALSE	634.757	614.439	567.859
sgRNA0734	SPV_1985,SPV_1986,SPV_1987,SPV_1988,SPV_1989,SPV_1990,SPV_1991,SPV_1992,SPV_1993,SPV_1994,SPV_1995	adh2,fucI,fucL,fucY,SPV_1989,SPV_1990,SPV_1991,SPV_1992,fucU,fucA,fucK	-0.246108	0.112407	1	1	FALSE	276.59	300.395	250.358
sgRNA0735	SPV_1996	fucR	0.0855229	0.127493	1	1	FALSE	260.525	224.649	254.066
sgRNA0736	SPV_2448	SPV_2448	-0.182025	0.158358	1	1	FALSE	229.478	197.629	195.517
sgRNA0737	SPV_2447,SPV_2449	srf-27,srf-28	2.50002	0.219983	9.18019e-12	2.02234e-10	TRUE	33.9044	147.494	848.659
sgRNA0738	SPV_2450	SPV_2450	-0.128834	0.148295	1	1	FALSE	217.995	229.986	209.907
sgRNA0739	SPV_2449	srf-28	1.32812	0.187851	0.08069	0.827901	FALSE	287.354	305.249	796.302
sgRNA0740	SPV_1997,SPV_1998,SPV_1999,SPV_2000	adcA,adcB,adcC,adcR	2.26127	0.12351	1.75307e-24	1.01004e-22	TRUE	132.812	665.017	2996.85
sgRNA0741	SPV_2006	SPV_2006	-0.0992154	0.100681	1	1	FALSE	879.016	905.354	831.06
sgRNA0742	SPV_2007	SPV_2007	0.0406451	0.118001	1	1	FALSE	223.214	227.013	233.878
sgRNA0743	SPV_2010,SPV_2011,SPV_2012,SPV_2013	SPV_2010,glpF,glpO,glpK	0.0196643	0.113799	1	1	FALSE	348.969	314.085	301.367
sgRNA0744	SPV_2010,SPV_2011,SPV_2012,SPV_2013,SPV_2014	SPV_2010,glpF,glpO,glpK,SPV_2014	-0.168398	0.118452	1	1	FALSE	337.609	333.244	295.462
sgRNA0745	SPV_2015,SPV_2016	hslO,SPV_2016	0.671593	0.133879	1	1	FALSE	410.516	756.709	1194.92
sgRNA0746	SPV_2017,SPV_2018	cbpA,SPV_2018	-0.0761764	0.0944188	1	1	FALSE	577.857	514.035	470.557
sgRNA0747	SPV_2022,SPV_2023	clpC,ctsR	0.58645	0.133533	1	1	FALSE	485.174	561.265	859.56
sgRNA0748	SPV_2024,SPV_2025,SPV_2026,SPV_2027	thiZ,thiY,thiX,SPV_2027	0.152061	0.0962545	1	1	FALSE	313.603	318.376	348.77
sgRNA0749	SPV_2028,SPV_2028,SPV_2454	cbpD,cbpD,srf-29	-0.104024	0.129234	1	1	FALSE	240.849	247.149	219.407
sgRNA0750	SPV_2029	SPV_2029	0.36311	0.227175	1	1	FALSE	122.725	148.617	213.051
sgRNA0751	SPV_2031,SPV_2032	rplI,pde1	1.89625	0.228401	8.70941e-05	0.00119694	TRUE	18.4573	85.097	250.08
sgRNA0752	SPV_2033	hpf	0.148021	0.0890015	1	1	FALSE	312.043	358.894	403.491
sgRNA0753	SPV_2034,SPV_2035	comFC,comFA	-0.0360114	0.111129	1	1	FALSE	642.561	589.724	597.432
sgRNA0754	SPV_2036	SPV_2036	-0.0630581	0.102889	1	1	FALSE	389.072	381.021	372.218
sgRNA0755	SPV_2037	cysK	-0.148612	0.107978	1	1	FALSE	274.166	248.987	234.934
sgRNA0756	SPV_2042,SPV_2458	rpsB,srf-30	2.31838	0.360259	0.000252673	0.0033795	TRUE	30.6126	112.412	364.846
sgRNA0757	SPV_2043	pcsB	1.72023	0.319939	0.0243763	0.270487	FALSE	5.34652	35.7197	104.914
sgRNA0758	SPV_2049,SPV_2050,SPV_2051,SPV_2052	pgsA,rodZ,SPV_2051,SPV_2052	0.578509	0.23538	1	1	FALSE	102.25	171.631	241.625
sgRNA0759	SPV_2053,SPV_2054	SPV_2053,recF	-0.0812409	0.0863003	1	1	FALSE	434.732	414.482	400.686
sgRNA0760	SPV_2055	guaB	1.58284	0.301984	0.0536034	0.569488	FALSE	145.835	605.134	1776.45
sgRNA0761	SPV_2056	trpS	3.6497	0.298657	7.18103e-19	2.6893e-17	TRUE	18.5399	115.415	1272.62
sgRNA0762	SPV_2057	SPV_2057	0.114514	0.124713	1	1	FALSE	446.259	428.219	481.568
sgRNA0763	SPV_2060	pipR	0.0451877	0.144124	1	1	FALSE	184.078	158.893	164.255
sgRNA0764	SPV_2062,SPV_2063,SPV_2064,SPV_2065	tRNA-Glu-5,comE,comD,comC1	0.238425	0.122891	1	1	FALSE	221.742	191.101	235.867
sgRNA0765	SPV_2066	tRNA-Arg-5	-0.0260377	0.166196	1	1	FALSE	81.0191	269.413	254.732
sgRNA0766	SPV_2066,SPV_2067	tRNA-Arg-5,rlmH	0.0371506	0.0928929	1	1	FALSE	587.502	596.048	639.386
sgRNA0767	SPV_2068,SPV_2069	htrA,parB	0.422609	0.134715	1	1	FALSE	203.445	299.256	376.989
sgRNA0768	SPV_2069	parB	0.111374	0.139994	1	1	FALSE	321.991	302.684	340.553
sgRNA0769	SPV_0005	pth	-0.340136	0.138969	1	1	FALSE	515.646	272.729	210.937
sgRNA0770	SPV_0011	tilS	0.0478069	0.179914	1	1	FALSE	103.057	111.081	107.682
sgRNA0771	SPV_0013	ftsH	1.78129	0.391097	0.0457495	0.489519	FALSE	31.2515	121.739	381.939
sgRNA0772	SPV_0038	polA	0.129611	0.11587	1	1	FALSE	313.105	421.344	453.483
sgRNA0773	SPV_0111	argH	-0.151716	0.108082	1	1	FALSE	599.336	558.894	526.093
sgRNA0774	SPV_0130	rnjA	-0.0938473	0.273757	1	1	FALSE	246.355	65.4882	54.7847
sgRNA0775	SPV_0136	tsaD	1.61919	0.164163	0.000162084	0.00220728	TRUE	135.043	526.341	1344.89
sgRNA0776	SPV_0214	adk	2.66833	0.229458	3.57443e-13	8.77787e-12	TRUE	12.3374	51.4784	312.799
sgRNA0777	SPV_0270	sulB	0.58371	0.191323	1	1	FALSE	230.77	358.248	528.731
sgRNA0778	SPV_0271	sulC	0.846506	0.174302	1	1	FALSE	286.189	354.797	633.53
sgRNA0779	SPV_0272	sulD	0.408725	0.13427	1	1	FALSE	127.196	201.438	274.9
sgRNA0780	SPV_0305	ftsL	3.24498	0.989972	0.023346	0.260987	FALSE	0	1.05058	15.2883
sgRNA0781	SPV_0331	cps2O	-0.132716	0.113765	1	1	FALSE	339.685	421.283	372.334
sgRNA0782	SPV_0403	SPV_0403	0.321296	0.142776	1	1	FALSE	290.968	469.609	606.118
sgRNA0783	SPV_0494	valS	3.44591	0.183527	1.60734e-40	8.02597e-38	TRUE	34.6715	219.571	1895.07
sgRNA0784	SPV_0506	pheT	3.23906	0.169039	4.77155e-40	1.78694e-37	TRUE	22.662	126.07	1400.93
sgRNA0785	SPV_0600	divIB	0.22098	0.586865	1	1	FALSE	38.6288	6.41279	9.74121
sgRNA0786	SPV_0678	rimM	0.907137	0.135731	1	1	FALSE	269.535	682.877	1263.17
sgRNA0787	SPV_0679	trmD	0.620478	0.140547	1	1	FALSE	167.302	262.451	389.778
sgRNA0788	SPV_0706	rodA	1.39945	0.192703	0.0381851	0.417528	FALSE	50.1725	174.911	455.323
sgRNA0789	SPV_0709	gyrB	2.11312	0.152284	2.68104e-13	6.69366e-12	TRUE	221.271	497.234	2039.92
sgRNA0790	SPV_0748	parC	-0.0715519	0.173341	1	1	FALSE	200.092	209.057	199.604
sgRNA0791	SPV_0760	dnaX	0.894426	0.15322	1	1	FALSE	41.1391	81.423	154.351
sgRNA0792	SPV_0768	cozE	0.23633	0.166342	1	1	FALSE	238.734	99.4757	138.474
sgRNA0793	SPV_0820	rluD1	0.12912	0.147798	1	1	FALSE	508.507	633.992	696.1
sgRNA0794	SPV_0827	yabA	-0.219868	0.146508	1	1	FALSE	639.445	403.706	367.735
sgRNA0795	SPV_0835	frr	0.467481	0.171761	1	1	FALSE	173.634	393.968	559.351
sgRNA0796	SPV_0847	infC	2.72152	0.260725	4.03384e-11	8.51084e-10	TRUE	14.3806	90.3499	498.664
sgRNA0797	SPV_0848	rpmI	2.83719	0.246582	9.29043e-14	2.35883e-12	TRUE	21.2493	70.5407	340.727
sgRNA0798	SPV_0859	coaE	0.0353386	0.102504	1	1	FALSE	407.747	498.208	498.837
sgRNA0799	SPV_0877	mtnN	0.146384	0.0938426	1	1	FALSE	625.857	742.293	858.935
sgRNA0800	SPV_0879	dnaQ	-0.618558	0.164461	1	1	FALSE	567.199	298.638	199.329
sgRNA0801	SPV_0880	SPV_0880	-0.640067	0.141017	1	1	FALSE	294.266	219.317	148.396
sgRNA0802	SPV_0906	prfA	0.627076	0.117142	1	1	FALSE	237.865	459.104	736.141
sgRNA0803	SPV_0908	tsaC	0.576551	0.125433	1	1	FALSE	392.644	546.302	792.403
sgRNA0804	SPV_0964	obgE	0.976448	0.151209	1	1	FALSE	100.065	206.815	404.925
sgRNA0805	SPV_0965	SPV_0965	0.296178	0.154289	1	1	FALSE	181.209	249.518	342.688
sgRNA0806	SPV_0970	map	0.0259498	0.15972	1	1	FALSE	249.065	193.149	195.969
sgRNA0807	SPV_0979	nifS	1.5839	0.188004	0.00189782	0.0234954	TRUE	136.941	404.473	1159.05
sgRNA0808	SPV_0989	rplU	1.86609	0.215151	5.68558e-05	0.000788612	TRUE	60.3655	121.867	370.389
sgRNA0809	SPV_0990	SPV_0990	2.09534	0.246796	9.06922e-06	0.000135857	TRUE	52.2651	133.424	446.38
sgRNA0810	SPV_0991	rpmA	1.92806	0.201583	4.14768e-06	6.47211e-05	TRUE	60.7469	294.162	979.596
sgRNA0811	SPV_1101	ftsY	0.234872	0.105247	1	1	FALSE	219.078	412.648	485.833
sgRNA0812	SPV_1104	smc	0.0988307	0.667398	1	1	FALSE	1.6959	12.8723	12.0053
sgRNA0813	SPV_1129	licD1	0.264899	0.245772	1	1	FALSE	69.0225	98.0238	118.616
sgRNA0814	SPV_1142	ffh	1.36571	0.144814	0.011558	0.134217	FALSE	37.4785	187.352	468.181
sgRNA0815	SPV_1187	rplL	1.0707	0.123184	0.565997	1	FALSE	275.906	485.368	1062.87
sgRNA0816	SPV_1188	rplJ	3.19176	0.340686	1.24802e-10	2.49272e-09	TRUE	11.7807	70.3687	712.077
sgRNA0817	SPV_1349	murC	1.30834	0.413218	0.455549	1	FALSE	6.39314	10.2767	17.6857
sgRNA0818	SPV_1373	aspC	3.43014	0.30356	1.19028e-15	3.30192e-14	TRUE	24.6968	115.564	1279.65
sgRNA0819	SPV_1398	engB	0.582052	0.115862	1	1	FALSE	283.052	615.297	946.07
sgRNA0820	SPV_1399	clpX	0.679615	0.149108	1	1	FALSE	65.556	123.126	193.892
sgRNA0821	SPV_1428	cmk	0.57149	0.149706	1	1	FALSE	115.695	321.478	468.645
sgRNA0822	SPV_1472	ileS	3.85757	0.268628	1.99105e-26	1.42028e-24	TRUE	10.5143	48.3267	471.657
sgRNA0823	SPV_2374,SPV_1474	SPV_2374,divIVA	2.6489	0.203383	5.17271e-16	1.49014e-14	TRUE	35.1273	98.0238	656.294
sgRNA0824	SPV_1483	murF	0.88455	0.35648	1	1	FALSE	1.5078	21.0116	48.8683
sgRNA0825	SPV_1485	recR	0.290191	0.137709	1	1	FALSE	358.588	230.83	257.887
sgRNA0826	SPV_1508	alr	0.205579	0.251995	1	1	FALSE	9.67438	50.0198	76.5839
sgRNA0827	SPV_1509	acpS	0.606284	0.34076	1	1	FALSE	5.87957	46.422	78.0828
sgRNA0828	SPV_1519	engA	0.898389	0.138346	1	1	FALSE	136.645	327.052	625.01
sgRNA0829	SPV_1521	dnaI	1.35122	0.153139	0.0218203	0.245765	FALSE	41.6039	159.99	424.279
sgRNA0830	SPV_1545	fmt	0.449717	0.220185	1	1	FALSE	97.459	242.684	341.593
sgRNA0831	SPV_1546	priA	0.350666	0.19841	1	1	FALSE	77.0956	251.384	346.587
sgRNA0832	SPV_1655	scpB	-0.03625	0.204029	1	1	FALSE	207.047	120.817	132.875
sgRNA0833	SPV_1656	scpA	-0.243643	0.116671	1	1	FALSE	486.894	319.98	284.566
sgRNA0834	SPV_1758	rpoC	2.72495	0.197302	2.27567e-18	7.9278e-17	TRUE	15.8898	152.624	791.646
sgRNA0835	SPV_1759	rpoB	2.73603	0.198429	2.15501e-18	7.68619e-17	TRUE	26.0821	262.645	1298.26
sgRNA0836	SPV_1764	murA-2	0.84668	0.0925335	1	1	FALSE	317.082	651.384	1291.72
sgRNA0837	SPV_1819	nusG	0.525033	0.131561	1	1	FALSE	804.973	804.095	1011.2
sgRNA0838	SPV_1820	secE	-0.103299	0.222476	1	1	FALSE	152.152	256.342	171.626
sgRNA0839	SPV_1849	eloR	2.50208	0.121085	2.44987e-35	5.1676e-33	TRUE	64.7951	366.652	2022.55
sgRNA0840	SPV_2030	dnaC	1.11766	0.154505	0.446336	1	FALSE	66.9898	135.525	314.692
sgRNA0841	SPV_2041	tsf	2.30478	0.136427	1.13367e-21	5.30699e-20	TRUE	53.7291	202.762	886.381
sgRNA0842	SPV_2044	mreD	1.08748	0.182744	0.632165	1	FALSE	130.476	274.387	537.512
sgRNA0843	SPV_2045	mreC	1.17588	0.207471	0.396575	1	FALSE	151.498	247.149	526.417
sgRNA0844	SPV_0621,SPV_0619	lctO,SPV_0619	-0.250887	0.108083	1	1	FALSE	463.959	482.214	407.539
sgRNA0845	NA	NA	0.0583078	0.118331	1	1	FALSE	388.266	355.276	373.148
sgRNA0846	SPV_2297,SPV_1038	phtB,phtA	-0.0224691	0.0990727	1	1	FALSE	584.931	575.718	541.291
sgRNA0847	SPV_1038	phtA	-0.0101536	0.0987338	1	1	FALSE	364.305	343.262	339.872
sgRNA0848	SPV_2214,SPV_0639,SPV_2318,SPV_1316,SPV_2348,SPV_2221,SPV_0711	SPV_2214,SPV_0639,SPV_2318,SPV_1316,SPV_2348,SPV_2221,SPV_0711	-0.0454926	0.146747	1	1	FALSE	387.668	372.205	339.021
sgRNA0849	SPV_2163,SPV_2407	SPV_2163,SPV_2407	0.0320435	0.159376	1	1	FALSE	1024.55	1178.79	1126.43
sgRNA0850	SPV_1058,SPV_0559,SPV_0560,SPV_0561,SPV_0562	SPV_1058,SPV_0559,SPV_0560,SPV_0561,bgaA	-0.0537535	0.0803573	1	1	FALSE	1122.37	1119.92	1072.39
sgRNA0851	SPV_0085,SPV_2094,SPV_1317	SPV_0085,SPV_2094,SPV_1317	0.0337714	0.13156	1	1	FALSE	222.523	216.36	203.17
sgRNA0852	SPV_1682,SPV_1683,SPV_1887	tRNA-Ser-2,tRNA-Ile-1,tRNA-Ile-2	3.28721	0.387057	3.43667e-09	6.43517e-08	TRUE	8.84007	58.8325	352.762
sgRNA0853	SPV_1883,SPV_0755	tRNA-Tyr-2,tRNA-Tyr-1	4.01865	0.369957	3.36578e-16	1.02897e-14	TRUE	13.6331	101.976	1321.72
sgRNA0854	SPV_0794,SPV_2241,SPV_2251,SPV_0832,SPV_2274,SPV_0971,SPV_1966	SPV_0794,SPV_2241,SPV_2251,SPV_0832,SPV_2274,SPV_0971,SPV_1966	0.133891	0.0967084	1	1	FALSE	439.263	433.368	481.563
sgRNA0855	SPV_2274,SPV_0972,SPV_2304,SPV_2305,SPV_1170,SPV_1171,SPV_1172,SPV_1173,SPV_2322,SPV_1539,SPV_2386,SPV_1906,SPV_1967,SPV_2414,SPV_2415,SPV_2083,SPV_0045	SPV_2274,SPV_0972,SPV_2304,SPV_2305,appA,SPV_1171,nanE-2,SPV_1173,SPV_2322,SPV_1539,SPV_2386,SPV_1906,SPV_1967,SPV_2414,SPV_2415,SPV_2083,SPV_0045	-0.146228	0.0949749	1	1	FALSE	672.876	578.87	531.641
sgRNA0856	SPV_0041,SPV_0042,SPV_0043,SPV_0044,SPV_0045	araT,recO,plsX,SPV_0044,SPV_0045	-0.0654816	0.111064	1	1	FALSE	421.718	493.234	492.261
sgRNA0857	SPV_2432	SPV_2432	-0.143086	0.0860805	1	1	FALSE	590.301	596.838	527.038
sgRNA0858	SPV_2326	SPV_2326	0.288988	0.128248	1	1	FALSE	232.116	200.808	268.957
sgRNA0859	SPV_1682	tRNA-Ser-2	2.4034	0.211118	2.98117e-11	6.3797e-10	TRUE	11.7591	67.9842	351.044
sgRNA0860	SPV_1700,SPV_1814,SPV_1891,SPV_0018	rrlB,rrlC,rrlD,rrlA	2.79759	0.193318	1.42302e-20	5.7613e-19	TRUE	56.0546	352.995	2217.33
sgRNA0861	SPV_1703,SPV_1817,SPV_1894,SPV_2062,SPV_0015	tRNA-Glu-2,tRNA-Glu-3,tRNA-Glu-4,tRNA-Glu-5,tRNA-Glu-1	2.10564	0.2997	0.00022501	0.00303662	TRUE	12.1741	48.3267	130.777
sgRNA0862	SPV_1699,SPV_1813,SPV_1890,SPV_0019	rrfB,rrfC,rrfD,rrfA	1.73115	0.248063	0.00320423	0.0387092	TRUE	21.9583	117.665	383.269
sgRNA0863	SPV_1818,SPV_0014	comX2,comX1	-0.151682	0.099012	1	1	FALSE	508.485	520.949	436.877
sgRNA0864	SPV_1682,SPV_1683,SPV_1684,SPV_1685,SPV_1686,SPV_1687,SPV_1688,SPV_1689,SPV_1690,SPV_1691,SPV_1692,SPV_1693,SPV_1694,SPV_1695,SPV_1804,SPV_1805,SPV_1806,SPV_1807,SPV_1808,SPV_1809	tRNA-Ser-2,tRNA-Ile-1,tRNA-Gly-1,tRNA-Phe-1,tRNA-fMet-1,tRNA-Ser-3,tRNA-Ile2-1,tRNA-Met-1,tRNA-Pro-1,tRNA-Arg-3,tRNA-Leu-2,tRNA-Gly-2,tRNA-Thr-2,tRNA-Leu-3,tRNA-Pro-2,tRNA-Arg-4,tRNA-Leu-4,tRNA-Gly-3,tRNA-Thr-3,tRNA-Leu-5	2.6795	0.206992	4.90552e-16	1.44088e-14	TRUE	26.1211	134.474	776.493
sgRNA0865	SPV_0358,SPV_2155,SPV_2156,SPV_2341,SPV_2343,SPV_1315,SPV_2346,SPV_0743,SPV_2230,SPV_0744	SPV_0358,SPV_2155,SPV_2156,SPV_2341,SPV_2343,SPV_1315,SPV_2346,SPV_0743,SPV_2230,SPV_0744	0.0368164	0.11768	1	1	FALSE	321.769	294.071	299.95
sgRNA0866	SPV_1702,SPV_1816,SPV_1893,SPV_0016	rrsB,rrsC,rrsD,rrsA	1.06706	0.160621	0.676326	1	FALSE	68.4616	254.24	461.08
sgRNA0868	SPV_1623,SPV_2086,SPV_0049,SPV_0050	SPV_1623,srf-03,comA,comB	0.270053	0.289852	1	1	FALSE	685.812	702.962	946.29
sgRNA0869	SPV_2143,SPV_0314,SPV_1825,SPV_2425,SPV_2268,SPV_1014,SPV_2263,SPV_2264,SPV_2223,SPV_0716,SPV_2093,SPV_2070,SPV_2071	SPV_2143,SPV_0314,SPV_1825,SPV_2425,SPV_2268,SPV_1014,SPV_2263,SPV_2264,SPV_2223,SPV_0716,SPV_2093,SPV_2070,SPV_2071	-0.183311	0.166909	1	1	FALSE	213.169	179.447	146.413
sgRNA0870	SPV_0003	SPV_0003	0.626233	0.140425	1	1	FALSE	252.213	427.586	641.781
sgRNA0871	SPV_0006	mfd	-0.140514	0.167384	1	1	FALSE	299.069	140.924	133.857
sgRNA0872	SPV_0010	SPV_0010	0.653793	0.166068	1	1	FALSE	140.041	142.293	213.147
sgRNA0873	SPV_1701,SPV_1815,SPV_1892,SPV_0017	tRNA-Ala-2,tRNA-Ala-3,tRNA-Ala-4,tRNA-Ala-1	-0.0607367	0.0859206	1	1	FALSE	399.088	484.807	482.429
sgRNA0874	SPV_0034,SPV_2080	SPV_0034,SPV_2080	-0.0351507	0.131103	1	1	FALSE	194.642	183.406	187.304
sgRNA0875	SPV_0047	SPV_0047	0.185699	0.123149	1	1	FALSE	271.601	231.702	257.708
sgRNA0876	SPV_0063	strH	-0.163167	0.0933749	1	1	FALSE	429.421	438.635	388.266
sgRNA0877	SPV_0077	cabP	-0.0386813	0.0972986	1	1	FALSE	833.869	757.313	759.857
sgRNA0878	SPV_0086	SPV_0086	-0.175976	0.107163	1	1	FALSE	462.543	467.695	401.294
sgRNA0879	SPV_0086,SPV_0087	SPV_0086,SPV_0087	-0.0592879	0.12427	1	1	FALSE	277.261	261.642	261.33
sgRNA0880	SPV_0088	SPV_0088	-0.0346191	0.115586	1	1	FALSE	305.658	250.038	258.078
sgRNA0881	SPV_0089	SPV_0089	-0.0237193	0.09711	1	1	FALSE	283.818	263.241	263.156
sgRNA0882	SPV_0090	SPV_0090	0.0558888	0.0924808	1	1	FALSE	387.655	374.507	411.174
sgRNA0883	SPV_0106	SPV_0106	-0.0579033	0.120889	1	1	FALSE	203.051	224.837	222.855
sgRNA0884	SPV_0109	SPV_0109	0.179706	0.14413	1	1	FALSE	160.675	141.828	157.92
sgRNA0885	SPV_0110	argG	0.170717	0.155638	1	1	FALSE	288.707	251.439	287.334
sgRNA0886	SPV_0113,SPV_2097	SPV_0113,SPV_2097	-0.147356	0.115141	1	1	FALSE	607.718	562.846	520.519
sgRNA0887	SPV_0114	SPV_0114	0.0175744	0.117868	1	1	FALSE	385.963	349.823	367.931
sgRNA0888	SPV_0115	SPV_0115	-0.195101	0.0878457	1	1	FALSE	513.372	487.432	418.883
sgRNA0889	SPV_0116	SPV_0116	0.126938	0.101549	1	1	FALSE	458.148	399.9	436.482
sgRNA0890	SPV_0117	SPV_0117	-0.202067	0.108278	1	1	FALSE	364.844	366.799	320.05
sgRNA0891	SPV_0118	SPV_0118	-0.109861	0.126152	1	1	FALSE	201.479	187.253	182.082
sgRNA0892	SPV_0135	rimI	1.69711	0.20267	0.000582505	0.00752234	TRUE	112.937	320.64	1034.11
sgRNA0893	SPV_0138	epsF	-0.076223	0.115659	1	1	FALSE	281.321	272.729	273.016
sgRNA0894	SPV_0139	SPV_0139	-0.0817672	0.113635	1	1	FALSE	338.891	353.968	342.921
sgRNA0895	SPV_0140	SPV_0140	-0.240499	0.144721	1	1	FALSE	285.088	268.603	257.448
sgRNA0896	SPV_0141	SPV_0141	0.00570719	0.127048	1	1	FALSE	240.353	240.283	231.7
sgRNA0897	SPV_0142	SPV_0142	-0.134223	0.112262	1	1	FALSE	371.946	335.539	299.667
sgRNA0898	SPV_0143	ugd	-0.0817862	0.110218	1	1	FALSE	310.575	304.23	276.651
sgRNA0899	SPV_0149	azlC	-0.47602	0.171963	1	1	FALSE	669.78	96.9888	69.1366
sgRNA0900	SPV_0152	dapE	-0.113943	0.125207	1	1	FALSE	190.568	189.652	167.4
sgRNA0901	SPV_0172	SPV_0172	-0.115175	0.103168	1	1	FALSE	294.838	286.822	261.953
sgRNA0902	SPV_0179	SPV_0179	-0.117335	0.156292	1	1	FALSE	256.247	242.688	232.936
sgRNA0903	SPV_0183	folC	0.141793	0.144097	1	1	FALSE	258.485	376.285	407.29
sgRNA0904	SPV_0225	SPV_0225	0.00677777	0.156826	1	1	FALSE	239.798	247.937	245.059
sgRNA0905	SPV_0230	deoR	-0.32891	0.114523	1	1	FALSE	507.096	356.455	292.697
sgRNA0906	SPV_0231	SPV_0231	-0.269296	0.121424	1	1	FALSE	273.067	251.384	202.888
sgRNA0907	SPV_0232	SPV_0232	-0.0710825	0.122742	1	1	FALSE	236.013	233.992	216.622
sgRNA0908	SPV_0233	SPV_0233	0.0354464	0.111298	1	1	FALSE	278.206	274.467	271.674
sgRNA0909	SPV_0234	SPV_0234	-0.0173309	0.131936	1	1	FALSE	226.522	257.708	254.789
sgRNA0910	SPV_0235	SPV_0235	0.10069	0.120506	1	1	FALSE	241.193	243.716	247.555
sgRNA0911	SPV_0236	talC	-0.00610564	0.0936396	1	1	FALSE	416.866	373.863	381.651
sgRNA0912	SPV_0237	gldA	-0.165339	0.114607	1	1	FALSE	349.664	327.781	302.424
sgRNA0913	SPV_0240	SPV_0240	-0.158556	0.12335	1	1	FALSE	435.47	403.162	323.208
sgRNA0914	SPV_0242	SPV_0242	1.17085	0.159847	0.285156	1	FALSE	60.8983	165.992	337.266
sgRNA0915	SPV_0256	relE1	0.0475517	0.0953733	1	1	FALSE	485.932	478.851	494.255
sgRNA0916	SPV_0257	SPV_0257	0.130269	0.1047	1	1	FALSE	252.584	271.071	279.233
sgRNA0917	SPV_0258	pepS	0.205746	0.118713	1	1	FALSE	234.106	239.838	271.761
sgRNA0918	SPV_0259	SPV_0259	-0.0822608	0.0994511	1	1	FALSE	330.822	350.988	332.199
sgRNA0919	SPV_0268	SPV_0268	0.122625	0.18286	1	1	FALSE	126.694	120.949	117.732
sgRNA0920	SPV_0276	SPV_0276	0.00607804	0.149365	1	1	FALSE	122.773	122.687	125.893
sgRNA0921	SPV_0285	SPV_0285	-0.118658	0.121872	1	1	FALSE	255.105	287.859	250.248
sgRNA0922	SPV_0287	spnHL	0.0553774	0.0998473	1	1	FALSE	408.015	364.551	382.223
sgRNA0923	SPV_0293	SPV_0293	-0.116468	0.117349	1	1	FALSE	215.231	200.609	184.868
sgRNA0924	SPV_0294	ugl	0.00551533	0.119194	1	1	FALSE	368.431	314.625	339.968
sgRNA0925	SPV_0295	SPV_0295	0.00504792	0.107443	1	1	FALSE	272.705	245.432	230.162
sgRNA0926	SPV_0296	SPV_0296	-0.209775	0.114237	1	1	FALSE	386.203	397.119	352.399
sgRNA0927	SPV_0297	SPV_0297	0.0196846	0.105016	1	1	FALSE	445.519	418.182	393.435
sgRNA0928	SPV_0298	yajC-1	-0.114094	0.0936679	1	1	FALSE	419.311	455.952	424.805
sgRNA0929	SPV_0302	SPV_0302	-0.141906	0.124919	1	1	FALSE	382.235	337.255	291.177
sgRNA0930	SPV_0335	eng	-0.283979	0.118918	1	1	FALSE	514.953	546.37	456.707
sgRNA0931	SPV_0341	rlmL	1.32306	0.0802432	5.67175e-05	0.000788612	TRUE	251.704	629.886	1567.04
sgRNA0932	SPV_0342	mapZ	1.34478	0.126256	0.0063185	0.0739462	FALSE	129.663	331.226	786.639
sgRNA0933	SPV_0345	cbpF	0.0540156	0.0889571	1	1	FALSE	541.982	480.959	517.668
sgRNA0934	SPV_0360	mtlA	0.162752	0.140629	1	1	FALSE	200.614	212.905	227.57
sgRNA0935	SPV_0361	mtlR	-0.161406	0.118293	1	1	FALSE	371.694	367.29	326.216
sgRNA0936	SPV_0362	mtlA2	-0.054163	0.113075	1	1	FALSE	529.591	475.099	398
sgRNA0937	SPV_0363	mtlD	0.0269644	0.101673	1	1	FALSE	256.241	259.289	259.414
sgRNA0938	SPV_0364	SPV_0364	0.0633992	0.121805	1	1	FALSE	264.168	261.594	261.709
sgRNA0939	SPV_0366	yrrC	-0.359433	0.158487	1	1	FALSE	176.984	173.346	149.892
sgRNA0940	SPV_0371	mutS2	0.0984578	0.104893	1	1	FALSE	356.973	383.485	368.733
sgRNA0941	SPV_0400	SPV_0400	-0.084943	0.10386	1	1	FALSE	255.063	237.913	230.392
sgRNA0942	SPV_0413	SPV_0413	-0.0362372	0.12178	1	1	FALSE	396.311	396.048	376.006
sgRNA0943	SPV_0418	SPV_0418	-0.0683275	0.139563	1	1	FALSE	402.662	223.774	235.298
sgRNA0944	SPV_0419	dinP	-0.0723298	0.136135	1	1	FALSE	276.625	278.042	276.658
sgRNA0945	SPV_0422	SPV_0422	-0.159629	0.114288	1	1	FALSE	363.53	347.036	329.479
sgRNA0946	SPV_0424	SPV_0424	0.0569265	0.120661	1	1	FALSE	308.689	275.89	287.111
sgRNA0947	SPV_0425	SPV_0425	-0.0397864	0.131146	1	1	FALSE	224.918	206.324	168.847
sgRNA0948	SPV_0426	lacF-1	-0.163574	0.161737	1	1	FALSE	184.993	168.015	146.002
sgRNA0949	SPV_0427	lacG-1	-0.0261245	0.199509	1	1	FALSE	53.4207	55.336	52.2848
sgRNA0950	SPV_0428	lacE-1	-0.121382	0.107103	1	1	FALSE	449.525	403.423	389.525
sgRNA0951	SPV_0432	mtsA	-0.208838	0.103101	1	1	FALSE	432.908	415.811	363.58
sgRNA0952	SPV_0433	SPV_0433	-0.253955	0.132334	1	1	FALSE	544.059	411.166	321.933
sgRNA0953	SPV_0435	mtsC	-0.0607935	0.0961291	1	1	FALSE	310.438	304.645	295.323
sgRNA0954	SPV_0436	cspR	-0.128165	0.116977	1	1	FALSE	243.141	270.356	250.349
sgRNA0955	SPV_0438	SPV_0438	0.0101342	0.102529	1	1	FALSE	267.741	250.347	251.442
sgRNA0956	SPV_0439	SPV_0439	-0.137254	0.131433	1	1	FALSE	221.935	214.229	181.651
sgRNA0957	SPV_0440	SPV_0440	-0.0812045	0.155424	1	1	FALSE	196.526	199.092	193.537
sgRNA0958	SPV_0449	SPV_0449	-0.0337618	0.114174	1	1	FALSE	335.73	303.787	273.302
sgRNA0959	SPV_0453	SPV_0453	0.0467512	0.118337	1	1	FALSE	236.45	217.113	209.955
sgRNA0960	SPV_0456	SPV_0456	0.0245495	0.125892	1	1	FALSE	297.625	301.743	287.159
sgRNA0961	SPV_0457	SPV_0457	-0.0850692	0.102201	1	1	FALSE	423.222	411.858	392.48
sgRNA0962	SPV_0484	SPV_0484	-0.0786555	0.130808	1	1	FALSE	340.324	339.921	308.367
sgRNA0963	SPV_0485	SPV_0485	-0.121108	0.133053	1	1	FALSE	205.428	200.661	171.346
sgRNA0964	SPV_0486	SPV_0486	0.00828623	0.13802	1	1	FALSE	258.048	245.059	241.085
sgRNA0965	SPV_0489	SPV_0489	0.109986	0.131787	1	1	FALSE	220.773	244.785	267.909
sgRNA0966	SPV_0493	SPV_0493	3.4574	0.229941	1.16998e-26	8.76316e-25	TRUE	12.2221	126.07	948.93
sgRNA0967	SPV_0501	bglG	-0.0815204	0.0952902	1	1	FALSE	796.951	697.68	670.971
sgRNA0968	SPV_0502	bglF	-0.123367	0.081712	1	1	FALSE	562.836	591.881	537.75
sgRNA0969	SPV_0503	bglA-2	0.0358592	0.0928411	1	1	FALSE	406.037	411.827	415.803
sgRNA0970	SPV_0508,SPV_2186	SPV_0508,SPV_2186	0.0368692	0.112332	1	1	FALSE	313.849	314.177	315.099
sgRNA0971	SPV_0509	higA	0.0556627	0.102644	1	1	FALSE	396.173	358.113	377.78
sgRNA0972	SPV_0534	estA	-0.310602	0.0977792	1	1	FALSE	778.458	626.697	492.95
sgRNA0973	SPV_0543	SPV_0543	-0.135859	0.0795076	1	1	FALSE	874.7	826.087	756.964
sgRNA0974	SPV_0552	SPV_0552	-0.136977	0.116876	1	1	FALSE	321.687	324.487	276.389
sgRNA0975	SPV_0553	SPV_0553	0.02302	0.104429	1	1	FALSE	299.836	275.468	260.738
sgRNA0976	SPV_0555	SPV_0555	-0.00702699	0.123315	1	1	FALSE	200.997	166.482	162.707
sgRNA0977	SPV_0556	SPV_0556	0.0762649	0.101421	1	1	FALSE	311.227	286.957	327.897
sgRNA0978	SPV_0557,SPV_2194	SPV_0557,SPV_2194	-0.197557	0.0863542	1	1	FALSE	513.116	472.51	436.864
sgRNA0979	SPV_0563,SPV_2199	SPV_0563,SPV_2199	-0.124945	0.118647	1	1	FALSE	357.447	301.401	286.843
sgRNA0980	SPV_2201,SPV_0566,SPV_0567	SPV_2201,SPV_0566,ytqB	-0.282366	0.08962	1	1	FALSE	642.348	588.933	481.092
sgRNA0981	SPV_0568	SPV_0568	0.0971732	0.120434	1	1	FALSE	338.729	291.011	324.801
sgRNA0982	SPV_0569	nha2	-0.165872	0.139766	1	1	FALSE	260.269	214.702	184.203
sgRNA0983	SPV_0570	yihY	0.0192173	0.11571	1	1	FALSE	430.666	365.602	359.98
sgRNA0984	SPV_0577	zmpB	-0.0879287	0.114947	1	1	FALSE	498.072	446.241	393.772
sgRNA0985	SPV_0591	SPV_0591	-0.104634	0.102013	1	1	FALSE	538.2	508.886	480.702
sgRNA0986	SPV_0601	SPV_0601	-0.479459	0.163152	1	1	FALSE	462.793	143.647	108.794
sgRNA0987	SPV_0602	SPV_0602	-0.453834	0.21799	1	1	FALSE	575.338	141.502	97.2691
sgRNA0988	SPV_0605	SPV_0605	-0.0918293	0.106406	1	1	FALSE	327.248	327.441	288.055
sgRNA0989	SPV_0606	SPV_0606	0.0739306	0.178042	1	1	FALSE	115.254	96.6534	104.522
sgRNA0990	SPV_0607	SPV_0607	-0.170208	0.119615	1	1	FALSE	269.769	298.427	255.425
sgRNA0991	SPV_0611	SPV_0611	0.201916	0.187122	1	1	FALSE	109.467	96.1919	106.017
sgRNA0992	SPV_0612	SPV_0612	0.0721756	0.130109	1	1	FALSE	240.916	193.666	212.651
sgRNA0993	SPV_0613	SPV_0613	0.0599206	0.151639	1	1	FALSE	142.51	127.273	138.619
sgRNA0994	SPV_0614	SPV_0614	0.105248	0.0953623	1	1	FALSE	526.947	495.156	526.69
sgRNA0995	SPV_0623	thiM-1	0.0247676	0.0984371	1	1	FALSE	291.821	291.7	296.139
sgRNA0996	SPV_0624	thiE-1	0.0785434	0.13626	1	1	FALSE	123.449	131.225	149.138
sgRNA0997	SPV_0632	thiD	-0.0567593	0.0934626	1	1	FALSE	510.012	457.397	440.422
sgRNA0998	SPV_0637	SPV_0637	-0.181716	0.101623	1	1	FALSE	376.218	383.399	328.566
sgRNA0999	SPV_0640,SPV_2215	SPV_0640,SPV_2215	-0.216567	0.0771365	1	1	FALSE	795.308	765.963	673.477
sgRNA1000	SPV_0642	SPV_0642	0.00531507	0.155944	1	1	FALSE	213.835	203.953	196.783
sgRNA1001	SPV_0643	SPV_0643	0.1778	0.143491	1	1	FALSE	215.284	204.863	243.625
sgRNA1002	SPV_0653	livH	-0.0852204	0.126602	1	1	FALSE	451.72	421.114	390.372
sgRNA1003	SPV_0654	livM	0.00996849	0.106025	1	1	FALSE	399.218	353.139	364
sgRNA1004	SPV_0655	livG	-0.0801103	0.119233	1	1	FALSE	393.426	393.035	367.34
sgRNA1005	SPV_0656	livF	0.0210816	0.113205	1	1	FALSE	686.903	633.584	622.715
sgRNA1006	SPV_0662	SPV_0662	-0.0272991	0.11843	1	1	FALSE	353.794	362.257	367.449
sgRNA1007	SPV_0669	rlmN	-0.252717	0.117878	1	1	FALSE	421.931	332.807	303.719
sgRNA1008	SPV_0670	SPV_0670	0.0140259	0.116176	1	1	FALSE	423.764	375.057	375.045
sgRNA1009	SPV_0671	SPV_0671	-0.120872	0.101401	1	1	FALSE	656.059	628.17	540.154
sgRNA1010	SPV_0680	SPV_0680	-0.286283	0.123673	1	1	FALSE	420.881	337.255	275.246
sgRNA1011	SPV_0682	SPV_0682	-0.137848	0.116599	1	1	FALSE	503.383	462.562	454.831
sgRNA1012	SPV_0683	SPV_0683	-0.239744	0.118051	1	1	FALSE	248.057	251.176	213.718
sgRNA1013	SPV_0690	SPV_0690	-0.137592	0.0961112	1	1	FALSE	736.225	670.778	630.086
sgRNA1014	SPV_0692	SPV_0692	0.0557927	0.150284	1	1	FALSE	410.575	377.179	381.85
sgRNA1015	SPV_0696	SPV_0696	-0.162012	0.089422	1	1	FALSE	549.969	573.248	506.964
sgRNA1016	SPV_0697	SPV_0697	0.0575664	0.0902977	1	1	FALSE	473.372	510.602	543.749
sgRNA1017	SPV_0698,SPV_0699	SPV_0698,SPV_0699	-0.179262	0.199918	1	1	FALSE	77.4891	83.7945	62.6809
sgRNA1018	SPV_0707	thiJ	0.342251	0.108996	1	1	FALSE	548.183	519.436	684.797
sgRNA1019	SPV_0713	SPV_0713	-0.865952	0.238253	1	1	FALSE	402.165	167.34	92.0713
sgRNA1020	SPV_0715	SPV_0715	0.172561	0.0998763	1	1	FALSE	380.165	381.324	417.467
sgRNA1021	SPV_0729	SPV_0729	-0.0333076	0.09874	1	1	FALSE	520.13	510.582	494.772
sgRNA1022	SPV_0730	deoD	-0.270217	0.10728	1	1	FALSE	397.676	425.259	337.549
sgRNA1023	SPV_0731	flaR	0.0159498	0.125141	1	1	FALSE	436.135	356.147	408.366
sgRNA1024	SPV_0734	SPV_0734	-0.24096	0.129136	1	1	FALSE	438.591	410.419	380.354
sgRNA1025	SPV_0736	pdp	0.0135322	0.113322	1	1	FALSE	390.737	374.507	377.225
sgRNA1026	SPV_0740	SPV_0740	0.434613	0.205793	1	1	FALSE	111.616	319.151	390.212
sgRNA1027	SPV_0741	SPV_0741	0.348538	0.197089	1	1	FALSE	141.349	276.045	356.747
sgRNA1028	SPV_0742	SPV_0742	0.430238	0.200389	1	1	FALSE	126.92	305.249	433.756
sgRNA1029	SPV_0747	SPV_0747	-0.145773	0.228798	1	1	FALSE	101.451	98.757	76.9946
sgRNA1030	SPV_1879,SPV_1880,SPV_0756	tRNA-Leu-6,tRNA-Gln-2,tRNA-Gln-1	3.02504	0.264055	1.73352e-14	4.63715e-13	TRUE	34.1462	68.2877	484.394
sgRNA1031	SPV_0758,SPV_2237,SPV_1681,SPV_2406,SPV_2275,SPV_0966	SPV_0758,SPV_2237,SPV_1681,SPV_2406,SPV_2275,SPV_0966	0.00572989	0.102829	1	1	FALSE	314.83	288.576	285.495
sgRNA1032	SPV_0773	fruA	0.0440523	0.093892	1	1	FALSE	418.004	375.872	371.909
sgRNA1033	SPV_0795	SPV_0795	0.0640703	0.0925561	1	1	FALSE	481.398	410.337	444.545
sgRNA1034	SPV_0796	SPV_0796	-0.127063	0.100082	1	1	FALSE	362.188	333.597	303.28
sgRNA1035	SPV_0797	SPV_0797	0.0388845	0.129795	1	1	FALSE	210.87	222.723	212.71
sgRNA1036	SPV_0798	SPV_0798	-0.155317	0.0922058	1	1	FALSE	602.952	547.945	467.029
sgRNA1037	SPV_0804	SPV_0804	-0.0545425	0.0932154	1	1	FALSE	325.195	341.546	325.053
sgRNA1038	SPV_0805	SPV_0805	-0.324394	0.0971567	1	1	FALSE	481.225	481.425	395.445
sgRNA1039	SPV_0806	SPV_0806	-0.311908	0.107637	1	1	FALSE	264.453	283.191	217.396
sgRNA1040	SPV_0807,SPV_1342	SPV_0807,SPV_1342	-0.122298	0.10532	1	1	FALSE	523.732	524.111	506.241
sgRNA1041	SPV_0809	cad	-0.0687847	0.132469	1	1	FALSE	322.043	335.731	324.594
sgRNA1042	SPV_0810,SPV_2248	SPV_0810,SPV_2248	0.115442	0.109941	1	1	FALSE	339.418	314.123	342.099
sgRNA1043	SPV_0811	speE	0.074947	0.0936858	1	1	FALSE	426.917	383.595	408.629
sgRNA1044	SPV_0812	lys1	0.0687639	0.110281	1	1	FALSE	434.527	431.621	415.75
sgRNA1045	SPV_0813	nspC	-0.221982	0.0837553	1	1	FALSE	607.92	599.341	515.056
sgRNA1046	SPV_0814	aguA	-0.141616	0.0753059	1	1	FALSE	832.593	777.23	700.576
sgRNA1047	SPV_0815	SPV_0815	-0.0667943	0.133759	1	1	FALSE	352.142	385.312	357.886
sgRNA1048	SPV_0821	cbpE	0.178724	0.128697	1	1	FALSE	302.031	302.572	309.629
sgRNA1049	SPV_0823	proA	-0.154613	0.101435	1	1	FALSE	335.071	421.354	380.07
sgRNA1050	SPV_0824	proC	-0.166059	0.0951549	1	1	FALSE	654.937	616.601	539.832
sgRNA1051	SPV_0826	holB	0.0508085	0.158526	1	1	FALSE	221.378	211.067	211.01
sgRNA1052	SPV_0828	SPV_0828	-0.0792815	0.0915551	1	1	FALSE	791.862	560.475	497.391
sgRNA1053	SPV_0829	SPV_0829	-0.216474	0.0824841	1	1	FALSE	925.873	818.182	720.137
sgRNA1054	SPV_0831	SPV_0831	-0.300257	0.12987	1	1	FALSE	335.75	332.807	288
sgRNA1055	SPV_0836	SPV_0836	0.856385	0.126088	1	1	FALSE	247.441	677.624	1157.76
sgRNA1056	SPV_0837	SPV_0837	0.139761	0.104437	1	1	FALSE	572.2	516.996	568.813
sgRNA1057	SPV_0841,SPV_2255	ald,SPV_2255	-0.204903	0.13027	1	1	FALSE	352.92	340.712	272.121
sgRNA1058	SPV_0849	rplT	2.1472	0.244993	2.83289e-06	4.51454e-05	TRUE	11.6201	113.834	532.778
sgRNA1059	SPV_0850	gloA	-0.214821	0.11681	1	1	FALSE	455.293	391.319	352.76
sgRNA1060	SPV_0857	era	0.265373	0.11237	1	1	FALSE	269.888	281.423	346.15
sgRNA1061	SPV_0858	mutM	-0.0530515	0.131322	1	1	FALSE	291.996	357.284	360.015
sgRNA1062	SPV_0860	pmrA	-0.0442339	0.104856	1	1	FALSE	266.451	298.814	294.003
sgRNA1063	SPV_0862	rnr	-0.104079	0.129914	1	1	FALSE	374.193	365.602	339.139
sgRNA1064	SPV_0863	smpB	-0.116432	0.165204	1	1	FALSE	284.168	245.432	239.407
sgRNA1065	SPV_0864	tehB	-0.004189	0.147241	1	1	FALSE	323.896	309.204	319.664
sgRNA1066	SPV_0870	gpmB2	-0.275223	0.08776	1	1	FALSE	491.531	412.824	335.513
sgRNA1067	SPV_0876	SPV_0876	0.411395	0.136363	1	1	FALSE	231.772	384.512	476.752
sgRNA1068	SPV_0883	SPV_0883	-0.12977	0.113858	1	1	FALSE	351.302	333.822	297.497
sgRNA1069	SPV_0884	SPV_0884	-0.281572	0.139416	1	1	FALSE	435.031	465.569	384.764
sgRNA1070	SPV_0905	bltD	1.51542	0.154107	0.00082403	0.0103731	TRUE	134.883	355.096	1037.79
sgRNA1071	SPV_0907	hemK	1.03924	0.184991	0.831998	1	FALSE	132.051	240.316	544.954
sgRNA1072	SPV_0909	SPV_0909	-0.262507	0.165894	1	1	FALSE	208.23	171.542	140.112
sgRNA1073	SPV_0910	glyA	-0.767883	0.145632	1	1	FALSE	352.379	268.949	168.758
sgRNA1074	SPV_0911	SPV_0911	-0.562235	0.142646	1	1	FALSE	620.635	350.127	258.79
sgRNA1075	SPV_0912	pvaA	-0.530105	0.296058	1	1	FALSE	202.846	79.5186	60.6457
sgRNA1076	SPV_0920	SPV_0920	0.0115224	0.114791	1	1	FALSE	304.815	257.808	268.965
sgRNA1077	SPV_0924	SPV_0924	-0.240476	0.160324	1	1	FALSE	111.532	109.844	94.0088
sgRNA1078	SPV_0925	SPV_0925	-0.197141	0.105417	1	1	FALSE	375.9	384.19	328.288
sgRNA1079	SPV_0934	SPV_0934	0.0721386	0.111214	1	1	FALSE	259.32	283.191	269.056
sgRNA1080	SPV_0935	SPV_0935	-0.25456	0.117545	1	1	FALSE	368.185	417.922	338.67
sgRNA1081	SPV_0940	rffD	0.00361459	0.128929	1	1	FALSE	267.714	272.035	280.198
sgRNA1082	SPV_0941	SPV_0941	0.0728081	0.109926	1	1	FALSE	397.969	370.723	362.991
sgRNA1083	SPV_0943	SPV_0943	-0.0359617	0.094384	1	1	FALSE	399.647	382.609	355.331
sgRNA1084	SPV_0944	SPV_0944	-0.204211	0.129418	1	1	FALSE	232.323	234.279	200.014
sgRNA1085	SPV_0945	SPV_0945	0.00171223	0.120364	1	1	FALSE	272.035	261.66	266.749
sgRNA1086	SPV_0946	SPV_0946	-0.0286431	0.185722	1	1	FALSE	68.798	76.6923	76.6011
sgRNA1087	SPV_0947	SPV_0947	-0.122129	0.123602	1	1	FALSE	164.541	154.187	136.214
sgRNA1088	SPV_0948	nikS	-0.00541142	0.0974128	1	1	FALSE	276.417	282.606	261.826
sgRNA1089	SPV_0949	SPV_0949	-0.0346418	0.0999297	1	1	FALSE	674.415	656.917	610.751
sgRNA1090	SPV_0950	mefE	-0.19838	0.0885734	1	1	FALSE	670.646	609.336	525.214
sgRNA1091	SPV_0951	SPV_0951	0.0743849	0.106534	1	1	FALSE	316.223	305.059	325.276
sgRNA1092	SPV_0955	trpY	0.184543	0.132421	1	1	FALSE	286.392	313.044	358.762
sgRNA1093	SPV_0956	SPV_0956	0.121801	0.167533	1	1	FALSE	204.238	215.531	231.165
sgRNA1094	SPV_0961	lafA	-0.130987	0.218713	1	1	FALSE	121.899	207.241	175.88
sgRNA1095	SPV_0962	SPV_0962	-0.184353	0.112631	1	1	FALSE	308.936	228.295	211.516
sgRNA1096	SPV_0968	SPV_0968	-0.278831	0.181159	1	1	FALSE	425.015	194.467	166.426
sgRNA1097	SPV_0969	SPV_0969	-0.106878	0.105058	1	1	FALSE	300.986	244.574	223.492
sgRNA1098	SPV_0977	SPV_0977	-0.140624	0.103551	1	1	FALSE	457.968	404.006	359.12
sgRNA1099	SPV_0978	SPV_0978	-0.159477	0.143778	1	1	FALSE	270.592	225.297	182.74
sgRNA1100	SPV_1641,SPV_2401,SPV_0986,SPV_2272	SPV_1641,SPV_2401,SPV_0986,SPV_2272	-0.0253165	0.102039	1	1	FALSE	331.555	319.368	315.184
sgRNA1101	SPV_0993,SPV_0992	SPV_0993,SPV_0992	-0.100564	0.104382	1	1	FALSE	393.697	378.008	363.92
sgRNA1102	SPV_0993	SPV_0993	-0.0490212	0.0907924	1	1	FALSE	506.134	561.234	510.046
sgRNA1103	SPV_1003	SPV_1003	0.0434246	0.103822	1	1	FALSE	318.639	308.375	318.288
sgRNA1104	SPV_1009	serB	-0.201942	0.121704	1	1	FALSE	227.879	205.099	183.284
sgRNA1105	SPV_1011	glxK	0.0403901	0.0985649	1	1	FALSE	281.341	274.201	279.264
sgRNA1106	SPV_1013	SPV_1013	-0.0937936	0.101089	1	1	FALSE	661.338	585.262	581.109
sgRNA1107	SPV_1021	SPV_1021	-0.134813	0.1168	1	1	FALSE	403.837	308.871	303.638
sgRNA1108	SPV_1024	lplA	-0.094677	0.108969	1	1	FALSE	369.401	369.718	343.268
sgRNA1109	SPV_1025	acoL	-0.249502	0.109071	1	1	FALSE	262.083	290.915	240.457
sgRNA1110	SPV_1026	acoC	-0.158843	0.119885	1	1	FALSE	371.549	386.297	351.596
sgRNA1111	SPV_1027	acoB	-0.0971314	0.098952	1	1	FALSE	345.038	353.968	332.712
sgRNA1112	SPV_1029	pdrM	-0.185183	0.133611	1	1	FALSE	260.213	251.381	213.228
sgRNA1113	SPV_1046	lacG-2	-0.0153194	0.127884	1	1	FALSE	147.792	134.669	146.134
sgRNA1114	SPV_1047	lacE-2	-0.0151635	0.119068	1	1	FALSE	270.359	286.957	291.645
sgRNA1115	SPV_1048	lacF-2	-0.166274	0.117958	1	1	FALSE	441.567	393.035	355.804
sgRNA1116	SPV_1049	lacT	-0.200978	0.116692	1	1	FALSE	294.113	288.576	282.332
sgRNA1117	SPV_1054	SPV_1054	-0.0808125	0.0864329	1	1	FALSE	695.653	623.879	576.879
sgRNA1118	SPV_1057,SPV_0560,SPV_0561,SPV_0562	SPV_1057,SPV_0560,SPV_0561,bgaA	-0.101794	0.0796447	1	1	FALSE	584.321	580.113	539.163
sgRNA1119	SPV_1059	SPV_1059	-0.0473446	0.114139	1	1	FALSE	365.484	359.116	353.649
sgRNA1120	SPV_1061	pphA	0.219489	0.170498	1	1	FALSE	276.008	256.15	257.838
sgRNA1121	SPV_1062	recN	1.79653	0.157795	4.46807e-07	7.43685e-06	TRUE	67.3449	235.33	872.003
sgRNA1122	SPV_1063	ahrC	0.263869	0.114849	1	1	FALSE	288.242	416.969	512.336
sgRNA1123	SPV_1066	xseB	0.339385	0.141862	1	1	FALSE	203.667	204.754	280.439
sgRNA1124	SPV_1069	SPV_1069	-0.196528	0.142741	1	1	FALSE	176.471	176.993	143.956
sgRNA1125	SPV_1070	truB	-0.0674625	0.143111	1	1	FALSE	237.604	280.19	276.771
sgRNA1126	SPV_1071	SPV_1071	-0.0488642	0.126692	1	1	FALSE	252.747	260.079	240.6
sgRNA1127	SPV_1076	srtA	0.395593	0.179949	1	1	FALSE	378.859	567.589	719.227
sgRNA1128	SPV_1092	SPV_1092	-0.249115	0.20026	1	1	FALSE	77.9491	77.234	60.3969
sgRNA1129	SPV_1094,SPV_1095	SPV_1094,SPV_1095	-0.0309489	0.0976331	1	1	FALSE	502.728	492.49	463.198
sgRNA1130	SPV_1095	SPV_1095	-0.286156	0.111826	1	1	FALSE	348.276	336.186	288.128
sgRNA1131	SPV_1102	SPV_1102	0.445483	0.183839	1	1	FALSE	71.5855	268.603	393.418
sgRNA1132	SPV_1103	SPV_1103	0.518398	0.124062	1	1	FALSE	64.4923	338.217	479.358
sgRNA1133	SPV_1108	SPV_1108	-0.015505	0.105794	1	1	FALSE	287.386	270.356	273.427
sgRNA1134	SPV_1109	SPV_1109	-0.215721	0.135232	1	1	FALSE	523.808	553.656	516.371
sgRNA1135	SPV_1110	SPV_1110	-0.0420108	0.144363	1	1	FALSE	267.401	272.729	258.002
sgRNA1136	SPV_1111	SPV_1111	-0.127164	0.109801	1	1	FALSE	377.755	368.094	318.507
sgRNA1137	SPV_1112	SPV_1112	-0.0359755	0.0964885	1	1	FALSE	609.814	578.656	571.132
sgRNA1138	SPV_1113	SPV_1113	-0.00395706	0.140619	1	1	FALSE	548.677	501.523	499.991
sgRNA1139	SPV_1115	leuB	-0.128619	0.106495	1	1	FALSE	461.661	328.27	312.824
sgRNA1140	SPV_1116,SPV_2313	leuA,SPV_2313	-0.136018	0.114822	1	1	FALSE	409.052	455.952	413.179
sgRNA1141	SPV_1117	SPV_1117	-0.284743	0.129325	1	1	FALSE	237.195	216.255	179.632
sgRNA1142	SPV_1130	licD2	-0.445944	0.146002	1	1	FALSE	571.202	261.66	185.458
sgRNA1143	SPV_1135	nth	-0.312408	0.154714	1	1	FALSE	174.256	176.569	146.447
sgRNA1144	SPV_1137	SPV_1137	-0.0668817	0.0948184	1	1	FALSE	639.145	654.772	589.52
sgRNA1145	SPV_1147	tRNA-Arg-2	-0.241917	0.108385	1	1	FALSE	340.437	333.034	287.738
sgRNA1146	SPV_1155	efeU	-0.0449574	0.127898	1	1	FALSE	524.432	541.049	482.901
sgRNA1147	SPV_1156	efeB	-0.0391091	0.111399	1	1	FALSE	318.511	290.056	276.19
sgRNA1148	SPV_1159	SPV_1159	-0.0975671	0.103087	1	1	FALSE	497.906	503.181	465.183
sgRNA1149	SPV_1160	SPV_1160	-0.117107	0.137324	1	1	FALSE	269.274	257.794	234.089
sgRNA1150	SPV_1162	SPV_1162	0.0484229	0.101457	1	1	FALSE	433.491	416.03	403.378
sgRNA1151	SPV_1164	cdd-2	0.0612024	0.104969	1	1	FALSE	258.88	248.816	260.027
sgRNA1152	SPV_1165	SPV_1165	0.179721	0.112744	1	1	FALSE	360.904	315.801	364.941
sgRNA1153	SPV_1166	SPV_1166	0.015223	0.104427	1	1	FALSE	386.709	354.941	344.649
sgRNA1154	SPV_1167	appD	-0.0999961	0.0893979	1	1	FALSE	498.956	473.812	435.404
sgRNA1155	SPV_1168	appC	-0.0954377	0.116491	1	1	FALSE	344.097	287.482	273.471
sgRNA1156	SPV_1169	appB	-0.125057	0.108731	1	1	FALSE	329.967	259.466	236.478
sgRNA1157	SPV_1174	SPV_1174	-0.0510383	0.153728	1	1	FALSE	241.694	199.78	196.567
sgRNA1158	SPV_1175	SPV_1175	0.0684175	0.157296	1	1	FALSE	215.191	207.774	205.616
sgRNA1159	SPV_1176	SPV_1176	-0.172206	0.158225	1	1	FALSE	184.384	188.536	164.596
sgRNA1160	SPV_1177	SPV_1177	-0.071008	0.0927231	1	1	FALSE	550.457	520.037	503.118
sgRNA1161	SPV_1178	ptrB	-0.0656257	0.16801	1	1	FALSE	155.57	141.596	148.444
sgRNA1162	SPV_1179	lanL	-0.0955452	0.107491	1	1	FALSE	292.829	310.672	282.841
sgRNA1163	SPV_1186	SPV_1186	-0.0638481	0.144641	1	1	FALSE	226.138	241.107	203.139
sgRNA1164	SPV_1189	SPV_1189	0.168262	0.103601	1	1	FALSE	294.626	276.326	300.502
sgRNA1165	SPV_1191	SPV_1191	-0.039513	0.0881523	1	1	FALSE	583.746	544.664	537.116
sgRNA1166	SPV_1192	SPV_1192	0.00741823	0.162124	1	1	FALSE	158.784	152.334	160.519
sgRNA1167	SPV_1206	SPV_1206	-0.242158	0.119312	1	1	FALSE	532.046	435.206	384.794
sgRNA1168	SPV_1207	tyrA	-0.124341	0.121891	1	1	FALSE	400.244	339.337	297.5
sgRNA1169	SPV_1208	aroC	-0.119889	0.209761	1	1	FALSE	165.479	135.589	135.701
sgRNA1170	SPV_1209	aroB	-0.299957	0.124503	1	1	FALSE	435.086	383.399	326.674
sgRNA1171	SPV_1210	aroE	-0.183324	0.120786	1	1	FALSE	166.331	169.938	152.944
sgRNA1172	SPV_1211	aroD	-0.152626	0.101606	1	1	FALSE	210.232	244.544	226.837
sgRNA1173	SPV_1223	SPV_1223	-0.049428	0.126952	1	1	FALSE	186.023	172.332	152.352
sgRNA1174	SPV_1225	SPV_1225	0.0342223	0.116933	1	1	FALSE	403.304	365.218	379.417
sgRNA1175	SPV_1227	phoU2	-0.476009	0.103212	1	1	FALSE	504.686	412.824	292.01
sgRNA1176	SPV_1228	pstB2-2	0.482839	0.222381	1	1	FALSE	45.7278	68.804	90.0913
sgRNA1177	SPV_1229	pstB2-1	0.434106	0.097097	1	1	FALSE	270.204	369.377	516.366
sgRNA1178	SPV_1230	pstA2	0.196372	0.114631	1	1	FALSE	369.988	516.996	570.235
sgRNA1179	SPV_1231	pstC2	0.394535	0.152866	1	1	FALSE	259.478	371.376	452.817
sgRNA1180	SPV_1232	pstS2	0.373331	0.107692	1	1	FALSE	373.713	482.283	597.867
sgRNA1181	SPV_1233	SPV_1233	0.00975274	0.148234	1	1	FALSE	176.861	128.723	121.85
sgRNA1182	SPV_1237	SPV_1237	0.0845841	0.100479	1	1	FALSE	351.953	334.084	347.469
sgRNA1183	SPV_1241	SPV_1241	-0.0197002	0.186759	1	1	FALSE	175.124	148.385	151.023
sgRNA1184	SPV_1242	SPV_1242	0.0736981	0.120162	1	1	FALSE	247.734	248.987	247.613
sgRNA1185	SPV_1248	cbpM	-0.218737	0.181219	1	1	FALSE	123.159	111.583	96.96
sgRNA1186	SPV_1252	SPV_1252	-0.0978358	0.145898	1	1	FALSE	200.54	189.819	182.599
sgRNA1187	SPV_1253	SPV_1253	-0.19523	0.142227	1	1	FALSE	254.844	262.645	213.82
sgRNA1188	SPV_1254	SPV_1254	-0.089854	0.116801	1	1	FALSE	345.931	358.894	337.521
sgRNA1189	SPV_1255	SPV_1255	0.134042	0.101845	1	1	FALSE	335.541	322.666	353.541
sgRNA1190	SPV_1256,SPV_1258	SPV_1256,SPV_1258	-0.0798867	0.121909	1	1	FALSE	498.329	478.851	486.346
sgRNA1191	SPV_1257	SPV_1257	-0.155999	0.126815	1	1	FALSE	226.098	196.518	172.259
sgRNA1192	SPV_1261	SPV_1261	0.126482	0.119322	1	1	FALSE	340.923	300.914	337.283
sgRNA1193	SPV_1263	SPV_1263	-0.166611	0.111231	1	1	FALSE	348.511	383.399	358.157
sgRNA1194	SPV_1264	SPV_1264	-0.0101337	0.115658	1	1	FALSE	339.345	347.336	337.466
sgRNA1195	SPV_1265	SPV_1265	0.0319247	0.114763	1	1	FALSE	442.074	392.886	405.07
sgRNA1196	SPV_1266	SPV_1266	0.0541012	0.109126	1	1	FALSE	310.658	295.111	308.043
sgRNA1197	SPV_1267	SPV_1267	-0.356569	0.137402	1	1	FALSE	319.533	332.183	251.154
sgRNA1198	SPV_1272	SPV_1272	-0.317966	0.111735	1	1	FALSE	397.503	343.262	295.972
sgRNA1199	SPV_1275	nagR	-0.0491189	0.120473	1	1	FALSE	245.138	234.708	226.778
sgRNA1200	SPV_1276	SPV_1276	-0.297269	0.0810756	1	1	FALSE	757.619	651.34	526.499
sgRNA1201	SPV_1277	SPV_1277	-0.10942	0.0899762	1	1	FALSE	644.221	562.06	522.291
sgRNA1202	SPV_1279	SPV_1279	0.0797076	0.0928234	1	1	FALSE	614.801	613.581	636.842
sgRNA1203	SPV_1284	SPV_1284	0.0186882	0.124184	1	1	FALSE	262.228	254.492	266.864
sgRNA1204	SPV_1296	pdxT	-0.159784	0.116208	1	1	FALSE	265.724	243.716	215.943
sgRNA1205	SPV_1297	pdxS	-0.195437	0.0847715	1	1	FALSE	730.736	751.744	636.834
sgRNA1206	SPV_1299	SPV_1299	-0.112953	0.129477	1	1	FALSE	200.249	179.056	162.235
sgRNA1207	SPV_1312	yfmL	-0.150035	0.114221	1	1	FALSE	489.181	415.549	407.793
sgRNA1208	SPV_2155,SPV_0359,SPV_2179,SPV_0499,SPV_1315,SPV_2347,SPV_1421,SPV_2361,SPV_0743,SPV_2229	SPV_2155,SPV_0359,SPV_2179,SPV_0499,SPV_1315,SPV_2347,SPV_1421,SPV_2361,SPV_0743,SPV_2229	0.0410352	0.134125	1	1	FALSE	196.517	212.905	225.128
sgRNA1209	SPV_1319	SPV_1319	-0.171716	0.101412	1	1	FALSE	412.374	397.326	340.938
sgRNA1210	SPV_1321,SPV_1322	mucB,SPV_1322	0.0587234	0.112526	1	1	FALSE	335.235	328.673	326.326
sgRNA1211	SPV_1322	SPV_1322	-0.145065	0.118428	1	1	FALSE	384.673	384.98	332.723
sgRNA1212	SPV_1323	SPV_1323	0.0235793	0.129923	1	1	FALSE	299.583	266.772	264.04
sgRNA1213	SPV_1343	SPV_1343	0.0129738	0.134499	1	1	FALSE	296.973	277.703	308.566
sgRNA1214	SPV_1344	SPV_1344	0.126943	0.140009	1	1	FALSE	234.954	168.38	184.686
sgRNA1215	SPV_1347	SPV_1347	-0.166712	0.127693	1	1	FALSE	258.8	182.123	168.418
sgRNA1216	SPV_1348	SPV_1348	1.84478	0.568018	0.136953	1	FALSE	0.800922	3.95257	27.8685
sgRNA1217	SPV_1361,SPV_2355	SPV_1361,SPV_2355	-0.164578	0.124188	1	1	FALSE	272.66	296.264	287.974
sgRNA1218	SPV_1362	SPV_1362	0.0235513	0.113893	1	1	FALSE	321.935	272.729	293.185
sgRNA1219	SPV_1372	SPV_1372	3.99364	0.35596	4.09862e-17	1.27911e-15	TRUE	8.7853	32.568	558.037
sgRNA1220	SPV_1376	pclA	-0.0388762	0.133735	1	1	FALSE	245.678	217.971	236.17
sgRNA1221	SPV_1377	mga1	0.202678	0.144607	1	1	FALSE	166.448	137.626	166.395
sgRNA1222	SPV_1393	SPV_1393	0.283408	0.159101	1	1	FALSE	241.33	418.78	493.099
sgRNA1223	SPV_1397	aldR	0.21895	0.108408	1	1	FALSE	342.617	423.384	498.885
sgRNA1224	SPV_1400	SPV_1400	-0.0544332	0.168161	1	1	FALSE	84.5858	143.411	125.265
sgRNA1225	SPV_1414	oxlT	-0.0940125	0.120911	1	1	FALSE	223.522	235.991	218.758
sgRNA1226	SPV_1425	SPV_1425	-0.133217	0.125583	1	1	FALSE	454.187	402.475	375.741
sgRNA1227	SPV_1426	SPV_1426	-0.212327	0.12726	1	1	FALSE	352.211	286.808	270.455
sgRNA1228	SPV_1433	SPV_1433	-0.0671631	0.166749	1	1	FALSE	218.139	241.897	224.33
sgRNA1229	SPV_1434	ybgI	0.542192	0.13706	1	1	FALSE	195.518	460.87	718.739
sgRNA1230	SPV_1440	SPV_1440	-0.113383	0.106974	1	1	FALSE	816.774	815.247	750.571
sgRNA1231	SPV_1441	SPV_1441	-0.168977	0.141938	1	1	FALSE	199.388	191.304	173.978
sgRNA1232	SPV_1454	SPV_1454	-0.110903	0.153488	1	1	FALSE	173.855	176.569	154.716
sgRNA1233	SPV_1457	dtd	-0.104216	0.125557	1	1	FALSE	366.557	373.224	351.328
sgRNA1234	SPV_1465	SPV_1465	-0.0936204	0.164557	1	1	FALSE	168.626	183.399	179.389
sgRNA1235	SPV_1469	SPV_1469	-0.0143523	0.106542	1	1	FALSE	351.42	387.955	379.924
sgRNA1236	SPV_1475	ylmH	2.53308	0.275867	2.73976e-08	4.77227e-07	TRUE	20.2468	48.3267	246.756
sgRNA1237	SPV_1476	ylmG	2.6736	0.378159	9.61546e-06	0.000142613	TRUE	28.0409	92.4511	483.302
sgRNA1238	SPV_1477	sepF	2.53165	0.297333	2.58691e-07	4.35414e-06	TRUE	12.7971	29.4162	184.616
sgRNA1239	SPV_1478	ylmE	-0.212288	0.129221	1	1	FALSE	704.066	347.336	312.44
sgRNA1240	SPV_1482	SPV_1482	-0.40274	0.299975	1	1	FALSE	79.0597	64.0854	48.4227
sgRNA1241	SPV_1488	nanK	-0.117825	0.121112	1	1	FALSE	476.52	474.168	448.628
sgRNA1242	SPV_1490	SPV_1490	-0.154435	0.141344	1	1	FALSE	235.917	219.571	209.475
sgRNA1243	SPV_1491	SPV_1491	-0.00382208	0.115946	1	1	FALSE	588.957	555.732	578.264
sgRNA1244	SPV_1492	yjgK	-0.00040415	0.100368	1	1	FALSE	424.159	401.322	399.83
sgRNA1245	SPV_1493	satC	0.0763268	0.19053	1	1	FALSE	142.7	155.326	142.675
sgRNA1246	SPV_1494	satB	-0.003475	0.122671	1	1	FALSE	360.485	356.455	369.092
sgRNA1247	SPV_1495	satA	-0.328175	0.153357	1	1	FALSE	372.925	275.89	213.61
sgRNA1248	SPV_1496	nanP	-0.121358	0.141208	1	1	FALSE	309.276	234.279	207.407
sgRNA1249	SPV_1497	nanE-1	0.0891441	0.140443	1	1	FALSE	132.931	112.412	117.236
sgRNA1250	SPV_1498	SPV_1498	-0.117259	0.117731	1	1	FALSE	546.341	519.761	483.921
sgRNA1251	SPV_1499	nanB	-0.242648	0.123174	1	1	FALSE	434.497	437.693	355.517
sgRNA1252	SPV_1500	SPV_1500	-0.256051	0.2229	1	1	FALSE	66.0623	61.6601	43.7118
sgRNA1253	SPV_1501	ycjO	0.0224015	0.0867279	1	1	FALSE	599.169	640.854	619.422
sgRNA1254	SPV_1502	SPV_1502	-0.0322775	0.101245	1	1	FALSE	591.203	526.483	523.683
sgRNA1255	SPV_1503	SPV_1503	-0.0849348	0.119385	1	1	FALSE	334.208	307.546	272.046
sgRNA1256	SPV_1507	recG	-0.405583	0.122555	1	1	FALSE	423.845	383.399	288.853
sgRNA1257	SPV_1510	aroF	0.601092	0.284505	1	1	FALSE	15.4311	67.9751	110.095
sgRNA1258	SPV_1511	aroG	0.171618	0.356445	1	1	FALSE	10.9783	25.7447	33.5219
sgRNA1259	SPV_1513,SPV_2380	SPV_1513,SPV_2380	-0.0318169	0.0948975	1	1	FALSE	469.607	456.127	448.445
sgRNA1260	SPV_1514	SPV_1514	0.0578817	0.155358	1	1	FALSE	239.445	241.229	225.71
sgRNA1261	SPV_1515	SPV_1515	0.00768451	0.0914988	1	1	FALSE	473.633	461.205	448.174
sgRNA1262	SPV_1516	SPV_1516	0.00344225	0.0800001	1	1	FALSE	683.419	701.186	673.575
sgRNA1263	SPV_1517	SPV_1517	-0.103943	0.0822222	1	1	FALSE	523.04	491.576	457.517
sgRNA1264	SPV_1520	frp	1.29252	0.163199	0.0730673	0.760103	FALSE	31.1979	97.8178	247.517
sgRNA1265	SPV_1529,SPV_2385	SPV_1529,SPV_2385	-0.0677064	0.084423	1	1	FALSE	636.565	617.578	569.52
sgRNA1266	SPV_1533	SPV_1533	0.270832	0.131032	1	1	FALSE	177.287	190.51	216.164
sgRNA1267	SPV_1539,SPV_2387	SPV_1539,SPV_2387	-0.182925	0.0981897	1	1	FALSE	600.642	526.907	475.349
sgRNA1268	SPV_1540	SPV_1540	-0.21139	0.104313	1	1	FALSE	601.71	561.265	449.881
sgRNA1269	SPV_1544	sun	-0.0315521	0.0907389	1	1	FALSE	363.954	348.165	348.602
sgRNA1270	SPV_1552	SPV_1552	1.28709	0.159564	0.0719891	0.754124	FALSE	196.6	505.328	1243.12
sgRNA1271	SPV_1553	SPV_1553	0.981	0.131594	1	1	FALSE	243.712	559.684	1032.24
sgRNA1272	SPV_1554	rsfA	0.624716	0.116977	1	1	FALSE	353.357	583.072	888.819
sgRNA1273	SPV_1564	SPV_1564	0.279123	0.133039	1	1	FALSE	449.327	451.786	592.183
sgRNA1274	SPV_1568	queF	-0.101633	0.107035	1	1	FALSE	496.31	354.797	327.088
sgRNA1275	SPV_1570	SPV_1570	0.139521	0.140082	1	1	FALSE	202.354	205.583	218.127
sgRNA1276	SPV_1571	pepF2	-0.186191	0.102907	1	1	FALSE	361.307	331.983	304.868
sgRNA1277	SPV_1572	SPV_1572	-0.28427	0.109186	1	1	FALSE	613.434	631.019	577.518
sgRNA1278	SPV_1573	prmA	-0.0343216	0.112096	1	1	FALSE	456.661	503.228	511.937
sgRNA1279	SPV_1574,SPV_1575	SPV_1574,SPV_1575	0.0931134	0.103883	1	1	FALSE	298.625	336.56	363.634
sgRNA1280	SPV_1575	SPV_1575	0.0519655	0.113476	1	1	FALSE	388.519	416.205	415.256
sgRNA1281	SPV_1577	hicB	-0.00110641	0.115823	1	1	FALSE	332.162	355.269	333.474
sgRNA1282	SPV_1587	mga2	-0.0642159	0.11614	1	1	FALSE	303.596	276.68	261.237
sgRNA1283	SPV_1605	SPV_1605	0.265519	0.109077	1	1	FALSE	185.997	255.73	315.9
sgRNA1284	SPV_1618	SPV_1618	0.126972	0.12993	1	1	FALSE	305.176	306.769	324.515
sgRNA1285	SPV_1621	SPV_1621	0.408441	0.354006	1	1	FALSE	832.893	851.619	993.743
sgRNA1286	SPV_1622	SPV_1622	0.2145	0.289269	1	1	FALSE	867.548	922.409	987.079
sgRNA1287	SPV_1627	SPV_1627	0.0850357	0.120517	1	1	FALSE	321.478	309.882	315.503
sgRNA1288	SPV_1633	galT-2	-0.028474	0.139201	1	1	FALSE	235.334	241.897	223.289
sgRNA1289	SPV_1634	galK	0.0815388	0.180741	1	1	FALSE	293.159	274.61	277.941
sgRNA1290	SPV_1639	sczA	3.23471	0.192839	4.71433e-31	5.88505e-29	TRUE	12.4055	93.5016	909.745
sgRNA1291	SPV_1640	pnuC	-0.136557	0.104369	1	1	FALSE	413.984	406.324	354.444
sgRNA1292	SPV_1648	SPV_1648	0.0321581	0.0901323	1	1	FALSE	609.973	649.012	638.404
sgRNA1293	SPV_1653	yidD	-0.0913834	0.0990288	1	1	FALSE	719.837	658.498	612.009
sgRNA1294	SPV_1654	rluB	-0.379692	0.12387	1	1	FALSE	652.912	541.049	375.927
sgRNA1295	SPV_1657	xerD	-0.161101	0.116289	1	1	FALSE	543.588	378.209	330.952
sgRNA1296	SPV_1664	treP	-0.0558967	0.0873376	1	1	FALSE	542.432	555.732	514.024
sgRNA1297	SPV_1667	amiF	2.39738	0.196584	1.17471e-12	2.74956e-11	TRUE	68.2756	404.473	2298.8
sgRNA1298	SPV_1668	amiE	2.40214	0.172113	3.74251e-16	1.12125e-14	TRUE	69.9101	586.224	2892.72
sgRNA1299	SPV_1669	amiD	2.23113	0.169482	3.75559e-13	9.074e-12	TRUE	35.2048	243.735	1108.41
sgRNA1300	SPV_1670	amiC	2.27948	0.181261	1.68026e-12	3.81367e-11	TRUE	59.9402	428.637	2107.97
sgRNA1301	SPV_1673	gtfA	-0.124175	0.119682	1	1	FALSE	260.319	222.925	202.744
sgRNA1302	SPV_0552,SPV_2196,SPV_1674,SPV_1942,SPV_1949,SPV_1939,SPV_0690	SPV_0552,SPV_2196,SPV_1674,SPV_1942,SPV_1949,SPV_1939,SPV_0690	1.69903	0.158419	1.02158e-05	0.000150031	TRUE	183.014	621.943	2043.97
sgRNA1303	SPV_1675	msmG	0.0948071	0.0917988	1	1	FALSE	450.659	421.283	453.86
sgRNA1304	SPV_1676	msmF	-0.166659	0.10225	1	1	FALSE	488.5	485.376	417.234
sgRNA1305	SPV_1677	msmE	-0.196936	0.130904	1	1	FALSE	583.717	376.108	345.588
sgRNA1306	SPV_1678	agaN	-0.207323	0.114451	1	1	FALSE	349.523	296.064	259.632
sgRNA1307	SPV_1697,SPV_1811	tRNA-Asp-1,tRNA-Asp-2	3.16002	0.373538	7.35547e-09	1.32753e-07	TRUE	25.8443	80.8012	568.458
sgRNA1308	SPV_1698,SPV_1812,SPV_1889	tRNA-Val-1,tRNA-Val-2,tRNA-Val-3	1.1415	0.17991	0.431584	1	FALSE	177.465	391.866	784.426
sgRNA1309	SPV_1707	SPV_1707	-0.115584	0.168336	1	1	FALSE	128.248	111.361	116.033
sgRNA1310	SPV_0048,SPV_1708,SPV_2403,SPV_1666,SPV_2400,SPV_2271	SPV_0048,SPV_1708,SPV_2403,SPV_1666,SPV_2400,SPV_2271	-0.0855841	0.105683	1	1	FALSE	337.083	318.376	310.921
sgRNA1311	SPV_1712	ydfG	-0.0508421	0.0969913	1	1	FALSE	526.211	485.376	446.936
sgRNA1312	SPV_1713	SPV_1713	-0.123293	0.125357	1	1	FALSE	190.004	193.676	181.59
sgRNA1313	SPV_1714	SPV_1714	0.0934646	0.0962822	1	1	FALSE	395.758	413.929	436.498
sgRNA1314	SPV_1731	SPV_1731	-0.119226	0.0992164	1	1	FALSE	470.744	461.688	435.143
sgRNA1315	SPV_1732,SPV_2416,SPV_1733	SPV_1732,SPV_2416,SPV_1733	-0.105074	0.120697	1	1	FALSE	441.876	419.396	395.95
sgRNA1316	SPV_1736	SPV_1736	-0.249739	0.135636	1	1	FALSE	316.167	303.966	244.142
sgRNA1317	SPV_1762	endA	0.253228	0.128828	1	1	FALSE	211.238	210.34	271.509
sgRNA1318	SPV_1763	epuA	0.129606	0.141578	1	1	FALSE	202.287	239.838	262.914
sgRNA1319	SPV_1775	lysA	0.0681803	0.146363	1	1	FALSE	129.336	118.716	124.013
sgRNA1320	SPV_1786	SPV_1786	-0.279265	0.111132	1	1	FALSE	491.607	530.979	435.648
sgRNA1321	SPV_1789	diiA	-0.0691534	0.109948	1	1	FALSE	384.043	363.501	360.059
sgRNA1322	SPV_1795	SPV_1795	-0.176611	0.123541	1	1	FALSE	483.615	367.231	333.467
sgRNA1323	SPV_1826	nadC	-0.090514	0.105769	1	1	FALSE	384.464	337.236	334.306
sgRNA1324	SPV_1836	SPV_1836	0.232153	0.140872	1	1	FALSE	404.486	552.652	631.466
sgRNA1325	SPV_1837	SPV_1837	0.0826129	0.127412	1	1	FALSE	504.909	687.747	753.683
sgRNA1326	SPV_1842	ulaF	-0.0686254	0.131854	1	1	FALSE	282.54	289.96	276.519
sgRNA1327	SPV_1843	ulaE	0.152552	0.106148	1	1	FALSE	450.259	423.716	458.686
sgRNA1328	SPV_1844	ulaD	-0.12482	0.107367	1	1	FALSE	543.194	535.969	493.946
sgRNA1329	SPV_1845	ulaC	0.0942646	0.089372	1	1	FALSE	564.178	531.198	567.993
sgRNA1330	SPV_1846	ulaB	-0.146544	0.111624	1	1	FALSE	288.294	258.305	234.163
sgRNA1331	SPV_1847	ulaA	-0.0846047	0.103447	1	1	FALSE	485.349	450.957	438.828
sgRNA1332	SPV_1848	SPV_1848	-0.1569	0.0880923	1	1	FALSE	499.557	491.22	445.09
sgRNA1333	SPV_1850	yidC2	2.58465	0.14721	5.05913e-27	3.98872e-25	TRUE	126.746	693.383	3799.19
sgRNA1334	SPV_1852	SPV_1852	-0.196585	0.150609	1	1	FALSE	227.495	264.312	240.991
sgRNA1335	SPV_1868	tgt	0.0459328	0.176313	1	1	FALSE	108.848	102.767	94.0101
sgRNA1336	SPV_1873	SPV_1873	-0.058804	0.101572	1	1	FALSE	411.793	417.063	400.681
sgRNA1337	SPV_1875	SPV_1875	-0.0759991	0.121964	1	1	FALSE	220.338	207.241	202.39
sgRNA1338	SPV_1876	SPV_1876	0.117608	0.119895	1	1	FALSE	166.418	161.333	176.323
sgRNA1339	SPV_1882	tRNA-Trp-1	2.55199	0.219411	1.5113e-12	3.48298e-11	TRUE	24.634	196.458	1051.2
sgRNA1340	SPV_1883,SPV_0755	tRNA-Tyr-2,tRNA-Tyr-1	3.99706	0.318115	4.45443e-21	2.02204e-19	TRUE	29.0034	133.386	1692.11
sgRNA1341	SPV_1682,SPV_1683,SPV_1684,SPV_1685,SPV_1884	tRNA-Ser-2,tRNA-Ile-1,tRNA-Gly-1,tRNA-Phe-1,tRNA-Phe-2	0.673579	0.139394	1	1	FALSE	224.993	382.609	595.783
sgRNA1342	SPV_1682,SPV_1683,SPV_1684,SPV_1685,SPV_1686,SPV_1885	tRNA-Ser-2,tRNA-Ile-1,tRNA-Gly-1,tRNA-Phe-1,tRNA-fMet-1,tRNA-fMet-2	2.52044	0.173137	1.61024e-18	5.88326e-17	TRUE	19.9627	135.525	634.964
sgRNA1343	SPV_1682,SPV_1683,SPV_1684,SPV_1685,SPV_1686,SPV_1687,SPV_1886	tRNA-Ser-2,tRNA-Ile-1,tRNA-Gly-1,tRNA-Phe-1,tRNA-fMet-1,tRNA-Ser-3,tRNA-Ser-4	2.21367	0.190216	1.76515e-10	3.43402e-09	TRUE	42.3139	236.381	867.257
sgRNA1344	SPV_1682,SPV_1683,SPV_1684,SPV_1888	tRNA-Ser-2,tRNA-Ile-1,tRNA-Gly-1,tRNA-Gly-4	3.07113	0.190291	1.3734e-27	1.28585e-25	TRUE	35.576	64.0854	499.312
sgRNA1345	SPV_1895	SPV_1895	2.71919	0.162051	2.709e-26	1.84458e-24	TRUE	43.2144	246.886	1805.03
sgRNA1346	SPV_1900	patB	-0.00502126	0.0796124	1	1	FALSE	693.778	627.171	617.02
sgRNA1347	SPV_1903	hexA	-0.205756	0.107533	1	1	FALSE	553.049	562.092	477.459
sgRNA1348	SPV_1906,SPV_1967	SPV_1906,SPV_1967	-0.0408942	0.100321	1	1	FALSE	592.059	578.87	585.309
sgRNA1349	SPV_1907	SPV_1907	-0.0923502	0.102543	1	1	FALSE	415.779	386.297	367.006
sgRNA1350	SPV_1910	pstS1	-0.187147	0.100523	1	1	FALSE	512.118	532.056	473.118
sgRNA1351	SPV_1911	pstC1	0.0197158	0.116789	1	1	FALSE	572.886	511.463	509.339
sgRNA1352	SPV_1912	pstA1	-0.0615306	0.122143	1	1	FALSE	299.831	279.454	275.437
sgRNA1353	SPV_1913	pstB1	0.0102563	0.117405	1	1	FALSE	300.576	296.271	306.753
sgRNA1354	SPV_1914	phoU1	0.0987452	0.105847	1	1	FALSE	314.131	295.94	321.939
sgRNA1355	SPV_1915,SPV_2435	SPV_1915,SPV_2435	0.0136495	0.106514	1	1	FALSE	324.293	272.035	287.467
sgRNA1356	SPV_1916	SPV_1916	0.0929422	0.185083	1	1	FALSE	122.895	115.43	130.428
sgRNA1357	SPV_1917	SPV_1917	1.19054	0.216169	0.378079	1	FALSE	150.244	353.986	690.004
sgRNA1358	SPV_1920	SPV_1920	-0.126608	0.111277	1	1	FALSE	357.557	344.849	326.439
sgRNA1359	SPV_1921	SPV_1921	-0.0855623	0.12286	1	1	FALSE	447.954	465.569	426.62
sgRNA1360	SPV_1922	hipO	2.71413	0.178597	8.16894e-22	3.94744e-20	TRUE	76.194	264.746	1640.22
sgRNA1361	SPV_1930	SPV_1930	0.0786243	0.100322	1	1	FALSE	385.857	397.119	410.583
sgRNA1362	SPV_1931	SPV_1931	-0.148868	0.136074	1	1	FALSE	202.478	211.386	189.054
sgRNA1363	SPV_1935	malC	0.0520996	0.145398	1	1	FALSE	402.207	378.837	390.656
sgRNA1364	SPV_1936	malD	-0.149391	0.138733	1	1	FALSE	369.382	356.134	325.005
sgRNA1365	SPV_1944	SPV_1944	-0.0301823	0.132356	1	1	FALSE	256.244	243.686	238.894
sgRNA1366	SPV_1945	SPV_1945	-0.175347	0.165188	1	1	FALSE	92.4887	99.6048	89.5009
sgRNA1367	SPV_1946	SPV_1946	0.0656265	0.146954	1	1	FALSE	289.024	315.174	291.361
sgRNA1368	SPV_1947	SPV_1947	-0.151813	0.0951412	1	1	FALSE	454.382	464.286	436.059
sgRNA1369	SPV_1953	SPV_1953	-0.267017	0.100906	1	1	FALSE	287.337	308.301	247.454
sgRNA1370	SPV_2177,SPV_1955,SPV_0433	SPV_2177,SPV_1955,SPV_0433	0.0148626	0.100995	1	1	FALSE	555.441	544.2	565.899
sgRNA1371	SPV_1957	tktC	-0.0330875	0.118732	1	1	FALSE	257.54	248.865	239.14
[truncated: 128 more rows]

## Sheet: Min_vs_Middle_significant
sgRNA	target_operon_locus_tags	target_operon_names	log2FoldChange	lfcSE	pvalue	padj	significant	normcts_median_FSCMax	normcts_median_FSCMiddle	normcts_median_FSCMin
[truncated: 125 more rows]

[truncated: 3 more sheets: Max_vs_Min, Max_vs_Min_significant, Column_legends]
