# Supplementary material for: Amoxicillin-resistant Streptococcus pneumoniae can be resensitized by targeting the mevalonate pathway as indicated by sCRilecs-seq
Source: eLife. 2022 Jun 24;11:e75607. doi: 10.7554/eLife.75607 (PMC9363119; doi:10.7554/eLife.75607)
Supplement: Supplementary file 4. [file elife-75607-supp4.xlsx]

## Sheet: Max_vs_Middle_EnrichedHits
GO enrichment analysis
Input = genes corresponding to sgRNAs that are significantly enriched in the FSCMax versus FSCMiddle population
Interpretation = Depletion of these genes leads to larger cell sizes
Analysis Type:	PANTHER Overrepresentation Test (Released 20220202)
Annotation Version and Release Date:	GO Ontology database DOI: 10.5281/zenodo.5725227 Released 2020-11-01
Analyzed List:	upload_1 (Streptococcus pneumoniae)
Reference List:	Streptococcus pneumoniae (all genes in database)
Test Type:	FISHER
Correction:	FDR
GO biological process complete	Streptococcus pneumoniae - REFLIST (2030)	upload_1 (19)	upload_1 (expected)	upload_1 (over/under)	upload_1 (fold Enrichment)	upload_1 (raw P-value)	upload_1 (FDR)
reproduction of a single-celled organism (GO:0032505)	5	3	.05	+	64.11	3.68E-05	2.99E-02
FtsZ-dependent cytokinesis (GO:0043093)	5	3	.05	+	64.11	3.68E-05	1.99E-02
asexual reproduction (GO:0019954)	5	3	.05	+	64.11	3.68E-05	1.49E-02
reproductive process (GO:0022414)	6	3	.06	+	53.42	5.49E-05	1.78E-02
reproduction (GO:0000003)	6	3	.06	+	53.42	5.49E-05	1.49E-02
cytokinesis (GO:0000910)	9	3	.08	+	35.61	1.41E-04	3.28E-02
cell division (GO:0051301)	34	5	.32	+	15.71	1.84E-05	2.99E-02

## Sheet: Min_vs_Middle_DepletedHits
GO enrichment analysis
Input = genes corresponding to sgRNAs that are significantly depleted in the FSCMin versus FSCMiddle population
Interpretation = Depletion of these genes leads to larger cell sizes
*No biological processes were found to be significantly up or downregulated
Analysis Type:	PANTHER Overrepresentation Test (Released 20220202)
Annotation Version and Release Date:	GO Ontology database DOI: 10.5281/zenodo.5725227 Released 2020-11-01
Analyzed List:	upload_1 (Streptococcus pneumoniae)
Reference List:	Streptococcus pneumoniae (all genes in database)
Test Type:	FISHER
Correction:	FDR
GO biological process complete	Streptococcus pneumoniae - REFLIST (2030)	upload_1 (2)	upload_1 (expected)	upload_1 (over/under)	upload_1 (fold Enrichment)	upload_1 (raw P-value)	upload_1 (FDR)

## Sheet: Max_vs_Min_EnrichedHits
GO enrichment analysis
Input = genes corresponding to sgRNAs that are significantly enriched in the FSCMax versus FSCMin population
Interpretation = Depletion of these genes leads to larger cell sizes
*No biological processes were found to be significantly up or downregulated
Analysis Type:	PANTHER Overrepresentation Test (Released 20220202)
Annotation Version and Release Date:	GO Ontology database DOI: 10.5281/zenodo.5725227 Released 2020-11-01
Analyzed List:	upload_1 (Streptococcus pneumoniae)
Reference List:	Streptococcus pneumoniae (all genes in database)
Test Type:	FISHER
Correction:	FDR
GO biological process complete	Streptococcus pneumoniae - REFLIST (2030)	upload_1 (43)	upload_1 (expected)	upload_1 (over/under)	upload_1 (fold Enrichment)	upload_1 (raw P-value)	upload_1 (FDR)

## Sheet: Max_vs_Middle_DepletedHits
GO enrichment analysis
Input = genes corresponding to sgRNAs that are significantly depleted in the FSCMax versus FSCMiddle population
Interpretation = Depletion of these genes leads to smaller cell sizes
Analysis Type:	PANTHER Overrepresentation Test (Released 20220202)
Annotation Version and Release Date:	GO Ontology database DOI: 10.5281/zenodo.5725227 Released 2020-11-01
Analyzed List:	upload_1 (Streptococcus pneumoniae)
Reference List:	Streptococcus pneumoniae (all genes in database)
Test Type:	FISHER
Correction:	FDR
GO biological process complete	Streptococcus pneumoniae - REFLIST (2030)	upload_1 (221)	upload_1 (expected)	upload_1 (over/under)	upload_1 (fold Enrichment)	upload_1 (raw P-value)	upload_1 (FDR)
ATP synthesis coupled proton transport (GO:0015986)	8	8	.87	+	9.19	4.90E-05	1.28E-03
energy coupled proton transport, down electrochemical gradient (GO:0015985)	8	8	.87	+	9.19	4.90E-05	1.26E-03
ATP biosynthetic process (GO:0006754)	9	8	.98	+	8.16	8.47E-05	2.02E-03
ATP metabolic process (GO:0046034)	19	16	2.07	+	7.74	3.29E-08	1.48E-06
ribonucleoside diphosphate metabolic process (GO:0009185)	12	10	1.31	+	7.65	1.53E-05	4.97E-04
purine ribonucleoside diphosphate metabolic process (GO:0009179)	11	9	1.20	+	7.52	4.62E-05	1.32E-03
purine nucleoside triphosphate biosynthetic process (GO:0009145)	11	9	1.20	+	7.52	4.62E-05	1.29E-03
purine nucleoside diphosphate metabolic process (GO:0009135)	11	9	1.20	+	7.52	4.62E-05	1.27E-03
purine ribonucleoside triphosphate biosynthetic process (GO:0009206)	11	9	1.20	+	7.52	4.62E-05	1.25E-03
purine ribonucleoside triphosphate metabolic process (GO:0009205)	11	9	1.20	+	7.52	4.62E-05	1.23E-03
nucleoside diphosphate metabolic process (GO:0009132)	15	12	1.63	+	7.35	2.75E-06	1.06E-04
ATP generation from ADP (GO:0006757)	10	8	1.09	+	7.35	1.40E-04	3.20E-03
glycolytic process (GO:0006096)	10	8	1.09	+	7.35	1.40E-04	3.15E-03
ADP metabolic process (GO:0046031)	10	8	1.09	+	7.35	1.40E-04	3.11E-03
tRNA aminoacylation for protein translation (GO:0006418)	22	17	2.40	+	7.10	2.89E-08	1.34E-06
nucleoside diphosphate phosphorylation (GO:0006165)	12	9	1.31	+	6.89	7.41E-05	1.82E-03
nucleotide phosphorylation (GO:0046939)	12	9	1.31	+	6.89	7.41E-05	1.80E-03
proton transmembrane transport (GO:1902600)	11	8	1.20	+	6.68	2.21E-04	4.79E-03
ribonucleoside triphosphate metabolic process (GO:0009199)	14	10	1.52	+	6.56	3.88E-05	1.15E-03
ribonucleoside triphosphate biosynthetic process (GO:0009201)	14	10	1.52	+	6.56	3.88E-05	1.13E-03
tRNA aminoacylation (GO:0043039)	24	17	2.61	+	6.51	7.17E-08	3.15E-06
amino acid activation (GO:0043038)	24	17	2.61	+	6.51	7.17E-08	3.07E-06
purine nucleoside triphosphate metabolic process (GO:0009144)	13	9	1.42	+	6.36	1.15E-04	2.66E-03
nucleoside triphosphate biosynthetic process (GO:0009142)	16	11	1.74	+	6.32	2.02E-05	6.43E-04
pyruvate metabolic process (GO:0006090)	12	8	1.31	+	6.12	3.38E-04	7.22E-03
nucleoside triphosphate metabolic process (GO:0009141)	19	11	2.07	+	5.32	6.47E-05	1.62E-03
translation (GO:0006412)	102	51	11.10	+	4.59	4.78E-17	7.76E-15
peptide biosynthetic process (GO:0043043)	105	51	11.43	+	4.46	1.23E-16	1.67E-14
inorganic cation transmembrane transport (GO:0098662)	19	9	2.07	+	4.35	9.40E-04	1.86E-02
RNA biosynthetic process (GO:0032774)	19	9	2.07	+	4.35	9.40E-04	1.84E-02
tRNA metabolic process (GO:0006399)	60	28	6.53	+	4.29	4.31E-09	2.12E-07
peptide metabolic process (GO:0006518)	113	52	12.30	+	4.23	3.50E-16	4.05E-14
amide biosynthetic process (GO:0043604)	114	51	12.41	+	4.11	1.81E-15	1.84E-13
protein transport (GO:0015031)	18	8	1.96	+	4.08	2.49E-03	4.44E-02
establishment of protein localization (GO:0045184)	18	8	1.96	+	4.08	2.49E-03	4.39E-02
cellular amide metabolic process (GO:0043603)	133	53	14.48	+	3.66	2.17E-14	1.86E-12
purine ribonucleotide metabolic process (GO:0009150)	54	21	5.88	+	3.57	4.56E-06	1.65E-04
purine nucleotide metabolic process (GO:0006163)	60	23	6.53	+	3.52	1.89E-06	7.50E-05
gene expression (GO:0010467)	195	74	21.23	+	3.49	1.84E-19	5.97E-17
cellular macromolecule biosynthetic process (GO:0034645)	199	75	21.66	+	3.46	1.31E-19	5.32E-17
ncRNA metabolic process (GO:0034660)	88	33	9.58	+	3.44	1.30E-08	6.21E-07
RNA metabolic process (GO:0016070)	118	44	12.85	+	3.43	3.50E-11	2.28E-09
purine-containing compound metabolic process (GO:0072521)	62	23	6.75	+	3.41	2.98E-06	1.13E-04
macromolecule biosynthetic process (GO:0009059)	204	75	22.21	+	3.38	4.36E-19	1.18E-16
cellular protein metabolic process (GO:0044267)	154	53	16.77	+	3.16	2.77E-12	1.95E-10
tRNA processing (GO:0008033)	35	12	3.81	+	3.15	1.38E-03	2.60E-02
monocarboxylic acid metabolic process (GO:0032787)	35	12	3.81	+	3.15	1.38E-03	2.57E-02
ribose phosphate metabolic process (GO:0019693)	73	25	7.95	+	3.15	3.52E-06	1.30E-04
ribonucleotide metabolic process (GO:0009259)	69	23	7.51	+	3.06	1.29E-05	4.45E-04
purine nucleotide biosynthetic process (GO:0006164)	43	14	4.68	+	2.99	8.43E-04	1.73E-02
purine-containing compound biosynthetic process (GO:0072522)	43	14	4.68	+	2.99	8.43E-04	1.71E-02
cellular nitrogen compound biosynthetic process (GO:0044271)	259	82	28.20	+	2.91	1.10E-17	1.98E-15
organonitrogen compound biosynthetic process (GO:1901566)	290	85	31.57	+	2.69	1.38E-16	1.72E-14
ribose phosphate biosynthetic process (GO:0046390)	56	16	6.10	+	2.62	1.70E-03	3.06E-02
nucleotide metabolic process (GO:0009117)	95	27	10.34	+	2.61	2.75E-05	8.57E-04
protein metabolic process (GO:0019538)	208	58	22.64	+	2.56	3.92E-10	2.05E-08
nucleoside phosphate metabolic process (GO:0006753)	97	27	10.56	+	2.56	3.62E-05	1.11E-03
biosynthetic process (GO:0009058)	411	114	44.74	+	2.55	4.23E-22	6.87E-19
RNA processing (GO:0006396)	65	18	7.08	+	2.54	9.54E-04	1.84E-02
cellular biosynthetic process (GO:0044249)	395	109	43.00	+	2.53	1.08E-20	5.84E-18
organic substance biosynthetic process (GO:1901576)	403	111	43.87	+	2.53	3.78E-21	3.07E-18
ncRNA processing (GO:0034470)	63	17	6.86	+	2.48	1.64E-03	2.98E-02
nucleobase-containing compound biosynthetic process (GO:0034654)	112	29	12.19	+	2.38	5.88E-05	1.49E-03
nucleotide biosynthetic process (GO:0009165)	70	18	7.62	+	2.36	2.66E-03	4.64E-02
carbohydrate derivative biosynthetic process (GO:1901137)	109	28	11.87	+	2.36	9.01E-05	2.12E-03
nucleoside phosphate biosynthetic process (GO:1901293)	71	18	7.73	+	2.33	2.80E-03	4.84E-02
cellular nitrogen compound metabolic process (GO:0034641)	464	115	50.51	+	2.28	1.19E-18	2.76E-16
cellular macromolecule metabolic process (GO:0044260)	352	86	38.32	+	2.24	1.39E-12	1.07E-10
organic acid metabolic process (GO:0006082)	165	40	17.96	+	2.23	1.05E-05	3.70E-04
oxoacid metabolic process (GO:0043436)	157	38	17.09	+	2.22	1.39E-05	4.70E-04
carboxylic acid metabolic process (GO:0019752)	157	38	17.09	+	2.22	1.39E-05	4.60E-04
nucleic acid metabolic process (GO:0090304)	211	51	22.97	+	2.22	3.71E-07	1.55E-05
nucleobase-containing compound metabolic process (GO:0006139)	331	79	36.03	+	2.19	4.89E-11	3.05E-09
carbohydrate derivative metabolic process (GO:1901135)	168	39	18.29	+	2.13	3.74E-05	1.12E-03
cellular amino acid metabolic process (GO:0006520)	112	26	12.19	+	2.13	9.20E-04	1.85E-02
organophosphate metabolic process (GO:0019637)	134	31	14.59	+	2.13	2.07E-04	4.55E-03
nucleobase-containing small molecule metabolic process (GO:0055086)	123	28	13.39	+	2.09	5.78E-04	1.22E-02
organonitrogen compound metabolic process (GO:1901564)	444	101	48.34	+	2.09	1.70E-13	1.38E-11
cellular aromatic compound metabolic process (GO:0006725)	376	84	40.93	+	2.05	1.97E-10	1.19E-08
heterocycle metabolic process (GO:0046483)	372	83	40.50	+	2.05	2.98E-10	1.73E-08
organic cyclic compound metabolic process (GO:1901360)	383	84	41.70	+	2.01	4.64E-10	2.36E-08
macromolecule metabolic process (GO:0043170)	448	98	48.77	+	2.01	4.71E-12	3.19E-10
aromatic compound biosynthetic process (GO:0019438)	155	33	16.87	+	1.96	7.33E-04	1.53E-02
heterocycle biosynthetic process (GO:0018130)	152	32	16.55	+	1.93	1.05E-03	2.00E-02
nitrogen compound metabolic process (GO:0006807)	633	133	68.91	+	1.93	6.62E-17	9.77E-15
small molecule metabolic process (GO:0044281)	312	64	33.97	+	1.88	1.51E-06	6.13E-05
organic cyclic compound biosynthetic process (GO:1901362)	163	33	17.75	+	1.86	1.47E-03	2.72E-02
cellular metabolic process (GO:0044237)	724	146	78.82	+	1.85	5.08E-18	1.03E-15
primary metabolic process (GO:0044238)	697	138	75.88	+	1.82	1.08E-15	1.16E-13
organic substance metabolic process (GO:0071704)	773	144	84.15	+	1.71	1.38E-14	1.24E-12
metabolic process (GO:0008152)	834	152	90.80	+	1.67	3.97E-15	3.79E-13
cellular process (GO:0009987)	1016	165	110.61	+	1.49	1.69E-12	1.24E-10
biological_process (GO:0008150)	1212	178	131.95	+	1.35	3.62E-10	2.03E-08
Unclassified (UNCLASSIFIED)	818	43	89.05	-	.48	3.62E-10	1.96E-08

## Sheet: Min_vs_Middle_EnrichedHits
GO enrichment analysis
Input = genes corresponding to sgRNAs that are significantly enriched in the FSCMin versus FSCMiddle population
Interpretation = Depletion of these genes leads to smaller cell sizes
Analysis Type:	PANTHER Overrepresentation Test (Released 20220202)
Annotation Version and Release Date:	GO Ontology database DOI: 10.5281/zenodo.5725227 Released 2020-11-01
Analyzed List:	upload_1 (Streptococcus pneumoniae)
Reference List:	Streptococcus pneumoniae (all genes in database)
Test Type:	FISHER
Correction:	FDR
GO biological process complete	Streptococcus pneumoniae - REFLIST (2030)	upload_1 (163)	upload_1 (expected)	upload_1 (over/under)	upload_1 (fold Enrichment)	upload_1 (raw P-value)	upload_1 (FDR)
tRNA aminoacylation (GO:0043039)	24	22	1.93	+	11.42	6.21E-14	3.88E-12
amino acid activation (GO:0043038)	24	22	1.93	+	11.42	6.21E-14	3.73E-12
tRNA aminoacylation for protein translation (GO:0006418)	22	20	1.77	+	11.32	1.06E-12	5.71E-11
purine ribonucleoside diphosphate metabolic process (GO:0009179)	11	8	.88	+	9.06	2.93E-05	1.08E-03
purine nucleoside diphosphate metabolic process (GO:0009135)	11	8	.88	+	9.06	2.93E-05	1.06E-03
aminoacyl-tRNA metabolism involved in translational fidelity (GO:0106074)	7	5	.56	+	8.90	1.10E-03	3.25E-02
regulation of translational fidelity (GO:0006450)	10	7	.80	+	8.72	1.14E-04	3.76E-03
ATP generation from ADP (GO:0006757)	10	7	.80	+	8.72	1.14E-04	3.69E-03
glycolytic process (GO:0006096)	10	7	.80	+	8.72	1.14E-04	3.62E-03
ADP metabolic process (GO:0046031)	10	7	.80	+	8.72	1.14E-04	3.55E-03
translation (GO:0006412)	102	68	8.19	+	8.30	9.82E-38	7.98E-35
ribonucleoside diphosphate metabolic process (GO:0009185)	12	8	.96	+	8.30	4.58E-05	1.62E-03
nucleoside diphosphate phosphorylation (GO:0006165)	12	8	.96	+	8.30	4.58E-05	1.58E-03
nucleotide phosphorylation (GO:0046939)	12	8	.96	+	8.30	4.58E-05	1.55E-03
peptide biosynthetic process (GO:0043043)	105	68	8.43	+	8.07	3.86E-37	2.09E-34
peptide metabolic process (GO:0006518)	113	68	9.07	+	7.49	1.26E-35	5.11E-33
nucleoside diphosphate metabolic process (GO:0009132)	15	9	1.20	+	7.47	2.76E-05	1.04E-03
amide biosynthetic process (GO:0043604)	114	68	9.15	+	7.43	1.92E-35	6.23E-33
pyruvate metabolic process (GO:0006090)	12	7	.96	+	7.26	2.59E-04	7.93E-03
cellular amide metabolic process (GO:0043603)	133	68	10.68	+	6.37	3.17E-32	8.57E-30
tRNA metabolic process (GO:0006399)	60	29	4.82	+	6.02	8.27E-13	4.63E-11
cellular protein metabolic process (GO:0044267)	154	69	12.37	+	5.58	6.08E-30	1.10E-27
gene expression (GO:0010467)	195	86	15.66	+	5.49	1.42E-38	2.30E-35
RNA biosynthetic process (GO:0032774)	19	8	1.53	+	5.24	5.13E-04	1.54E-02
cellular macromolecule biosynthetic process (GO:0034645)	199	79	15.98	+	4.94	4.08E-32	9.47E-30
macromolecule biosynthetic process (GO:0009059)	204	79	16.38	+	4.82	1.70E-31	3.46E-29
ncRNA metabolic process (GO:0034660)	88	33	7.07	+	4.67	5.04E-12	2.64E-10
RNA metabolic process (GO:0016070)	118	41	9.47	+	4.33	5.88E-14	3.82E-12
protein metabolic process (GO:0019538)	208	71	16.70	+	4.25	6.41E-25	8.67E-23
cellular nitrogen compound biosynthetic process (GO:0044271)	259	80	20.80	+	3.85	2.92E-26	4.31E-24
cellular component assembly (GO:0022607)	30	9	2.41	+	3.74	1.68E-03	4.88E-02
organonitrogen compound biosynthetic process (GO:1901566)	290	76	23.29	+	3.26	8.62E-21	7.78E-19
cellular macromolecule metabolic process (GO:0044260)	352	87	28.26	+	3.08	4.31E-23	5.39E-21
organic substance biosynthetic process (GO:1901576)	403	91	32.36	+	2.81	5.85E-22	6.33E-20
cellular biosynthetic process (GO:0044249)	395	89	31.72	+	2.81	3.02E-21	2.89E-19
cellular nitrogen compound metabolic process (GO:0034641)	464	104	37.26	+	2.79	2.39E-26	3.88E-24
biosynthetic process (GO:0009058)	411	92	33.00	+	2.79	4.83E-22	5.60E-20
cellular amino acid metabolic process (GO:0006520)	112	25	8.99	+	2.78	1.20E-05	4.64E-04
nucleic acid metabolic process (GO:0090304)	211	46	16.94	+	2.72	2.26E-09	1.08E-07
macromolecule metabolic process (GO:0043170)	448	95	35.97	+	2.64	2.75E-21	2.79E-19
oxoacid metabolic process (GO:0043436)	157	33	12.61	+	2.62	1.43E-06	5.95E-05
carboxylic acid metabolic process (GO:0019752)	157	33	12.61	+	2.62	1.43E-06	5.80E-05
organic acid metabolic process (GO:0006082)	165	33	13.25	+	2.49	5.21E-06	2.06E-04
organonitrogen compound metabolic process (GO:1901564)	444	88	35.65	+	2.47	2.08E-17	1.54E-15
nucleobase-containing compound metabolic process (GO:0006139)	331	59	26.58	+	2.22	6.50E-09	3.02E-07
nitrogen compound metabolic process (GO:0006807)	633	111	50.83	+	2.18	2.23E-20	1.91E-18
primary metabolic process (GO:0044238)	697	115	55.97	+	2.05	1.86E-19	1.51E-17
heterocycle metabolic process (GO:0046483)	372	59	29.87	+	1.98	3.09E-07	1.40E-05
cellular metabolic process (GO:0044237)	724	114	58.13	+	1.96	1.86E-17	1.44E-15
cellular aromatic compound metabolic process (GO:0006725)	376	59	30.19	+	1.95	3.69E-07	1.62E-05
organic cyclic compound metabolic process (GO:1901360)	383	59	30.75	+	1.92	7.33E-07	3.13E-05
organic substance metabolic process (GO:0071704)	773	115	62.07	+	1.85	9.54E-16	6.74E-14
metabolic process (GO:0008152)	834	117	66.97	+	1.75	3.31E-14	2.24E-12
cellular process (GO:0009987)	1016	129	81.58	+	1.58	2.11E-13	1.22E-11
biological_process (GO:0008150)	1212	136	97.32	+	1.40	3.23E-10	1.59E-08
Unclassified (UNCLASSIFIED)	818	27	65.68	-	.41	3.23E-10	1.64E-08

## Sheet: Max_vs_Min_DepletedHits
GO enrichment analysis
Input = genes corresponding to sgRNAs that are significantly depleted in the FSCMax versus FSCMin population
Interpretation = Depletion of these genes leads to smaller cell sizes
Analysis Type:	PANTHER Overrepresentation Test (Released 20220202)
Annotation Version and Release Date:	GO Ontology database DOI: 10.5281/zenodo.5725227 Released 2020-11-01
Analyzed List:	upload_1 (Streptococcus pneumoniae)
Reference List:	Streptococcus pneumoniae (all genes in database)
Test Type:	FISHER
Correction:	FDR
GO biological process complete	Streptococcus pneumoniae - REFLIST (2030)	upload_1 (360)	upload_1 (expected)	upload_1 (over/under)	upload_1 (fold Enrichment)	upload_1 (raw P-value)	upload_1 (FDR)
ATP synthesis coupled proton transport (GO:0015986)	8	8	1.42	+	5.64	1.04E-03	1.97E-02
energy coupled proton transport, down electrochemical gradient (GO:0015985)	8	8	1.42	+	5.64	1.04E-03	1.94E-02
ribonucleoside diphosphate metabolic process (GO:0009185)	12	11	2.13	+	5.17	1.91E-04	4.71E-03
tRNA aminoacylation (GO:0043039)	24	22	4.26	+	5.17	1.09E-07	5.06E-06
amino acid activation (GO:0043038)	24	22	4.26	+	5.17	1.09E-07	4.92E-06
purine ribonucleoside diphosphate metabolic process (GO:0009179)	11	10	1.95	+	5.13	3.96E-04	9.06E-03
purine nucleoside diphosphate metabolic process (GO:0009135)	11	10	1.95	+	5.13	3.96E-04	8.94E-03
tRNA aminoacylation for protein translation (GO:0006418)	22	20	3.90	+	5.13	4.64E-07	1.98E-05
ATP generation from ADP (GO:0006757)	10	9	1.77	+	5.08	8.22E-04	1.65E-02
glycolytic process (GO:0006096)	10	9	1.77	+	5.08	8.22E-04	1.63E-02
ADP metabolic process (GO:0046031)	10	9	1.77	+	5.08	8.22E-04	1.61E-02
ATP metabolic process (GO:0046034)	19	17	3.37	+	5.05	4.05E-06	1.57E-04
ATP biosynthetic process (GO:0006754)	9	8	1.60	+	5.01	1.71E-03	2.87E-02
nucleoside diphosphate metabolic process (GO:0009132)	15	13	2.66	+	4.89	7.24E-05	1.93E-03
nucleoside diphosphate phosphorylation (GO:0006165)	12	10	2.13	+	4.70	6.30E-04	1.33E-02
nucleotide phosphorylation (GO:0046939)	12	10	2.13	+	4.70	6.30E-04	1.31E-02
purine nucleoside triphosphate biosynthetic process (GO:0009145)	11	9	1.95	+	4.61	1.30E-03	2.29E-02
purine ribonucleoside triphosphate biosynthetic process (GO:0009206)	11	9	1.95	+	4.61	1.30E-03	2.27E-02
purine ribonucleoside triphosphate metabolic process (GO:0009205)	11	9	1.95	+	4.61	1.30E-03	2.25E-02
translation (GO:0006412)	102	83	18.09	+	4.59	1.77E-24	2.61E-22
peptide biosynthetic process (GO:0043043)	105	84	18.62	+	4.51	1.95E-24	2.64E-22
amide biosynthetic process (GO:0043604)	114	89	20.22	+	4.40	1.95E-25	3.95E-23
peptide metabolic process (GO:0006518)	113	85	20.04	+	4.24	1.88E-23	2.35E-21
pyruvate metabolic process (GO:0006090)	12	9	2.13	+	4.23	1.98E-03	3.18E-02
fatty acid biosynthetic process (GO:0006633)	15	11	2.66	+	4.14	7.13E-04	1.47E-02
fatty acid metabolic process (GO:0006631)	15	11	2.66	+	4.14	7.13E-04	1.45E-02
ribonucleoside triphosphate metabolic process (GO:0009199)	14	10	2.48	+	4.03	1.44E-03	2.46E-02
ribonucleoside triphosphate biosynthetic process (GO:0009201)	14	10	2.48	+	4.03	1.44E-03	2.44E-02
purine nucleoside triphosphate metabolic process (GO:0009144)	13	9	2.31	+	3.90	2.91E-03	4.33E-02
nucleoside triphosphate biosynthetic process (GO:0009142)	16	11	2.84	+	3.88	1.04E-03	1.92E-02
cellular amide metabolic process (GO:0043603)	133	91	23.59	+	3.86	4.51E-23	5.23E-21
RNA biosynthetic process (GO:0032774)	19	12	3.37	+	3.56	1.06E-03	1.94E-02
monocarboxylic acid metabolic process (GO:0032787)	35	22	6.21	+	3.54	9.57E-06	3.53E-04
cellular macromolecule biosynthetic process (GO:0034645)	199	121	35.29	+	3.43	5.74E-28	2.33E-25
tRNA metabolic process (GO:0006399)	60	36	10.64	+	3.38	2.88E-08	1.38E-06
gene expression (GO:0010467)	195	116	34.58	+	3.35	5.10E-26	1.18E-23
macromolecule biosynthetic process (GO:0009059)	204	121	36.18	+	3.34	3.27E-27	1.06E-24
nucleoside triphosphate metabolic process (GO:0009141)	19	11	3.37	+	3.26	2.85E-03	4.37E-02
monocarboxylic acid biosynthetic process (GO:0072330)	19	11	3.37	+	3.26	2.85E-03	4.33E-02
cellular protein metabolic process (GO:0044267)	154	89	27.31	+	3.26	1.30E-18	1.00E-16
lipid biosynthetic process (GO:0008610)	33	18	5.85	+	3.08	2.44E-04	5.83E-03
ncRNA metabolic process (GO:0034660)	88	47	15.61	+	3.01	3.30E-09	1.62E-07
RNA metabolic process (GO:0016070)	118	63	20.93	+	3.01	5.50E-12	3.19E-10
cellular lipid metabolic process (GO:0044255)	36	19	6.38	+	2.98	3.40E-04	7.88E-03
cellular nitrogen compound biosynthetic process (GO:0044271)	259	135	45.93	+	2.94	1.74E-26	4.70E-24
purine ribonucleotide metabolic process (GO:0009150)	54	28	9.58	+	2.92	1.06E-05	3.83E-04
generation of precursor metabolites and energy (GO:0006091)	27	14	4.79	+	2.92	2.91E-03	4.37E-02
regulation of cell shape (GO:0008360)	29	15	5.14	+	2.92	1.93E-03	3.19E-02
regulation of cell morphogenesis (GO:0022604)	29	15	5.14	+	2.92	1.93E-03	3.16E-02
regulation of anatomical structure morphogenesis (GO:0022603)	29	15	5.14	+	2.92	1.93E-03	3.13E-02
purine nucleotide metabolic process (GO:0006163)	60	30	10.64	+	2.82	1.32E-05	4.56E-04
cell wall organization (GO:0071555)	28	14	4.97	+	2.82	3.25E-03	4.79E-02
lipid metabolic process (GO:0006629)	39	19	6.92	+	2.75	5.63E-04	1.23E-02
purine-containing compound metabolic process (GO:0072521)	62	30	11.00	+	2.73	1.68E-05	5.68E-04
regulation of developmental process (GO:0050793)	31	15	5.50	+	2.73	2.54E-03	3.97E-02
ribosome biogenesis (GO:0042254)	45	21	7.98	+	2.63	6.27E-04	1.36E-02
ribonucleoprotein complex biogenesis (GO:0022613)	45	21	7.98	+	2.63	6.27E-04	1.34E-02
protein metabolic process (GO:0019538)	208	97	36.89	+	2.63	1.56E-15	1.02E-13
purine nucleotide biosynthetic process (GO:0006164)	43	20	7.63	+	2.62	9.30E-04	1.80E-02
purine-containing compound biosynthetic process (GO:0072522)	43	20	7.63	+	2.62	9.30E-04	1.78E-02
purine ribonucleotide biosynthetic process (GO:0009152)	39	18	6.92	+	2.60	1.21E-03	2.17E-02
organonitrogen compound biosynthetic process (GO:1901566)	290	132	51.43	+	2.57	2.99E-21	3.04E-19
ribose phosphate metabolic process (GO:0019693)	73	33	12.95	+	2.55	1.85E-05	5.78E-04
ribonucleotide metabolic process (GO:0009259)	69	31	12.24	+	2.53	3.95E-05	1.13E-03
cellular biosynthetic process (GO:0044249)	395	174	70.05	+	2.48	9.51E-29	5.15E-26
biosynthetic process (GO:0009058)	411	181	72.89	+	2.48	2.23E-30	3.61E-27
organic substance biosynthetic process (GO:1901576)	403	177	71.47	+	2.48	2.40E-29	1.95E-26
nucleoside phosphate biosynthetic process (GO:1901293)	71	30	12.59	+	2.38	1.55E-04	3.94E-03
nucleobase-containing compound biosynthetic process (GO:0034654)	112	47	19.86	+	2.37	1.48E-06	6.03E-05
RNA processing (GO:0006396)	65	27	11.53	+	2.34	3.05E-04	7.19E-03
nucleotide biosynthetic process (GO:0009165)	70	29	12.41	+	2.34	2.44E-04	5.92E-03
ncRNA processing (GO:0034470)	63	26	11.17	+	2.33	4.36E-04	9.69E-03
nucleoside phosphate metabolic process (GO:0006753)	97	40	17.20	+	2.33	1.18E-05	4.15E-04
ribose phosphate biosynthetic process (GO:0046390)	56	23	9.93	+	2.32	1.11E-03	2.00E-02
nucleotide metabolic process (GO:0009117)	95	39	16.85	+	2.31	1.69E-05	5.61E-04
cellular component biogenesis (GO:0044085)	95	39	16.85	+	2.31	1.69E-05	5.50E-04
cellular component organization (GO:0016043)	89	36	15.78	+	2.28	5.02E-05	1.38E-03
cellular macromolecule metabolic process (GO:0044260)	352	140	62.42	+	2.24	2.17E-18	1.60E-16
regulation of biological quality (GO:0065008)	58	23	10.29	+	2.24	2.21E-03	3.48E-02
ribonucleotide biosynthetic process (GO:0009260)	53	21	9.40	+	2.23	2.57E-03	3.97E-02
carbohydrate derivative biosynthetic process (GO:1901137)	109	43	19.33	+	2.22	1.71E-05	5.45E-04
cellular nitrogen compound metabolic process (GO:0034641)	464	182	82.29	+	2.21	3.21E-25	5.79E-23
cellular component organization or biogenesis (GO:0071840)	129	49	22.88	+	2.14	9.36E-06	3.53E-04
organophosphate biosynthetic process (GO:0090407)	98	37	17.38	+	2.13	1.58E-04	3.94E-03
organophosphate metabolic process (GO:0019637)	134	49	23.76	+	2.06	2.07E-05	6.33E-04
nucleobase-containing small molecule metabolic process (GO:0055086)	123	44	21.81	+	2.02	7.47E-05	1.96E-03
carbohydrate derivative metabolic process (GO:1901135)	168	60	29.79	+	2.01	3.50E-06	1.39E-04
macromolecule metabolic process (GO:0043170)	448	160	79.45	+	2.01	1.17E-17	8.25E-16
organonitrogen compound metabolic process (GO:1901564)	444	158	78.74	+	2.01	3.01E-17	2.04E-15
nucleobase-containing compound metabolic process (GO:0006139)	331	117	58.70	+	1.99	7.88E-12	4.41E-10
nucleic acid metabolic process (GO:0090304)	211	74	37.42	+	1.98	3.43E-07	1.51E-05
oxoacid metabolic process (GO:0043436)	157	54	27.84	+	1.94	2.90E-05	8.57E-04
carboxylic acid metabolic process (GO:0019752)	157	54	27.84	+	1.94	2.90E-05	8.41E-04
heterocycle biosynthetic process (GO:0018130)	152	52	26.96	+	1.93	5.34E-05	1.45E-03
aromatic compound biosynthetic process (GO:0019438)	155	53	27.49	+	1.93	4.05E-05	1.13E-03
organic acid metabolic process (GO:0006082)	165	56	29.26	+	1.91	2.76E-05	8.30E-04
heterocycle metabolic process (GO:0046483)	372	123	65.97	+	1.86	8.22E-11	4.45E-09
nitrogen compound metabolic process (GO:0006807)	633	209	112.26	+	1.86	1.07E-21	1.15E-19
cellular aromatic compound metabolic process (GO:0006725)	376	124	66.68	+	1.86	9.31E-11	4.88E-09
organic cyclic compound biosynthetic process (GO:1901362)	163	53	28.91	+	1.83	1.30E-04	3.35E-03
organic cyclic compound metabolic process (GO:1901360)	383	124	67.92	+	1.83	2.06E-10	1.04E-08
cellular metabolic process (GO:0044237)	724	233	128.39	+	1.81	1.41E-24	2.29E-22
primary metabolic process (GO:0044238)	697	220	123.61	+	1.78	3.47E-21	3.32E-19
small molecule metabolic process (GO:0044281)	312	95	55.33	+	1.72	9.63E-07	4.01E-05
organic substance metabolic process (GO:0071704)	773	230	137.08	+	1.68	1.38E-19	1.12E-17
metabolic process (GO:0008152)	834	242	147.90	+	1.64	5.36E-20	4.84E-18
phosphorus metabolic process (GO:0006793)	215	59	38.13	+	1.55	2.20E-03	3.51E-02
cellular process (GO:0009987)	1016	272	180.18	+	1.51	6.64E-20	5.67E-18
biological_process (GO:0008150)	1212	290	214.94	+	1.35	4.86E-15	2.92E-13
Unclassified (UNCLASSIFIED)	818	70	145.06	-	.48	4.86E-15	3.03E-13
